# Supplementary material for: Abundant CpG-sequences in human genomes inhibit KIR3DL2-expressing NK cells
Source: PeerJ journal article supplement (doi:10.7717/peerj.12258), 2021-11-05

# Supplemental Data 2

A

| Length (Bases) | Sequence                 |
|----------------|--------------------------|
| L=5            | TT <b>CG</b> TF          |
| L=6            | TT <b>CG</b> TT <b>F</b> |
| L=7            | TT <b>CG</b> TT <b>F</b> |
| L=8            | TT <b>CG</b> TT <b>F</b> |
| L=9            | TT <b>CG</b> TT <b>F</b> |
| L=10           | TT <b>CG</b> TT <b>F</b> |
| L=12           | TT <b>CG</b> TT <b>F</b> |
| L=14           | TT <b>CG</b> TT <b>F</b> |
| L=16           | TT <b>CG</b> TT <b>F</b> |
| L=18           | TT <b>CG</b> TT <b>F</b> |
| L=21           | TT <b>CG</b> TT <b>F</b> |
| L=24           | TT <b>CG</b> TT <b>F</b> |
| L=28           | TT <b>CG</b> TT <b>F</b> |
| L=30           | TT <b>CG</b> TT <b>F</b> |
| L=32           | TT <b>CG</b> TT <b>F</b> |
| L=35           | TT <b>CG</b> TT <b>F</b> |
| L=40           | TT <b>CG</b> TT <b>F</b> |

B

| Length (Bases) | CpG motifs | Sequence                                                                     |
|----------------|------------|------------------------------------------------------------------------------|
| L=10           | 2 x CpG    | TT <b>CG</b> TT <b>CG</b> TF                                                 |
| L=12           | 2 x CpG    | TT <b>CG</b> TT <b>CG</b> TT <b>F</b>                                        |
| L=14           | 2 x CpG    | TT <b>CG</b> TT <b>CG</b> TT <b>F</b>                                        |
| L=15           | 2 x CpG    | TT <b>CG</b> TT <b>CG</b> TT <b>F</b>                                        |
| L=18           | 2 x CpG    | TT <b>CG</b> TT <b>CG</b> TT <b>F</b>                                        |
| L=21           | 3 x CpG    | TT <b>CG</b> TT <b>CG</b> TT <b>CG</b> TT <b>F</b>                           |
| L=24           | 4 x CpG    | TT <b>CG</b> TT <b>CG</b> TT <b>CG</b> TT <b>CG</b> TT <b>F</b>              |
| L=30           | 3 x CpG    | TT <b>CG</b> TT <b>CG</b> TT <b>CG</b> TT <b>CG</b> TT <b>F</b>              |
| L=36           | 4 x CpG    | TT <b>CG</b> TT <b>CG</b> TT <b>CG</b> TT <b>CG</b> TT <b>CG</b> TT <b>F</b> |
| L=40           | 4 x CpG    | TT <b>CG</b> TT <b>CG</b> TT <b>CG</b> TT <b>CG</b> TT <b>CG</b> TT <b>F</b> |

C

| CpG Interdistance | Sequence                              |
|-------------------|---------------------------------------|
| CpG-ID = 1        | TT <b>CG</b> TT <b>CG</b> TT <b>F</b> |
| CpG-ID = 2        | TT <b>CG</b> TT <b>CG</b> TT <b>F</b> |
| CpG-ID = 3        | TT <b>CG</b> TT <b>CG</b> TT <b>F</b> |
| CpG-ID = 4        | TT <b>CG</b> TT <b>CG</b> TT <b>F</b> |
| CpG-ID = 5        | TT <b>CG</b> TT <b>CG</b> TT <b>F</b> |
| CpG-ID = 6        | TT <b>CG</b> TT <b>CG</b> TT <b>F</b> |
| CpG-ID = 7        | TT <b>CG</b> TT <b>CG</b> TT <b>F</b> |
| CpG-ID = 8        | TT <b>CG</b> TT <b>CG</b> TT <b>F</b> |

D

| Core Length | Core Sequence   | Repeats | Full Sequence                                                   |
|-------------|-----------------|---------|-----------------------------------------------------------------|
| Pentamer    | TT <b>CG</b> T  | 1x      | TT <b>CG</b> TF                                                 |
|             |                 | 2x      | TT <b>CG</b> TT <b>CG</b> TF                                    |
|             |                 | 3x      | TT <b>CG</b> TT <b>CG</b> TT <b>CG</b> TF                       |
|             |                 | 4x      | TT <b>CG</b> TT <b>CG</b> TT <b>CG</b> TT <b>CG</b> TF          |
| Hexamer     | TT <b>CG</b> TT | 1x      | TT <b>CG</b> TT <b>F</b>                                        |
|             |                 | 2x      | TT <b>CG</b> TT <b>CG</b> TT <b>F</b>                           |
|             |                 | 3x      | TT <b>CG</b> TT <b>CG</b> TT <b>CG</b> TT <b>F</b>              |
|             |                 | 4x      | TT <b>CG</b> TT <b>CG</b> TT <b>CG</b> TT <b>CG</b> TT <b>F</b> |
| Heptamer    | TT <b>CG</b> TT | 1x      | TT <b>CG</b> TT <b>F</b>                                        |
|             |                 | 2x      | TT <b>CG</b> TT <b>CG</b> TT <b>F</b>                           |
|             |                 | 3x      | TT <b>CG</b> TT <b>CG</b> TT <b>CG</b> TT <b>F</b>              |
|             |                 | 4x      | TT <b>CG</b> TT <b>CG</b> TT <b>CG</b> TT <b>CG</b> TT <b>F</b> |
| Octoamer    | TT <b>CG</b> TT | 1x      | TT <b>CG</b> TT <b>F</b>                                        |
|             |                 | 2x      | TT <b>CG</b> TT <b>CG</b> TT <b>F</b>                           |
|             |                 | 3x      | TT <b>CG</b> TT <b>CG</b> TT <b>CG</b> TT <b>F</b>              |
|             |                 | 4x      | TT <b>CG</b> TT <b>CG</b> TT <b>CG</b> TT <b>CG</b> TT <b>F</b> |
| Nonamer     | TT <b>CG</b> TT | 1x      | TT <b>CG</b> TT <b>F</b>                                        |
|             |                 | 2x      | TT <b>CG</b> TT <b>CG</b> TT <b>F</b>                           |
|             |                 | 3x      | TT <b>CG</b> TT <b>CG</b> TT <b>CG</b> TT <b>F</b>              |
|             |                 | 4x      | TT <b>CG</b> TT <b>CG</b> TT <b>CG</b> TT <b>CG</b> TT <b>F</b> |
| Decamer     | TT <b>CG</b> TT | 1x      | TT <b>CG</b> TT <b>F</b>                                        |
|             |                 | 2x      | TT <b>CG</b> TT <b>CG</b> TT <b>F</b>                           |
|             |                 | 3x      | TT <b>CG</b> TT <b>CG</b> TT <b>CG</b> TT <b>F</b>              |
|             |                 | 4x      | TT <b>CG</b> TT <b>CG</b> TT <b>CG</b> TT <b>CG</b> TT <b>F</b> |

E

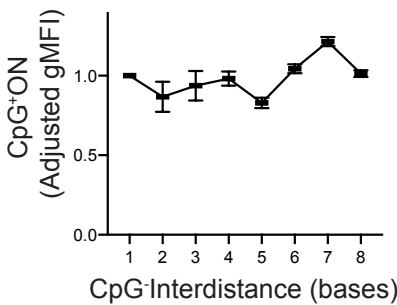

Supplement: Supp_data_2_PJ.pdf [file Supp_data_2_PJ.pdf]
