# Supplementary material for: Abundant CpG-sequences in human genomes inhibit KIR3DL2-expressing NK cells
Source: PubMed Central journal article supplement (PMC8574216; doi:10.7717/peerj.12258), 2021-11-05

# Supplemental Data 1

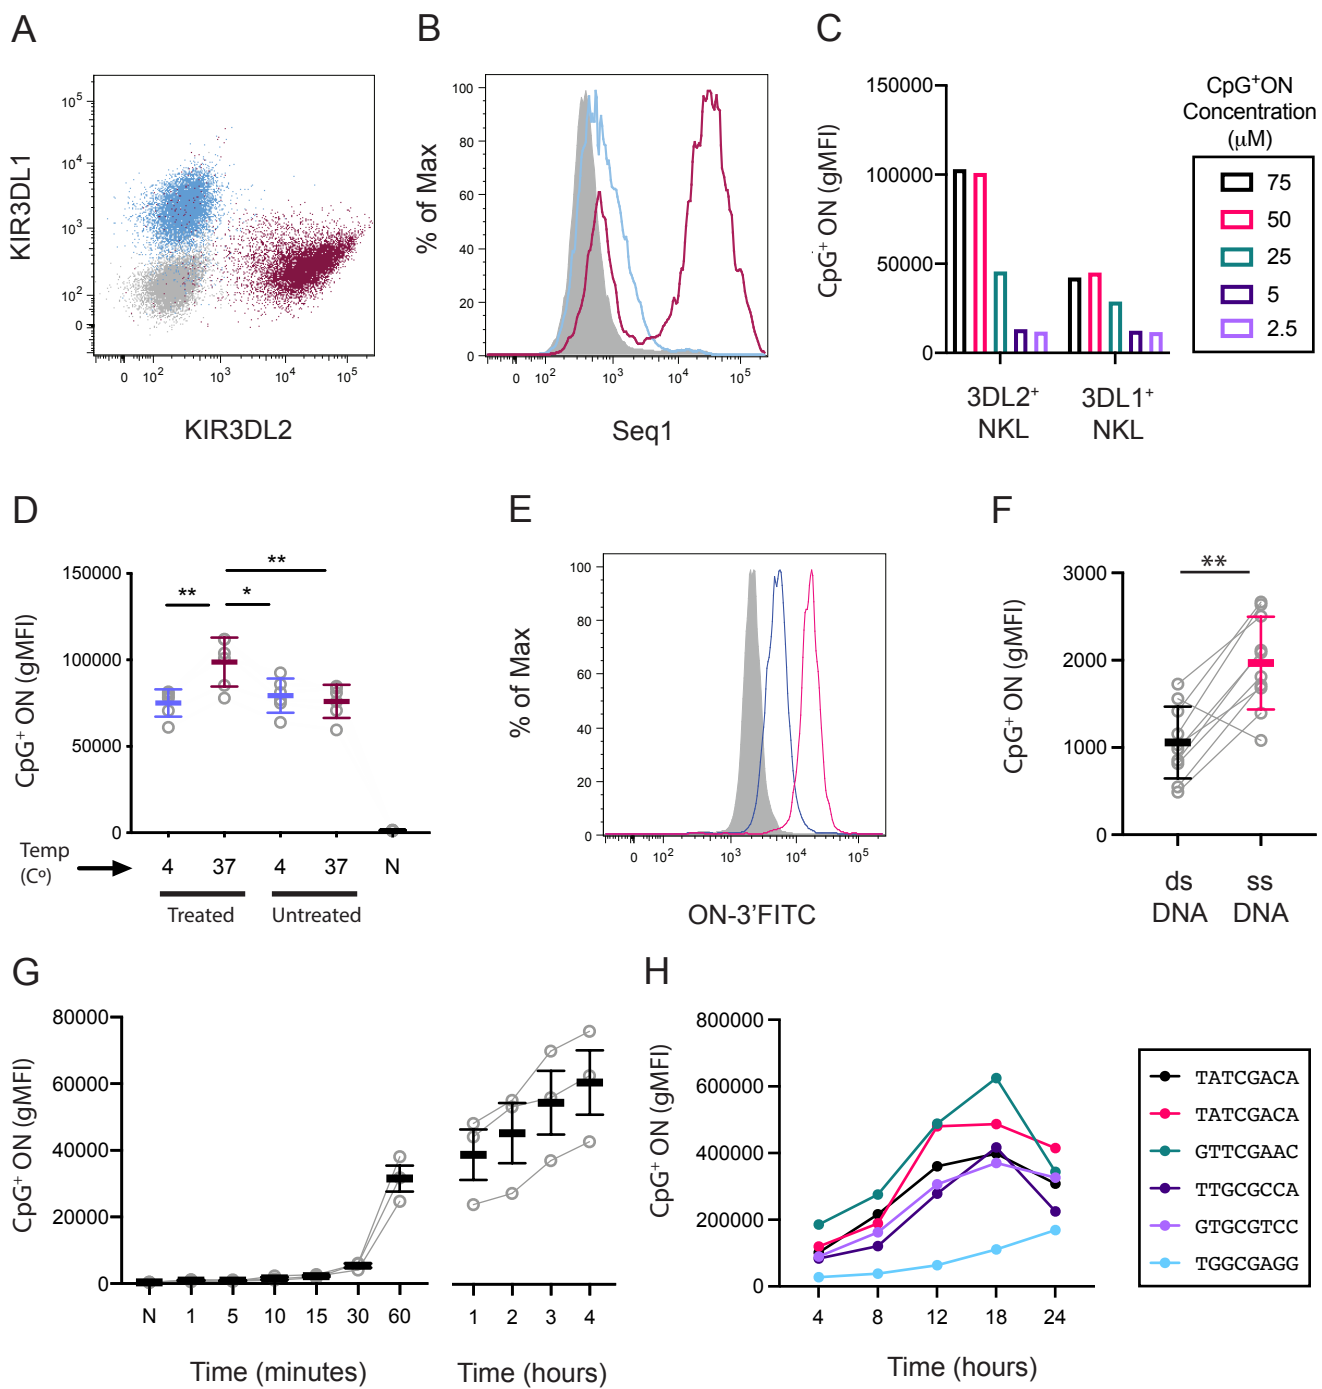

Supplement: peerj-09-12258-s001.pdf [file peerj-09-12258-s001.pdf]
