# Supplementary material for: Abundant CpG-sequences in human genomes inhibit KIR3DL2-expressing NK cells
Source: PeerJ journal article supplement (doi:10.7717/peerj.12258), 2021-11-05
Supplement: Supp_data_3_PJ.pdf [file Supp_data_3_PJ.pdf]

# Supplemental Data 3

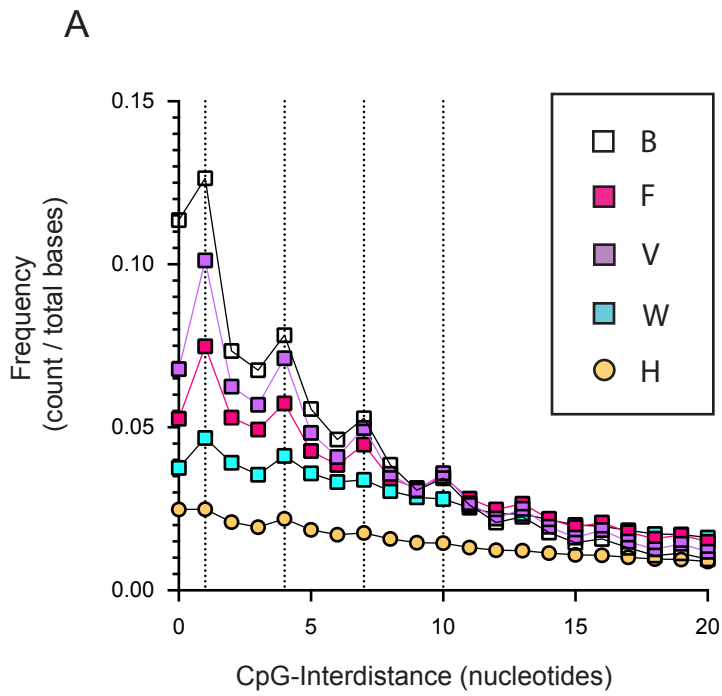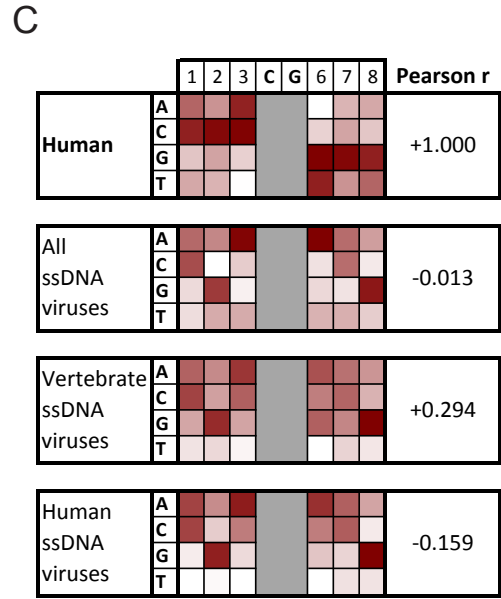

**B**

| Rank | Human    | B       | F        | V        | W        | HB      | HF       | HV       | HW        |
|------|----------|---------|----------|----------|----------|---------|----------|----------|-----------|
| 1    | CCCCGCC  | CGCCGCC | CATCGTCA | CGCCGCC  | TTTCGAAA | CGCCGCC | CATCGTCA | GCGCGCG  | TTTCGAAA  |
| 2    | GGCCGGG  | CGCCGCC | TGACGATG | CGCCGCC  | AAACGAAA | CGCCGCC | TGACGATG | GCGCGCGA | AAACGAAA  |
| 3    | CCACGTGG | CGCCGCC | CATCGACA | CGACGACG | TTTCGTTT | CGCCGCC | CATCGCCA | CGCCGCC  | TTTCGTTT  |
| 4    | CCCCGGC  | GCGCGCG | TGTCGATG | CGTCGTCG | ATTCGAAA | GCGCGCG | TGGCGATG | CGCCGCC  | AAACGTTT  |
| 5    | GGCCGGG  | CGCCGCC | CATCGCCA | CGACGCC  | TTTCGAAT | CGCCGCC | CATCGACA | CGCCGCC  | ATTCGAAA  |
| 6    | CCCCGGG  | CGCCGCC | TGGCGATG | CGCCGTCG | AATCGAAA | GCGCGCG | TGTCGATG | CGCCGCC  | TTTCGAAT  |
| 7    | AAACGTTT | GCGCGCG | CATCGTCG | CGACGCG  | TTTCGATT | CGCCGCC | CATCGTCG | GCGCGCC  | AAACGAAT  |
| 8    | GCCCGCC  | CGCCGCC | CGACGATG | CGCCGTCG | AAACGTTT | CGCCGCC | CGACGATG | GCGCGCC  | ATTCGTTT  |
| 9    | GGCCGGC  | CGCCGCC | CAACGCCA | CGCCGACG | ATTCGAAT | CGCCGCC | CAACGCCA | GCGCGCG  | AAATCGAAA |
| 10   | AGGCGGG  | CGCCGCC | TGGCGTTG | CGTCGCG  | AATCGATT | CGCCGCC | TGGCGTTG | CGCCGCC  | TTTCGATT  |
| 11   | CCCCGCT  | CGCCGCC | CAACGACA | CGCCGACG | AAACGAAT | CGCCGCC | CAACGACA | CGCCGCC  | ATTCGAAT  |
| 12   | CCCCGGG  | GCCCGCC | TGTCGTTG | CGTCGCG  | ATTCGTTT | GCCCGCC | TGTCGTTG | CGCCGCC  | AAGCGAAA  |
| 13   | GCCCGGG  | CGCCGAC | CGACGAGA | CGCCGCG  | AATCGAAT | GCGCGCG | CATCGATG | CGCCGCC  | TTTCGTTT  |
| 14   | CAGCGTG  | CGTCGCG | TCTCGTCG | GCGCGCG  | ATTCGATT | CGCCGAC | CTTCGTCA | CGCCGCC  | AAACGATT  |
| 15   | CCACGCT  | CGACGCC | CACCGCCA | CGCCGCC  | AATCGATA | CGTCGCG | TGACGAAG | GCCCGCG  | AATCGTTT  |
| 16   | CCCCGCAG | CGCCGTC | TGGCGGTG | CGCCGCC  | TATCGATT | CGCCGCC | CTTCGAGA | CCCCGCC  | GAACGAAA  |
| 17   | CTGCGGG  | CGCCGAC | CCTCGTCG | GCGCGCG  | AAACGATT | TGCCGCC | TCTCGAAG | GCGCGCG  | TTTCGTTT  |
| 18   | CCCCGAG  | CGTCGCC | CGACGAG  | CGCCGCC  | AATCGTTT | CGCCGCC | CAGCGCCA | CGCCGCC  | CAACGAAA  |
| 19   | CCTCGGG  | CGACGCC | CGACGAAG | GCGCGCG  | AAGCGAAA | TGGCGCG | TGGCGCTG | TGGCGCG  | TTTCGTTT  |
| 20   | AAACGAAA | CGCCGTC | CTTCGTCA | CGCCGCC  | TTTCGTTT | GCGCGCG | CGACGAAG | GCGCGCG  | AATCGAAT  |
