# Supplementary material for: Abundant CpG-sequences in human genomes inhibit KIR3DL2-expressing NK cells
Source: PeerJ journal article supplement (doi:10.7717/peerj.12258), 2021-11-05

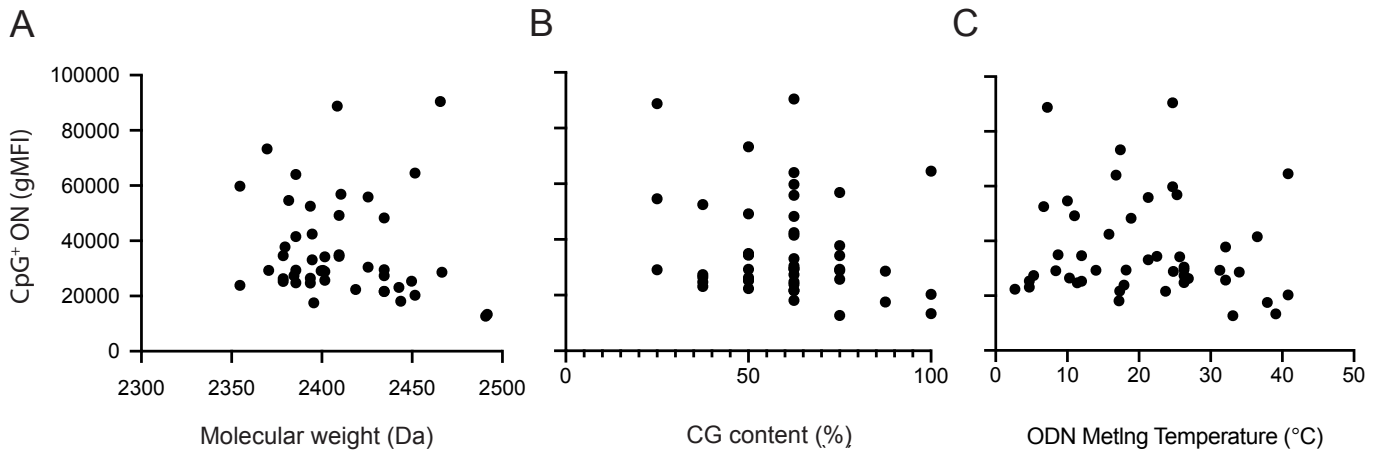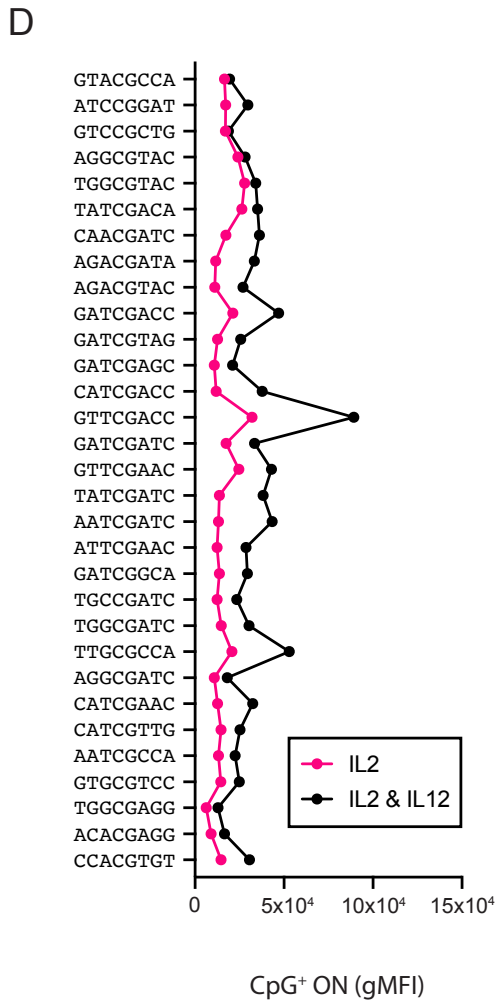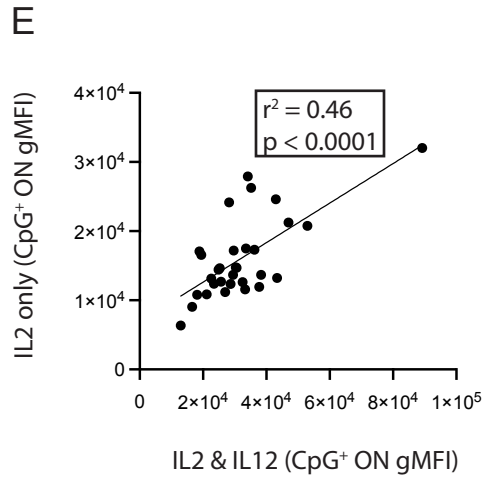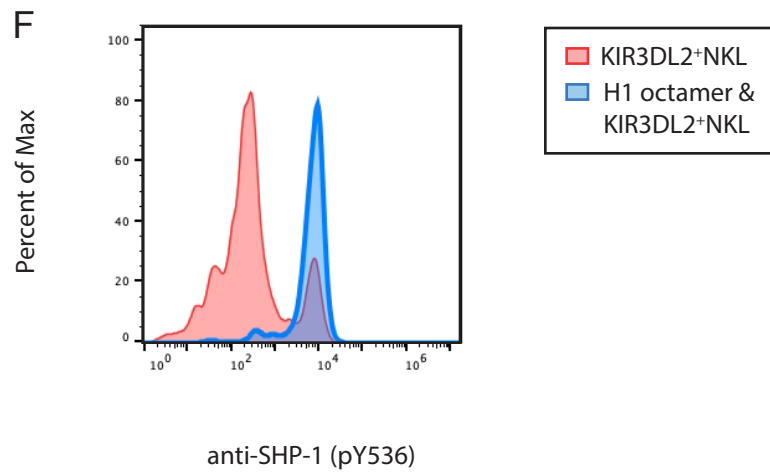

Supplement: Supp_data_4_PJ.pdf [file Supp_data_4_PJ.pdf]
