# Supplementary material for: Abundant CpG-sequences in human genomes inhibit KIR3DL2-expressing NK cells
Source: PeerJ. 2021 Nov 5;9:e12258. doi: 10.7717/peerj.12258 (PMC8574216; doi:10.7717/peerj.12258)
Supplement: Supplemental Information 5 — (Tab 1) Genomic data references, descriptions, and the datasets in which they were included. (Tab 2) Raw and adjusted data for CpG octamers in each genomic dataset. (Tabs 3-7) Raw data comprising each main figure. [file peerj-09-12258-s005.xlsx]

## Sheet: Genomic_Data_Used
Data Set	Reference Number	Description
Human	GCF_000001405.39	GRCh38
All Bacteria (B)	>NC_013791	2 Bacillus pseudofirmus OF4, complete sequence
All Bacteria (B)	>NC_013792	1 Bacillus pseudofirmus OF4 plasmid pBpOF4-01, complete sequence
All Bacteria (B)	>NC_013793	1 Bacillus pseudofirmus OF4 plasmid pBpOF4-02, complete sequence
All Bacteria (B)	>NC_000913	3 Escherichia coli str	K-12 substr	MG1655, complete genome
All Bacteria (B)	>NC_007164	1 Corynebacterium jeikeium K411, complete sequence
All Bacteria (B)	>NC_003080	1 Corynebacterium jeikeium K411 plasmid pKW4, complete sequence
All Bacteria (B)	>NC_002162	1 Ureaplasma parvum serovar 3 str	ATCC 700970, complete genome
All Bacteria (B)	>NC_004088	1 Yersinia pestis KIM10+, complete sequence
All Bacteria (B)	>NC_004838	1 Yersinia pestis KIM10+ plasmid pMT-1, complete sequence
All Bacteria (B)	>NC_002620	2 Chlamydia muridarum str	Nigg, complete sequence
All Bacteria (B)	>NC_002182	1 Chlamydia muridarum str	Nigg plasmid pMoPn, complete sequence
All Bacteria (B)	>NC_002488	3 Xylella fastidiosa 9a5c, complete genome
All Bacteria (B)	>NC_002489	3 Xylella fastidiosa 9a5c plasmid pXF1	3, complete sequence
All Bacteria (B)	>NC_002490	1 Xylella fastidiosa 9a5c plasmid pXF51, complete sequence
All Bacteria (B)	>NC_002505	1 Vibrio cholerae O1 biovar El Tor str	N16961 chromosome I, complete sequence
All Bacteria (B)	>NC_002506	1 Vibrio cholerae O1 biovar El Tor str	N16961 chromosome II, complete sequence
All Bacteria (B)	>NC_002516	2 Pseudomonas aeruginosa PAO1, complete genome
All Bacteria (B)	>NC_002737	2 Streptococcus pyogenes M1 GAS, complete genome
All Bacteria (B)	>NC_002663	1 Pasteurella multocida subsp	multocida str	Pm70, complete sequence
All Bacteria (B)	>NC_002946	2 Neisseria gonorrhoeae FA 1090 chromosome, complete genome
All Bacteria (B)	>NC_002662	1 Lactococcus lactis subsp	lactis Il1403 chromosome, complete genome
All Bacteria (B)	>NC_003028	3 Streptococcus pneumoniae TIGR4, complete genome
All Bacteria (B)	>NC_002696	2 Caulobacter crescentus CB15 chromosome, complete genome
All Bacteria (B)	>NC_004337	2 Shigella flexneri 2a str	301 chromosome, complete genome
All Bacteria (B)	>NC_004851	1 Shigella flexneri 2a str	301 plasmid pCP301, complete sequence
All Bacteria (B)	>NC_003197	2 Salmonella enterica subsp	enterica serovar Typhimurium str	LT2, complete genome
All Bacteria (B)	>NC_003277	2 Salmonella enterica subsp	enterica serovar Typhimurium str	LT2 plasmid pSLT, complete sequence
All Bacteria (B)	>NC_003047	1 Sinorhizobium meliloti 1021 chromosome, complete genome
All Bacteria (B)	>NC_003037	1 Sinorhizobium meliloti 1021 plasmid pSymA, complete sequence
All Bacteria (B)	>NC_003078	1 Sinorhizobium meliloti 1021 plasmid pSymB, complete sequence
All Bacteria (B)	>NC_002932	3 Chlorobium tepidum TLS chromosome, complete genome
All Bacteria (B)	>NC_003103	1 Rickettsia conorii str	Malish 7, complete sequence
All Bacteria (B)	>NC_003098	1 Streptococcus pneumoniae R6 chromosome, complete genome
All Bacteria (B)	>NC_003869	1 Caldanaerobacter subterraneus subsp	tengcongensis MB4, complete sequence
All Bacteria (B)	>NC_006526	2 Zymomonas mobilis subsp	mobilis ZM4 = ATCC 31821, complete sequence
All Bacteria (B)	>NC_003317	1 Brucella melitensis bv	1 str	16M chromosome I, complete sequence
All Bacteria (B)	>NC_003318	1 Brucella melitensis bv	1 str	16M chromosome II, complete sequence
All Bacteria (B)	>NC_003902	1 Xanthomonas campestris pv	campestris str	ATCC 33913 chromosome, complete genome
All Bacteria (B)	>NC_003919	1 Xanthomonas citri pv	citri str	306, complete sequence
All Bacteria (B)	>NC_003921	3 Xanthomonas citri pv	citri str	306 plasmid pXAC33, complete sequence
All Bacteria (B)	>NC_003922	1 Xanthomonas citri pv	citri str	306 plasmid pXAC64, complete sequence
All Bacteria (B)	>NC_005043	1 Chlamydia pneumoniae TW-183, complete sequence
All Bacteria (B)	>NC_004556	1 Xylella fastidiosa Temecula1, complete genome
All Bacteria (B)	>NC_004554	1 Xylella fastidiosa Temecula1 plasmid pXFPD1	3, complete sequence
All Bacteria (B)	>NC_004116	1 Streptococcus agalactiae 2603V/R chromosome, complete genome
All Bacteria (B)	>NC_003485	1 Streptococcus pyogenes MGAS8232, complete sequence
All Bacteria (B)	>NC_003454	1 Fusobacterium nucleatum subsp	nucleatum ATCC 25586 chromosome, complete genome
All Bacteria (B)	>NC_004061	1 Buchnera aphidicola str	Sg (Schizaphis graminum), complete sequence
All Bacteria (B)	>NC_006834	1 Xanthomonas oryzae pv	oryzae KACC 10331, complete genome
All Bacteria (B)	>NC_004741	1 Shigella flexneri 2a str	2457T, complete sequence
All Bacteria (B)	>NC_004070	1 Streptococcus pyogenes MGAS315, complete genome
All Bacteria (B)	>NC_004431	1 Escherichia coli CFT073, complete sequence
All Bacteria (B)	>NC_004350	2 Streptococcus mutans UA159 chromosome, complete genome
All Bacteria (B)	>NC_004572	3 Tropheryma whipplei str	Twist, complete genome
All Bacteria (B)	>NC_004310	3 Brucella suis 1330 chromosome I, complete sequence
All Bacteria (B)	>NC_004311	2 Brucella suis 1330 chromosome II, complete sequence
All Bacteria (B)	>NC_004307	2 Bifidobacterium longum NCC2705 chromosome, complete genome
All Bacteria (B)	>NC_004943	1 Bifidobacterium longum NCC2705 plasmid pBLO1, complete sequence
All Bacteria (B)	>NC_004631	1 Salmonella enterica subsp	enterica serovar Typhi str	Ty2, complete sequence
All Bacteria (B)	>NC_002947	4 Pseudomonas putida KT2440 chromosome, complete genome
All Bacteria (B)	>NC_002950	2 Porphyromonas gingivalis W83, complete sequence
All Bacteria (B)	>NC_003361	3 Chlamydia caviae GPIC, complete sequence
All Bacteria (B)	>NC_004720	1 Chlamydia caviae GPIC plasmid pCpGP1, complete sequence
All Bacteria (B)	>NC_004557	1 Clostridium tetani E88, complete genome
All Bacteria (B)	>NC_004565	1 Clostridium tetani E88 plasmid pE88, complete sequence
All Bacteria (B)	>NC_004461	1 Staphylococcus epidermidis ATCC 12228 chromosome, complete genome
All Bacteria (B)	>NC_005008	1 Staphylococcus epidermidis ATCC 12228 plasmid pSE-12228-01, complete sequence
All Bacteria (B)	>NC_005007	1 Staphylococcus epidermidis ATCC 12228 plasmid pSE-12228-02, complete sequence
All Bacteria (B)	>NC_005006	1 Staphylococcus epidermidis ATCC 12228 plasmid pSE-12228-03, complete sequence
All Bacteria (B)	>NC_005005	1 Staphylococcus epidermidis ATCC 12228 plasmid pSE-12228-04, complete sequence
All Bacteria (B)	>NC_005004	1 Staphylococcus epidermidis ATCC 12228 plasmid pSE-12228-05, complete sequence
All Bacteria (B)	>NC_005003	1 Staphylococcus epidermidis ATCC 12228 plasmid pSE-12228-06, complete sequence
All Bacteria (B)	>NC_006087	1 Leifsonia xyli subsp	xyli str	CTCB07, complete genome
All Bacteria (B)	>NC_005823	1 Leptospira interrogans serovar Copenhageni str	Fiocruz L1-130 chromosome I, complete sequence
All Bacteria (B)	>NC_005824	1 Leptospira interrogans serovar Copenhageni str	Fiocruz L1-130 chromosome II, complete sequence
All Bacteria (B)	>NC_005085	1 Chromobacterium violaceum ATCC 12472, complete sequence
All Bacteria (B)	>NC_004545	1 Buchnera aphidicola str	Bp (Baizongia pistaciae), complete genome
All Bacteria (B)	>NC_004555	1 Buchnera aphidicola str	Bp (Baizongia pistaciae) plasmid pBBp1, complete sequence
All Bacteria (B)	>NC_006300	1 [Mannheimia] succiniciproducens MBEL55E, complete sequence
All Bacteria (B)	>NC_002971	4 Coxiella burnetii RSA 493, complete genome
All Bacteria (B)	>NC_004704	2 Coxiella burnetii RSA 493 plasmid pQpH1, complete sequence
All Bacteria (B)	>NC_004668	1 Enterococcus faecalis V583 chromosome, complete genome
All Bacteria (B)	>NC_004669	1 Enterococcus faecalis V583 plasmid pTEF1, complete sequence
All Bacteria (B)	>NC_004671	1 Enterococcus faecalis V583 plasmid pTEF2, complete sequence
All Bacteria (B)	>NC_004670	1 Enterococcus faecalis V583 plasmid pTEF3, complete sequence
All Bacteria (B)	>NC_004578	1 [Pseudomonas syringae] pv	tomato str	DC3000 chromosome, complete genome
All Bacteria (B)	>NC_004633	1 [Pseudomonas syringae] pv	tomato str	DC3000 plasmid pDC3000A, complete sequence
All Bacteria (B)	>NC_004632	1 [Pseudomonas syringae] pv	tomato str	DC3000 plasmid pDC3000B, complete sequence
All Bacteria (B)	>NC_004722	1 Bacillus cereus ATCC 14579 chromosome, complete genome
All Bacteria (B)	>NC_004721	2 Bacillus cereus ATCC 14579 plasmid pBClin15, complete sequence
All Bacteria (B)	>NC_003997	3 Bacillus anthracis str	Ames chromosome, complete genome
All Bacteria (B)	>NC_002944	2 Mycobacterium avium subsp	paratuberculosis K-10, complete sequence
All Bacteria (B)	>NC_005810	1 Yersinia pestis biovar Microtus str	91001, complete genome
All Bacteria (B)	>NC_005813	1 Yersinia pestis biovar Microtus str	91001 plasmid pCD1, complete sequence
All Bacteria (B)	>NC_005814	1 Yersinia pestis biovar Microtus str	91001 plasmid pCRY, complete sequence
All Bacteria (B)	>NC_005815	1 Yersinia pestis biovar Microtus str	91001 plasmid pMT1, complete sequence
All Bacteria (B)	>NC_005816	1 Yersinia pestis biovar Microtus str	91001 plasmid pPCP1, complete sequence
All Bacteria (B)	>NC_004917	1 Helicobacter hepaticus ATCC 51449, complete sequence
All Bacteria (B)	>NC_005042	1 Prochlorococcus marinus subsp	marinus str	CCMP1375 complete genome
All Bacteria (B)	>NC_002940	2 [Haemophilus] ducreyi 35000HP, complete sequence
All Bacteria (B)	>NC_002939	5 Geobacter sulfurreducens PCA chromosome, complete genome
All Bacteria (B)	>NC_003909	8 Bacillus cereus ATCC 10987, complete sequence
All Bacteria (B)	>NC_005707	1 Bacillus cereus ATCC 10987 plasmid pBc10987, complete sequence
All Bacteria (B)	>NC_002978	6 Wolbachia endosymbiont of Drosophila melanogaster, complete genome
All Bacteria (B)	>NC_006142	1 Rickettsia typhi str	Wilmington, complete genome
All Bacteria (B)	>NC_005362	1 Lactobacillus johnsonii NCC 533, complete genome
All Bacteria (B)	>NC_006905	1 Salmonella enterica subsp	enterica serovar Choleraesuis str	SC-B67, complete genome
All Bacteria (B)	>NC_006856	1 Salmonella enterica subsp	enterica serovar Choleraesuis str	SC-B67 plasmid pSC138, complete sequence
All Bacteria (B)	>NC_006855	1 Salmonella enterica subsp	enterica serovar Choleraesuis str	SC-B67 plasmid pSCV50, complete sequence
All Bacteria (B)	>NC_005835	1 Thermus thermophilus HB27, complete sequence
All Bacteria (B)	>NC_005838	1 Thermus thermophilus HB27 plasmid pTT27, complete sequence
All Bacteria (B)	>NC_006932	1 Brucella abortus bv	1 str	9-941 chromosome I, complete sequence
All Bacteria (B)	>NC_006933	1 Brucella abortus bv	1 str	9-941 chromosome II, complete sequence
All Bacteria (B)	>NC_005945	1 Bacillus anthracis str	Sterne chromosome, complete genome
All Bacteria (B)	>NC_002967	9 Treponema denticola ATCC 35405 chromosome, complete genome
All Bacteria (B)	>NC_007295	1 Mycoplasma hyopneumoniae J, complete genome
All Bacteria (B)	>NC_007332	1 Mycoplasma hyopneumoniae 7448, complete genome
All Bacteria (B)	>NC_007294	1 Mycoplasma synoviae 53, complete genome
All Bacteria (B)	>NC_002973	6 Listeria monocytogenes serotype 4b str	F2365, complete sequence
All Bacteria (B)	>NC_006055	1 Mesoplasma florum L1 chromosome, complete genome
All Bacteria (B)	>NC_002977	6 Methylococcus capsulatus str	Bath, complete genome
All Bacteria (B)	>NC_006085	1 Cutibacterium acnes KPA171202, complete sequence
All Bacteria (B)	>NC_006908	1 Mycoplasma mobile 163K complete genome
All Bacteria (B)	>NC_006833	1 Wolbachia endosymbiont strain TRS of Brugia malayi, complete sequence
All Bacteria (B)	>NC_006360	1 Mycoplasma hyopneumoniae 232, complete genome
All Bacteria (B)	>NC_006322	1 Bacillus licheniformis DSM 13 = ATCC 14580, complete genome
All Bacteria (B)	>NC_007530	2 Bacillus anthracis str	'Ames Ancestor', complete genome
All Bacteria (B)	>NC_007322	2 Bacillus anthracis str	'Ames Ancestor' plasmid pXO1, complete sequence
All Bacteria (B)	>NC_007323	3 Bacillus anthracis str	'Ames Ancestor' plasmid pXO2, complete sequence
All Bacteria (B)	>NC_006512	1 Idiomarina loihiensis L2TR, complete genome
All Bacteria (B)	>NC_002942	5 Legionella pneumophila subsp	pneumophila str	Philadelphia 1 chromosome, complete genome
All Bacteria (B)	>NC_005957	1 [Bacillus thuringiensis] serovar konkukian str	97-27 chromosome, complete genome
All Bacteria (B)	>NC_006578	1 [Bacillus thuringiensis] serovar konkukian str	97-27 plasmid pBT9727, complete sequence
All Bacteria (B)	>NC_000915	1 Helicobacter pylori 26695 chromosome, complete genome
All Bacteria (B)	>NC_000853	1 Thermotoga maritima MSB8 chromosome, complete genome
All Bacteria (B)	>NC_001263	1 Deinococcus radiodurans R1 chromosome 1, complete sequence
All Bacteria (B)	>NC_001264	1 Deinococcus radiodurans R1 chromosome 2, complete sequence
All Bacteria (B)	>NC_000959	1 Deinococcus radiodurans R1 plasmid CP1, complete sequence
All Bacteria (B)	>NC_000958	1 Deinococcus radiodurans R1 plasmid MP1, complete sequence
All Bacteria (B)	>NC_002755	2 Mycobacterium tuberculosis CDC1551, complete sequence
All Bacteria (B)	>NC_000919	1 Treponema pallidum subsp	pallidum str	Nichols, complete sequence
All Bacteria (B)	>NC_000918	1 Aquifex aeolicus VF5 chromosome, complete genome
All Bacteria (B)	>NC_001880	1 Aquifex aeolicus VF5 plasmid ece1, complete sequence
All Bacteria (B)	>NC_001318	1 Borrelia burgdorferi B31 chromosome, complete genome
All Bacteria (B)	>NC_001903	1 Borrelia burgdorferi B31 plasmid cp26, complete sequence
All Bacteria (B)	>NC_000948	1 Borrelia burgdorferi B31 plasmid cp32-1, complete sequence
All Bacteria (B)	>NC_000949	1 Borrelia burgdorferi B31 plasmid cp32-3, complete sequence
All Bacteria (B)	>NC_000950	1 Borrelia burgdorferi B31 plasmid cp32-4, complete sequence
All Bacteria (B)	>NC_000951	1 Borrelia burgdorferi B31 plasmid cp32-6, complete sequence
All Bacteria (B)	>NC_000952	1 Borrelia burgdorferi B31 plasmid cp32-7, complete sequence
All Bacteria (B)	>NC_000953	1 Borrelia burgdorferi B31 plasmid cp32-8, complete sequence
All Bacteria (B)	>NC_000954	1 Borrelia burgdorferi B31 plasmid cp32-9, complete sequence
All Bacteria (B)	>NC_001904	1 Borrelia burgdorferi B31 plasmid cp9, complete sequence
All Bacteria (B)	>NC_001849	2 Borrelia burgdorferi B31 plasmid lp17, complete sequence
All Bacteria (B)	>NC_000955	2 Borrelia burgdorferi B31 plasmid lp21, complete sequence
All Bacteria (B)	>NC_001850	1 Borrelia burgdorferi B31 plasmid lp25, complete sequence
All Bacteria (B)	>NC_001851	2 Borrelia burgdorferi B31 plasmid lp28-1, complete sequence
All Bacteria (B)	>NC_001852	1 Borrelia burgdorferi B31 plasmid lp28-2, complete sequence
All Bacteria (B)	>NC_001853	1 Borrelia burgdorferi B31 plasmid lp28-3, complete sequence
All Bacteria (B)	>NC_001854	1 Borrelia burgdorferi B31 plasmid lp28-4, complete sequence
All Bacteria (B)	>NC_001855	1 Borrelia burgdorferi B31 plasmid lp36, complete sequence
All Bacteria (B)	>NC_001856	1 Borrelia burgdorferi B31 plasmid lp38, complete sequence
All Bacteria (B)	>NC_000957	1 Borrelia burgdorferi B31 plasmid lp5, complete sequence
All Bacteria (B)	>NC_001857	2 Borrelia burgdorferi B31 plasmid lp54, complete sequence
All Bacteria (B)	>NC_000956	1 Borrelia burgdorferi B31 plasmid lp56, complete sequence
All Bacteria (B)	>NC_000117	1 Chlamydia trachomatis D/UW-3/CX chromosome, complete genome
All Bacteria (B)	>NC_000922	1 Chlamydophila pneumoniae CWL029 chromosome, complete genome
All Bacteria (B)	>NC_003030	1 Clostridium acetobutylicum ATCC 824 chromosome, complete genome
All Bacteria (B)	>NC_001988	2 Clostridium acetobutylicum ATCC 824 plasmid pSOL1, complete sequence
All Bacteria (B)	>NC_000921	1 Helicobacter pylori J99, complete sequence
All Bacteria (B)	>NC_003112	2 Neisseria meningitidis MC58 chromosome, complete genome
All Bacteria (B)	>NC_002695	2 Escherichia coli O157:H7 str	Sakai DNA, complete genome
All Bacteria (B)	>NC_002128	1 Escherichia coli O157:H7 str	Sakai plasmid pO157, complete sequence
All Bacteria (B)	>NC_002127	1 Escherichia coli O157:H7 str	Sakai plasmid pOSAK1, complete sequence
All Bacteria (B)	>NC_004344	2 Wigglesworthia glossinidia endosymbiont of Glossina brevipalpis DNA, complete genome
All Bacteria (B)	>NC_003425	1 Wigglesworthia glossinidia endosymbiont of Glossina brevipalpis plasmid pWb1 DNA, complete sequence
All Bacteria (B)	>NC_007929	1 Lactobacillus salivarius UCC118 chromosome, complete genome
All Bacteria (B)	>NC_007930	1 Lactobacillus salivarius UCC118 plasmid pMP118, complete sequence
All Bacteria (B)	>NC_006529	1 Lactobacillus salivarius UCC118 plasmid pSF118-20, complete sequence
All Bacteria (B)	>NC_006530	1 Lactobacillus salivarius UCC118 plasmid pSF118-44, complete sequence
All Bacteria (B)	>NC_010816	1 Bifidobacterium longum DJO10A, complete genome
All Bacteria (B)	>NC_004252	1 Bifidobacterium longum DJO10A plasmid pDOJH10L, complete sequence
All Bacteria (B)	>NC_004253	1 Bifidobacterium longum DJO10A plasmid pDOJH10S, complete sequence
All Bacteria (B)	>NC_006570	2 Francisella tularensis subsp	tularensis SCHU S4 chromosome, complete genome
All Bacteria (B)	>NC_007622	1 Staphylococcus aureus RF122, complete sequence
All Bacteria (B)	>NC_007356	1 Dehalococcoides mccartyi CBDB1, complete sequence
All Bacteria (B)	>NC_000964	3 Bacillus subtilis subsp	subtilis str	168 complete genome
All Bacteria (B)	>NC_003143	1 Yersinia pestis CO92 chromosome, complete genome
All Bacteria (B)	>NC_003131	1 Yersinia pestis CO92 plasmid pCD1, complete sequence
All Bacteria (B)	>NC_003134	1 Yersinia pestis CO92 plasmid pMT1, complete sequence
All Bacteria (B)	>NC_003132	1 Yersinia pestis CO92 plasmid pPCP1, complete sequence
All Bacteria (B)	>NC_002163	1 Campylobacter jejuni subsp	jejuni NCTC 11168 = ATCC 700819 chromosome, complete genome
All Bacteria (B)	>NC_003116	1 Neisseria meningitidis Z2491, complete sequence
All Bacteria (B)	>NC_003295	1 Ralstonia solanacearum GMI1000 chromosome complete sequence
All Bacteria (B)	>NC_003296	1 Ralstonia solanacearum GMI1000 megaplasmid complete sequence
All Bacteria (B)	>NC_004757	1 Nitrosomonas europaea ATCC 19718, complete sequence
All Bacteria (B)	>NC_007508	1 Xanthomonas campestris pv	vesicatoria str	85-10, complete sequence
All Bacteria (B)	>NC_007507	1 Xanthomonas campestris pv	vesicatoria str	85-10 plasmid pXCV183, complete sequence
All Bacteria (B)	>NC_007505	1 Xanthomonas campestris pv	vesicatoria str	85-10 plasmid pXCV19, complete sequence
All Bacteria (B)	>NC_007504	1 Xanthomonas campestris pv	vesicatoria str	85-10 plasmid pXCV2, complete sequence
All Bacteria (B)	>NC_007506	1 Xanthomonas campestris pv	vesicatoria str	85-10 plasmid pXCV38, complete sequence
All Bacteria (B)	>NC_009089	1 Clostridioides difficile 630, complete genome
All Bacteria (B)	>NC_008226	2 Clostrididioides difficile 630 plasmid pCD630, complete replicon
All Bacteria (B)	>NC_012660	1 Pseudomonas fluorescens SBW25, complete sequence
All Bacteria (B)	>NC_007880	1 Francisella tularensis subsp	holarctica LVS complete genome
All Bacteria (B)	>NC_008380	1 Rhizobium leguminosarum bv	viciae 3841, complete sequence
All Bacteria (B)	>NC_008381	1 Rhizobium leguminosarum bv	viciae 3841 plasmid pRL10, complete sequence
All Bacteria (B)	>NC_008384	1 Rhizobium leguminosarum bv	viciae 3841 plasmid pRL11, complete sequence
All Bacteria (B)	>NC_008378	1 Rhizobium leguminosarum bv	viciae 3841 unnamed plasmid, complete sequence
All Bacteria (B)	>NC_008382	1 Rhizobium leguminosarum bv	viciae 3841 plasmid pRL7, complete sequence
All Bacteria (B)	>NC_008383	1 Rhizobium leguminosarum bv	viciae 3841 plasmid pRL8, complete sequence
All Bacteria (B)	>NC_008379	1 Rhizobium leguminosarum bv	viciae 3841 plasmid pRL9, complete sequence
All Bacteria (B)	>NC_008313	1 Cupriavidus necator H16 chromosome 1, complete sequence
All Bacteria (B)	>NC_008314	1 Cupriavidus necator H16 chromosome 2, complete sequence
All Bacteria (B)	>NC_005241	1 Cupriavidus necator H16 megaplasmid pHG1, complete sequence
All Bacteria (B)	>NC_008229	1 Helicobacter acinonychis str	Sheeba, complete sequence
All Bacteria (B)	>NC_008230	1 Helicobacter acinonychis str	Sheeba plasmid pHac1, complete sequence
All Bacteria (B)	>NC_008245	1 Francisella tularensis subsp	tularensis FSC198, complete sequence
All Bacteria (B)	>NC_008800	1 Yersinia enterocolitica subsp	enterocolitica 8081 chromosome, complete genome
All Bacteria (B)	>NC_008791	1 Yersinia enterocolitica subsp	enterocolitica 8081 plasmid pYVe8081, complete sequence
All Bacteria (B)	>NC_008260	1 Alcanivorax borkumensis SK2, complete sequence
All Bacteria (B)	>NC_009332	1 Streptococcus pyogenes str	Manfredo, complete sequence
All Bacteria (B)	>NC_012121	1 Staphylococcus carnosus subsp	carnosus TM300, complete sequence
All Bacteria (B)	>NC_009004	1 Lactococcus lactis subsp	cremoris MG1363, complete sequence
All Bacteria (B)	>NC_008769	1 Mycobacterium tuberculosis variant bovis BCG str	Pasteur 1173P2, complete sequence
All Bacteria (B)	>NC_008767	1 Neisseria meningitidis FAM18, complete sequence
All Bacteria (B)	>NC_011000	1 Burkholderia cenocepacia J2315 chromosome 1, complete sequence
All Bacteria (B)	>NC_011001	1 Burkholderia cenocepacia J2315 chromosome 2, complete sequence
All Bacteria (B)	>NC_011002	1 Burkholderia cenocepacia J2315 chromosome 3, complete sequence
All Bacteria (B)	>NC_011003	1 Burkholderia cenocepacia J2315 plasmid pBCJ2315, complete sequence
All Bacteria (B)	>NC_011294	1 Salmonella enterica subsp	enterica serovar Enteritidis str	P125109, complete sequence
All Bacteria (B)	>NC_011274	1 Salmonella enterica subsp	enterica serovar Gallinarum str	287/91, complete sequence
All Bacteria (B)	>NC_012004	1 Streptococcus uberis 0140J complete genome
All Bacteria (B)	>NC_012892	2 Escherichia coli BL21(DE3), complete genome
All Bacteria (B)	>NC_017333	1 Staphylococcus aureus subsp	aureus ST398, complete sequence
All Bacteria (B)	>NC_017334	1 Staphylococcus aureus subsp	aureus ST398 plasmid pS0385-1, complete sequence
All Bacteria (B)	>NC_017335	1 Staphylococcus aureus subsp	aureus ST398 plasmid pS0385-2, complete sequence
All Bacteria (B)	>NC_017336	1 Staphylococcus aureus subsp	aureus ST398 plasmid pS0385-3, complete sequence
All Bacteria (B)	>NC_002528	1 Buchnera aphidicola str	APS (Acyrthosiphon pisum) chromosome, complete genome
All Bacteria (B)	>NC_002253	1 Buchnera aphidicola str	APS (Acyrthosiphon pisum) plasmid pLeu, complete sequence
All Bacteria (B)	>NC_002252	1 Buchnera aphidicola str	APS (Acyrthosiphon pisum) plasmid pTrp, complete sequence
All Bacteria (B)	>NC_002678	2 Mesorhizobium japonicum MAFF 303099, complete sequence
All Bacteria (B)	>NC_002679	1 Mesorhizobium japonicum MAFF 303099 plasmid pMLa, complete sequence
All Bacteria (B)	>NC_002682	1 Mesorhizobium japonicum MAFF 303099 plasmid pMLb, complete sequence
All Bacteria (B)	>NC_002745	2 Staphylococcus aureus subsp	aureus N315, complete sequence
All Bacteria (B)	>NC_003140	1 Staphylococcus aureus subsp	aureus N315 plasmid pN315, complete sequence
All Bacteria (B)	>NC_002758	2 Staphylococcus aureus subsp	aureus Mu50, complete sequence
All Bacteria (B)	>NC_002774	1 Staphylococcus aureus subsp	aureus Mu50 plasmid VRSAp, complete sequence
All Bacteria (B)	>NC_003366	1 Clostridium perfringens str	13, complete sequence
All Bacteria (B)	>NC_003042	1 Clostridium perfringens str	13 plasmid pCP13, complete sequence
All Bacteria (B)	>NC_003272	1 Nostoc sp	PCC 7120, complete sequence
All Bacteria (B)	>NC_003276	1 Nostoc sp	PCC 7120 plasmid pCC7120alpha, complete sequence
All Bacteria (B)	>NC_003240	1 Nostoc sp	PCC 7120 plasmid pCC7120beta, complete sequence
All Bacteria (B)	>NC_003273	1 Nostoc sp	PCC 7120 plasmid pCC7120delta, complete sequence
All Bacteria (B)	>NC_003270	1 Nostoc sp	PCC 7120 plasmid pCC7120epsilon, complete sequence
All Bacteria (B)	>NC_003267	1 Nostoc sp	PCC 7120 plasmid pCC7120gamma, complete sequence
All Bacteria (B)	>NC_003241	1 Nostoc sp	PCC 7120 plasmid pCC7120zeta, complete sequence
All Bacteria (B)	>NC_000911	1 Synechocystis sp	PCC 6803, complete sequence
All Bacteria (B)	>NC_005230	1 Synechocystis sp	PCC 6803 plasmid pSYSA, complete sequence
All Bacteria (B)	>NC_005231	1 Synechocystis sp	PCC 6803 plasmid pSYSG, complete sequence
All Bacteria (B)	>NC_005229	1 Synechocystis sp	PCC 6803 plasmid pSYSM, complete sequence
All Bacteria (B)	>NC_005232	1 Synechocystis sp	PCC 6803 plasmid pSYSX, complete sequence
All Bacteria (B)	>NC_005139	1 Vibrio vulnificus YJ016 DNA, chromosome I, complete sequence
All Bacteria (B)	>NC_005140	1 Vibrio vulnificus YJ016 DNA, chromosome II, complete sequence
All Bacteria (B)	>NC_005128	1 Vibrio vulnificus YJ016 plasmid pYJ016 DNA, complete genome
All Bacteria (B)	>NC_003155	5 Streptomyces avermitilis MA-4680 = NBRC 14893 DNA, complete genome
All Bacteria (B)	>NC_004719	1 Streptomyces avermitilis MA-4680 = NBRC 14893 plasmid SAP1 DNA, complete sequence
All Bacteria (B)	>NC_006510	1 Geobacillus kaustophilus HTA426, complete sequence
All Bacteria (B)	>NC_006509	1 Geobacillus kaustophilus HTA426 plasmid pHTA426, complete sequence
All Bacteria (B)	>NC_006361	1 Nocardia farcinica IFM 10152, complete sequence
All Bacteria (B)	>NC_006362	1 Nocardia farcinica IFM 10152 plasmid pNF1, complete sequence
All Bacteria (B)	>NC_006363	1 Nocardia farcinica IFM 10152 plasmid pNF2, complete sequence
All Bacteria (B)	>NC_006582	1 Bacillus clausii KSM-K16, complete sequence
All Bacteria (B)	>NC_007168	1 Staphylococcus haemolyticus JCSC1435, complete sequence
All Bacteria (B)	>NC_007169	1 Staphylococcus haemolyticus JCSC1435 plasmid pSHaeA, complete sequence
All Bacteria (B)	>NC_007170	1 Staphylococcus haemolyticus JCSC1435 plasmid pSHaeB, complete sequence
All Bacteria (B)	>NC_007171	1 Staphylococcus haemolyticus JCSC1435 plasmid pSHaeC, complete sequence
All Bacteria (B)	>NC_012731	1 Klebsiella pneumoniae subsp	pneumoniae NTUH-K2044, complete sequence
All Bacteria (B)	>NC_006625	1 Klebsiella pneumoniae subsp	pneumoniae NTUH-K2044 plasmid pK2044, complete sequence
All Bacteria (B)	>NC_006177	1 Symbiobacterium thermophilum IAM 14863, complete sequence
All Bacteria (B)	>NC_006347	1 Bacteroides fragilis YCH46 DNA, complete genome
All Bacteria (B)	>NC_006297	1 Bacteroides fragilis YCH46 plasmid pBFY46, complete sequence
All Bacteria (B)	>NC_007899	1 Chlamydia felis Fe/C-56, complete sequence
All Bacteria (B)	>NC_007900	1 Chlamydia felis Fe/C-56 plasmid pCfe1, complete sequence
All Bacteria (B)	>NC_007626	1 Magnetospirillum magneticum AMB-1, complete sequence
All Bacteria (B)	>NC_010609	1 Lactobacillus reuteri JCM 1112, complete sequence
All Bacteria (B)	>NC_007705	1 Xanthomonas oryzae pv	oryzae MAFF 311018 DNA, complete genome
All Bacteria (B)	>NC_007907	1 Desulfitobacterium hafniense Y51, complete sequence
All Bacteria (B)	>NC_006576	1 Synechococcus elongatus PCC 6301 DNA, complete genome
All Bacteria (B)	>NC_007712	1 Sodalis glossinidius str	'morsitans', complete sequence
All Bacteria (B)	>NC_007713	1 Sodalis glossinidius str	'morsitans' plasmid pSG1, complete sequence
All Bacteria (B)	>NC_007714	1 Sodalis glossinidius str	'morsitans' plasmid pSG2, complete sequence
All Bacteria (B)	>NC_007715	1 Sodalis glossinidius str	'morsitans' plasmid pSG3, complete sequence
All Bacteria (B)	>NC_012490	1 Rhodococcus erythropolis PR4, complete sequence
All Bacteria (B)	>NC_007486	1 Rhodococcus erythropolis PR4 plasmid pREC1, complete sequence
All Bacteria (B)	>NC_007487	1 Rhodococcus erythropolis PR4 plasmid pREC2, complete sequence
All Bacteria (B)	>NC_007491	1 Rhodococcus erythropolis PR4 plasmid pREL1, complete sequence
All Bacteria (B)	>NC_007350	1 Staphylococcus saprophyticus subsp	saprophyticus ATCC 15305 = NCTC 7292, complete sequence
All Bacteria (B)	>NC_007351	1 Staphylococcus saprophyticus subsp	saprophyticus ATCC 15305 = NCTC 7292 plasmid pSSP1, complete sequence
All Bacteria (B)	>NC_007352	1 Staphylococcus saprophyticus subsp	saprophyticus ATCC 15305 = NCTC 7292 plasmid pSSP2, complete sequence
All Bacteria (B)	>NC_010610	1 Lactobacillus fermentum IFO 3956, complete sequence
All Bacteria (B)	>NC_012491	1 Brevibacillus brevis NBRC 100599 DNA, complete genome
All Bacteria (B)	>NC_010376	1 Finegoldia magna ATCC 29328, complete sequence
All Bacteria (B)	>NC_010371	1 Finegoldia magna ATCC 29328 plasmid pFMC, complete sequence
All Bacteria (B)	>NC_010793	1 Orientia tsutsugamushi str	Ikeda, complete sequence
All Bacteria (B)	>NC_009342	1 Corynebacterium glutamicum R, complete sequence
All Bacteria (B)	>NC_009343	1 Corynebacterium glutamicum R plasmid pCGR1, complete sequence
All Bacteria (B)	>NC_007779	1 Escherichia coli str	K-12 substr	W3110 DNA, complete genome
All Bacteria (B)	>NC_011837	1 Clostridium kluyveri NBRC 12016 DNA, complete genome
All Bacteria (B)	>NC_011836	1 Clostridium kluyveri NBRC 12016 plasmid pCKL1 DNA, complete sequence, strain: NBRC 12016
All Bacteria (B)	>NC_010617	1 Kocuria rhizophila DC2201, complete sequence
All Bacteria (B)	>NC_012489	1 Gemmatimonas aurantiaca T-27 DNA, complete genome
All Bacteria (B)	>NC_009662	1 Nitratiruptor sp	SB155-2, complete sequence
All Bacteria (B)	>NC_009663	1 Sulfurovum sp	NBC37-1, complete sequence
All Bacteria (B)	>NC_008512	1 Candidatus Carsonella ruddii PV DNA, complete genome
All Bacteria (B)	>NC_011415	1 Escherichia coli SE11, complete sequence
All Bacteria (B)	>NC_011419	1 Escherichia coli SE11 plasmid pSE11-1, complete sequence
All Bacteria (B)	>NC_011413	1 Escherichia coli SE11 plasmid pSE11-2, complete sequence
All Bacteria (B)	>NC_011416	1 Escherichia coli SE11 plasmid pSE11-3, complete sequence
All Bacteria (B)	>NC_011407	1 Escherichia coli SE11 plasmid pSE11-4, complete sequence
All Bacteria (B)	>NC_011408	1 Escherichia coli SE11 plasmid pSE11-5, complete sequence
All Bacteria (B)	>NC_011411	1 Escherichia coli SE11 plasmid pSE11-6, complete sequence
All Bacteria (B)	>NC_009465	1 Candidatus Vesicomyosocius okutanii HA, complete sequence
All Bacteria (B)	>NC_008618	1 Bifidobacterium adolescentis ATCC 15703 DNA, complete genome
All Bacteria (B)	>NC_009782	1 Staphylococcus aureus subsp	aureus Mu3, complete sequence
All Bacteria (B)	>NC_009641	1 Staphylococcus aureus subsp	aureus str	Newman, complete sequence
All Bacteria (B)	>NC_013654	1 Escherichia coli SE15, complete sequence
All Bacteria (B)	>NC_013655	1 Escherichia coli SE15 plasmid pECSF1, complete sequence
All Bacteria (B)	>NC_010729	1 Porphyromonas gingivalis ATCC 33277, complete sequence
All Bacteria (B)	>NC_009937	1 Azorhizobium caulinodans ORS 571, complete sequence
All Bacteria (B)	>NC_010804	1 Burkholderia multivorans ATCC 17616 DNA, complete genome, chromosome 1
All Bacteria (B)	>NC_010805	1 Burkholderia multivorans ATCC 17616 genomic DNA, complete genome, chromosome 2
All Bacteria (B)	>NC_010801	1 Burkholderia multivorans ATCC 17616 genomic DNA, complete genome, chromosome 3
All Bacteria (B)	>NC_010802	1 Burkholderia multivorans ATCC 17616 plasmid pTGL1 DNA, complete sequence
All Bacteria (B)	>NC_011999	1 Macrococcus caseolyticus JCSC5402, complete sequence
All Bacteria (B)	>NC_011995	1 Macrococcus caseolyticus JCSC5402 plasmid pMCCL1, complete sequence
All Bacteria (B)	>NC_011996	1 Macrococcus caseolyticus JCSC5402 plasmid pMCCL2, complete sequence
All Bacteria (B)	>NC_011997	1 Macrococcus caseolyticus JCSC5402 plasmid pMCCL3, complete sequence
All Bacteria (B)	>NC_011998	1 Macrococcus caseolyticus JCSC5402 plasmid pMCCL4, complete sequence
All Bacteria (B)	>NC_012000	1 Macrococcus caseolyticus JCSC5402 plasmid pMCCL5, complete sequence
All Bacteria (B)	>NC_012001	1 Macrococcus caseolyticus JCSC5402 plasmid pMCCL6, complete sequence
All Bacteria (B)	>NC_012002	1 Macrococcus caseolyticus JCSC5402 plasmid pMCCL7, complete sequence
All Bacteria (B)	>NC_012003	1 Macrococcus caseolyticus JCSC5402 plasmid pMCCL8, complete sequence
All Bacteria (B)	>NC_010572	1 Streptomyces griseus subsp	griseus NBRC 13350, complete sequence
All Bacteria (B)	>NC_010296	1 Microcystis aeruginosa NIES-843, complete sequence
All Bacteria (B)	>NC_011565	1 Candidatus Azobacteroides pseudotrichonymphae genomovar	CFP2 DNA, complete genome
All Bacteria (B)	>NC_011564	1 Candidatus Azobacteroides pseudotrichonymphae genomovar	CFP2 plasmid pCFPG1 DNA, complete sequence
All Bacteria (B)	>NC_011561	1 Candidatus Azobacteroides pseudotrichonymphae genomovar	CFP2 plasmid pCFPG2 DNA, complete sequence
All Bacteria (B)	>NC_011562	1 Candidatus Azobacteroides pseudotrichonymphae genomovar	CFP2 plasmid pCFPG3 DNA, complete sequence
All Bacteria (B)	>NC_011563	1 Candidatus Azobacteroides pseudotrichonymphae genomovar	CFP2 plasmid pCFPG4 DNA, complete sequence
All Bacteria (B)	>NC_012796	1 Desulfovibrio magneticus RS-1, complete sequence
All Bacteria (B)	>NC_012797	1 Desulfovibrio magneticus RS-1 plasmid pDMC1, complete sequence
All Bacteria (B)	>NC_012795	1 Desulfovibrio magneticus RS-1 plasmid pDMC2, complete sequence
All Bacteria (B)	>NC_012207	1 Mycobacterium tuberculosis variant bovis BCG str	Tokyo 172, complete sequence
All Bacteria (B)	>NC_012891	1 Streptococcus dysgalactiae subsp	equisimilis GGS_124 chromosome 1, complete sequence
All Bacteria (B)	>NC_013854	1 Azospirillum sp	B510, complete sequence
All Bacteria (B)	>NC_013855	1 Azospirillum sp	B510 plasmid pAB510a, complete sequence
All Bacteria (B)	>NC_013856	1 Azospirillum sp	B510 plasmid pAB510b, complete sequence
All Bacteria (B)	>NC_013857	1 Azospirillum sp	B510 plasmid pAB510c, complete sequence
All Bacteria (B)	>NC_013858	1 Azospirillum sp	B510 plasmid pAB510d, complete sequence
All Bacteria (B)	>NC_013859	1 Azospirillum sp	B510 plasmid pAB510e, complete sequence
All Bacteria (B)	>NC_013860	1 Azospirillum sp	B510 plasmid pAB510f, complete sequence
All Bacteria (B)	>NC_013353	1 Escherichia coli O103:H2 str	12009, complete sequence
All Bacteria (B)	>NC_013354	1 Escherichia coli O103:H2 str	12009 plasmid pO103, complete sequence
All Bacteria (B)	>NC_013364	1 Escherichia coli O111:H- str	11128, complete sequence
All Bacteria (B)	>NC_013365	1 Escherichia coli O111:H- str	11128 plasmid pO111_1, complete sequence
All Bacteria (B)	>NC_013370	1 Escherichia coli O111:H- str	11128 plasmid pO111_2, complete sequence
All Bacteria (B)	>NC_013366	1 Escherichia coli O111:H- str	11128 plasmid pO111_3, complete sequence
All Bacteria (B)	>NC_013367	1 Escherichia coli O111:H- str	11128 plasmid pO111_4, complete sequence
All Bacteria (B)	>NC_013368	1 Escherichia coli O111:H- str	11128 plasmid pO111_5, complete sequence
All Bacteria (B)	>NC_013799	1 Hydrogenobacter thermophilus TK-6, complete sequence
All Bacteria (B)	>NC_012522	1 Rhodococcus opacus B4, complete sequence
All Bacteria (B)	>NC_012523	1 Rhodococcus opacus B4 plasmid pKNR, complete sequence
All Bacteria (B)	>NC_006969	2 Rhodococcus opacus B4 plasmid pKNR01, complete sequence
All Bacteria (B)	>NC_006970	2 Rhodococcus opacus B4 plasmid pKNR02, complete sequence
All Bacteria (B)	>NC_012520	1 Rhodococcus opacus B4 plasmid pROB01, complete sequence
All Bacteria (B)	>NC_012521	1 Rhodococcus opacus B4 plasmid pROB02, complete sequence
All Bacteria (B)	>NC_013209	1 Acetobacter pasteurianus IFO 3283-01, complete sequence
All Bacteria (B)	>NC_013210	1 Acetobacter pasteurianus IFO 3283-01 plasmid pAPA01-011, complete sequence
All Bacteria (B)	>NC_013211	1 Acetobacter pasteurianus IFO 3283-01 plasmid pAPA01-020, complete sequence
All Bacteria (B)	>NC_013212	1 Acetobacter pasteurianus IFO 3283-01 plasmid pAPA01-030, complete sequence
All Bacteria (B)	>NC_013213	1 Acetobacter pasteurianus IFO 3283-01 plasmid pAPA01-040, complete sequence
All Bacteria (B)	>NC_013214	1 Acetobacter pasteurianus IFO 3283-01 plasmid pAPA01-050, complete sequence
All Bacteria (B)	>NC_013215	1 Acetobacter pasteurianus IFO 3283-01 plasmid pAPA01-060, complete sequence
All Bacteria (B)	>NC_017100	1 Acetobacter pasteurianus IFO 3283-03, complete sequence
All Bacteria (B)	>NC_017101	1 Acetobacter pasteurianus IFO 3283-03 plasmid pAPA03-010, complete sequence
All Bacteria (B)	>NC_017118	1 Acetobacter pasteurianus IFO 3283-03 plasmid pAPA03-020, complete sequence
All Bacteria (B)	>NC_017119	1 Acetobacter pasteurianus IFO 3283-03 plasmid pAPA03-030, complete sequence
All Bacteria (B)	>NC_017142	1 Acetobacter pasteurianus IFO 3283-03 plasmid pAPA03-040, complete sequence
All Bacteria (B)	>NC_017120	1 Acetobacter pasteurianus IFO 3283-03 plasmid pAPA03-050, complete sequence
All Bacteria (B)	>NC_017109	1 Acetobacter pasteurianus IFO 3283-03 plasmid pAPA03-060, complete sequence
All Bacteria (B)	>NC_017121	1 Acetobacter pasteurianus IFO 3283-07, complete sequence
All Bacteria (B)	>NC_017143	1 Acetobacter pasteurianus IFO 3283-07 plasmid pAPA07-010, complete sequence
All Bacteria (B)	>NC_017122	1 Acetobacter pasteurianus IFO 3283-07 plasmid pAPA07-020, complete sequence
All Bacteria (B)	>NC_017110	1 Acetobacter pasteurianus IFO 3283-07 plasmid pAPA07-030, complete sequence
All Bacteria (B)	>NC_017123	1 Acetobacter pasteurianus IFO 3283-07 plasmid pAPA07-040, complete sequence
All Bacteria (B)	>NC_017144	1 Acetobacter pasteurianus IFO 3283-07 plasmid pAPA07-050, complete sequence
All Bacteria (B)	>NC_017124	1 Acetobacter pasteurianus IFO 3283-07 plasmid pAPA07-060, complete sequence
All Bacteria (B)	>NC_017125	1 Acetobacter pasteurianus IFO 3283-22, complete sequence
All Bacteria (B)	>NC_017117	1 Acetobacter pasteurianus IFO 3283-22 plasmid pAPA22-010, complete sequence
All Bacteria (B)	>NC_017126	1 Acetobacter pasteurianus IFO 3283-22 plasmid pAPA22-020, complete sequence
All Bacteria (B)	>NC_017127	1 Acetobacter pasteurianus IFO 3283-22 plasmid pAPA22-030, complete sequence
All Bacteria (B)	>NC_017145	1 Acetobacter pasteurianus IFO 3283-22 plasmid pAPA22-040, complete sequence
All Bacteria (B)	>NC_017128	1 Acetobacter pasteurianus IFO 3283-22 plasmid pAPA22-050, complete sequence
All Bacteria (B)	>NC_017129	1 Acetobacter pasteurianus IFO 3283-22 plasmid pAPA22-060, complete sequence
All Bacteria (B)	>NC_017146	1 Acetobacter pasteurianus IFO 3283-26, complete sequence
All Bacteria (B)	>NC_017130	1 Acetobacter pasteurianus IFO 3283-26 plasmid pAPA26-013, complete sequence
All Bacteria (B)	>NC_017131	1 Acetobacter pasteurianus IFO 3283-26 plasmid pAPA26-020, complete sequence
All Bacteria (B)	>NC_017147	1 Acetobacter pasteurianus IFO 3283-26 plasmid pAPA26-030, complete sequence
All Bacteria (B)	>NC_017132	1 Acetobacter pasteurianus IFO 3283-26 plasmid pAPA26-040, complete sequence
All Bacteria (B)	>NC_017148	1 Acetobacter pasteurianus IFO 3283-26 plasmid pAPA26-050, complete sequence
All Bacteria (B)	>NC_017133	1 Acetobacter pasteurianus IFO 3283-26 plasmid pAPA26-060, complete sequence
All Bacteria (B)	>NC_017111	1 Acetobacter pasteurianus IFO 3283-32, complete sequence
All Bacteria (B)	>NC_017134	1 Acetobacter pasteurianus IFO 3283-32 plasmid pAPA32-012, complete sequence
All Bacteria (B)	>NC_017149	1 Acetobacter pasteurianus IFO 3283-32 plasmid pAPA32-020, complete sequence
All Bacteria (B)	>NC_017135	1 Acetobacter pasteurianus IFO 3283-32 plasmid pAPA32-030, complete sequence
All Bacteria (B)	>NC_017102	1 Acetobacter pasteurianus IFO 3283-32 plasmid pAPA32-040, complete sequence
All Bacteria (B)	>NC_017103	1 Acetobacter pasteurianus IFO 3283-32 plasmid pAPA32-050, complete sequence
All Bacteria (B)	>NC_017112	1 Acetobacter pasteurianus IFO 3283-32 plasmid pAPA32-060, complete sequence
All Bacteria (B)	>NC_017150	1 Acetobacter pasteurianus IFO 3283-01-42C, complete sequence
All Bacteria (B)	>NC_017104	1 Acetobacter pasteurianus IFO 3283-01-42C plasmid pAPA42C_011, complete sequence
All Bacteria (B)	>NC_017105	1 Acetobacter pasteurianus IFO 3283-01-42C plasmid pAPA42C_020, complete sequence
All Bacteria (B)	>NC_017151	1 Acetobacter pasteurianus IFO 3283-01-42C plasmid pAPA42C_030, complete sequence
All Bacteria (B)	>NC_017106	1 Acetobacter pasteurianus IFO 3283-01-42C plasmid pAPA42C_040, complete sequence
All Bacteria (B)	>NC_017107	1 Acetobacter pasteurianus IFO 3283-01-42C plasmid pAPA42C_050, complete sequence
All Bacteria (B)	>NC_017152	1 Acetobacter pasteurianus IFO 3283-01-42C plasmid pAPA42C_060, complete sequence
All Bacteria (B)	>NC_017108	1 Acetobacter pasteurianus IFO 3283-12, complete sequence
All Bacteria (B)	>NC_017136	1 Acetobacter pasteurianus IFO 3283-12 plasmid pAPA12-014, complete sequence
All Bacteria (B)	>NC_017113	1 Acetobacter pasteurianus IFO 3283-12 plasmid pAPA12-020, complete sequence
All Bacteria (B)	>NC_017114	1 Acetobacter pasteurianus IFO 3283-12 plasmid pAPA12-030, complete sequence
All Bacteria (B)	>NC_017115	1 Acetobacter pasteurianus IFO 3283-12 plasmid pAPA12-040, complete sequence
All Bacteria (B)	>NC_017116	1 Acetobacter pasteurianus IFO 3283-12 plasmid pAPA12-050, complete sequence
All Bacteria (B)	>NC_017137	1 Acetobacter pasteurianus IFO 3283-12 plasmid pAPA12-060, complete sequence
All Bacteria (B)	>NC_013939	1 Deferribacter desulfuricans SSM1 DNA, complete genome
All Bacteria (B)	>NC_013940	1 Deferribacter desulfuricans SSM1 plasmid megaplasmid pDF308 DNA, complete genome
All Bacteria (B)	>NC_013715	1 Rothia mucilaginosa DY-18 DNA, complete genome
All Bacteria (B)	>NC_017482	1 Lactobacillus rhamnosus GG, complete sequence
All Bacteria (B)	>NC_004663	1 Bacteroides thetaiotaomicron VPI-5482 chromosome, complete genome
All Bacteria (B)	>NC_004703	1 Bacteroides thetaiotaomicron VPI-5482 plasmid p5482, complete sequence
All Bacteria (B)	>NC_002570	2 Bacillus halodurans C-125 DNA, complete genome
All Bacteria (B)	>NC_002491	1 Chlamydia pneumoniae J138, complete sequence
All Bacteria (B)	>NC_004432	1 Mycoplasma penetrans HF-2, complete sequence
All Bacteria (B)	>NC_004193	1 Oceanobacillus iheyensis HTE831, complete sequence
All Bacteria (B)	>NC_003923	1 Staphylococcus aureus subsp	aureus MW2, complete sequence
All Bacteria (B)	>NC_004606	1 Streptococcus pyogenes SSI-1 DNA, complete genome
All Bacteria (B)	>NC_004369	1 Corynebacterium efficiens YS-314 DNA, complete genome
All Bacteria (B)	>NC_004319	1 Corynebacterium efficiens YS-314 plasmid pCE2 DNA, complete sequence
All Bacteria (B)	>NC_004320	1 Corynebacterium efficiens YS-314 plasmid pCE3 DNA, complete sequence
All Bacteria (B)	>NC_003450	3 Corynebacterium glutamicum ATCC 13032 chromosome, complete genome
All Bacteria (B)	>NC_004113	1 Thermosynechococcus elongatus BP-1 chromosome, complete genome
All Bacteria (B)	>NC_004463	1 Bradyrhizobium japonicum USDA 110 chromosome, complete genome
All Bacteria (B)	>NC_005125	1 Gloeobacter violaceus PCC 7421 chromosome, complete genome
All Bacteria (B)	>NC_017463	1 Francisella tularensis subsp	holarctica OSU18, complete genome
All Bacteria (B)	>NC_005364	2 Mycoplasma mycoides subsp	mycoides SC str	PG1 chromosome, complete genome
All Bacteria (B)	>NC_005072	1 Prochlorococcus marinus subsp	pastoris str	CCMP1986, complete sequence
All Bacteria (B)	>NC_005071	1 Prochlorococcus marinus str	MIT 9313, complete sequence
All Bacteria (B)	>NC_002952	2 Staphylococcus aureus subsp	aureus MRSA252, complete sequence
All Bacteria (B)	>NC_002953	3 Staphylococcus aureus subsp	aureus MSSA476, complete sequence
All Bacteria (B)	>NC_005951	1 Staphylococcus aureus subsp	aureus MSSA476 plasmid pSAS, complete sequence
All Bacteria (B)	>NC_006350	1 Burkholderia pseudomallei K96243 chromosome 1, complete sequence
All Bacteria (B)	>NC_006351	1 Burkholderia pseudomallei K96243 chromosome 2, complete sequence
All Bacteria (B)	>NC_004547	2 Pectobacterium atrosepticum SCRI1043, complete sequence
All Bacteria (B)	>NC_006274	1 Bacillus cereus E33L, complete genome
All Bacteria (B)	>NC_007103	1 Bacillus cereus E33L plasmid pE33L466, complete sequence
All Bacteria (B)	>NC_007104	1 Bacillus cereus E33L plasmid pE33L5, complete sequence
All Bacteria (B)	>NC_007105	1 Bacillus cereus E33L plasmid pE33L54, complete sequence
All Bacteria (B)	>NC_007106	1 Bacillus cereus E33L plasmid pE33L8, complete sequence
All Bacteria (B)	>NC_007107	1 Bacillus cereus E33L plasmid pE33L9, complete sequence
All Bacteria (B)	>NC_006270	3 Bacillus licheniformis DSM 13 = ATCC 14580, complete sequence
All Bacteria (B)	>NC_006086	1 Streptococcus pyogenes MGAS10394, complete genome
All Bacteria (B)	>NC_006677	1 Gluconobacter oxydans 621H, complete genome
All Bacteria (B)	>NC_006672	1 Gluconobacter oxydans 621H plasmid pGOX1, complete sequence
All Bacteria (B)	>NC_006673	1 Gluconobacter oxydans 621H plasmid pGOX2, complete sequence
All Bacteria (B)	>NC_006674	1 Gluconobacter oxydans 621H plasmid pGOX3, complete sequence
All Bacteria (B)	>NC_006675	1 Gluconobacter oxydans 621H plasmid pGOX4, complete sequence
All Bacteria (B)	>NC_006676	1 Gluconobacter oxydans 621H plasmid pGOX5, complete sequence
All Bacteria (B)	>NC_006348	1 Burkholderia mallei ATCC 23344 chromosome 1, complete sequence
All Bacteria (B)	>NC_006349	2 Burkholderia mallei ATCC 23344 chromosome 2, complete sequence
All Bacteria (B)	>NC_017382	1 Helicobacter pylori 51, complete genome
All Bacteria (B)	>NC_007292	1 Candidatus Blochmannia pennsylvanicus str	BPEN, complete genome
All Bacteria (B)	>NC_007297	2 Streptococcus pyogenes MGAS5005, complete sequence
All Bacteria (B)	>NC_008309	1 Histophilus somni 129PT, complete sequence
All Bacteria (B)	>NC_006298	1 Histophilus somni 129PT plasmid pHS129, complete sequence
All Bacteria (B)	>NC_006840	2 Vibrio fischeri ES114 chromosome I, complete sequence
All Bacteria (B)	>NC_006841	2 Vibrio fischeri ES114 chromosome II, complete sequence
All Bacteria (B)	>NC_006842	1 Vibrio fischeri ES114 plasmid pES100, complete sequence
All Bacteria (B)	>NC_006448	1 Streptococcus thermophilus LMG 18311, complete genome
All Bacteria (B)	>NC_006449	1 Streptococcus thermophilus CNRZ1066, complete genome
All Bacteria (B)	>NC_003912	7 Campylobacter jejuni RM1221, complete genome
All Bacteria (B)	>NC_006511	1 Salmonella enterica subsp	enterica serovar Paratyphi A str	ATCC 9150, complete genome
All Bacteria (B)	>NC_002936	3 Dehalococcoides mccartyi 195, complete sequence
All Bacteria (B)	>NC_002976	3 Staphylococcus epidermidis RP62A, complete genome
All Bacteria (B)	>NC_006663	1 Staphylococcus epidermidis RP62A plasmid pSERP, complete sequence
All Bacteria (B)	>NC_004842	2 Anaplasma marginale str	St	Maries, complete sequence
All Bacteria (B)	>NC_003911	12 Ruegeria pomeroyi DSS-3, complete sequence
All Bacteria (B)	>NC_006569	1 Ruegeria pomeroyi DSS-3 megaplasmid, complete sequence
All Bacteria (B)	>NC_006814	3 Lactobacillus acidophilus NCFM chromosome, complete genome
All Bacteria (B)	>NC_007606	1 Shigella dysenteriae Sd197 chromosome, complete genome
All Bacteria (B)	>NC_009344	1 Shigella dysenteriae Sd197 plasmid pSD197_spA, complete sequence
All Bacteria (B)	>NC_007607	1 Shigella dysenteriae Sd197 plasmid pSD1_197, complete sequence
All Bacteria (B)	>NC_007613	1 Shigella boydii Sb227, complete sequence
All Bacteria (B)	>NC_007608	1 Shigella boydii Sb227 plasmid pSB4_227, complete sequence
All Bacteria (B)	>NC_002951	2 Staphylococcus aureus subsp	aureus COL, complete genome
All Bacteria (B)	>NC_006629	2 Staphylococcus aureus subsp	aureus COL plasmid pT181, complete genome
All Bacteria (B)	>NC_008710	1 Borrelia turicatae 91E135, complete genome
All Bacteria (B)	>NZ_CP019362	1 Borrelia turicatae 91E135 plasmid cp31, complete sequence
All Bacteria (B)	>NZ_CP019363	1 Borrelia turicatae 91E135 plasmid cpD, complete sequence
All Bacteria (B)	>NZ_CP019364	1 Borrelia turicatae 91E135 plasmid lpB34, complete sequence
All Bacteria (B)	>NZ_CP019365	1 Borrelia turicatae 91E135 plasmid lpE43, complete sequence
All Bacteria (B)	>NZ_CP019366	1 Borrelia turicatae 91E135 plasmid lpF33	5, complete sequence
All Bacteria (B)	>NZ_CP019367	1 Borrelia turicatae 91E135 plasmid lpG29, complete sequence
All Bacteria (B)	>NZ_CP019368	1 Borrelia turicatae 91E135 plasmid lpT39, complete sequence
All Bacteria (B)	>NZ_CP019369	1 Borrelia turicatae 91E135 plasmid lpU43, complete sequence
All Bacteria (B)	>NC_007086	1 Xanthomonas campestris pv	campestris str	8004, complete genome
All Bacteria (B)	>NC_007429	1 Chlamydia trachomatis A/HAR-13, complete sequence
All Bacteria (B)	>NC_007430	1 Chlamydia trachomatis A/HAR-13 plasmid pCTA, complete sequence
All Bacteria (B)	>NC_007109	1 Rickettsia felis URRWXCal2, complete genome
All Bacteria (B)	>NC_007110	1 Rickettsia felis URRWXCal2 plasmid pRF, complete sequence
All Bacteria (B)	>NC_007111	1 Rickettsia felis URRWXCal2 plasmid pRFdelta, complete sequence
All Bacteria (B)	>NC_007296	2 Streptococcus pyogenes MGAS6180, complete sequence
All Bacteria (B)	>NC_007146	2 Haemophilus influenzae 86-028NP, complete genome
All Bacteria (B)	>NC_005773	3 Pseudomonas savastanoi pv	phaseolicola 1448A, complete sequence
All Bacteria (B)	>NC_007274	1 Pseudomonas savastanoi pv	phaseolicola 1448A large plasmid, complete sequence
All Bacteria (B)	>NC_007275	1 Pseudomonas savastanoi pv	phaseolicola 1448A small plasmid, complete sequence
All Bacteria (B)	>NC_007716	1 Aster yellows witches'-broom phytoplasma AYWB, complete sequence
All Bacteria (B)	>NC_007717	1 Aster yellows witches'-broom phytoplasma AYWB plasmid pAYWB-I, complete sequence
All Bacteria (B)	>NC_007718	1 Aster yellows witches'-broom phytoplasma AYWB plasmid pAYWB-II, complete sequence
All Bacteria (B)	>NC_007719	1 Aster yellows witches'-broom phytoplasma AYWB plasmid pAYWB-III, complete sequence
All Bacteria (B)	>NC_007720	1 Aster yellows witches'-broom phytoplasma AYWB plasmid pAYWB-IV, complete sequence
All Bacteria (B)	>NC_007005	1 Pseudomonas syringae pv	syringae B728a chromosome, complete genome
All Bacteria (B)	>NC_004129	6 Pseudomonas protegens Pf-5, complete sequence
All Bacteria (B)	>NC_007204	1 Psychrobacter arcticus 273-4, complete genome
All Bacteria (B)	>NC_003910	7 Colwellia psychrerythraea 34H, complete sequence
All Bacteria (B)	>NC_007205	1 Candidatus Pelagibacter ubique HTCC1062, complete genome
All Bacteria (B)	>NC_007651	1 Burkholderia thailandensis E264 chromosome I, complete sequence
All Bacteria (B)	>NC_007650	1 Burkholderia thailandensis E264 chromosome II, complete sequence
All Bacteria (B)	>NC_007940	1 Rickettsia bellii RML369-C, complete genome
All Bacteria (B)	>NC_007333	1 Thermobifida fusca YX, complete genome
All Bacteria (B)	>NC_007298	1 Dechloromonas aromatica RCB, complete genome
All Bacteria (B)	>NC_007492	2 Pseudomonas fluorescens Pf0-1, complete genome
All Bacteria (B)	>NC_007335	2 Prochlorococcus marinus str	NATL2A, complete genome
All Bacteria (B)	>NC_007512	1 Pelodictyon luteolum DSM 273, complete sequence
All Bacteria (B)	>NC_007513	1 Synechococcus sp	CC9902, complete genome
All Bacteria (B)	>NC_007604	1 Synechococcus elongatus PCC 7942, complete genome
All Bacteria (B)	>NC_007595	1 Synechococcus elongatus PCC 7942 plasmid 1, complete sequence
All Bacteria (B)	>NC_007354	1 Ehrlichia canis str	Jake, complete genome
All Bacteria (B)	>NC_007514	1 Chlorobium chlorochromatii CaD3, complete genome
All Bacteria (B)	>NC_007520	2 Hydrogenovibrio crunogenus XCL-2, complete sequence
All Bacteria (B)	>NC_007516	1 Synechococcus sp	CC9605, complete genome
All Bacteria (B)	>NC_007577	1 Prochlorococcus marinus str	MIT 9312, complete genome
All Bacteria (B)	>NC_007519	1 Desulfovibrio alaskensis G20, complete sequence
All Bacteria (B)	>NC_008095	1 Myxococcus xanthus DK 1622, complete genome
All Bacteria (B)	>NC_007432	1 Streptococcus agalactiae A909, complete genome
All Bacteria (B)	>NC_007406	1 Nitrobacter winogradskyi Nb-255, complete genome
All Bacteria (B)	>NC_007404	1 Thiobacillus denitrificans ATCC 25259, complete genome
All Bacteria (B)	>NC_007633	1 Mycoplasma capricolum subsp	capricolum ATCC 27343, complete genome
All Bacteria (B)	>NC_007434	1 Burkholderia pseudomallei 1710b chromosome I, complete sequence
All Bacteria (B)	>NC_007435	1 Burkholderia pseudomallei 1710b chromosome II, complete sequence
All Bacteria (B)	>NC_007484	1 Nitrosococcus oceani ATCC 19707, complete genome
All Bacteria (B)	>NC_007483	1 Nitrosococcus oceani ATCC 19707 plasmid A, complete sequence
All Bacteria (B)	>NC_009614	1 Bacteroides vulgatus ATCC 8482, complete sequence
All Bacteria (B)	>NC_009615	1 Parabacteroides distasonis ATCC 8503, complete sequence
All Bacteria (B)	>NC_007503	1 Carboxydothermus hydrogenoformans Z-2901, complete genome
All Bacteria (B)	>NC_007498	2 Pelobacter carbinolicus DSM 2380, complete sequence
All Bacteria (B)	>NC_007517	1 Geobacter metallireducens GS-15, complete genome
All Bacteria (B)	>NC_007515	1 Geobacter metallireducens GS-15 plasmid, complete genome
All Bacteria (B)	>NC_007510	1 Burkholderia lata chromosome 1, complete sequence
All Bacteria (B)	>NC_007511	1 Burkholderia lata chromosome 2, complete sequence
All Bacteria (B)	>NC_007509	1 Burkholderia lata chromosome 3, complete sequence
All Bacteria (B)	>NC_007575	1 Sulfurimonas denitrificans DSM 1251, complete sequence
All Bacteria (B)	>NC_007645	1 Hahella chejuensis KCTC 2396, complete sequence
All Bacteria (B)	>NC_007722	1 Erythrobacter litoralis HTCC2594, complete genome
All Bacteria (B)	>NC_008358	1 Hyphomonas neptunium ATCC 15444, complete sequence
All Bacteria (B)	>NC_007677	1 Salinibacter ruber DSM 13855 chromosome, complete genome
All Bacteria (B)	>NC_007678	1 Salinibacter ruber DSM 13855 plasmid pSR35, complete sequence
All Bacteria (B)	>NC_011969	1 Bacillus cereus Q1, complete genome
All Bacteria (B)	>NC_011973	1 Bacillus cereus Q1 plasmid pBc239, complete sequence
All Bacteria (B)	>NC_011971	1 Bacillus cereus Q1 plasmid pBc53, complete sequence
All Bacteria (B)	>NC_007643	1 Rhodospirillum rubrum ATCC 11170 chromosome, complete genome
All Bacteria (B)	>NC_007641	1 Rhodospirillum rubrum ATCC 11170 plasmid unnamed, complete sequence
All Bacteria (B)	>NC_007644	1 Moorella thermoacetica ATCC 39073 chromosome, complete genome
All Bacteria (B)	>NC_007797	1 Anaplasma phagocytophilum str	HZ, complete sequence
All Bacteria (B)	>NC_007799	1 Ehrlichia chaffeensis str	Arkansas, complete sequence
All Bacteria (B)	>NC_007798	1 Neorickettsia sennetsu str	Miyayama, complete sequence
All Bacteria (B)	>NC_007984	1 Baumannia cicadellinicola str	Hc (Homalodisca coagulata), complete genome
All Bacteria (B)	>NC_007775	1 Synechococcus sp	JA-3-3Ab, complete genome
All Bacteria (B)	>NC_007776	1 Synechococcus sp	JA-2-3B'a(2-13), complete genome
All Bacteria (B)	>NC_008086	1 Helicobacter pylori HPAG1, complete genome
All Bacteria (B)	>NC_008087	1 Helicobacter pylori HPAG1 plasmid pHPAG1, complete sequence
All Bacteria (B)	>NC_007946	1 Escherichia coli UTI89, complete genome
All Bacteria (B)	>NC_007941	1 Escherichia coli UTI89 plasmid pUTI89, complete sequence
All Bacteria (B)	>NC_008261	1 Clostridium perfringens ATCC 13124, complete sequence
All Bacteria (B)	>NC_008253	1 Escherichia coli 536, complete genome
All Bacteria (B)	>NC_007794	1 Novosphingobium aromaticivorans DSM 12444, complete genome
All Bacteria (B)	>NC_009426	1 Novosphingobium aromaticivorans DSM 12444 plasmid pNL1, complete sequence
All Bacteria (B)	>NC_009427	1 Novosphingobium aromaticivorans DSM 12444 plasmid pNL2, complete sequence
All Bacteria (B)	>NC_007777	1 Frankia casuarinae, complete sequence
All Bacteria (B)	>NC_007778	1 Rhodopseudomonas palustris HaA2, complete genome
All Bacteria (B)	>NC_007760	1 Anaeromyxobacter dehalogenans 2CP-C, complete genome
All Bacteria (B)	>NC_007759	1 Syntrophus aciditrophicus SB, complete sequence
All Bacteria (B)	>NC_007795	1 Staphylococcus aureus subsp	aureus NCTC 8325 chromosome, complete genome
All Bacteria (B)	>NC_007793	1 Staphylococcus aureus subsp	aureus USA300_FPR3757, complete genome
All Bacteria (B)	>NC_007790	1 Staphylococcus aureus subsp	aureus USA300_FPR3757 plasmid pUSA01, complete sequence
All Bacteria (B)	>NC_007791	1 Staphylococcus aureus subsp	aureus USA300_FPR3757 plasmid pUSA02, complete sequence
All Bacteria (B)	>NC_007792	1 Staphylococcus aureus subsp	aureus USA300_FPR3757 plasmid pUSA03, complete sequence
All Bacteria (B)	>NC_008021	1 Streptococcus pyogenes MGAS9429, complete genome
All Bacteria (B)	>NC_008022	1 Streptococcus pyogenes MGAS10270, complete genome
All Bacteria (B)	>NC_008023	1 Streptococcus pyogenes MGAS2096, complete genome
All Bacteria (B)	>NC_008024	1 Streptococcus pyogenes MGAS10750, complete genome
All Bacteria (B)	>NC_007802	1 Jannaschia sp	CCS1, complete genome
All Bacteria (B)	>NC_007801	1 Jannaschia sp	CCS1 plasmid1, complete sequence
All Bacteria (B)	>NC_008258	1 Shigella flexneri 5 str	8401, complete genome
All Bacteria (B)	>NC_007908	1 Rhodoferax ferrireducens T118, complete genome
All Bacteria (B)	>NC_007901	1 Rhodoferax ferrireducens T118 plasmid1, complete sequence
All Bacteria (B)	>NC_009659	1 Janthinobacterium sp	Marseille, complete genome
All Bacteria (B)	>NC_007951	1 Paraburkholderia xenovorans LB400 chromosome 1, complete sequence
All Bacteria (B)	>NC_007952	1 Paraburkholderia xenovorans LB400 chromosome 2, complete sequence
All Bacteria (B)	>NC_007953	1 Paraburkholderia xenovorans LB400 chromosome 3, complete sequence
All Bacteria (B)	>NC_007912	1 Saccharophagus degradans 2-40, complete sequence
All Bacteria (B)	>NC_007947	1 Methylobacillus flagellatus KT, complete genome
All Bacteria (B)	>NC_007925	1 Rhodopseudomonas palustris BisB18, complete genome
All Bacteria (B)	>NC_007954	1 Shewanella denitrificans OS217, complete genome
All Bacteria (B)	>NC_009434	1 Pseudomonas stutzeri A1501, complete genome
All Bacteria (B)	>NC_008149	1 Yersinia pestis Nepal516, complete genome
All Bacteria (B)	>NC_008118	1 Yersinia pestis Nepal516 plasmid pMT, complete sequence
All Bacteria (B)	>NC_008119	1 Yersinia pestis Nepal516 plasmid pPCP, complete sequence
All Bacteria (B)	>NC_008150	1 Yersinia pestis Antiqua, complete genome
All Bacteria (B)	>NC_008122	1 Yersinia pestis Antiqua plasmid pCD, complete sequence
All Bacteria (B)	>NC_008120	1 Yersinia pestis Antiqua plasmid pMT, complete sequence
All Bacteria (B)	>NC_008121	1 Yersinia pestis Antiqua plasmid pPCP, complete sequence
All Bacteria (B)	>NC_007948	1 Polaromonas sp	JS666, complete genome
All Bacteria (B)	>NC_007949	1 Polaromonas sp	JS666 plasmid 1, complete sequence
All Bacteria (B)	>NC_007950	1 Polaromonas sp	JS666 plasmid 2, complete sequence
All Bacteria (B)	>NC_007964	1 Nitrobacter hamburgensis X14, complete genome
All Bacteria (B)	>NC_007959	1 Nitrobacter hamburgensis X14 plasmid 1, complete sequence
All Bacteria (B)	>NC_007960	1 Nitrobacter hamburgensis X14 plasmid 2, complete sequence
All Bacteria (B)	>NC_007961	1 Nitrobacter hamburgensis X14 plasmid 3, complete sequence
All Bacteria (B)	>NC_007969	1 Psychrobacter cryohalolentis K5, complete genome
All Bacteria (B)	>NC_007968	1 Psychrobacter cryohalolentis K5 plasmid 1, complete sequence
All Bacteria (B)	>NC_008611	1 Mycobacterium ulcerans Agy99, complete sequence
All Bacteria (B)	>NC_005916	1 Mycobacterium ulcerans Agy99 plasmid pMUM001, complete sequence
All Bacteria (B)	>NC_008508	1 Leptospira borgpetersenii serovar Hardjo-bovis str	L550 chromosome 1, complete sequence
All Bacteria (B)	>NC_008509	1 Leptospira borgpetersenii serovar Hardjo-bovis str	L550 chromosome 2, complete sequence
All Bacteria (B)	>NC_008510	1 Leptospira borgpetersenii serovar Hardjo-bovis str	JB197 chromosome 1, complete sequence
All Bacteria (B)	>NC_008511	1 Leptospira borgpetersenii serovar Hardjo-bovis str	JB197 chromosome 2, complete sequence
All Bacteria (B)	>NC_008048	1 Sphingopyxis alaskensis RB2256, complete genome
All Bacteria (B)	>NC_008036	1 Sphingopyxis alaskensis RB2256 F plasmid, complete sequence
All Bacteria (B)	>NC_008009	1 Candidatus Koribacter versatilis Ellin345, complete genome
All Bacteria (B)	>NC_009850	1 Arcobacter butzleri RM4018, complete genome
All Bacteria (B)	>NC_008209	1 Roseobacter denitrificans OCh 114, complete genome
All Bacteria (B)	>NC_008386	1 Roseobacter denitrificans OCh 114 plasmid pTB1, complete sequence
All Bacteria (B)	>NC_008387	1 Roseobacter denitrificans OCh 114 plasmid pTB2, complete sequence
All Bacteria (B)	>NC_008388	1 Roseobacter denitrificans OCh 114 plasmid pTB3, complete sequence
All Bacteria (B)	>NC_008389	1 Roseobacter denitrificans OCh 114 plasmid pTB4, complete sequence
All Bacteria (B)	>NC_008044	1 Ruegeria sp	TM1040, complete genome
All Bacteria (B)	>NC_008043	1 Ruegeria sp	TM1040 mega plasmid, complete sequence
All Bacteria (B)	>NC_008042	1 Ruegeria sp	TM1040 plasmid unnamed, complete sequence
All Bacteria (B)	>NC_008060	1 Burkholderia cenocepacia AU 1054 chromosome 1, complete sequence
All Bacteria (B)	>NC_008061	1 Burkholderia cenocepacia AU 1054 chromosome 2, complete sequence
All Bacteria (B)	>NC_008062	1 Burkholderia cenocepacia AU 1054 chromosome 3, complete sequence
All Bacteria (B)	>NC_010120	1 Neisseria meningitidis 053442, complete sequence
All Bacteria (B)	>NC_008593	1 Clostridium novyi NT, complete genome
All Bacteria (B)	>NC_008255	1 Cytophaga hutchinsonii ATCC 33406, complete genome
All Bacteria (B)	>NC_008148	1 Rubrobacter xylanophilus DSM 9941, complete genome
All Bacteria (B)	>NC_009009	1 Streptococcus sanguinis SK36 chromosome, complete genome
All Bacteria (B)	>NC_008228	1 Pseudoalteromonas atlantica T6c, complete genome
All Bacteria (B)	>NC_008254	1 Chelativorans sp	BNC1, complete genome
All Bacteria (B)	>NC_008242	1 Chelativorans sp	BNC1 plasmid 1, complete sequence
All Bacteria (B)	>NC_008243	1 Chelativorans sp	BNC1 plasmid 2, complete sequence
All Bacteria (B)	>NC_008244	1 Chelativorans sp	BNC1 plasmid 3, complete sequence
All Bacteria (B)	>NC_008312	1 Trichodesmium erythraeum IMS101, complete genome
All Bacteria (B)	>NC_008343	2 Granulibacter bethesdensis CGDNIH1, complete sequence
All Bacteria (B)	>NC_009879	1 Rickettsia canadensis str	McKiel, complete genome
All Bacteria (B)	>NC_008533	2 Streptococcus pneumoniae D39, complete sequence
All Bacteria (B)	>NC_008528	1 Oenococcus oeni PSU-1, complete genome
All Bacteria (B)	>NC_008529	1 Lactobacillus delbrueckii subsp	bulgaricus ATCC BAA-365, complete genome
All Bacteria (B)	>NC_008530	1 Lactobacillus gasseri ATCC 33323 = JCM 1131, complete sequence
All Bacteria (B)	>NC_008531	1 Leuconostoc mesenteroides subsp	mesenteroides ATCC 8293, complete genome
All Bacteria (B)	>NC_008496	1 Leuconostoc mesenteroides subsp	mesenteroides ATCC 8293 plasmid pLEUM1, complete sequence
All Bacteria (B)	>NC_008497	1 Lactobacillus brevis ATCC 367, complete genome
All Bacteria (B)	>NC_008498	1 Lactobacillus brevis ATCC 367 plasmid 1, complete sequence
All Bacteria (B)	>NC_008499	1 Lactobacillus brevis ATCC 367 plasmid 2, complete sequence
All Bacteria (B)	>NC_008532	1 Streptococcus thermophilus LMD-9, complete genome
All Bacteria (B)	>NC_008500	1 Streptococcus thermophilus LMD-9 plasmid 1, complete sequence
All Bacteria (B)	>NC_008501	1 Streptococcus thermophilus LMD-9 plasmid 2, complete sequence
All Bacteria (B)	>NC_008525	1 Pediococcus pentosaceus ATCC 25745, complete genome
All Bacteria (B)	>NC_008526	1 Lactobacillus paracasei ATCC 334 chromosome, complete genome
All Bacteria (B)	>NC_008502	1 Lactobacillus paracasei ATCC 334 plasmid 1, complete sequence
All Bacteria (B)	>NC_008527	1 Lactococcus lactis subsp	cremoris SK11, complete genome
All Bacteria (B)	>NC_008503	1 Lactococcus lactis subsp	cremoris SK11 plasmid 1, complete sequence
All Bacteria (B)	>NC_008504	1 Lactococcus lactis subsp	cremoris SK11 plasmid 2, complete sequence
All Bacteria (B)	>NC_008505	1 Lactococcus lactis subsp	cremoris SK11 plasmid 3, complete sequence
All Bacteria (B)	>NC_008506	1 Lactococcus lactis subsp	cremoris SK11 plasmid 4, complete sequence
All Bacteria (B)	>NC_008507	1 Lactococcus lactis subsp	cremoris SK11 plasmid 5, complete sequence
All Bacteria (B)	>NC_008268	1 Rhodococcus jostii RHA1, complete genome
All Bacteria (B)	>NC_008269	1 Rhodococcus jostii RHA1 plasmid pRHL1, complete sequence
All Bacteria (B)	>NC_008270	1 Rhodococcus jostii RHA1 plasmid pRHL2, complete sequence
All Bacteria (B)	>NC_008271	1 Rhodococcus jostii RHA1 plasmid pRHL3, complete sequence
All Bacteria (B)	>NC_008319	1 Synechococcus sp	CC9311, complete genome
All Bacteria (B)	>NC_008369	1 Francisella tularensis subsp	holarctica OSU18, complete genome
All Bacteria (B)	>NC_008463	1 Pseudomonas aeruginosa UCBPP-PA14, complete genome
All Bacteria (B)	>NC_008601	1 Francisella tularensis subsp	novicida U112, complete genome
All Bacteria (B)	>NC_008322	1 Shewanella sp	MR-7, complete genome
All Bacteria (B)	>NC_008320	1 Shewanella sp	MR-7, complete sequence
All Bacteria (B)	>NC_008321	1 Shewanella sp	MR-4, complete genome
All Bacteria (B)	>NC_008345	1 Shewanella frigidimarina NCIMB 400, complete genome
All Bacteria (B)	>NC_008346	1 Syntrophomonas wolfei subsp	wolfei str	Goettingen G311, complete genome
All Bacteria (B)	>NC_008347	1 Maricaulis maris MCS10, complete genome
All Bacteria (B)	>NC_008344	1 Nitrosomonas eutropha C91, complete genome
All Bacteria (B)	>NC_008341	1 Nitrosomonas eutropha C91 Plasmid1, complete sequence
All Bacteria (B)	>NC_008342	1 Nitrosomonas eutropha C91 Plasmid2, complete sequence
All Bacteria (B)	>NC_008340	1 Alkalilimnicola ehrlichii MLHE-1, complete genome
All Bacteria (B)	>NC_008570	1 Aeromonas hydrophila subsp	hydrophila ATCC 7966 chromosome, complete genome
All Bacteria (B)	>NC_008435	1 Rhodopseudomonas palustris BisA53, complete genome
All Bacteria (B)	>NC_008563	1 Escherichia coli APEC O1, complete genome
All Bacteria (B)	>NC_009837	1 Escherichia coli APEC O1 plasmid pAPEC-O1-ColBM, complete sequence
All Bacteria (B)	>NC_009838	1 Escherichia coli APEC O1 plasmid pAPEC-O1-R, complete sequence
All Bacteria (B)	>NC_008576	1 Magnetococcus marinus MC-1, complete sequence
All Bacteria (B)	>NC_011566	1 Shewanella piezotolerans WP3, complete genome
All Bacteria (B)	>NC_008536	1 Candidatus Solibacter usitatus Ellin6076, complete sequence
All Bacteria (B)	>NC_008711	1 Paenarthrobacter aurescens TC1, complete sequence
All Bacteria (B)	>NC_008712	1 Paenarthrobacter aurescens TC1 plasmid pTC1, complete sequence
All Bacteria (B)	>NC_008713	1 Paenarthrobacter aurescens TC1 plasmid pTC2, complete sequence
All Bacteria (B)	>NC_008554	1 Syntrophobacter fumaroxidans MPOB, complete genome
All Bacteria (B)	>NC_008595	1 Mycobacterium avium 104, complete genome
All Bacteria (B)	>NC_008596	1 Mycobacterium smegmatis str	MC2 155 chromosome, complete genome
All Bacteria (B)	>NC_008578	1 Acidothermus cellulolyticus 11B, complete genome
All Bacteria (B)	>NC_008609	1 Pelobacter propionicus DSM 2379, complete genome
All Bacteria (B)	>NC_008607	1 Pelobacter propionicus DSM 2379 plasmid pPRO1, complete sequence
All Bacteria (B)	>NC_008608	1 Pelobacter propionicus DSM 2379 plasmid pPRO2, complete sequence
All Bacteria (B)	>NC_008600	1 Bacillus thuringiensis str	Al Hakam, complete sequence
All Bacteria (B)	>NC_008598	1 Bacillus thuringiensis str	Al Hakam plasmid pALH1, complete sequence
All Bacteria (B)	>NC_008599	1 Campylobacter fetus subsp	fetus 82-40, complete genome
All Bacteria (B)	>NC_008610	1 Candidatus Ruthia magnifica str	Cm (Calyptogena magnifica), complete genome
All Bacteria (B)	>NC_008639	1 Chlorobium phaeobacteroides DSM 266, complete genome
All Bacteria (B)	>NC_009485	1 Bradyrhizobium sp	BTAi1, complete genome
All Bacteria (B)	>NC_009475	1 Bradyrhizobium sp	BTAi1 plasmid pBBta01, complete sequence
All Bacteria (B)	>NC_008750	1 Shewanella sp	W3-18-1, complete genome
All Bacteria (B)	>NC_008700	1 Shewanella amazonensis SB2B, complete genome
All Bacteria (B)	>NC_008699	1 Nocardioides sp	JS614, complete sequence
All Bacteria (B)	>NC_008697	1 Nocardioides sp	JS614 plasmid pNOCA01, complete sequence
All Bacteria (B)	>NC_008709	1 Psychromonas ingrahamii 37, complete genome
All Bacteria (B)	>NC_008726	1 Mycolicibacterium vanbaalenii PYR-1, complete sequence
All Bacteria (B)	>NC_008752	1 Acidovorax citrulli AAC00-1, complete genome
All Bacteria (B)	>NC_009446	1 Dichelobacter nodosus VCS1703A, complete genome
All Bacteria (B)	>NC_008740	1 Marinobacter hydrocarbonoclasticus VT8, complete sequence
All Bacteria (B)	>NC_008738	1 Marinobacter hydrocarbonoclasticus VT8 plasmid pMAQU01, complete sequence
All Bacteria (B)	>NC_008739	1 Marinobacter hydrocarbonoclasticus VT8 plasmid pMAQU02, complete sequence
All Bacteria (B)	>NC_010080	1 Lactobacillus helveticus DPC 4571, complete sequence
All Bacteria (B)	>NC_008705	1 Mycobacterium sp	KMS, complete genome
All Bacteria (B)	>NC_008703	1 Mycobacterium sp	KMS plasmid pMKMS01, complete sequence
All Bacteria (B)	>NC_008704	1 Mycobacterium sp	KMS plasmid pMKMS02, complete sequence
All Bacteria (B)	>NC_008783	1 Bartonella bacilliformis KC583, complete genome
All Bacteria (B)	>NC_008785	1 Burkholderia mallei SAVP1 chromosome I, complete sequence
All Bacteria (B)	>NC_008784	1 Burkholderia mallei SAVP1 chromosome II, complete sequence
All Bacteria (B)	>NC_008751	1 Desulfovibrio vulgaris DP4, complete genome
All Bacteria (B)	>NC_008741	1 Desulfovibrio vulgaris DP4 plasmid pDVUL01, complete sequence
All Bacteria (B)	>NC_008781	1 Polaromonas naphthalenivorans CJ2, complete genome
All Bacteria (B)	>NC_008757	1 Polaromonas naphthalenivorans CJ2 plasmid pPNAP01, complete sequence
All Bacteria (B)	>NC_008758	1 Polaromonas naphthalenivorans CJ2 plasmid pPNAP02, complete sequence
All Bacteria (B)	>NC_008759	1 Polaromonas naphthalenivorans CJ2 plasmid pPNAP03, complete sequence
All Bacteria (B)	>NC_008760	1 Polaromonas naphthalenivorans CJ2 plasmid pPNAP04, complete sequence
All Bacteria (B)	>NC_008761	1 Polaromonas naphthalenivorans CJ2 plasmid pPNAP05, complete sequence
All Bacteria (B)	>NC_008762	1 Polaromonas naphthalenivorans CJ2 plasmid pPNAP06, complete sequence
All Bacteria (B)	>NC_008763	1 Polaromonas naphthalenivorans CJ2 plasmid pPNAP07, complete sequence
All Bacteria (B)	>NC_008764	1 Polaromonas naphthalenivorans CJ2 plasmid pPNAP08, complete sequence
All Bacteria (B)	>NC_008787	1 Campylobacter jejuni subsp	jejuni 81-176, complete sequence
All Bacteria (B)	>NC_008790	1 Campylobacter jejuni subsp	jejuni 81-176 plasmid pTet, partial sequence
All Bacteria (B)	>NC_008770	1 Campylobacter jejuni subsp	jejuni 81-176 plasmid pVir, complete sequence
All Bacteria (B)	>NC_008782	1 Acidovorax sp	JS42, complete genome
All Bacteria (B)	>NC_008765	1 Acidovorax sp	JS42 plasmid pAOVO01, complete sequence
All Bacteria (B)	>NC_008766	1 Acidovorax sp	JS42 plasmid pAOVO02, complete sequence
All Bacteria (B)	>NC_008786	1 Verminephrobacter eiseniae EF01-2, complete genome
All Bacteria (B)	>NC_008771	1 Verminephrobacter eiseniae EF01-2 plasmid pVEIS01, complete sequence
All Bacteria (B)	>NC_008789	1 Halorhodospira halophila SL1, complete genome
All Bacteria (B)	>NC_008836	1 Burkholderia mallei NCTC 10229 chromosome I, complete sequence
All Bacteria (B)	>NC_008835	1 Burkholderia mallei NCTC 10229 chromosome II, complete sequence
All Bacteria (B)	>NC_009080	1 Burkholderia mallei NCTC 10247 chromosome I, complete sequence
All Bacteria (B)	>NC_009079	1 Burkholderia mallei NCTC 10247 chromosome II, complete sequence
All Bacteria (B)	>NC_008816	1 Prochlorococcus marinus str	AS9601, complete genome
All Bacteria (B)	>NC_008817	1 Prochlorococcus marinus str	MIT 9515, complete genome
All Bacteria (B)	>NC_008819	1 Prochlorococcus marinus str	NATL1A, complete genome
All Bacteria (B)	>NC_008825	1 Methylibium petroleiphilum PM1, complete sequence
All Bacteria (B)	>NC_008826	1 Methylibium petroleiphilum PM1 plasmid RPME01, complete sequence
All Bacteria (B)	>NC_009328	1 Geobacillus thermodenitrificans NG80-2, complete genome
All Bacteria (B)	>NC_009329	1 Geobacillus thermodenitrificans NG80-2 plasmid pLW1071, complete sequence
All Bacteria (B)	>NC_009725	2 Bacillus velezensis FZB42, complete sequence
All Bacteria (B)	>NC_009052	1 Shewanella baltica OS155, complete sequence
All Bacteria (B)	>NC_009035	1 Shewanella baltica OS155 plasmid pSbal01, complete sequence
All Bacteria (B)	>NC_009036	1 Shewanella baltica OS155 plasmid pSbal02, complete sequence
All Bacteria (B)	>NC_009037	1 Shewanella baltica OS155 plasmid pSbal03, complete sequence
All Bacteria (B)	>NC_009038	1 Shewanella baltica OS155 plasmid pSbal04, complete sequence
All Bacteria (B)	>NC_009012	1 Hungateiclostridium thermocellum ATCC 27405, complete sequence
All Bacteria (B)	>NC_009053	1 Actinobacillus pleuropneumoniae serovar 5b str	L20, complete sequence
All Bacteria (B)	>NC_009074	1 Burkholderia pseudomallei 668 chromosome I, complete sequence
All Bacteria (B)	>NC_009075	1 Burkholderia pseudomallei 668 chromosome II, complete sequence
All Bacteria (B)	>NC_009076	1 Burkholderia pseudomallei 1106a chromosome I, complete sequence
All Bacteria (B)	>NC_009078	1 Burkholderia pseudomallei 1106a chromosome II, complete sequence
All Bacteria (B)	>NC_009091	1 Prochlorococcus marinus str	MIT 9301, complete genome
All Bacteria (B)	>NC_009049	1 Rhodobacter sphaeroides ATCC 17029 chromosome 1, complete sequence
All Bacteria (B)	>NC_009050	1 Rhodobacter sphaeroides ATCC 17029 chromosome 2, complete sequence
All Bacteria (B)	>NC_009040	1 Rhodobacter sphaeroides ATCC 17029 plasmid pRSPH01, complete sequence
All Bacteria (B)	>NC_011080	1 Salmonella enterica subsp	enterica serovar Newport str	SL254, complete genome
All Bacteria (B)	>NC_011079	1 Salmonella enterica subsp	enterica serovar Newport str	SL254 plasmid pSL254_3, complete sequence
All Bacteria (B)	>NC_009140	1 Salmonella enterica subsp	enterica serovar Newport str	SL254 plasmid pSN254, complete sequence
All Bacteria (B)	>NC_009092	1 Shewanella loihica PV-4, complete sequence
All Bacteria (B)	>NC_009337	1 Chlorobium phaeovibrioides DSM 265, complete genome
All Bacteria (B)	>NC_009257	1 Francisella tularensis subsp	tularensis WY96-3418, complete genome
All Bacteria (B)	>NC_009525	1 Mycobacterium tuberculosis H37Ra, complete genome
All Bacteria (B)	>NC_009253	1 Desulfotomaculum reducens MI-1, complete genome
All Bacteria (B)	>NC_011420	2 Rhodospirillum centenum SW, complete genome
All Bacteria (B)	>NC_009456	1 Vibrio cholerae O395 chromosome 1, complete sequence
All Bacteria (B)	>NC_009457	1 Vibrio cholerae O395 chromosome 2, complete sequence
All Bacteria (B)	>NC_011985	1 Agrobacterium radiobacter K84 chromosome 1, complete sequence
All Bacteria (B)	>NC_011983	1 Agrobacterium radiobacter K84 chromosome 2, complete sequence
All Bacteria (B)	>NC_011994	1 Agrobacterium radiobacter K84 plasmid pAgK84, complete sequence
All Bacteria (B)	>NC_011990	1 Agrobacterium radiobacter K84 plasmid pAtK84b, complete sequence
All Bacteria (B)	>NC_011987	1 Agrobacterium radiobacter K84 plasmid pAtK84c, complete sequence
All Bacteria (B)	>NC_011989	1 Agrobacterium vitis S4 chromosome 1, complete sequence
All Bacteria (B)	>NC_011988	1 Agrobacterium vitis S4 chromosome 2, complete sequence
All Bacteria (B)	>NC_011986	1 Agrobacterium vitis S4 plasmid pAtS4a, complete sequence
All Bacteria (B)	>NC_011991	1 Agrobacterium vitis S4 plasmid pAtS4b, complete sequence
All Bacteria (B)	>NC_011984	1 Agrobacterium vitis S4 plasmid pAtS4c, complete sequence
All Bacteria (B)	>NC_011981	1 Agrobacterium vitis S4 plasmid pAtS4e, complete sequence
All Bacteria (B)	>NC_011982	1 Agrobacterium vitis S4 plasmid pTiS4, complete sequence
All Bacteria (B)	>NC_009648	1 Klebsiella pneumoniae subsp	pneumoniae MGH 78578, complete sequence
All Bacteria (B)	>NC_009649	1 Klebsiella pneumoniae subsp	pneumoniae MGH 78578 plasmid pKPN3, complete sequence
All Bacteria (B)	>NC_009650	1 Klebsiella pneumoniae subsp	pneumoniae MGH 78578 plasmid pKPN4, complete sequence
All Bacteria (B)	>NC_009651	1 Klebsiella pneumoniae subsp	pneumoniae MGH 78578 plasmid pKPN5, complete sequence
All Bacteria (B)	>NC_009652	1 Klebsiella pneumoniae subsp	pneumoniae MGH 78578 plasmid pKPN6, complete sequence
All Bacteria (B)	>NC_009653	1 Klebsiella pneumoniae subsp	pneumoniae MGH 78578 plasmid pKPN7, complete sequence
All Bacteria (B)	>NC_009436	1 Enterobacter sp	638, complete sequence
All Bacteria (B)	>NC_009425	1 Enterobacter sp	638 plasmid pENTE01, complete sequence
All Bacteria (B)	>NC_009379	1 Polynucleobacter asymbioticus QLW-P1DMWA-1, complete genome
All Bacteria (B)	>NC_009338	1 Mycolicibacterium gilvum PYR-GCK, complete sequence
All Bacteria (B)	>NC_009339	1 Mycolicibacterium gilvum PYR-GCK plasmid pMFLV01, complete sequence
All Bacteria (B)	>NC_009340	1 Mycolicibacterium gilvum PYR-GCK plasmid pMFLV02, complete sequence
All Bacteria (B)	>NC_009341	1 Mycolicibacterium gilvum PYR-GCK plasmid pMFLV03, complete sequence
All Bacteria (B)	>NC_009380	1 Salinispora tropica CNB-440, complete genome
All Bacteria (B)	>NC_009381	1 Yersinia pestis Pestoides F, complete genome
All Bacteria (B)	>NC_009377	1 Yersinia pestis Pestoides F plasmid CD, complete sequence
All Bacteria (B)	>NC_009378	1 Yersinia pestis Pestoides F plasmid MT, complete sequence
All Bacteria (B)	>NC_009566	1 Haemophilus influenzae PittEE, complete genome
All Bacteria (B)	>NC_009567	1 Haemophilus influenzae PittGG, complete genome
All Bacteria (B)	>NC_009706	1 Clostridium kluyveri DSM 555, complete genome
All Bacteria (B)	>NC_009466	1 Clostridium kluyveri DSM 555 plasmid pCKL555A, complete sequence
All Bacteria (B)	>NC_009437	1 Caldicellulosiruptor saccharolyticus DSM 8903, complete genome
All Bacteria (B)	>NC_009439	1 Pseudomonas mendocina ymp, complete genome
All Bacteria (B)	>NC_009438	1 Shewanella putrefaciens CN-32, complete sequence
All Bacteria (B)	>NC_009900	1 Rickettsia massiliae MTU5, complete genome
All Bacteria (B)	>NC_009897	1 Rickettsia massiliae MTU5 plasmid pRMA, complete sequence
All Bacteria (B)	>NC_009441	1 Flavobacterium johnsoniae UW101, complete genome
All Bacteria (B)	>NC_009523	1 Roseiflexus sp	RS-1, complete genome
All Bacteria (B)	>NC_010278	1 Actinobacillus pleuropneumoniae serovar 3 str	JL03, complete genome
All Bacteria (B)	>NC_009455	1 Dehalococcoides mccartyi BAV1, complete sequence
All Bacteria (B)	>NC_009484	1 Acidiphilium cryptum JF-5, complete genome
All Bacteria (B)	>NC_009467	1 Acidiphilium cryptum JF-5 plasmid pACRY01, complete sequence
All Bacteria (B)	>NC_009468	1 Acidiphilium cryptum JF-5 plasmid pACRY02, complete sequence
All Bacteria (B)	>NC_009469	1 Acidiphilium cryptum JF-5 plasmid pACRY03, complete sequence
All Bacteria (B)	>NC_009470	1 Acidiphilium cryptum JF-5 plasmid pACRY04, complete sequence
All Bacteria (B)	>NC_009471	1 Acidiphilium cryptum JF-5 plasmid pACRY05, complete sequence
All Bacteria (B)	>NC_009472	1 Acidiphilium cryptum JF-5 plasmid pACRY06, complete sequence
All Bacteria (B)	>NC_009473	1 Acidiphilium cryptum JF-5 plasmid pACRY07, complete sequence
All Bacteria (B)	>NC_009474	1 Acidiphilium cryptum JF-5 plasmid pACRY08, complete sequence
All Bacteria (B)	>NC_009483	1 Geobacter uraniireducens Rf4, complete genome
All Bacteria (B)	>NC_009511	1 Sphingomonas wittichii RW1, complete sequence
All Bacteria (B)	>NC_009507	1 Sphingomonas wittichii RW1 plasmid pSWIT01, complete sequence
All Bacteria (B)	>NC_009508	1 Sphingomonas wittichii RW1 plasmid pSWIT02, complete sequence
All Bacteria (B)	>NC_009486	1 Thermotoga petrophila RKU-1, complete genome
All Bacteria (B)	>NC_009487	1 Staphylococcus aureus subsp	aureus JH9, complete genome
All Bacteria (B)	>NC_009477	1 Staphylococcus aureus subsp	aureus JH9 plasmid pSJH901, complete sequence
All Bacteria (B)	>NC_009513	1 Lactobacillus reuteri DSM 20016, complete genome
All Bacteria (B)	>NC_009505	1 Brucella ovis ATCC 25840 chromosome I, complete sequence
All Bacteria (B)	>NC_009504	1 Brucella ovis ATCC 25840 chromosome II, complete sequence
All Bacteria (B)	>NC_009512	1 Pseudomonas putida F1, complete genome
All Bacteria (B)	>NC_009524	1 Psychrobacter sp	PRwf-1, complete sequence
All Bacteria (B)	>NC_009516	1 Psychrobacter sp	PRwf-1 plasmid pRWF101, complete sequence
All Bacteria (B)	>NC_009517	1 Psychrobacter sp	PRwf-1 plasmid pRWF102, complete sequence
All Bacteria (B)	>NC_009616	1 Thermosipho melanesiensis BI429, complete genome
All Bacteria (B)	>NC_009565	1 Mycobacterium tuberculosis F11, complete genome
All Bacteria (B)	>NC_009708	1 Yersinia pseudotuberculosis IP 31758, complete genome
All Bacteria (B)	>NC_009705	1 Yersinia pseudotuberculosis IP 31758 plasmid plasmid_153kb, complete sequence
All Bacteria (B)	>NC_009704	1 Yersinia pseudotuberculosis IP 31758 plasmid plasmid_59kb, complete sequence
All Bacteria (B)	>NC_009617	1 Clostridium beijerinckii NCIMB 8052, complete genome
All Bacteria (B)	>NC_009633	1 Alkaliphilus metalliredigens QYMF, complete genome
All Bacteria (B)	>NC_009785	1 Streptococcus gordonii str	Challis substr	CH1, complete genome
All Bacteria (B)	>NC_009697	1 Clostridium botulinum A str	ATCC 19397, complete genome
All Bacteria (B)	>NC_009698	1 Clostridium botulinum A str	Hall chromosome, complete genome
All Bacteria (B)	>NC_009699	1 Clostridium botulinum F str	Langeland, complete genome
All Bacteria (B)	>NC_009700	1 Clostridium botulinum F str	Langeland plasmid pCLI, complete sequence
All Bacteria (B)	>NC_010079	1 Staphylococcus aureus subsp	aureus USA300_TCH1516, complete genome
All Bacteria (B)	>NC_012417	1 Staphylococcus aureus subsp	aureus USA300_TCH1516 plasmid pUSA01-HOU, complete sequence
All Bacteria (B)	>NC_010063	1 Staphylococcus aureus subsp	aureus USA300_TCH1516 plasmid pUSA300HOUMR, complete sequence
All Bacteria (B)	>NC_009727	1 Coxiella burnetii Dugway 5J108-111, complete sequence
All Bacteria (B)	>NC_009726	1 Coxiella burnetii Dugway 5J108-111 plasmid pQpDG, complete sequence
All Bacteria (B)	>NC_009632	1 Staphylococcus aureus subsp	aureus JH1, complete genome
All Bacteria (B)	>NC_009619	1 Staphylococcus aureus subsp	aureus JH1 plasmid pSJH101, complete sequence
All Bacteria (B)	>NC_009636	1 Sinorhizobium medicae WSM419 chromosome, complete genome
All Bacteria (B)	>NC_009620	1 Sinorhizobium medicae WSM419 plasmid pSMED01, complete sequence
All Bacteria (B)	>NC_009621	1 Sinorhizobium medicae WSM419 plasmid pSMED02, complete sequence
All Bacteria (B)	>NC_009622	1 Sinorhizobium medicae WSM419 plasmid pSMED03, complete sequence
All Bacteria (B)	>NC_009656	1 Pseudomonas aeruginosa PA7, complete genome
All Bacteria (B)	>NC_009655	1 Actinobacillus succinogenes 130Z, complete genome
All Bacteria (B)	>NC_011144	1 Phenylobacterium zucineum HLK1, complete genome
All Bacteria (B)	>NC_011143	1 Phenylobacterium zucineum HLK1 plasmid, complete sequence
All Bacteria (B)	>NC_009654	1 Marinomonas sp	MWYL1, complete genome
All Bacteria (B)	>NC_009664	2 Kineococcus radiotolerans SRS30216 = ATCC BAA-149, complete sequence
All Bacteria (B)	>NC_009806	1 Kineococcus radiotolerans SRS30216 = ATCC BAA-149 plasmid pKRAD01, complete sequence
All Bacteria (B)	>NC_009660	1 Kineococcus radiotolerans SRS30216 = ATCC BAA-149 plasmid pKRAD02, complete sequence
All Bacteria (B)	>NC_009665	1 Shewanella baltica OS185, complete genome
All Bacteria (B)	>NC_009661	1 Shewanella baltica OS185 plasmid pS18501, complete sequence
All Bacteria (B)	>NC_009667	1 Ochrobactrum anthropi ATCC 49188 chromosome 1, complete sequence
All Bacteria (B)	>NC_009668	1 Ochrobactrum anthropi ATCC 49188 chromosome 2, complete sequence
All Bacteria (B)	>NC_009669	1 Ochrobactrum anthropi ATCC 49188 plasmid pOANT01, complete sequence
All Bacteria (B)	>NC_009670	1 Ochrobactrum anthropi ATCC 49188 plasmid pOANT02, complete sequence
All Bacteria (B)	>NC_009671	1 Ochrobactrum anthropi ATCC 49188 plasmid pOANT03, complete sequence
All Bacteria (B)	>NC_009672	1 Ochrobactrum anthropi ATCC 49188 plasmid pOANT04, complete sequence
All Bacteria (B)	>NC_009674	1 Bacillus cytotoxicus NVH 391-98, complete genome
All Bacteria (B)	>NC_009673	1 Bacillus cytotoxicus NVH 391-98 plasmid pBC9801, complete sequence
All Bacteria (B)	>NC_010263	3 Rickettsia rickettsii str	Iowa, complete genome
All Bacteria (B)	>NC_009715	2 Campylobacter curvus 525	92, complete genome
All Bacteria (B)	>NC_009707	1 Campylobacter jejuni subsp	doylei 269	97, complete genome
All Bacteria (B)	>NC_009675	1 Anaeromyxobacter sp	Fw109-5, complete sequence
All Bacteria (B)	>NC_009718	1 Fervidobacterium nodosum Rt17-B1, complete genome
All Bacteria (B)	>NC_009719	1 Parvibaculum lavamentivorans DS-1, complete genome
All Bacteria (B)	>NC_009714	1 Campylobacter hominis ATCC BAA-381, complete genome
All Bacteria (B)	>NC_009713	1 Campylobacter hominis ATCC BAA-381 plasmid pCH4, complete sequence
All Bacteria (B)	>NC_010842	1 Leptospira biflexa serovar Patoc strain 'Patoc 1 (Ames)' chromosome I, complete sequence
All Bacteria (B)	>NC_010845	1 Leptospira biflexa serovar Patoc strain 'Patoc 1 (Ames)' chromosome II, complete sequence
All Bacteria (B)	>NC_010846	1 Leptospira biflexa serovar Patoc strain 'Patoc 1 (Ames)' plasmid p74, complete sequence
All Bacteria (B)	>NC_009720	1 Xanthobacter autotrophicus Py2, complete genome
All Bacteria (B)	>NC_009717	1 Xanthobacter autotrophicus Py2 plasmid pXAUT01, complete sequence
All Bacteria (B)	>NC_009778	1 Cronobacter sakazakii ATCC BAA-894, complete genome
All Bacteria (B)	>NC_009779	1 Cronobacter sakazakii ATCC BAA-894 plasmid pESA2, complete sequence
All Bacteria (B)	>NC_009780	1 Cronobacter sakazakii ATCC BAA-894 plasmid pESA3, complete sequence
All Bacteria (B)	>NC_010602	1 Leptospira biflexa serovar Patoc strain 'Patoc 1 (Paris)' chromosome I, complete sequence
All Bacteria (B)	>NC_010843	1 Leptospira biflexa serovar Patoc strain 'Patoc 1 (Paris)' chromosome II, complete sequence
All Bacteria (B)	>NC_010844	1 Leptospira biflexa serovar Patoc strain 'Patoc 1 (Paris)' plasmid p74, complete sequence
All Bacteria (B)	>NC_009783	1 Vibrio campbellii ATCC BAA-1116 chromosome I, complete sequence
All Bacteria (B)	>NC_009784	1 Vibrio campbellii ATCC BAA-1116 chromosome II, complete sequence
All Bacteria (B)	>NC_009777	1 Vibrio campbellii ATCC BAA-1116 plasmid pVIBHAR, complete sequence
All Bacteria (B)	>NC_009802	2 Campylobacter concisus 13826, complete genome
All Bacteria (B)	>NC_009796	1 Campylobacter concisus 13826 plasmid pCCON16, complete sequence
All Bacteria (B)	>NC_009795	1 Campylobacter concisus 13826 plasmid pCCON31, complete sequence
All Bacteria (B)	>NC_009801	1 Escherichia coli E24377A, complete genome
All Bacteria (B)	>NC_009787	1 Escherichia coli E24377A plasmid pETEC_35, complete sequence
All Bacteria (B)	>NC_009791	1 Escherichia coli E24377A plasmid pETEC_5, complete sequence
All Bacteria (B)	>NC_009789	1 Escherichia coli E24377A plasmid pETEC_6, complete sequence
All Bacteria (B)	>NC_009788	1 Escherichia coli E24377A plasmid pETEC_73, complete sequence
All Bacteria (B)	>NC_009790	1 Escherichia coli E24377A plasmid pETEC_74, complete sequence
All Bacteria (B)	>NC_009786	1 Escherichia coli E24377A plasmid pETEC_80, complete sequence
All Bacteria (B)	>NC_009800	1 Escherichia coli HS, complete genome
All Bacteria (B)	>NC_009749	1 Francisella tularensis subsp	holarctica FTNF002-00, complete genome
All Bacteria (B)	>NC_009767	1 Roseiflexus castenholzii DSM 13941, complete genome
All Bacteria (B)	>NC_010546	1 Crocosphaera subtropica ATCC 51142 chromosome circular, complete sequence
All Bacteria (B)	>NC_010547	1 Crocosphaera subtropica ATCC 51142 chromosome linear, complete sequence
All Bacteria (B)	>NC_010539	1 Crocosphaera subtropica ATCC 51142 plasmid A, complete sequence
All Bacteria (B)	>NC_010541	1 Crocosphaera subtropica ATCC 51142 plasmid B, complete sequence
All Bacteria (B)	>NC_010542	1 Crocosphaera subtropica ATCC 51142 plasmid C, complete sequence
All Bacteria (B)	>NC_010543	1 Crocosphaera subtropica ATCC 51142 plasmid D, complete sequence
All Bacteria (B)	>NC_009828	1 Pseudothermotoga lettingae TMO, complete sequence
All Bacteria (B)	>NC_009848	4 Bacillus pumilus SAFR-032, complete sequence
All Bacteria (B)	>NC_009839	1 Campylobacter jejuni subsp	jejuni 81116, complete genome
All Bacteria (B)	>NC_010382	1 Lysinibacillus sphaericus C3-41, complete genome
All Bacteria (B)	>NC_010381	1 Lysinibacillus sphaericus C3-41 plasmid pBsph, complete sequence
All Bacteria (B)	>NC_012967	1 Escherichia coli B str	REL606, complete genome
All Bacteria (B)	>NC_009921	1 Frankia sp	EAN1pec, complete genome
All Bacteria (B)	>NC_009831	1 Shewanella sediminis HAW-EB3, complete sequence
All Bacteria (B)	>NC_009792	1 Citrobacter koseri ATCC BAA-895, complete genome
All Bacteria (B)	>NC_009794	1 Citrobacter koseri ATCC BAA-895 plasmid pCKO2, complete sequence
All Bacteria (B)	>NC_009793	1 Citrobacter koseri ATCC BAA-895 plasmid pCKO3, complete sequence
All Bacteria (B)	>NC_009840	1 Prochlorococcus marinus str	MIT 9215, complete genome
All Bacteria (B)	>NC_009832	1 Serratia proteamaculans 568, complete genome
All Bacteria (B)	>NC_009829	1 Serratia proteamaculans 568 plasmid pSPRO01, complete sequence
All Bacteria (B)	>NC_009925	1 Acaryochloris marina MBIC11017, complete genome
All Bacteria (B)	>NC_009926	1 Acaryochloris marina MBIC11017 plasmid pREB1, complete sequence
All Bacteria (B)	>NC_009927	1 Acaryochloris marina MBIC11017 plasmid pREB2, complete sequence
All Bacteria (B)	>NC_009928	1 Acaryochloris marina MBIC11017 plasmid pREB3, complete sequence
All Bacteria (B)	>NC_009929	1 Acaryochloris marina MBIC11017 plasmid pREB4, complete sequence
All Bacteria (B)	>NC_009930	1 Acaryochloris marina MBIC11017 plasmid pREB5, complete sequence
All Bacteria (B)	>NC_009931	1 Acaryochloris marina MBIC11017 plasmid pREB6, complete sequence
All Bacteria (B)	>NC_009932	1 Acaryochloris marina MBIC11017 plasmid pREB7, complete sequence
All Bacteria (B)	>NC_009933	1 Acaryochloris marina MBIC11017 plasmid pREB8, complete sequence
All Bacteria (B)	>NC_009934	1 Acaryochloris marina MBIC11017 plasmid pREB9, complete sequence
All Bacteria (B)	>NC_011375	1 Streptococcus pyogenes NZ131, complete genome
All Bacteria (B)	>NC_009952	1 Dinoroseobacter shibae DFL 12 = DSM 16493, complete sequence
All Bacteria (B)	>NC_009955	1 Dinoroseobacter shibae DFL 12 = DSM 16493 plasmid pDSHI01, complete sequence
All Bacteria (B)	>NC_009956	1 Dinoroseobacter shibae DFL 12 = DSM 16493 plasmid pDSHI02, complete sequence
All Bacteria (B)	>NC_009957	1 Dinoroseobacter shibae DFL 12 = DSM 16493 plasmid pDSHI03, complete sequence
All Bacteria (B)	>NC_009958	1 Dinoroseobacter shibae DFL 12 = DSM 16493 plasmid pDSHI04, complete sequence
All Bacteria (B)	>NC_009959	1 Dinoroseobacter shibae DFL 12 = DSM 16493 plasmid pDSHI05, complete sequence
All Bacteria (B)	>NC_017617	1 Streptococcus suis GZ1, complete genome
All Bacteria (B)	>NC_009881	1 Rickettsia akari str	Hartford, complete genome
All Bacteria (B)	>NC_009882	1 Rickettsia rickettsii str	'Sheila Smith', complete genome
All Bacteria (B)	>NC_009883	1 Rickettsia bellii OSU 85-389, complete genome
All Bacteria (B)	>NC_009953	1 Salinispora arenicola CNS-205, complete genome
All Bacteria (B)	>NC_009901	1 Shewanella pealeana ATCC 700345, complete sequence
All Bacteria (B)	>NC_009922	1 Alkaliphilus oremlandii OhILAs, complete genome
All Bacteria (B)	>NC_010612	1 Mycobacterium marinum M, complete genome
All Bacteria (B)	>NC_010604	1 Mycobacterium marinum M plasmid pMM23, complete sequence
All Bacteria (B)	>NC_012125	1 Salmonella enterica subsp	enterica serovar Paratyphi C str	RKS4594, complete sequence
All Bacteria (B)	>NC_012124	1 Salmonella enterica subsp	enterica serovar Paratyphi C str	RKS4594 plasmid pSPCV, complete sequence
All Bacteria (B)	>NC_009943	1 Desulfococcus oleovorans Hxd3, complete genome
All Bacteria (B)	>NC_010424	1 Candidatus Desulforudis audaxviator MP104C, complete genome
All Bacteria (B)	>NC_010611	1 Acinetobacter baumannii ACICU, complete genome
All Bacteria (B)	>NC_010605	1 Acinetobacter baumannii ACICU plasmid pACICU1, complete sequence
All Bacteria (B)	>NC_010606	1 Acinetobacter baumannii ACICU plasmid pACICU2, complete sequence
All Bacteria (B)	>NC_010084	1 Burkholderia multivorans ATCC 17616 chromosome 1, complete sequence
All Bacteria (B)	>NC_010086	1 Burkholderia multivorans ATCC 17616 chromosome 2, complete sequence
All Bacteria (B)	>NC_010087	1 Burkholderia multivorans ATCC 17616 chromosome 3, complete sequence
All Bacteria (B)	>NC_010070	1 Burkholderia multivorans ATCC 17616 plasmid pBMUL01, complete sequence
All Bacteria (B)	>NC_010103	1 Brucella canis ATCC 23365 chromosome I, complete sequence
All Bacteria (B)	>NC_010104	1 Brucella canis ATCC 23365 chromosome II, complete sequence
All Bacteria (B)	>NC_012587	1 Sinorhizobium fredii NGR234 chromosome, complete genome
All Bacteria (B)	>NC_000914	2 Sinorhizobium fredii NGR234 plasmid pNGR234a, complete sequence
All Bacteria (B)	>NC_012586	1 Sinorhizobium fredii NGR234 plasmid pNGR234b, complete sequence
All Bacteria (B)	>NC_010003	1 Petrotoga mobilis SJ95, complete genome
All Bacteria (B)	>NC_010067	1 Salmonella enterica subsp	arizonae serovar 62:z4,z23:--, complete genome
All Bacteria (B)	>NC_010002	1 Delftia acidovorans SPH-1, complete genome
All Bacteria (B)	>NC_010001	1 Lachnoclostridium phytofermentans ISDg, complete sequence
All Bacteria (B)	>NC_010102	1 Salmonella enterica subsp	enterica serovar Paratyphi B str	SPB7, complete genome
All Bacteria (B)	>NC_010742	1 Brucella abortus S19 chromosome 1, complete sequence
All Bacteria (B)	>NC_010740	1 Brucella abortus S19 chromosome 2, complete sequence
All Bacteria (B)	>NC_010117	1 Coxiella burnetii RSA 331, complete genome
All Bacteria (B)	>NC_010115	1 Coxiella burnetii RSA 331 plasmid QpH1, complete sequence
All Bacteria (B)	>NC_009997	1 Shewanella baltica OS195, complete sequence
All Bacteria (B)	>NC_009998	1 Shewanella baltica OS195 plasmid pS19501, complete sequence
All Bacteria (B)	>NC_009999	1 Shewanella baltica OS195 plasmid pS19502, complete sequence
All Bacteria (B)	>NC_010000	1 Shewanella baltica OS195 plasmid pS19503, complete sequence
All Bacteria (B)	>NC_010163	1 Acholeplasma laidlawii PG-8A, complete sequence
All Bacteria (B)	>NC_010159	1 Yersinia pestis Angola, complete genome
All Bacteria (B)	>NC_010157	1 Yersinia pestis Angola plasmid new_pCD, complete sequence
All Bacteria (B)	>NC_010158	1 Yersinia pestis Angola plasmid pMT-pPCP, complete sequence
All Bacteria (B)	>NC_010184	1 Bacillus mycoides KBAB4, complete sequence
All Bacteria (B)	>NC_010180	1 Bacillus mycoides KBAB4 plasmid pBWB401, complete sequence
All Bacteria (B)	>NC_010181	1 Bacillus mycoides KBAB4 plasmid pBWB402, complete sequence
All Bacteria (B)	>NC_010182	1 Bacillus mycoides KBAB4 plasmid pBWB403, complete sequence
All Bacteria (B)	>NC_010183	1 Bacillus mycoides KBAB4 plasmid pBWB404, complete sequence
All Bacteria (B)	>NC_010172	1 Methylorubrum extorquens PA1, complete sequence
All Bacteria (B)	>NC_010175	1 Chloroflexus aurantiacus J-10-fl chromosome, complete genome
All Bacteria (B)	>NC_010168	1 Renibacterium salmoninarum ATCC 33209, complete genome
All Bacteria (B)	>NC_010169	1 Brucella suis ATCC 23445 chromosome I, complete sequence
All Bacteria (B)	>NC_010167	1 Brucella suis ATCC 23445 chromosome II, complete sequence
All Bacteria (B)	>NC_010677	1 Francisella tularensis subsp	mediasiatica FSC147, complete genome
All Bacteria (B)	>NC_011978	1 Thermotoga neapolitana DSM 4359, complete genome
All Bacteria (B)	>NC_012468	1 Streptococcus pneumoniae 70585, complete genome
All Bacteria (B)	>NC_012466	1 Streptococcus pneumoniae JJA, complete genome
All Bacteria (B)	>NC_012467	1 Streptococcus pneumoniae P1031, complete genome
All Bacteria (B)	>NC_012469	1 Streptococcus pneumoniae Taiwan19F-14, complete genome
All Bacteria (B)	>NC_011567	1 Anoxybacillus flavithermus WK1, complete genome
All Bacteria (B)	>NC_010320	1 Thermoanaerobacter sp	X514, complete genome
All Bacteria (B)	>NC_010321	1 Thermoanaerobacter pseudethanolicus ATCC 33223, complete genome
All Bacteria (B)	>NC_010322	1 Pseudomonas putida GB-1, complete sequence
All Bacteria (B)	>NC_010338	1 Caulobacter sp	K31, complete sequence
All Bacteria (B)	>NC_010335	1 Caulobacter sp	K31 plasmid pCAUL01, complete sequence
All Bacteria (B)	>NC_010333	1 Caulobacter sp	K31 plasmid pCAUL02, complete sequence
All Bacteria (B)	>NC_010337	2 Heliobacterium modesticaldum Ice1 strain Ice1, complete genome
All Bacteria (B)	>NC_010334	1 Shewanella halifaxensis HAW-EB4, complete sequence
All Bacteria (B)	>NC_012039	1 Campylobacter lari RM2100, complete sequence
All Bacteria (B)	>NC_012040	1 Campylobacter lari RM2100 megaplasmid pCL2100, complete sequence
All Bacteria (B)	>NC_010995	1 Cellvibrio japonicus Ueda107, complete sequence
All Bacteria (B)	>NC_014334	2 Lactobacillus paracasei, complete sequence
All Bacteria (B)	>NC_011352	1 Lactobacillus paracasei plasmid plca36, complete sequence
All Bacteria (B)	>NC_010380	1 Streptococcus pneumoniae Hungary19A-6, complete genome
All Bacteria (B)	>NC_010336	1 Francisella philomiragia subsp	philomiragia ATCC 25017, complete genome
All Bacteria (B)	>NC_010331	1 Francisella philomiragia subsp	philomiragia ATCC 25017 plasmid pFPHI01, complete sequence
All Bacteria (B)	>NC_010516	1 Clostridium botulinum B1 str	Okra, complete sequence
All Bacteria (B)	>NC_010379	1 Clostridium botulinum B1 str	Okra plasmid pCLD, complete sequence
All Bacteria (B)	>NC_010513	1 Xylella fastidiosa M12, complete sequence
All Bacteria (B)	>NC_010503	1 Ureaplasma parvum serovar 3 str	ATCC 27815, complete genome
All Bacteria (B)	>NC_010511	1 Methylobacterium sp	4-46, complete sequence
All Bacteria (B)	>NC_010373	1 Methylobacterium sp	4-46 plasmid pM44601, complete sequence
All Bacteria (B)	>NC_010374	1 Methylobacterium sp	4-46 plasmid pM44602, complete sequence
All Bacteria (B)	>NC_010468	1 Escherichia coli ATCC 8739, complete genome
All Bacteria (B)	>NC_010519	1 Histophilus somni 2336, complete sequence
All Bacteria (B)	>NC_010473	1 Escherichia coli str	K-12 substr	DH10B, complete sequence
All Bacteria (B)	>NC_010501	1 Pseudomonas putida W619, complete sequence
All Bacteria (B)	>NC_010465	1 Yersinia pseudotuberculosis YPIII, complete genome
All Bacteria (B)	>NC_010475	1 Synechococcus sp	PCC 7002, complete genome
All Bacteria (B)	>NC_010476	1 Synechococcus sp	PCC 7002 plasmid pAQ1, complete sequence
All Bacteria (B)	>NC_010477	1 Synechococcus sp	PCC 7002 plasmid pAQ3, complete sequence
All Bacteria (B)	>NC_010478	1 Synechococcus sp	PCC 7002 plasmid pAQ4, complete sequence
All Bacteria (B)	>NC_010479	1 Synechococcus sp	PCC 7002 plasmid pAQ5, complete sequence
All Bacteria (B)	>NC_010480	1 Synechococcus sp	PCC 7002 plasmid pAQ6, complete sequence
All Bacteria (B)	>NC_010474	1 Synechococcus sp	PCC 7002 plasmid pAQ7, complete sequence
All Bacteria (B)	>NC_010508	1 Burkholderia cenocepacia MC0-3 chromosome 1, complete sequence
All Bacteria (B)	>NC_010515	1 Burkholderia cenocepacia MC0-3 chromosome 2, complete sequence
All Bacteria (B)	>NC_010512	1 Burkholderia cenocepacia MC0-3 chromosome 3, complete sequence
All Bacteria (B)	>NC_010506	1 Shewanella woodyi ATCC 51908, complete genome
All Bacteria (B)	>NC_010520	1 Clostridium botulinum A3 str	Loch Maree, complete sequence
All Bacteria (B)	>NC_010418	1 Clostridium botulinum A3 str	Loch Maree plasmid pCLK, complete sequence
All Bacteria (B)	>NC_011283	1 Klebsiella variicola strain 342, complete genome
All Bacteria (B)	>NC_011282	1 Klebsiella variicola strain 342 plasmid pKP187, complete sequence
All Bacteria (B)	>NC_011281	1 Klebsiella variicola strain 342 plasmid pKP91, complete sequence
All Bacteria (B)	>NC_010717	2 Xanthomonas oryzae pv	oryzae PXO99A, complete genome
All Bacteria (B)	>NC_010483	1 Thermotoga sp	RQ2, complete sequence
All Bacteria (B)	>NC_010498	1 Escherichia coli SMS-3-5, complete genome
All Bacteria (B)	>NC_010488	1 Escherichia coli SMS-3-5 plasmid pSMS35_130, complete sequence
All Bacteria (B)	>NC_010487	1 Escherichia coli SMS-3-5 plasmid pSMS35_3, complete sequence
All Bacteria (B)	>NC_010486	1 Escherichia coli SMS-3-5 plasmid pSMS35_4, complete sequence
All Bacteria (B)	>NC_010485	1 Escherichia coli SMS-3-5 plasmid pSMS35_8, complete sequence
All Bacteria (B)	>NC_010794	1 Methylacidiphilum infernorum V4, complete genome
All Bacteria (B)	>NC_011229	1 Borrelia duttonii Ly, complete sequence
All Bacteria (B)	>NC_011224	1 Borrelia duttonii Ly plasmid pl11, complete sequence
All Bacteria (B)	>NC_011226	1 Borrelia duttonii Ly plasmid pl15, complete sequence
All Bacteria (B)	>NC_011247	1 Borrelia duttonii Ly plasmid pl165, complete sequence
All Bacteria (B)	>NC_011257	1 Borrelia duttonii Ly plasmid pl23, complete sequence
All Bacteria (B)	>NC_011259	1 Borrelia duttonii Ly plasmid pl23b, complete sequence
All Bacteria (B)	>NC_011261	1 Borrelia duttonii Ly plasmid pl26, complete sequence
All Bacteria (B)	>NC_011265	1 Borrelia duttonii Ly plasmid pl27, complete sequence
All Bacteria (B)	>NC_011245	1 Borrelia duttonii Ly plasmid pl28, complete sequence
All Bacteria (B)	>NC_011262	1 Borrelia duttonii Ly plasmid pl31, complete sequence
All Bacteria (B)	>NC_011264	1 Borrelia duttonii Ly plasmid pl32, complete sequence
All Bacteria (B)	>NC_011248	1 Borrelia duttonii Ly plasmid pl35, complete sequence
All Bacteria (B)	>NC_011249	1 Borrelia duttonii Ly plasmid pl36, complete sequence
All Bacteria (B)	>NC_011250	1 Borrelia duttonii Ly plasmid pl40, complete sequence
All Bacteria (B)	>NC_011251	1 Borrelia duttonii Ly plasmid pl41, complete sequence
All Bacteria (B)	>NC_011254	1 Borrelia duttonii Ly plasmid pl42, complete sequence
All Bacteria (B)	>NC_011256	1 Borrelia duttonii Ly plasmid pl70, complete sequence
All Bacteria (B)	>NC_011244	1 Borrelia recurrentis A1, complete genome
All Bacteria (B)	>NC_011246	1 Borrelia recurrentis A1 plasmid pl124, complete sequence
All Bacteria (B)	>NC_011252	1 Borrelia recurrentis A1 plasmid pl23, complete sequence
All Bacteria (B)	>NC_011253	1 Borrelia recurrentis A1 plasmid pl33, complete sequence
All Bacteria (B)	>NC_011255	1 Borrelia recurrentis A1 plasmid pl35, complete sequence
All Bacteria (B)	>NC_011258	1 Borrelia recurrentis A1 plasmid pl37, complete sequence
All Bacteria (B)	>NC_011260	1 Borrelia recurrentis A1 plasmid pl53, complete sequence
All Bacteria (B)	>NC_011263	1 Borrelia recurrentis A1 plasmid pl6, complete sequence
All Bacteria (B)	>NC_010505	1 Methylobacterium radiotolerans JCM 2831, complete sequence
All Bacteria (B)	>NC_010510	1 Methylobacterium radiotolerans JCM 2831 plasmid pMRAD01, complete sequence
All Bacteria (B)	>NC_010509	1 Methylobacterium radiotolerans JCM 2831 plasmid pMRAD02, complete sequence
All Bacteria (B)	>NC_010514	1 Methylobacterium radiotolerans JCM 2831 plasmid pMRAD03, complete sequence
All Bacteria (B)	>NC_010517	1 Methylobacterium radiotolerans JCM 2831 plasmid pMRAD04, complete sequence
All Bacteria (B)	>NC_010518	1 Methylobacterium radiotolerans JCM 2831 plasmid pMRAD05, complete sequence
All Bacteria (B)	>NC_010502	1 Methylobacterium radiotolerans JCM 2831 plasmid pMRAD06, complete sequence
All Bacteria (B)	>NC_010504	1 Methylobacterium radiotolerans JCM 2831 plasmid pMRAD07, complete sequence
All Bacteria (B)	>NC_010507	1 Methylobacterium radiotolerans JCM 2831 plasmid pMRAD08, complete sequence
All Bacteria (B)	>NC_010531	1 Polynucleobacter necessarius STIR1, complete sequence
All Bacteria (B)	>NC_010577	1 Xylella fastidiosa M23, complete genome
All Bacteria (B)	>NC_010579	1 Xylella fastidiosa M23 plasmid pXFAS01, complete sequence
All Bacteria (B)	>NC_010524	1 Leptothrix cholodnii SP-6, complete sequence
All Bacteria (B)	>NC_011072	1 Streptococcus pneumoniae G54, complete genome
All Bacteria (B)	>NC_010581	1 Beijerinckia indica subsp	indica ATCC 9039, complete sequence
All Bacteria (B)	>NC_010580	1 Beijerinckia indica subsp	indica ATCC 9039 plasmid pBIND01, complete sequence
All Bacteria (B)	>NC_010578	1 Beijerinckia indica subsp	indica ATCC 9039 plasmid pBIND02, complete sequence
All Bacteria (B)	>NC_011527	1 Coxiella burnetii CbuG_Q212, complete sequence
All Bacteria (B)	>NC_011528	1 Coxiella burnetii CbuK_Q154, complete sequence
All Bacteria (B)	>NC_011526	1 Coxiella burnetii CbuK_Q154 plasmid pQpRS_K_Q154, complete sequence
All Bacteria (B)	>NC_010556	1 Exiguobacterium sibiricum 255-15, complete genome
All Bacteria (B)	>NC_010549	1 Exiguobacterium sibiricum 255-15 plasmid pEXIG01, complete sequence
All Bacteria (B)	>NC_010550	1 Exiguobacterium sibiricum 255-15 plasmid pEXIG02, complete sequence
All Bacteria (B)	>NC_010551	1 Burkholderia ambifaria MC40-6 chromosome 1, complete sequence
All Bacteria (B)	>NC_010552	1 Burkholderia ambifaria MC40-6 chromosome 2, complete sequence
All Bacteria (B)	>NC_010557	1 Burkholderia ambifaria MC40-6 chromosome 3, complete sequence
All Bacteria (B)	>NC_010553	1 Burkholderia ambifaria MC40-6 plasmid pBMC401, complete sequence
All Bacteria (B)	>NC_010725	1 Methylorubrum populi BJ001, complete sequence
All Bacteria (B)	>NC_010727	1 Methylorubrum populi BJ001 plasmid pMPOP01, complete sequence
All Bacteria (B)	>NC_010721	1 Methylorubrum populi BJ001 plasmid pMPOP02, complete sequence
All Bacteria (B)	>NC_010571	1 Opitutus terrae PB90-1, complete sequence
All Bacteria (B)	>NC_010582	1 Streptococcus pneumoniae CGSP14, complete genome
All Bacteria (B)	>NC_010718	1 Natranaerobius thermophilus JW/NM-WN-LF, complete sequence
All Bacteria (B)	>NC_010715	1 Natranaerobius thermophilus JW/NM-WN-LF plasmid pNTHE01, complete sequence
All Bacteria (B)	>NC_010724	1 Natranaerobius thermophilus JW/NM-WN-LF plasmid pNTHE02, complete sequence
All Bacteria (B)	>NC_010628	1 Nostoc punctiforme PCC 73102, complete sequence
All Bacteria (B)	>NC_010631	1 Nostoc punctiforme PCC 73102 plasmid pNPUN01, complete sequence
All Bacteria (B)	>NC_010632	1 Nostoc punctiforme PCC 73102 plasmid pNPUN02, complete sequence
All Bacteria (B)	>NC_010630	1 Nostoc punctiforme PCC 73102 plasmid pNPUN03, complete sequence
All Bacteria (B)	>NC_010633	1 Nostoc punctiforme PCC 73102 plasmid pNPUN04, complete sequence
All Bacteria (B)	>NC_010629	1 Nostoc punctiforme PCC 73102 plasmid pNPUN05, complete sequence
All Bacteria (B)	>NC_010622	1 Paraburkholderia phymatum STM815 chromosome 1, complete sequence
All Bacteria (B)	>NC_010623	1 Paraburkholderia phymatum STM815 chromosome 2, complete sequence
All Bacteria (B)	>NC_010625	1 Paraburkholderia phymatum STM815 plasmid pBPHY01, complete sequence
All Bacteria (B)	>NC_010627	1 Paraburkholderia phymatum STM815 plasmid pBPHY02, complete sequence
All Bacteria (B)	>NC_011025	1 Mycoplasma arthritidis 158L3-1, complete genome
All Bacteria (B)	>NC_010634	1 Yersinia pseudotuberculosis PB1/+, complete genome
All Bacteria (B)	>NC_010635	1 Yersinia pseudotuberculosis PB1/+ plasmid pYPTS01, complete sequence
All Bacteria (B)	>NC_011035	1 Neisseria gonorrhoeae NCCP11945, complete genome
All Bacteria (B)	>NC_011034	1 Neisseria gonorrhoeae NCCP11945 plasmid pNGK, complete sequence
All Bacteria (B)	>NC_010681	1 Paraburkholderia phytofirmans PsJN chromosome 1, complete sequence
All Bacteria (B)	>NC_010676	1 Paraburkholderia phytofirmans PsJN chromosome 2, complete sequence
All Bacteria (B)	>NC_010679	1 Paraburkholderia phytofirmans PsJN plasmid pBPHYT01, complete sequence
All Bacteria (B)	>NC_010644	1 Elusimicrobium minutum Pei191, complete genome
All Bacteria (B)	>NC_010674	1 Clostridium botulinum B str	Eklund 17B (NRP), complete sequence
All Bacteria (B)	>NC_010680	1 Clostridium botulinum B str	Eklund 17B (NRP) plasmid pCLL, complete sequence
All Bacteria (B)	>NC_010658	1 Shigella boydii CDC 3083-94, complete genome
All Bacteria (B)	>NC_010656	1 Shigella boydii CDC 3083-94 plasmid pBS512_2, complete sequence
All Bacteria (B)	>NC_010660	1 Shigella boydii CDC 3083-94 plasmid pBS512_211, complete sequence
All Bacteria (B)	>NC_010657	1 Shigella boydii CDC 3083-94 plasmid pBS512_33, complete sequence
All Bacteria (B)	>NC_010659	1 Shigella boydii CDC 3083-94 plasmid pBS512_5, complete sequence
All Bacteria (B)	>NC_010672	1 Shigella boydii CDC 3083-94 plasmid pBS512_7, complete sequence
All Bacteria (B)	>NC_010682	1 Ralstonia pickettii 12J chromosome 1, complete sequence
All Bacteria (B)	>NC_010678	1 Ralstonia pickettii 12J chromosome 2, complete sequence
All Bacteria (B)	>NC_010683	1 Ralstonia pickettii 12J plasmid pRPIC01, complete sequence
All Bacteria (B)	>NC_010655	1 Akkermansia muciniphila ATCC BAA-835, complete genome
All Bacteria (B)	>NC_010698	2 Helicobacter pylori Shi470, complete genome
All Bacteria (B)	>NC_010994	1 Rhizobium etli CIAT 652, complete genome
All Bacteria (B)	>NC_010998	1 Rhizobium etli CIAT 652 plasmid pA, complete sequence
All Bacteria (B)	>NC_010996	1 Rhizobium etli CIAT 652 plasmid pB, complete sequence
All Bacteria (B)	>NC_010997	1 Rhizobium etli CIAT 652 plasmid pC, complete sequence
All Bacteria (B)	>NC_010723	1 Clostridium botulinum E3 str	Alaska E43, complete genome
All Bacteria (B)	>NC_012026	1 Anaplasma marginale str	Florida, complete genome
All Bacteria (B)	>NC_010730	1 Sulfurihydrogenibium sp	YO3AOP1, complete genome
All Bacteria (B)	>NC_012658	1 Clostridium botulinum Ba4 str	657, complete genome
All Bacteria (B)	>NC_012654	1 Clostridium botulinum Ba4 str	657 plasmid pCLJ, complete sequence
All Bacteria (B)	>NC_012657	1 Clostridium botulinum Ba4 str	657 plasmid pCLJ2, complete sequence
All Bacteria (B)	>NC_012108	1 Desulfobacterium autotrophicum HRM2, complete genome
All Bacteria (B)	>NC_012109	1 Desulfobacterium autotrophicum HRM2 plasmid pHRM2a, complete sequence
All Bacteria (B)	>NC_010814	1 Geobacter lovleyi SZ, complete genome
All Bacteria (B)	>NC_010815	1 Geobacter lovleyi SZ plasmid pGLOV01, complete sequence
All Bacteria (B)	>NC_010939	1 Actinobacillus pleuropneumoniae serovar 7 str	AP76, complete genome
All Bacteria (B)	>NC_010941	1 Actinobacillus pleuropneumoniae serovar 7 str	AP76 plasmid ABB7_B, complete sequence
All Bacteria (B)	>NC_010942	1 Actinobacillus pleuropneumoniae serovar 7 str	AP76 plasmid APP7_A, complete sequence
All Bacteria (B)	>NC_010940	1 Actinobacillus pleuropneumoniae serovar 7 str	AP76 plasmid APP7_C, complete sequence
All Bacteria (B)	>NC_011593	1 Bifidobacterium longum subsp	infantis ATCC 15697 = JCM 1222 = DSM 20088, complete sequence
All Bacteria (B)	>NC_011004	1 Rhodopseudomonas palustris TIE-1, complete sequence
All Bacteria (B)	>NC_010803	1 Chlorobium limicola DSM 245, complete sequence
All Bacteria (B)	>NC_011899	1 Halothermothrix orenii H 168, complete genome
All Bacteria (B)	>NC_011027	1 Chlorobaculum parvum NCIB 8327, complete genome
All Bacteria (B)	>NC_011026	1 Chloroherpeton thalassium ATCC 35110, complete genome
All Bacteria (B)	>NC_010831	1 Chlorobium phaeobacteroides BS1, complete genome
All Bacteria (B)	>NC_010830	1 Candidatus Amoebophilus asiaticus 5a2, complete genome
All Bacteria (B)	>NC_011138	3 Alteromonas mediterranea DE, complete sequence
All Bacteria (B)	>NC_012781	1 [Eubacterium] rectale ATCC 33656, complete sequence
All Bacteria (B)	>NC_011059	1 Prosthecochloris aestuarii DSM 271, complete sequence
All Bacteria (B)	>NC_011061	1 Prosthecochloris aestuarii DSM 271 plasmid pPAES01, complete sequence
All Bacteria (B)	>NC_011060	1 Pelodictyon phaeoclathratiforme BU-1, complete sequence
All Bacteria (B)	>NC_011071	1 Stenotrophomonas maltophilia R551-3, complete genome
All Bacteria (B)	>NC_012526	1 Deinococcus deserti VCD115, complete genome
All Bacteria (B)	>NC_012527	1 Deinococcus deserti VCD115 plasmid 1, complete sequence
All Bacteria (B)	>NC_012529	1 Deinococcus deserti VCD115 plasmid 2, complete sequence
All Bacteria (B)	>NC_012528	1 Deinococcus deserti VCD115 plasmid 3, complete sequence
All Bacteria (B)	>NC_011083	1 Salmonella enterica subsp	enterica serovar Heidelberg str	SL476, complete genome
All Bacteria (B)	>NC_011082	1 Salmonella enterica subsp	enterica serovar Heidelberg str	SL476 plasmid pSL476_3, complete sequence
All Bacteria (B)	>NC_011081	1 Salmonella enterica subsp	enterica serovar Heidelberg str	SL476 plasmid pSL476_91, complete sequence
All Bacteria (B)	>NC_011146	1 Geobacter bemidjiensis Bem, complete genome
All Bacteria (B)	>NC_011094	1 Salmonella enterica subsp	enterica serovar Schwarzengrund str	CVM19633, complete genome
All Bacteria (B)	>NC_011092	1 Salmonella enterica subsp	enterica serovar Schwarzengrund str	CVM19633 plasmid pCVM19633_110, complete sequence
All Bacteria (B)	>NC_011093	1 Salmonella enterica subsp	enterica serovar Schwarzengrund str	CVM19633 plasmid pCVM19633_4, complete sequence
All Bacteria (B)	>NC_011134	1 Streptococcus equi subsp	zooepidemicus MGCS10565, complete genome
All Bacteria (B)	>NC_011126	1 Hydrogenobaculum sp	Y04AAS1, complete genome
All Bacteria (B)	>NC_011145	1 Anaeromyxobacter sp	K, complete genome
All Bacteria (B)	>NC_011206	1 Acidithiobacillus ferrooxidans ATCC 53993, complete genome
All Bacteria (B)	>NC_013508	1 Edwardsiella tarda EIB202, complete genome
All Bacteria (B)	>NC_013509	1 Edwardsiella tarda EIB202 plasmid pEIB202, complete sequence
All Bacteria (B)	>NC_011149	1 Salmonella enterica subsp	enterica serovar Agona str	SL483, complete genome
All Bacteria (B)	>NC_011148	1 Salmonella enterica subsp	enterica serovar Agona str	SL483 plasmid, complete sequence
All Bacteria (B)	>NC_011205	1 Salmonella enterica subsp	enterica serovar Dublin str	CT_02021853, complete genome
All Bacteria (B)	>NC_011204	1 Salmonella enterica subsp	enterica serovar Dublin str	CT_02021853 plasmid pCT02021853_74, complete sequence
All Bacteria (B)	>NC_011295	1 Coprothermobacter proteolyticus DSM 5265, complete sequence
All Bacteria (B)	>NC_011297	1 Dictyoglomus thermophilum H-6-12, complete sequence
All Bacteria (B)	>NC_011296	1 Thermodesulfovibrio yellowstonii DSM 11347 chromosome, complete genome
All Bacteria (B)	>NC_011963	1 Rhodobacter sphaeroides KD131 chromosome 1, complete sequence
All Bacteria (B)	>NC_011958	1 Rhodobacter sphaeroides KD131 chromosome 2, complete sequence
All Bacteria (B)	>NC_011962	1 Rhodobacter sphaeroides KD131 plasmid pRSKD131A, complete sequence
All Bacteria (B)	>NC_011960	1 Rhodobacter sphaeroides KD131 plasmid pRSKD131B, complete sequence
All Bacteria (B)	>NC_012559	1 Laribacter hongkongensis HLHK9, complete sequence
All Bacteria (B)	>NC_012560	1 Azotobacter vinelandii DJ, complete genome
All Bacteria (B)	>NC_011834	1 Buchnera aphidicola str	Tuc7 (Acyrthosiphon pisum), complete genome
All Bacteria (B)	>NC_011833	1 Buchnera aphidicola str	5A (Acyrthosiphon pisum), complete genome
All Bacteria (B)	>NC_011353	1 Escherichia coli O157:H7 str	EC4115, complete sequence
All Bacteria (B)	>NC_011351	1 Escherichia coli O157:H7 str	EC4115 plasmid pEC4115, complete sequence
All Bacteria (B)	>NC_011350	1 Escherichia coli O157:H7 str	EC4115 plasmid pO157, complete sequence
All Bacteria (B)	>NC_011333	1 Helicobacter pylori G27, complete genome
All Bacteria (B)	>NC_011334	1 Helicobacter pylori G27 plasmid pHPG27, complete sequence
All Bacteria (B)	>NC_011660	1 Listeria monocytogenes HCC23, complete sequence
All Bacteria (B)	>NC_011725	1 Bacillus cereus B4264, complete genome
All Bacteria (B)	>NC_011658	1 Bacillus cereus AH187, complete genome
All Bacteria (B)	>NC_011654	1 Bacillus cereus AH187 plasmid pAH187_12, complete sequence
All Bacteria (B)	>NC_011655	1 Bacillus cereus AH187 plasmid pAH187_270, complete sequence
All Bacteria (B)	>NC_011657	1 Bacillus cereus AH187 plasmid pAH187_3, complete sequence
All Bacteria (B)	>NC_011656	1 Bacillus cereus AH187 plasmid pAH187_45, complete sequence
All Bacteria (B)	>NC_011586	2 Acinetobacter baumannii AB0057, complete genome
All Bacteria (B)	>NC_011585	2 Acinetobacter baumannii AB0057 plasmid pAB0057, complete sequence
All Bacteria (B)	>NC_011374	1 Ureaplasma urealyticum serovar 10 str	ATCC 33699, complete genome
All Bacteria (B)	>NC_011653	1 Thermosipho africanus TCF52B, complete sequence
All Bacteria (B)	>NC_011772	1 Bacillus cereus G9842, complete genome
All Bacteria (B)	>NC_011774	1 Bacillus cereus G9842 plasmid pG9842_140, complete sequence
All Bacteria (B)	>NC_011775	1 Bacillus cereus G9842 plasmid pG9842_209, complete sequence
All Bacteria (B)	>NC_011365	1 Gluconacetobacter diazotrophicus PA1 5, complete sequence
All Bacteria (B)	>NC_011367	1 Gluconacetobacter diazotrophicus PA1 5 plasmid pGDIA01, complete sequence
All Bacteria (B)	>NC_011369	1 Rhizobium leguminosarum bv	trifolii WSM2304, complete sequence
All Bacteria (B)	>NC_011368	1 Rhizobium leguminosarum bv	trifolii WSM2304 plasmid pRLG201, complete sequence
All Bacteria (B)	>NC_011366	1 Rhizobium leguminosarum bv	trifolii WSM2304 plasmid pRLG202, complete sequence
All Bacteria (B)	>NC_011370	1 Rhizobium leguminosarum bv	trifolii WSM2304 plasmid pRLG203, complete sequence
All Bacteria (B)	>NC_011371	1 Rhizobium leguminosarum bv	trifolii WSM2304 plasmid pRLG204, complete sequence
All Bacteria (B)	>NC_011386	1 Oligotropha carboxidovorans OM5 strain OM5, complete genome
All Bacteria (B)	>NC_011769	1 Desulfovibrio vulgaris str	'Miyazaki F', complete genome
All Bacteria (B)	>NC_011728	1 Borreliella burgdorferi ZS7, complete sequence
All Bacteria (B)	>NC_011724	1 Borreliella burgdorferi ZS7 plasmid ZS7_cp26, complete sequence
All Bacteria (B)	>NC_011731	1 Borreliella burgdorferi ZS7 plasmid ZS7_cp32-1, complete sequence
All Bacteria (B)	>NC_011735	1 Borreliella burgdorferi ZS7 plasmid ZS7_cp32-12, complete sequence
All Bacteria (B)	>NC_011720	1 Borreliella burgdorferi ZS7 plasmid ZS7_cp32-3+10, complete sequence
All Bacteria (B)	>NC_011736	1 Borreliella burgdorferi ZS7 plasmid ZS7_cp32-4, complete sequence
All Bacteria (B)	>NC_011722	1 Borreliella burgdorferi ZS7 plasmid ZS7_cp32-9, complete sequence
All Bacteria (B)	>NC_011782	1 Borreliella burgdorferi ZS7 plasmid ZS7_lp17, complete sequence
All Bacteria (B)	>NC_011783	1 Borreliella burgdorferi ZS7 plasmid ZS7_lp25, complete sequence
All Bacteria (B)	>NC_011780	1 Borreliella burgdorferi ZS7 plasmid ZS7_lp28-1, complete sequence
All Bacteria (B)	>NC_011779	1 Borreliella burgdorferi ZS7 plasmid ZS7_lp28-2, complete sequence
All Bacteria (B)	>NC_011781	1 Borreliella burgdorferi ZS7 plasmid ZS7_lp28-3, complete sequence
All Bacteria (B)	>NC_011785	1 Borreliella burgdorferi ZS7 plasmid ZS7_lp28-4, complete sequence
All Bacteria (B)	>NC_011778	1 Borreliella burgdorferi ZS7 plasmid ZS7_lp36, complete sequence
All Bacteria (B)	>NC_011784	1 Borreliella burgdorferi ZS7 plasmid ZS7_lp54, complete sequence
All Bacteria (B)	>NC_011835	1 Bifidobacterium animalis subsp	lactis AD011, complete sequence
All Bacteria (B)	>NC_012581	1 Bacillus anthracis str	CDC 684, complete genome
All Bacteria (B)	>NC_012579	1 Bacillus anthracis str	CDC 684 plasmid pX01, complete sequence
All Bacteria (B)	>NC_012577	1 Bacillus anthracis str	CDC 684 plasmid pX02, complete sequence
All Bacteria (B)	>NC_011498	1 Helicobacter pylori P12, complete genome
All Bacteria (B)	>NC_011499	1 Helicobacter pylori P12 plasmid HPP12, complete sequence
All Bacteria (B)	>NC_011761	1 Acidithiobacillus ferrooxidans ATCC 23270, complete sequence
All Bacteria (B)	>NC_012730	1 Rickettsia peacockii str	Rustic, complete genome
All Bacteria (B)	>NC_012732	1 Rickettsia peacockii str	Rustic plasmid pRPR, complete sequence
All Bacteria (B)	>NC_012438	1 Sulfurihydrogenibium azorense Az-Fu1, complete genome
All Bacteria (B)	>NC_012440	1 Persephonella marina EX-H1, complete genome
All Bacteria (B)	>NC_012439	1 Persephonella marina EX-H1 plasmid, complete sequence
All Bacteria (B)	>NC_012578	1 Vibrio cholerae M66-2 chromosome I, complete sequence
All Bacteria (B)	>NC_012580	1 Vibrio cholerae M66-2 chromosome II, complete sequence
All Bacteria (B)	>NC_012582	1 Vibrio cholerae O395 chromosome I, complete sequence
All Bacteria (B)	>NC_012583	1 Vibrio cholerae O395 chromosome II, complete sequence
All Bacteria (B)	>NC_011661	1 Dictyoglomus turgidum DSM 6724 chromosome, complete genome
All Bacteria (B)	>NC_011663	1 Shewanella baltica OS223, complete sequence
All Bacteria (B)	>NC_011664	1 Shewanella baltica OS223 plasmid pS22301, complete sequence
All Bacteria (B)	>NC_011668	1 Shewanella baltica OS223 plasmid pS22302, complete sequence
All Bacteria (B)	>NC_011665	1 Shewanella baltica OS223 plasmid pS22303, complete sequence
All Bacteria (B)	>NC_011959	1 Thermomicrobium roseum DSM 5159, complete genome
All Bacteria (B)	>NC_011961	1 Thermomicrobium roseum DSM 5159 plasmid, complete sequence
All Bacteria (B)	>NC_012115	1 Nautilia profundicola AmH, complete genome
All Bacteria (B)	>NC_011666	1 Methylocella silvestris BL2, complete genome
All Bacteria (B)	>NC_011662	2 Thauera sp	MZ1T, complete genome
All Bacteria (B)	>NC_011667	1 Thauera sp	MZ1T plasmid pTha01, complete sequence
All Bacteria (B)	>NC_011773	1 Bacillus cereus AH820, complete genome
All Bacteria (B)	>NC_011771	1 Bacillus cereus AH820 plasmid pAH820_10, complete sequence
All Bacteria (B)	>NC_011777	1 Bacillus cereus AH820 plasmid pAH820_272, complete sequence
All Bacteria (B)	>NC_011776	1 Bacillus cereus AH820 plasmid pAH820_3, complete sequence
All Bacteria (B)	>NC_011726	1 Rippkaea orientalis PCC 8801, complete sequence
All Bacteria (B)	>NC_011721	1 Rippkaea orientalis PCC 8801 plasmid pP880101, complete sequence
All Bacteria (B)	>NC_011723	1 Rippkaea orientalis PCC 8801 plasmid pP880102, complete sequence
All Bacteria (B)	>NC_011727	1 Rippkaea orientalis PCC 8801 plasmid pP880103, complete sequence
All Bacteria (B)	>NC_011729	1 Gloeothece citriformis PCC 7424, complete sequence
All Bacteria (B)	>NC_011738	1 Gloeothece citriformis PCC 7424 plasmid pP742401, complete sequence
All Bacteria (B)	>NC_011737	1 Gloeothece citriformis PCC 7424 plasmid pP742402, complete sequence
All Bacteria (B)	>NC_011730	1 Gloeothece citriformis PCC 7424 plasmid pP742403, complete sequence
All Bacteria (B)	>NC_011732	1 Gloeothece citriformis PCC 7424 plasmid pP742404, complete sequence
All Bacteria (B)	>NC_011733	1 Gloeothece citriformis PCC 7424 plasmid pP742405, complete sequence
All Bacteria (B)	>NC_011734	1 Gloeothece citriformis PCC 7424 plasmid pP742406, complete sequence
All Bacteria (B)	>NC_011757	1 Methylorubrum extorquens CM4, complete sequence
All Bacteria (B)	>NC_011758	1 Methylorubrum extorquens CM4 plasmid pCMU01, complete sequence
All Bacteria (B)	>NC_011760	1 Methylorubrum extorquens CM4 plasmid pCMU02, complete sequence
All Bacteria (B)	>NC_014034	1 Rhodobacter capsulatus SB 1003, complete genome
All Bacteria (B)	>NC_014035	1 Rhodobacter capsulatus SB 1003 plasmid pRCB133, complete sequence
All Bacteria (B)	>NC_011852	1 Glaesserella parasuis SH0165, complete sequence
All Bacteria (B)	>NC_011768	1 Desulfatibacillum aliphaticivorans strain AK-01, complete genome
All Bacteria (B)	>NC_011830	1 Desulfitobacterium hafniense DCB-2, complete sequence
All Bacteria (B)	>NC_011831	1 Chloroflexus aggregans DSM 9485, complete genome
All Bacteria (B)	>NC_011901	1 Thioalkalivibrio sulfidiphilus HL-EbGr7, complete sequence
All Bacteria (B)	>NC_011916	1 Caulobacter crescentus NA1000, complete genome
All Bacteria (B)	>NC_011886	1 Pseudarthrobacter chlorophenolicus A6, complete sequence
All Bacteria (B)	>NC_011879	1 Pseudarthrobacter chlorophenolicus A6 plasmid pACHL01, complete sequence
All Bacteria (B)	>NC_011881	1 Pseudarthrobacter chlorophenolicus A6 plasmid pACHL02, complete sequence
All Bacteria (B)	>NC_011884	1 Cyanothece sp	PCC 7425, complete genome
All Bacteria (B)	>NC_011880	1 Cyanothece sp	PCC 7425 plasmid pP742501, complete sequence
All Bacteria (B)	>NC_011885	1 Cyanothece sp	PCC 7425 plasmid pP742502, complete sequence
All Bacteria (B)	>NC_011882	1 Cyanothece sp	PCC 7425 plasmid pP742503, complete sequence
All Bacteria (B)	>NC_011898	1 Ruminiclostridium cellulolyticum H10, complete sequence
All Bacteria (B)	>NC_011894	1 Methylobacterium nodulans ORS 2060, complete genome
All Bacteria (B)	>NC_011892	1 Methylobacterium nodulans ORS 2060 plasmid pMNOD01, complete sequence
All Bacteria (B)	>NC_011887	1 Methylobacterium nodulans ORS 2060 plasmid pMNOD02, complete sequence
All Bacteria (B)	>NC_011893	1 Methylobacterium nodulans ORS 2060 plasmid pMNOD03, complete sequence
All Bacteria (B)	>NC_011895	1 Methylobacterium nodulans ORS 2060 plasmid pMNOD04, complete sequence
All Bacteria (B)	>NC_011888	1 Methylobacterium nodulans ORS 2060 plasmid pMNOD05, complete sequence
All Bacteria (B)	>NC_011889	1 Methylobacterium nodulans ORS 2060 plasmid pMNOD06, complete sequence
All Bacteria (B)	>NC_011890	1 Methylobacterium nodulans ORS 2060 plasmid pMNOD07, complete sequence
All Bacteria (B)	>NC_012225	1 Brachyspira hyodysenteriae WA1, complete genome
All Bacteria (B)	>NC_012226	1 Brachyspira hyodysenteriae WA1 plasmid pBHWA1, complete sequence
All Bacteria (B)	>NC_011883	1 Desulfovibrio desulfuricans ATCC 27774, complete sequence
All Bacteria (B)	>NC_011891	1 Anaeromyxobacter dehalogenans 2CP-1, complete sequence
All Bacteria (B)	>NC_016856	1 Salmonella enterica subsp	enterica serovar Typhimurium str	14028S, complete sequence
All Bacteria (B)	>NC_016855	1 Salmonella enterica subsp	enterica serovar Typhimurium str	14028S plasmid unnamed, complete sequence
All Bacteria (B)	>NC_012032	1 Chloroflexus aurantiacus Y-400-fl, complete sequence
All Bacteria (B)	>NC_013008	1 Escherichia coli O157:H7 str	TW14359, complete genome
All Bacteria (B)	>NC_013010	1 Escherichia coli O157:H7 str	TW14359 plasmid pO157, complete sequence
All Bacteria (B)	>NC_017328	1 Shigella flexneri 2002017, complete sequence
All Bacteria (B)	>NC_017319	1 Shigella flexneri 2002017 plasmid pSFxv_1, complete sequence
All Bacteria (B)	>NC_017320	1 Shigella flexneri 2002017 plasmid pSFxv_2, complete sequence
All Bacteria (B)	>NC_017329	1 Shigella flexneri 2002017 plasmid pSFxv_3, complete sequence
All Bacteria (B)	>NC_017321	1 Shigella flexneri 2002017 plasmid pSFxv_4, complete sequence
All Bacteria (B)	>NC_017330	1 Shigella flexneri 2002017 plasmid pSFxv_5, complete sequence
All Bacteria (B)	>NC_011979	1 Geobacter daltonii FRC-32, complete genome
All Bacteria (B)	>NC_012416	1 Wolbachia sp	wRi, complete genome
All Bacteria (B)	>NC_011992	1 Acidovorax ebreus TPSY, complete genome
All Bacteria (B)	>NC_012034	1 Caldicellulosiruptor bescii DSM 6725, complete genome
All Bacteria (B)	>NC_012036	1 Caldicellulosiruptor bescii DSM 6725 plasmid pATHE01, complete sequence
All Bacteria (B)	>NC_012037	1 Caldicellulosiruptor bescii DSM 6725 plasmid pATHE02, complete sequence
All Bacteria (B)	>NC_012759	1 Escherichia coli BW2952, complete genome
All Bacteria (B)	>NC_012472	1 Bacillus cereus 03BB102, complete genome
All Bacteria (B)	>NC_012473	1 Bacillus cereus 03BB102 plasmid p03BB102_179, complete sequence
All Bacteria (B)	>NC_013009	1 Neorickettsia risticii str	Illinois, complete genome
All Bacteria (B)	>NC_012483	1 Acidobacterium capsulatum ATCC 51196, complete genome
All Bacteria (B)	>NC_012668	1 Vibrio cholerae MJ-1236 chromosome 1, complete sequence
All Bacteria (B)	>NC_012667	1 Vibrio cholerae MJ-1236 chromosome 2, complete sequence
All Bacteria (B)	>NC_013454	1 Blattabacterium sp	(Blattella germanica) str	Bge, complete genome
All Bacteria (B)	>NC_015679	1 Blattabacterium sp	(Blattella germanica) str	Bge plasmid pBge, complete sequence
All Bacteria (B)	>NC_012441	1 Brucella melitensis ATCC 23457 chromosome I, complete sequence
All Bacteria (B)	>NC_012442	1 Brucella melitensis ATCC 23457 chromosome II, complete sequence
All Bacteria (B)	>NC_012724	2 Burkholderia glumae BGR1 chromosome 1, complete sequence
All Bacteria (B)	>NC_012721	2 Burkholderia glumae BGR1 chromosome 2, complete sequence
All Bacteria (B)	>NC_012723	1 Burkholderia glumae BGR1 plasmid bglu_1p, complete sequence
All Bacteria (B)	>NC_012718	1 Burkholderia glumae BGR1 plasmid bglu_2p, complete sequence
All Bacteria (B)	>NC_012720	2 Burkholderia glumae BGR1 plasmid bglu_3p, complete sequence
All Bacteria (B)	>NC_012725	2 Burkholderia glumae BGR1 plasmid bglu_4p, complete sequence
All Bacteria (B)	>NC_012971	2 Escherichia coli BL21(DE3), complete sequence
All Bacteria (B)	>NC_012808	1 Methylorubrum extorquens AM1, complete sequence
All Bacteria (B)	>NC_012811	1 Methylorubrum extorquens AM1 megaplasmid, complete sequence
All Bacteria (B)	>NC_012807	1 Methylorubrum extorquens AM1 plasmid p1META1, complete sequence
All Bacteria (B)	>NC_012809	1 Methylorubrum extorquens AM1 plasmid p2META1, complete sequence
All Bacteria (B)	>NC_012810	1 Methylorubrum extorquens AM1 plasmid p3META1, complete sequence
All Bacteria (B)	>NC_012814	1 Bifidobacterium animalis subsp	lactis Bl-04, complete genome
All Bacteria (B)	>NC_012846	1 Bartonella grahamii as4aup, complete genome
All Bacteria (B)	>NC_012847	1 Bartonella grahamii as4aup plasmid pBGR3, complete sequence
All Bacteria (B)	>NC_013119	1 Brucella microti CCM 4915 chromosome 1, complete sequence
All Bacteria (B)	>NC_013118	1 Brucella microti CCM 4915 chromosome 2, complete sequence
All Bacteria (B)	>NC_012563	1 Clostridium botulinum A2 str	Kyoto, complete genome
All Bacteria (B)	>NC_017560	1 Rickettsia prowazekii str	Rp22, complete sequence
All Bacteria (B)	>NC_017154	1 Yersinia pestis D106004, complete genome
All Bacteria (B)	>NC_017153	1 Yersinia pestis D106004 plasmid pCD1, complete sequence
All Bacteria (B)	>NC_017155	1 Yersinia pestis D106004 plasmid pMT1, complete sequence
All Bacteria (B)	>NC_017156	1 Yersinia pestis D106004 plasmid pPCY1, complete sequence
All Bacteria (B)	>NC_017160	1 Yersinia pestis D182038, complete genome
All Bacteria (B)	>NC_017157	1 Yersinia pestis D182038 plasmid pCD1, complete sequence
All Bacteria (B)	>NC_017158	1 Yersinia pestis D182038 plasmid pMT1, complete sequence
All Bacteria (B)	>NC_017159	1 Yersinia pestis D182038 plasmid pPCP1, complete sequence
All Bacteria (B)	>NC_014029	1 Yersinia pestis Z176003, complete genome
All Bacteria (B)	>NC_014017	1 Yersinia pestis Z176003 plasmid pCD1, complete sequence
All Bacteria (B)	>NC_014022	1 Yersinia pestis Z176003 plasmid pMT1, complete sequence
All Bacteria (B)	>NC_014027	1 Yersinia pestis Z176003 plasmid pPCP1, complete sequence
All Bacteria (B)	>NC_012659	1 Bacillus anthracis str	A0248, complete genome
All Bacteria (B)	>NC_012656	1 Bacillus anthracis str	A0248 plasmid pXO1, complete sequence
All Bacteria (B)	>NC_012655	1 Bacillus anthracis str	A0248 plasmid pXO2, complete sequence
All Bacteria (B)	>NC_012779	2 Edwardsiella ictaluri 93-146, complete sequence
All Bacteria (B)	>NC_012590	1 Corynebacterium aurimucosum ATCC 700975, complete sequence
All Bacteria (B)	>NC_010813	1 Corynebacterium aurimucosum ATCC 700975 plasmid pET44827, complete sequence
All Bacteria (B)	>NC_013768	1 Listeria monocytogenes 08-5923, complete genome
All Bacteria (B)	>NC_012913	1 Aggregatibacter aphrophilus NJ8700, complete genome
All Bacteria (B)	>NC_012633	1 Rickettsia africae ESF-5, complete sequence
All Bacteria (B)	>NC_012634	1 Rickettsia africae ESF-5 plasmid pRAF, complete sequence
All Bacteria (B)	>NC_012997	1 Teredinibacter turnerae T7901, complete genome
All Bacteria (B)	>NC_012673	1 Exiguobacterium sp	AT1b, complete sequence
All Bacteria (B)	>NC_012691	1 Tolumonas auensis DSM 9187, complete genome
All Bacteria (B)	>NC_012984	1 Lactobacillus plantarum JDM1, complete genome
All Bacteria (B)	>NC_012669	1 Beutenbergia cavernae DSM 12333, complete genome
All Bacteria (B)	>NC_013037	1 Dyadobacter fermentans DSM 18053, complete genome
All Bacteria (B)	>NC_012704	1 Corynebacterium kroppenstedtii DSM 44385, complete genome
All Bacteria (B)	>NZ_CP001621	1 Mycoplasma mycoides subsp	capri str	GM12 transgenic clone tetM-lacZ, complete genome
All Bacteria (B)	>NC_012850	1 Rhizobium leguminosarum bv	trifolii WSM1325, complete sequence
All Bacteria (B)	>NC_012848	1 Rhizobium leguminosarum bv	trifolii WSM1325 plasmid pR132501, complete sequence
All Bacteria (B)	>NC_012858	1 Rhizobium leguminosarum bv	trifolii WSM1325 plasmid pR132502, complete sequence
All Bacteria (B)	>NC_012853	1 Rhizobium leguminosarum bv	trifolii WSM1325 plasmid pR132503, complete sequence
All Bacteria (B)	>NC_012852	1 Rhizobium leguminosarum bv	trifolii WSM1325 plasmid pR132504, complete sequence
All Bacteria (B)	>NC_012854	1 Rhizobium leguminosarum bv	trifolii WSM1325 plasmid pR132505, complete sequence
All Bacteria (B)	>NC_012803	1 Micrococcus luteus NCTC 2665, complete genome
All Bacteria (B)	>NC_013173	1 Desulfomicrobium baculatum DSM 4028, complete genome
All Bacteria (B)	>NC_013093	1 Actinosynnema mirum DSM 43827, complete genome
All Bacteria (B)	>NC_013124	1 Acidimicrobium ferrooxidans DSM 10331, complete genome
All Bacteria (B)	>NC_013162	1 Capnocytophaga ochracea DSM 7271, complete genome
All Bacteria (B)	>NC_017453	1 Francisella tularensis subsp	tularensis NE061598, complete genome
All Bacteria (B)	>NC_012785	1 Kosmotoga olearia TBF 19	5	1, complete sequence
All Bacteria (B)	>NC_012791	1 Variovorax paradoxus S110 chromosome 1, complete sequence
All Bacteria (B)	>NC_012792	1 Variovorax paradoxus S110 chromosome 2, complete sequence
All Bacteria (B)	>NC_017625	1 Escherichia coli DH1, complete genome
All Bacteria (B)	>NC_012793	1 Geobacillus sp	WCH70, complete genome
All Bacteria (B)	>NC_012794	1 Geobacillus sp	WCH70 plasmid pWCH7001, complete sequence
All Bacteria (B)	>NC_012790	1 Geobacillus sp	WCH70 plasmid pWCH7002, complete sequence
All Bacteria (B)	>NC_013172	1 Brachybacterium faecium DSM 4810 chromosome, complete genome
All Bacteria (B)	>NC_012856	1 Ralstonia pickettii 12D chromosome 1, complete sequence
All Bacteria (B)	>NC_012857	1 Ralstonia pickettii 12D chromosome 2, complete sequence
All Bacteria (B)	>NC_012855	1 Ralstonia pickettii 12D plasmid pRp12D01, complete sequence
All Bacteria (B)	>NC_012849	1 Ralstonia pickettii 12D plasmid pRp12D02, complete sequence
All Bacteria (B)	>NC_012851	1 Ralstonia pickettii 12D plasmid pRp12D03, complete sequence
All Bacteria (B)	>NC_012881	1 Desulfovibrio salexigens DSM 2638, complete genome
All Bacteria (B)	>NC_014041	1 Zunongwangia profunda SM-A87, complete genome
All Bacteria (B)	>NC_012880	1 Dickeya paradisiaca Ech703, complete sequence
All Bacteria (B)	>NC_012912	1 Dickeya chrysanthemi Ech1591, complete sequence
All Bacteria (B)	>NC_012914	1 Paenibacillus sp	JDR-2, complete sequence
All Bacteria (B)	>NC_012917	1 Pectobacterium carotovorum subsp	carotovorum PC1, complete genome
All Bacteria (B)	>NC_012943	1 Mycobacterium tuberculosis KZN 1435, complete genome
All Bacteria (B)	>NC_012918	1 Geobacter sp	M21, complete genome
All Bacteria (B)	>NC_012947	1 Escherichia coli 'BL21-Gold(DE3)pLysS AG', complete genome
All Bacteria (B)	>NZ_CP001668	1 Mycoplasma mycoides subsp	capri str	GM12 chromosome clone deltatypeIIIres, complete genome
All Bacteria (B)	>NC_012968	1 Methylotenera mobilis JLW8, complete genome
All Bacteria (B)	>NC_013062	1 Flavobacteriaceae bacterium 3519-10, complete genome
All Bacteria (B)	>NC_012969	1 Methylovorus glucosetrophus SIP3-4, complete sequence
All Bacteria (B)	>NC_012970	1 Methylovorus glucosetrophus SIP3-4 plasmid pMsip01, complete sequence
All Bacteria (B)	>NC_012972	1 Methylovorus glucosetrophus SIP3-4 plasmid pMsip02, complete sequence
All Bacteria (B)	>NC_012985	3 Candidatus Liberibacter asiaticus str	psy62, complete sequence
All Bacteria (B)	>NC_012982	1 Hirschia baltica ATCC 49814, complete sequence
All Bacteria (B)	>NC_012983	1 Hirschia baltica ATCC 49814 plasmid pHbal01, complete sequence
All Bacteria (B)	>NC_017354	1 Helicobacter pylori 52, complete genome
All Bacteria (B)	>NC_013061	1 Pedobacter heparinus DSM 2366, complete genome
All Bacteria (B)	>NC_013170	1 Cryptobacterium curtum DSM 15641, complete genome
All Bacteria (B)	>NC_013159	1 Saccharomonospora viridis DSM 43017, complete genome
All Bacteria (B)	>NC_013165	1 Slackia heliotrinireducens DSM 20476, complete genome
All Bacteria (B)	>NC_013192	1 Leptotrichia buccalis C-1013-b, complete sequence
All Bacteria (B)	>NC_013169	1 Kytococcus sedentarius DSM 20547, complete genome
All Bacteria (B)	>NC_013132	1 Chitinophaga pinensis DSM 2588, complete genome
All Bacteria (B)	>NC_013131	1 Catenulispora acidiphila DSM 44928, complete sequence
All Bacteria (B)	>NC_013161	1 Rippkaea orientalis PCC 8802, complete sequence
All Bacteria (B)	>NC_013160	1 Rippkaea orientalis PCC 8802 plasmid pP880201, complete sequence
All Bacteria (B)	>NC_013163	1 Rippkaea orientalis PCC 8802 plasmid pP880202, complete sequence
All Bacteria (B)	>NC_013167	1 Rippkaea orientalis PCC 8802 plasmid pP880203, complete sequence
All Bacteria (B)	>NC_013168	1 Rippkaea orientalis PCC 8802 plasmid pP880204, complete sequence
All Bacteria (B)	>NC_013174	1 Jonesia denitrificans DSM 20603, complete genome
All Bacteria (B)	>NC_013166	1 Kangiella koreensis DSM 16069, complete genome
All Bacteria (B)	>NC_013171	1 Anaerococcus prevotii DSM 20548, complete genome
All Bacteria (B)	>NC_013164	1 Anaerococcus prevotii DSM 20548 plasmid pAPRE01, complete sequence
All Bacteria (B)	>NC_013222	1 Robiginitalea biformata HTCC2501, complete genome
All Bacteria (B)	>NC_017285	1 Chlamydia pneumoniae LPCoLN, complete sequence
All Bacteria (B)	>NC_017286	1 Chlamydia pneumoniae LPCoLN plasmid unnamed, complete sequence
All Bacteria (B)	>NC_013194	1 Candidatus Accumulibacter phosphatis clade IIA str	UW-1, complete genome
All Bacteria (B)	>NC_013193	1 Candidatus Accumulibacter phosphatis clade IIA str	UW-1 plasmid pAph01, complete sequence
All Bacteria (B)	>NC_013190	1 Candidatus Accumulibacter phosphatis clade IIA str	UW-1 plasmid pAph02, complete sequence
All Bacteria (B)	>NC_013191	1 Candidatus Accumulibacter phosphatis clade IIA str	UW-1 plasmid pAph03, complete sequence
All Bacteria (B)	>NC_013216	1 Desulfofarcimen acetoxidans DSM 771, complete sequence
All Bacteria (B)	>NC_013203	1 Atopobium parvulum DSM 20469, complete genome
All Bacteria (B)	>NC_013355	1 Zymomonas mobilis subsp	mobilis NCIMB 11163, complete sequence
All Bacteria (B)	>NC_013356	1 Zymomonas mobilis subsp	mobilis NCIMB 11163 plasmid pZA1001, complete sequence
All Bacteria (B)	>NC_013357	1 Zymomonas mobilis subsp	mobilis NCIMB 11163 plasmid pZA1002, complete sequence
All Bacteria (B)	>NC_013358	1 Zymomonas mobilis subsp	mobilis NCIMB 11163 plasmid pZA1003, complete sequence
All Bacteria (B)	>NC_013204	1 Eggerthella lenta DSM 2243, complete genome
All Bacteria (B)	>NC_013205	1 Alicyclobacillus acidocaldarius subsp	acidocaldarius DSM 446, complete genome
All Bacteria (B)	>NC_013206	1 Alicyclobacillus acidocaldarius subsp	acidocaldarius DSM 446 plasmid pAACI01, complete sequence
All Bacteria (B)	>NC_013207	1 Alicyclobacillus acidocaldarius subsp	acidocaldarius DSM 446 plasmid pAACI02, complete sequence
All Bacteria (B)	>NC_013208	1 Alicyclobacillus acidocaldarius subsp	acidocaldarius DSM 446 plasmid pAACI03, complete sequence
All Bacteria (B)	>NC_013223	1 Desulfohalobium retbaense DSM 5692, complete genome
All Bacteria (B)	>NC_013224	1 Desulfohalobium retbaense DSM 5692 plasmid pDRET01, complete sequence
All Bacteria (B)	>NC_013729	1 Kribbella flavida DSM 17836, complete sequence
All Bacteria (B)	>NC_013235	1 Nakamurella multipartita DSM 44233, complete sequence
All Bacteria (B)	>NC_013510	1 Thermomonospora curvata DSM 43183, complete genome
All Bacteria (B)	>NC_013517	1 Sebaldella termitidis ATCC 33386, complete genome
All Bacteria (B)	>NC_013518	1 Sebaldella termitidis ATCC 33386 plasmid pSTERM01, complete sequence
All Bacteria (B)	>NC_013519	1 Sebaldella termitidis ATCC 33386 plasmid pSTERM02, complete sequence
All Bacteria (B)	>NC_013946	1 Meiothermus ruber DSM 1279, complete sequence
All Bacteria (B)	>NC_013714	1 Bifidobacterium dentium Bd1, complete genome
All Bacteria (B)	>NC_014010	1 Candidatus Puniceispirillum marinum IMCC1322, complete sequence
All Bacteria (B)	>NC_013532	1 Anaplasma centrale str	Israel, complete genome
All Bacteria (B)	>NC_013947	1 Stackebrandtia nassauensis DSM 44728, complete genome
All Bacteria (B)	>NC_013515	1 Streptobacillus moniliformis DSM 12112, complete genome
All Bacteria (B)	>NC_013516	1 Streptobacillus moniliformis DSM 12112 plasmid pSMON01, complete sequence
All Bacteria (B)	>NC_013450	1 Staphylococcus aureus subsp	aureus ED98, complete sequence
All Bacteria (B)	>NC_013453	1 Staphylococcus aureus subsp	aureus ED98 plasmid pAVX, complete sequence
All Bacteria (B)	>NC_013451	1 Staphylococcus aureus subsp	aureus ED98 plasmid pAVY, complete sequence
All Bacteria (B)	>NC_013452	1 Staphylococcus aureus subsp	aureus ED98 plasmid pT181, complete sequence
All Bacteria (B)	>NC_013385	1 Ammonifex degensii KC4, complete genome
All Bacteria (B)	>NC_013386	1 Ammonifex degensii KC4 plasmid pADEG01, complete sequence
All Bacteria (B)	>NC_013421	1 Pectobacterium parmentieri WPP163, complete sequence
All Bacteria (B)	>NC_013410	1 Fibrobacter succinogenes subsp	succinogenes S85, complete genome
All Bacteria (B)	>NC_013406	1 Paenibacillus sp	Y412MC10, complete genome
All Bacteria (B)	>NC_013411	1 Geobacillus sp	Y412MC61, complete genome
All Bacteria (B)	>NC_013412	1 Geobacillus sp	Y412MC61, complete sequence
All Bacteria (B)	>NC_013960	1 Nitrosococcus halophilus Nc 4, complete sequence
All Bacteria (B)	>NC_013958	1 Nitrosococcus halophilus Nc 4 plasmid pNHAL01, complete sequence
All Bacteria (B)	>NC_013422	1 Halothiobacillus neapolitanus c2, complete genome
All Bacteria (B)	>NC_013441	1 Gordonia bronchialis DSM 43247, complete genome
All Bacteria (B)	>NC_013442	1 Gordonia bronchialis DSM 43247 plasmid pGBRO01, complete sequence
All Bacteria (B)	>NC_013440	1 Haliangium ochraceum DSM 14365, complete genome
All Bacteria (B)	>NC_013456	1 Vibrio antiquarius chromosome 1, complete sequence
All Bacteria (B)	>NC_013457	1 Vibrio antiquarius chromosome 2, complete sequence
All Bacteria (B)	>NC_013501	1 Rhodothermus marinus DSM 4252, complete genome
All Bacteria (B)	>NC_013502	1 Rhodothermus marinus DSM 4252 plasmid pRMAR01, complete sequence
All Bacteria (B)	>NC_013595	1 Streptosporangium roseum DSM 43021, complete genome
All Bacteria (B)	>NC_013596	1 Streptosporangium roseum DSM 43021 plasmid pSROS01, complete sequence
All Bacteria (B)	>NC_013512	1 Sulfurospirillum deleyianum DSM 6946, complete sequence
All Bacteria (B)	>NC_013522	1 Thermanaerovibrio acidaminovorans DSM 6589 chromosome, complete genome
All Bacteria (B)	>NC_013521	1 Sanguibacter keddieii DSM 10542, complete genome
All Bacteria (B)	>NC_013520	1 Veillonella parvula DSM 2008, complete genome
All Bacteria (B)	>NC_013530	1 Xylanimonas cellulosilytica DSM 15894, complete genome
All Bacteria (B)	>NC_013531	1 Xylanimonas cellulosilytica DSM 15894 plasmid pXCEL01, complete sequence
All Bacteria (B)	>NC_013523	1 Sphaerobacter thermophilus DSM 20745 chromosome 1, complete sequence
All Bacteria (B)	>NC_013524	1 Sphaerobacter thermophilus DSM 20745 chromosome 2, complete sequence
All Bacteria (B)	>NC_013525	1 Thermobaculum terrenum ATCC BAA-798 chromosome 1, complete sequence
All Bacteria (B)	>NC_013526	1 Thermobaculum terrenum ATCC BAA-798 chromosome 2, complete sequence
All Bacteria (B)	>NC_013552	1 Dehalococcoides mccartyi VS, complete sequence
All Bacteria (B)	>NC_013656	1 Lactococcus lactis subsp	lactis KF147, complete genome
All Bacteria (B)	>NC_013657	1 Lactococcus lactis subsp	lactis KF147 plasmid pKF147A, complete genome
All Bacteria (B)	>NC_013592	1 Dickeya zeae Ech586, complete sequence
All Bacteria (B)	>NC_013893	1 Staphylococcus lugdunensis HKU09-01, complete genome
All Bacteria (B)	>NC_013642	1 Thermotoga naphthophila RKU-10, complete genome
All Bacteria (B)	>NC_013771	1 Candidatus Atelocyanobacterium thalassa isolate ALOHA, complete genome
All Bacteria (B)	>NC_017340	1 Staphylococcus aureus 04-02981, complete genome
All Bacteria (B)	>NC_013941	1 Escherichia coli O55:H7 str	CB9615, complete genome
All Bacteria (B)	>NC_013942	1 Escherichia coli O55:H7 str	CB9615 plasmid pO55, complete sequence
All Bacteria (B)	>NC_013720	1 Pirellula staleyi DSM 6068, complete sequence
All Bacteria (B)	>NC_013721	1 Gardnerella vaginalis 409-05, complete genome
All Bacteria (B)	>NC_013895	2 Mageeibacillus indolicus UPII9-5, complete sequence
All Bacteria (B)	>NC_017214	1 Bifidobacterium animalis subsp	lactis BB-12, complete genome
All Bacteria (B)	>NC_013739	1 Conexibacter woesei DSM 14684, complete sequence
All Bacteria (B)	>NC_013740	1 Acidaminococcus fermentans DSM 20731, complete genome
All Bacteria (B)	>NC_013757	1 Geodermatophilus obscurus DSM 43160, complete genome
All Bacteria (B)	>NC_017502	1 Mycoplasma gallisepticum str	R(high), complete sequence
All Bacteria (B)	>NC_017503	1 Mycoplasma gallisepticum str	F, complete sequence
All Bacteria (B)	>NC_013956	2 Pantoea ananatis LMG 20103, complete genome
All Bacteria (B)	>NC_017279	1 Campylobacter jejuni subsp	jejuni IA3902, complete genome
All Bacteria (B)	>NC_017284	1 Campylobacter jejuni subsp	jejuni IA3902 plasmid pVir, complete sequence
All Bacteria (B)	>NC_013850	1 Klebsiella variicola At-22, complete genome
All Bacteria (B)	>NC_013851	1 Allochromatium vinosum DSM 180, complete sequence
All Bacteria (B)	>NC_013852	1 Allochromatium vinosum DSM 180 plasmid pALVIN01, complete sequence
All Bacteria (B)	>NC_013862	1 Allochromatium vinosum DSM 180 plasmid pALVIN02, complete sequence
All Bacteria (B)	>NC_013889	1 Thioalkalivibrio sp	K90mix, complete genome
All Bacteria (B)	>NC_013930	1 Thioalkalivibrio sp	K90mix plasmid pTK9001 sequence
All Bacteria (B)	>NC_014121	1 Enterobacter cloacae subsp	cloacae ATCC 13047 chromosome, complete genome
All Bacteria (B)	>NC_014107	1 Enterobacter cloacae subsp	cloacae ATCC 13047 plasmid pECL_A, complete sequence
All Bacteria (B)	>NC_014108	1 Enterobacter cloacae subsp	cloacae ATCC 13047 plasmid pECL_B, complete sequence
All Bacteria (B)	>NC_013890	1 Dehalococcoides mccartyi GT, complete sequence
All Bacteria (B)	>NC_013894	1 Thermocrinis albus DSM 14484, complete genome
All Bacteria (B)	>NC_013921	1 Thermoanaerobacter italicus Ab9, complete genome
All Bacteria (B)	>NC_013959	1 Sideroxydans lithotrophicus ES-1, complete sequence
All Bacteria (B)	>NC_013943	1 Denitrovibrio acetiphilus DSM 12809, complete sequence
All Bacteria (B)	>NC_017628	1 Escherichia coli IHE3034, complete genome
All Bacteria (B)	>NC_014039	1 Cutibacterium acnes SK137, complete sequence
All Bacteria (B)	>NC_014103	1 Bacillus megaterium DSM 319, complete sequence
All Bacteria (B)	>NC_014019	1 Bacillus megaterium QM B1551, complete genome
All Bacteria (B)	>NC_010008	2 Bacillus megaterium QM B1551 plasmid pBM100, complete sequence
All Bacteria (B)	>NC_010009	2 Bacillus megaterium QM B1551 plasmid pBM200, complete sequence
All Bacteria (B)	>NC_010010	2 Bacillus megaterium QM B1551 plasmid pBM300, complete sequence
All Bacteria (B)	>NC_004604	2 Bacillus megaterium QM B1551 plasmid pBM400, complete sequence
All Bacteria (B)	>NC_014025	1 Bacillus megaterium QM B1551 plasmid pBM500, complete sequence
All Bacteria (B)	>NC_014031	1 Bacillus megaterium QM B1551 plasmid pBM600, complete sequence
All Bacteria (B)	>NC_014023	1 Bacillus megaterium QM B1551 plasmid pBM700, complete sequence
All Bacteria (B)	>NC_014014	1 Mycoplasma crocodyli MP145, complete sequence
All Bacteria (B)	>NC_014011	1 Aminobacterium colombiense DSM 12261, complete genome
All Bacteria (B)	>NC_014008	1 Coraliomargarita akajimensis DSM 45221, complete genome
All Bacteria (B)	>NC_014033	1 Prevotella ruminicola 23, complete genome
All Bacteria (B)	>NC_006138	1 Desulfotalea psychrophila LSv54 chromosome
All Bacteria (B)	>NC_006139	1 Desulfotalea psychrophila LSv54, large plasmid
All Bacteria (B)	>NC_006140	1 Desulfotalea psychrophila LSv54 small plasmid
All Bacteria (B)	>NC_006513	1 Aromatoleum aromaticum EbN1, complete sequence
All Bacteria (B)	>NC_006823	1 Aromatoleum aromaticum EbN1 plasmid 1, complete sequence
All Bacteria (B)	>NC_006824	1 Aromatoleum aromaticum EbN1 plasmid 2, complete sequence
All Bacteria (B)	>NC_003228	3 Bacteroides fragilis NCTC 9343, complete genome
All Bacteria (B)	>NC_006873	1 Bacteroides fragilis NCTC 9343 pBF9343 plasmid complete sequence
All Bacteria (B)	>NC_005295	2 Ehrlichia ruminantium str	Welgevonden, complete sequence
All Bacteria (B)	>NC_004552	2 Chlamydia abortus S26/3, complete sequence
All Bacteria (B)	>NC_007576	1 Lactobacillus sakei subsp	sakei 23K, complete sequence
All Bacteria (B)	>NC_007481	1 Pseudoalteromonas haloplanktis TAC125 chromosome I, complete sequence
All Bacteria (B)	>NC_007482	1 Pseudoalteromonas haloplanktis TAC125 chromosome II, complete sequence
All Bacteria (B)	>NC_008027	1 Pseudomonas entomophila L48, complete sequence
All Bacteria (B)	>NC_009138	1 Herminiimonas arsenicoxydans chromosome, complete sequence
All Bacteria (B)	>NC_009445	1 Bradyrhizobium sp	ORS 278, complete sequence
All Bacteria (B)	>NC_010694	1 Erwinia tasmaniensis Et1/99, complete sequence
All Bacteria (B)	>NC_010695	1 Erwinia tasmaniensis Et1/99 plasmid pET09, complete sequence
All Bacteria (B)	>NC_010696	1 Erwinia tasmaniensis Et1/99 plasmid pET35, complete sequence
All Bacteria (B)	>NC_010699	1 Erwinia tasmaniensis Et1/99 plasmid pET45, complete sequence
All Bacteria (B)	>NC_010693	1 Erwinia tasmaniensis Et1/99 plasmid pET46, complete sequence
All Bacteria (B)	>NC_010697	1 Erwinia tasmaniensis Et1/99 plasmid pET49, complete sequence
All Bacteria (B)	>NC_011047	1 Candidatus Phytoplasma mali, complete sequence
All Bacteria (B)	>NC_011740	1 Escherichia fergusonii ATCC 35469 chromosome, complete genome
All Bacteria (B)	>NC_011743	1 Escherichia fergusonii ATCC 35469 plasmid pEFER, complete genome
All Bacteria (B)	>NC_011748	1 Escherichia coli 55989 chromosome, complete genome
All Bacteria (B)	>NC_011741	1 Escherichia coli IAI1 chromosome, complete genome
All Bacteria (B)	>NC_011742	1 Escherichia coli S88, complete sequence
All Bacteria (B)	>NC_011747	1 Escherichia coli S88 plasmid pECOS88, complete sequence
All Bacteria (B)	>NC_011750	1 Escherichia coli IAI39 chromosome, complete genome
All Bacteria (B)	>NC_010471	1 Leuconostoc citreum KM20, complete genome
All Bacteria (B)	>NC_010470	1 Leuconostoc citreum KM20 plasmid pLCK1, complete sequence
All Bacteria (B)	>NC_010466	1 Leuconostoc citreum KM20 plasmid pLCK2, complete sequence
All Bacteria (B)	>NC_010467	1 Leuconostoc citreum KM20 plasmid pLCK3, complete sequence
All Bacteria (B)	>NC_010469	1 Leuconostoc citreum KM20 plasmid pLCK4, complete sequence
All Bacteria (B)	>NC_020133	1 Mycobacterium liflandii 128FXT, complete sequence
All Bacteria (B)	>NC_011355	1 Mycobacterium liflandii 128FXT plasmid pMUM002, complete sequence
All Bacteria (B)	>NC_010999	1 Lactobacillus casei BL23, complete sequence
All Bacteria (B)	>NC_013198	1 Lactobacillus rhamnosus GG, complete sequence
All Bacteria (B)	>NC_013199	1 Lactobacillus rhamnosus Lc 705, complete sequence
All Bacteria (B)	>NC_013200	1 Lactobacillus rhamnosus Lc 705 plasmid pLC1, complete sequence
All Bacteria (B)	>NC_011601	1 Escherichia coli O127:H6 str	E2348/69, complete sequence
All Bacteria (B)	>NC_011602	1 Escherichia coli O127:H6 str	E2348/69 plasmid pE2348-2, complete sequence
All Bacteria (B)	>NC_011603	1 Escherichia coli O127:H6 str	E2348/69 plasmid pMAR2, complete sequence
All Bacteria (B)	>NC_011147	1 Salmonella enterica subsp	enterica serovar Paratyphi A str	AKU_12601, complete sequence
All Bacteria (B)	>NC_012471	1 Streptococcus equi subsp	equi 4047, complete genome
All Bacteria (B)	>NC_012470	1 Streptococcus equi subsp	zooepidemicus, complete sequence
All Bacteria (B)	>NC_011770	1 Pseudomonas aeruginosa LESB58, complete sequence
All Bacteria (B)	>NC_011900	1 Streptococcus pneumoniae ATCC 700669, complete sequence
All Bacteria (B)	>NC_011896	1 Mycobacterium leprae Br4923, complete genome sequence
All Bacteria (B)	>NC_012488	1 Listeria monocytogenes serotype 4b str	CLIP 80459, complete sequence
All Bacteria (B)	>NC_012924	1 Streptococcus suis SC84, complete sequence
All Bacteria (B)	>NC_012926	1 Streptococcus suis BM407 chromosome, complete genome
All Bacteria (B)	>NC_012923	1 Streptococcus suis BM407 plasmid pBM407, complete sequence
All Bacteria (B)	>NC_012687	1 Chlamydia trachomatis B/TZ1A828/OT, complete sequence
All Bacteria (B)	>NC_012686	1 Chlamydia trachomatis B/Jali20/OT, complete sequence
All Bacteria (B)	>NC_017501	1 Neisseria meningitidis 8013, complete sequence
All Bacteria (B)	>NC_016854	1 Salmonella enterica subsp	enterica serovar Typhimurium str	D23580, complete sequence
All Bacteria (B)	>NC_017331	1 Staphylococcus aureus subsp	aureus TW20, complete sequence
All Bacteria (B)	>NC_017352	1 Staphylococcus aureus subsp	aureus TW20 plasmid pTW20_1, complete sequence
All Bacteria (B)	>NC_017332	1 Staphylococcus aureus subsp	aureus TW20 plasmid pTW20_2, complete sequence
All Bacteria (B)	>NC_013282	2 Cronobacter turicensis z3032 complete genome
All Bacteria (B)	>NC_013283	1 Cronobacter turicensis z3032 plasmid pCTU1, complete sequence
All Bacteria (B)	>NC_013284	1 Cronobacter turicensis z3032 plasmid pCTU2, complete sequence
All Bacteria (B)	>NC_013285	1 Cronobacter turicensis z3032 plasmid pCTU3, complete sequence
All Bacteria (B)	>NC_013716	1 Citrobacter rodentium ICC168, complete sequence
All Bacteria (B)	>NC_013717	1 Citrobacter rodentium ICC168 plasmid pCROD1, complete sequence
All Bacteria (B)	>NC_013718	1 Citrobacter rodentium ICC168 plasmid pCROD2, complete sequence
All Bacteria (B)	>NC_013719	1 Citrobacter rodentium ICC168 plasmid pCROD3, complete sequence
All Bacteria (B)	>NC_017626	1 Escherichia coli 042, complete sequence
All Bacteria (B)	>NC_017627	1 Escherichia coli 042 plasmid pAA, complete sequence
All Bacteria (B)	>NC_013891	1 Listeria seeligeri serovar 1/2b str	SLCC3954, complete sequence
All Bacteria (B)	>NC_013853	1 Streptococcus mitis B6, complete genome
All Bacteria (B)	>NC_013798	1 Streptococcus gallolyticus UCN34, complete sequence
All Bacteria (B)	>NC_013971	1 Erwinia amylovora ATCC 49946, complete sequence
All Bacteria (B)	>NC_013972	1 Erwinia amylovora ATCC 49946 plasmid 1, complete sequence
All Bacteria (B)	>NC_013973	1 Erwinia amylovora ATCC 49946 plasmid 2, complete sequence
All Bacteria (B)	>NC_013892	1 Xenorhabdus bovienii SS-2004, complete sequence
All Bacteria (B)	>NC_012214	1 Erwinia pyrifoliae Ep1/96, complete sequence
All Bacteria (B)	>NC_013264	1 Erwinia pyrifoliae Ep1/96 plasmid pEP03, complete sequence
All Bacteria (B)	>NC_013265	1 Erwinia pyrifoliae Ep1/96 plasmid pEP05, complete sequence
All Bacteria (B)	>NC_013954	1 Erwinia pyrifoliae Ep1/96 plasmid pEP2	6, complete sequence
All Bacteria (B)	>NC_013263	1 Erwinia pyrifoliae Ep1/96 plasmid pEP36, complete sequence
All Bacteria (B)	>NC_000907	1 Haemophilus influenzae Rd KW20 chromosome, complete genome
All Bacteria (B)	>NC_000908	2 Mycoplasma genitalium G37, complete sequence
All Bacteria (B)	>NC_000912	1 Mycoplasma pneumoniae M129 chromosome, complete genome
All Bacteria (B)	>NC_004459	3 Vibrio vulnificus CMCP6 chromosome I, complete sequence
All Bacteria (B)	>NC_004460	2 Vibrio vulnificus CMCP6 chromosome II, complete sequence
All Bacteria (B)	>NC_005061	1 Blochmannia floridanus complete genome
All Bacteria (B)	>NC_005955	1 Bartonella quintana str	Toulouse, complete sequence
All Bacteria (B)	>NC_005956	1 Bartonella henselae str	Houston-1, complete sequence
All Bacteria (B)	>NC_005966	1 Acinetobacter baylyi ADP1, complete sequence
All Bacteria (B)	>NC_006155	1 Yersinia pseudotuberculosis IP 32953, complete sequence
All Bacteria (B)	>NC_006153	2 Yersinia pseudotuberculosis IP 32953 plasmid pYV, complete sequence
All Bacteria (B)	>NC_006154	1 Yersinia pseudotuberculosis IP 32953 plasmid pYptb32953, complete sequence
All Bacteria (B)	>NC_006368	1 Legionella pneumophila str	Paris, complete sequence
All Bacteria (B)	>NC_006365	1 Legionella pneumophila str	Paris plasmid pLPP, complete sequence
All Bacteria (B)	>NC_006369	1 Legionella pneumophila str	Lens, complete sequence
All Bacteria (B)	>NC_006366	1 Legionella pneumophila str	Lens plasmid pLPL, complete sequence
All Bacteria (B)	>NC_006831	1 Ehrlichia ruminantium str	Gardel, complete sequence
All Bacteria (B)	>NC_006832	1 Ehrlichia ruminantium str	Welgevonden, complete sequence
All Bacteria (B)	>NC_007618	1 Brucella abortus 2308 chromosome I, complete sequence
All Bacteria (B)	>NC_007624	1 Brucella abortus 2308 chromosome II, complete sequence
All Bacteria (B)	>NC_007963	1 Chromohalobacter salexigens DSM 3043, complete genome
All Bacteria (B)	>NC_008011	1 Lawsonia intracellularis PHE/MN1-00
All Bacteria (B)	>NC_008012	1 Lawsonia intracellularis PHE/MN1-00 plasmid 1
All Bacteria (B)	>NC_008013	1 Lawsonia intracellularis PHE/MN1-00 plasmid 2
All Bacteria (B)	>NC_008014	1 Lawsonia intracellularis PHE/MN1-00 plasmid 3
All Bacteria (B)	>NC_008054	1 Lactobacillus delbrueckii subsp	bulgaricus ATCC 11842 = JCM 1002, complete sequence
All Bacteria (B)	>NC_008278	1 Frankia alni ACN14a, complete sequence
All Bacteria (B)	>NC_008555	1 Listeria welshimeri serovar 6b str	SLCC5334, complete sequence
All Bacteria (B)	>NC_008571	1 Gramella forsetii KT0803, complete sequence
All Bacteria (B)	>NC_008702	1 Azoarcus sp	BH72, complete sequence
All Bacteria (B)	>NC_009142	1 Saccharopolyspora erythraea NRRL 2338, complete sequence
All Bacteria (B)	>NC_009480	1 Clavibacter michiganensis subsp	michiganensis NCPPB 382, complete sequence
All Bacteria (B)	>NC_009478	1 Clavibacter michiganensis subsp	michiganensis NCPPB 382 plasmid pCM1, complete sequence
All Bacteria (B)	>NC_009479	1 Clavibacter michiganensis subsp	michiganensis NCPPB 382 plasmid pCM2, complete sequence
All Bacteria (B)	>NC_009481	1 Synechococcus WH7803 complete genome sequence
All Bacteria (B)	>NC_009482	1 Synechococcus sp	RCC307 genomic DNA sequence
All Bacteria (B)	>NC_009488	1 Orientia tsutsugamushi str	Boryong, complete sequence
All Bacteria (B)	>NC_009495	1 Clostridium botulinum A str	ATCC 3502 chromosome, complete genome
All Bacteria (B)	>NC_009496	1 Clostridium botulinum A str	ATCC 3502 plasmid pBOT3502, complete sequence
All Bacteria (B)	>NC_009497	1 Mycoplasma agalactiae PG2 chromosome, complete sequence
All Bacteria (B)	>NC_009613	3 Flavobacterium psychrophilum JIP02/86 complete genome
All Bacteria (B)	>NC_010125	1 Gluconacetobacter diazotrophicus PA1 5, complete sequence
All Bacteria (B)	>NC_010124	1 Gluconacetobacter diazotrophicus PA1 5 plasmid pGDIPal5I, complete sequence
All Bacteria (B)	>NC_010123	1 Gluconacetobacter diazotrophicus PA1 5 plasmid pGDIPal5II, complete sequence
All Bacteria (B)	>NC_010162	1 Sorangium cellulosum So ce56, complete sequence
All Bacteria (B)	>NC_010170	1 Bordetella petrii, complete sequence
All Bacteria (B)	>NC_010280	2 Chlamydia trachomatis L2b/UCH-1/proctitis, complete sequence
All Bacteria (B)	>NC_010287	1 Chlamydia trachomatis 434/Bu chromosome, complete genome
All Bacteria (B)	>NC_010397	1 Mycobacterium abscessus chromosome, complete sequence
All Bacteria (B)	>NC_010394	1 Mycobacterium abscessus plasmid, complete sequence
All Bacteria (B)	>NC_010407	1 Clavibacter sepedonicus, complete sequence
All Bacteria (B)	>NC_010399	1 Clavibacter sepedonicus plasmid pCS1, complete sequence
All Bacteria (B)	>NC_010408	1 Clavibacter sepedonicus plasmid pCSL1, complete sequence
All Bacteria (B)	>NC_010410	1 Acinetobacter baumannii str	AYE, complete genome
All Bacteria (B)	>NC_010401	1 Acinetobacter baumannii str	AYE plasmid p1ABAYE, complete genome
All Bacteria (B)	>NC_010402	1 Acinetobacter baumannii str	AYE plasmid p2ABAYE, complete genome
All Bacteria (B)	>NC_010404	1 Acinetobacter baumannii str	AYE plasmid p3ABAYE, complete genome
All Bacteria (B)	>NC_010403	1 Acinetobacter baumannii str	AYE plasmid p4ABAYE, complete genome
All Bacteria (B)	>NC_010544	1 Candidatus Phytoplasma australiense complete genome
All Bacteria (B)	>NC_010545	1 Corynebacterium urealyticum DSM 7109, complete sequence
All Bacteria (B)	>NC_010554	1 Proteus mirabilis HI4320, complete sequence
All Bacteria (B)	>NC_010555	1 Proteus mirabilis HI4320 plasmid pHI4320, complete sequence
All Bacteria (B)	>NC_010645	1 Bordetella avium 197N, complete sequence
All Bacteria (B)	>NC_010688	1 Xanthomonas campestris pv	campestris complete genome, strain B100
All Bacteria (B)	>NC_010943	1 Stenotrophomonas maltophilia K279a, complete sequence
All Bacteria (B)	>NC_012988	1 Methylorubrum extorquens AM1, complete sequence
All Bacteria (B)	>NC_012987	1 Methylorubrum extorquens AM1 plasmid p1METDI, complete sequence
All Bacteria (B)	>NC_012989	1 Methylorubrum extorquens AM1 plasmid p2METDI, complete sequence
All Bacteria (B)	>NC_013016	1 Neisseria meningitidis alpha14, complete sequence
All Bacteria (B)	>NC_013315	1 Clostridioides difficile CD196, complete sequence
All Bacteria (B)	>NC_013511	1 Mycoplasma hominis ATCC 23114, complete sequence
All Bacteria (B)	>NC_013722	1 Xanthomonas albilineans GPE PC73 complete genome
All Bacteria (B)	>NC_017557	1 Xanthomonas albilineans str	GPE PC73, plasmid, complete genome
All Bacteria (B)	>NC_017556	1 Xanthomonas albilineans str	GPE PC73, plasmid, complete genome
All Bacteria (B)	>NC_017555	1 Xanthomonas albilineans str	GPE PC73, plasmid, complete genome
All Bacteria (B)	>NC_013948	1 Mycoplasma agalactiae 5632 chromosome, complete sequence
All Bacteria (B)	>NC_014032	1 Salinibacter ruber M8, complete sequence
All Bacteria (B)	>NC_014026	1 Salinibacter ruber M8 plasmid pSR11, complete sequence
All Bacteria (B)	>NC_014028	1 Salinibacter ruber M8 plasmid pSR56, complete sequence
All Bacteria (B)	>NC_014030	1 Salinibacter ruber M8 plasmid pSR61, complete sequence
All Bacteria (B)	>NC_014157	1 Salinibacter ruber M8 plasmid pSR84, complete sequence
All Bacteria (B)	>NC_008513	1 Buchnera aphidicola BCc, complete genome
All Bacteria (B)	>NC_011878	1 Buchnera aphidicola BCc plasmid pLeu-BCc, complete sequence
All Bacteria (B)	>NC_013361	1 Escherichia coli O26:H11 str	11368, complete sequence
All Bacteria (B)	>NC_013369	1 Escherichia coli O26:H11 str	11368 plasmid pO26_1, complete sequence
All Bacteria (B)	>NC_013362	1 Escherichia coli O26:H11 str	11368 plasmid pO26_2, complete sequence
All Bacteria (B)	>NC_013363	1 Escherichia coli O26:H11 str	11368 plasmid pO26_3, complete sequence
All Bacteria (B)	>NC_014543	1 Escherichia coli O26:H11 str	11368 plasmid pO26_4, complete sequence
All Bacteria (B)	>NC_002179	2 Chlamydia pneumoniae AR39, complete sequence
All Bacteria (B)	>NC_014006	1 Sphingobium japonicum UT26S DNA, chromosome 1, complete genome
All Bacteria (B)	>NC_014013	1 Sphingobium japonicum UT26S DNA, chromosome 2, complete genome
All Bacteria (B)	>NC_014007	1 Sphingobium japonicum UT26S plasmid pCHQ1 DNA, complete genome
All Bacteria (B)	>NC_014005	1 Sphingobium japonicum UT26S plasmid pUT1 DNA, complete genome
All Bacteria (B)	>NC_014009	1 Sphingobium japonicum UT26S plasmid pUT2 DNA, complete genome
All Bacteria (B)	>NC_013929	1 Streptomyces scabiei 87	22, complete sequence
All Bacteria (B)	>NC_014012	1 Shewanella violacea DSS12 DNA, complete genome
All Bacteria (B)	>NC_012973	1 Helicobacter pylori B38, complete sequence
All Bacteria (B)	>NC_013504	1 Lactobacillus johnsonii FI9785, complete sequence
All Bacteria (B)	>NC_013505	1 Lactobacillus johnsonii FI9785 plasmid p9785L, complete sequence
All Bacteria (B)	>NC_012552	1 Lactobacillus johnsonii FI9785 plasmid p9785S, complete sequence
All Bacteria (B)	>NC_011753	2 Vibrio tasmaniensis LGP32 chromosome 1, complete sequence
All Bacteria (B)	>NC_011744	2 Vibrio tasmaniensis LGP32 chromosome 2, complete sequence
All Bacteria (B)	>NC_006461	1 Thermus thermophilus HB8 chromosome, complete genome
All Bacteria (B)	>NC_006462	1 Thermus thermophilus HB8 plasmid pTT27, complete sequence
All Bacteria (B)	>NC_006463	1 Thermus thermophilus HB8 plasmid pTT8, complete sequence
All Bacteria (B)	>NC_013961	1 Erwinia amylovora CFBP1430, complete sequence
All Bacteria (B)	>NC_013957	1 Erwinia amylovora CFBP1430 plasmid pEA29, complete sequence
All Bacteria (B)	>NC_013928	1 Streptococcus mutans NN2025, complete sequence
All Bacteria (B)	>NC_014215	1 Propionibacterium freudenreichii subsp	shermanii CIRM-BIA1, complete sequence
All Bacteria (B)	>NC_013861	1 Legionella longbeachae NSW150, complete sequence
All Bacteria (B)	>NC_014544	1 Legionella longbeachae NSW150 plasmid pLLO, complete sequence
All Bacteria (B)	>NC_012925	1 Streptococcus suis P1/7, complete sequence
All Bacteria (B)	>NC_013949	1 Helicobacter mustelae 12198, complete sequence
All Bacteria (B)	>NC_003062	2 Agrobacterium fabrum str	C58 chromosome circular, complete sequence
All Bacteria (B)	>NC_003063	2 Agrobacterium fabrum str	C58 chromosome linear, complete sequence
All Bacteria (B)	>NC_003064	2 Agrobacterium fabrum str	C58 plasmid At, complete sequence
All Bacteria (B)	>NC_003065	3 Agrobacterium fabrum str	C58 plasmid Ti, complete sequence
All Bacteria (B)	>NC_007761	1 Rhizobium etli CFN 42, complete genome
All Bacteria (B)	>NC_007762	1 Rhizobium etli CFN 42 plasmid p42a, complete sequence
All Bacteria (B)	>NC_007763	1 Rhizobium etli CFN 42 plasmid p42b, complete sequence
All Bacteria (B)	>NC_007764	1 Rhizobium etli CFN 42 plasmid p42c, complete sequence
All Bacteria (B)	>NC_007765	1 Rhizobium etli CFN 42 plasmid p42e, complete sequence
All Bacteria (B)	>NC_007766	1 Rhizobium etli CFN 42 plasmid p42f, complete sequence
All Bacteria (B)	>NC_004041	2 Rhizobium etli CFN 42 plasmid symbiotic plasmid p42d, complete sequence
All Bacteria (B)	>NC_014148	1 Planctopirus limnophila DSM 3776, complete sequence
All Bacteria (B)	>NC_014149	1 Planctopirus limnophila DSM 3776 plasmid pPLIM01, complete sequence
All Bacteria (B)	>NC_014212	1 Meiothermus silvanus DSM 9946, complete genome
All Bacteria (B)	>NC_014213	1 Meiothermus silvanus DSM 9946 plasmid pMESIL01, complete sequence
All Bacteria (B)	>NC_014214	1 Meiothermus silvanus DSM 9946 plasmid pMESIL02, complete sequence
All Bacteria (B)	>NC_014171	1 Bacillus thuringiensis BMB171, complete sequence
All Bacteria (B)	>NC_014172	1 Bacillus thuringiensis BMB171 plasmid pBMB171, complete sequence
All Bacteria (B)	>NC_014216	1 Desulfurivibrio alkaliphilus AHT 2, complete sequence
All Bacteria (B)	>NC_014158	1 Tsukamurella paurometabola DSM 20162, complete genome
All Bacteria (B)	>NC_014159	1 Tsukamurella paurometabola DSM 20162 plasmid pTpau01, complete sequence
All Bacteria (B)	>NC_014166	1 Arcobacter nitrofigilis DSM 7299, complete sequence
All Bacteria (B)	>NC_014147	1 Moraxella catarrhalis BBH18, complete genome
All Bacteria (B)	>NC_014100	1 Caulobacter segnis ATCC 21756, complete genome
All Bacteria (B)	>NC_014169	1 Bifidobacterium longum subsp	longum JDM301, complete genome
All Bacteria (B)	>NC_017297	1 Clostridium botulinum F str	230613, complete genome
All Bacteria (B)	>NC_017298	1 Clostridium botulinum F str	230613 plasmid pCBF, complete sequence
All Bacteria (B)	>NC_014218	1 Arcanobacterium haemolyticum DSM 20595, complete genome
All Bacteria (B)	>NC_016582	1 Streptomyces bingchenggensis BCW-1, complete sequence
All Bacteria (B)	>NC_014220	1 Syntrophothermus lipocalidus DSM 12680, complete genome
All Bacteria (B)	>NC_014221	1 Truepera radiovictrix DSM 17093, complete genome
All Bacteria (B)	>NC_014206	1 Geobacillus sp	C56-T3, complete genome
All Bacteria (B)	>NC_017434	1 Chlamydia trachomatis D-EC, complete sequence
All Bacteria (B)	>NC_017435	1 Chlamydia trachomatis D-EC plasmid pCTDEC1, complete sequence
All Bacteria (B)	>NC_014136	1 Leuconostoc kimchii IMSNU 11154, complete genome
All Bacteria (B)	>NC_014131	1 Leuconostoc kimchii IMSNU 11154 plasmid LkipL4701, complete sequence
All Bacteria (B)	>NC_014132	1 Leuconostoc kimchii IMSNU 11154 plasmid LkipL4704, complete sequence
All Bacteria (B)	>NC_014133	1 Leuconostoc kimchii IMSNU 11154 plasmid LkipL4719, complete sequence
All Bacteria (B)	>NC_014134	1 Leuconostoc kimchii IMSNU 11154 plasmid LkipL4726, complete sequence
All Bacteria (B)	>NC_014135	1 Leuconostoc kimchii IMSNU 11154 plasmid LkipL48, complete sequence
All Bacteria (B)	>NC_007384	1 Shigella sonnei Ss046, complete genome
All Bacteria (B)	>NC_009345	1 Shigella sonnei Ss046 plasmid pSS046_spA, complete sequence
All Bacteria (B)	>NC_009346	1 Shigella sonnei Ss046 plasmid pSS046_spB, complete sequence
All Bacteria (B)	>NC_009347	1 Shigella sonnei Ss046 plasmid pSS046_spC, complete sequence
All Bacteria (B)	>NC_007385	1 Shigella sonnei Ss046 plasmid pSS_046, complete sequence
All Bacteria (B)	>NC_009494	2 Legionella pneumophila str	Corby, complete genome
All Bacteria (B)	>NC_004342	2 Leptospira interrogans serovar Lai str	56601 chromosome I, complete sequence
All Bacteria (B)	>NC_004343	2 Leptospira interrogans serovar Lai str	56601 chromosome II, complete sequence
All Bacteria (B)	>NC_004829	2 Mycoplasma gallisepticum str	R(low), complete sequence
All Bacteria (B)	>NC_014153	1 Thiomonas intermedia K12, complete genome
All Bacteria (B)	>NC_014154	1 Thiomonas intermedia K12 plasmid pTINT01, complete sequence
All Bacteria (B)	>NC_014155	1 Thiomonas intermedia K12 plasmid pTINT02, complete sequence
All Bacteria (B)	>NC_014125	1 Legionella pneumophila 2300/99 Alcoy, complete genome
All Bacteria (B)	>NC_014165	1 Thermobispora bispora DSM 43833, complete sequence
All Bacteria (B)	>NC_017439	1 Chlamydia trachomatis E/150, complete genome
All Bacteria (B)	>NC_017429	1 Chlamydia trachomatis G/9768, complete genome
All Bacteria (B)	>NC_017430	1 Chlamydia trachomatis G/11222, complete genome
All Bacteria (B)	>NC_017440	1 Chlamydia trachomatis G/11074, complete genome
All Bacteria (B)	>NC_017431	1 Chlamydia trachomatis E/11023, complete genome
All Bacteria (B)	>NC_017217	1 Bifidobacterium animalis subsp	lactis V9, complete sequence
All Bacteria (B)	>NC_014225	1 Waddlia chondrophila WSU 86-1044, complete genome
All Bacteria (B)	>NC_014226	1 Waddlia chondrophila WSU 86-1044 plasmid pWc, complete sequence
All Bacteria (B)	>NC_017432	1 Chlamydia trachomatis G/9301, complete genome
All Bacteria (B)	>NC_014168	1 Segniliparus rotundus DSM 44985, complete genome
All Bacteria (B)	>NC_014150	1 Brachyspira murdochii DSM 12563, complete genome
All Bacteria (B)	>NC_014151	1 Cellulomonas flavigena DSM 20109, complete genome
All Bacteria (B)	>NC_014117	1 Paraburkholderia sp	CCGE1002 chromosome 1, complete sequence
All Bacteria (B)	>NC_014118	1 Paraburkholderia sp	CCGE1002 chromosome 2, complete sequence
All Bacteria (B)	>NC_014119	1 Paraburkholderia sp	CCGE1002 chromosome 3, complete sequence
All Bacteria (B)	>NC_014120	1 Paraburkholderia sp	CCGE1002 plasmid pBC201, complete sequence
All Bacteria (B)	>NC_014098	1 Kyrpidia tusciae DSM 2912, complete genome
All Bacteria (B)	>NC_014217	1 Starkeya novella DSM 506, complete genome
All Bacteria (B)	>NC_014152	1 Thermincola potens JR, complete sequence
All Bacteria (B)	>NC_014209	1 Thermoanaerobacter mathranii subsp	mathranii str	A3, complete genome
All Bacteria (B)	>NC_014210	1 Nocardiopsis dassonvillei subsp	dassonvillei DSM 43111 chromosome 1, complete sequence
All Bacteria (B)	>NC_014211	1 Nocardiopsis dassonvillei subsp	dassonvillei DSM 43111 chromosome 2, complete sequence
All Bacteria (B)	>NC_017436	1 Chlamydia trachomatis D-LC, complete sequence
All Bacteria (B)	>NC_017433	1 Chlamydia trachomatis D-LC plasmid pCTDLC1, complete sequence
All Bacteria (B)	>NC_014207	1 Methylotenera versatilis 301, complete sequence
All Bacteria (B)	>NC_014109	1 Candidatus Riesia pediculicola USDA, complete genome
All Bacteria (B)	>NC_013962	1 Candidatus Riesia pediculicola USDA plasmid pPAN, complete sequence
All Bacteria (B)	>NC_014219	1 [Bacillus] selenitireducens MLS10, complete sequence
All Bacteria (B)	>NC_013766	2 Listeria monocytogenes 08-5578, complete sequence
All Bacteria (B)	>NC_013767	1 Listeria monocytogenes 08-5578 plasmid pLM5578, complete sequence
All Bacteria (B)	>NC_013446	2 Comamonas thiooxydans, complete sequence
All Bacteria (B)	>NC_013418	2 Blattabacterium sp	(Periplaneta americana) str	BPLAN, complete sequence
All Bacteria (B)	>NC_013419	1 Blattabacterium sp	(Periplaneta americana) str	BPLAN plasmid pBPLAN, complete sequence
All Bacteria (B)	>NC_017355	1 Helicobacter pylori v225d, complete genome
All Bacteria (B)	>NC_017383	1 Helicobacter pylori v225d plasmid pHPv225d, complete sequence
All Bacteria (B)	>NC_014315	1 Nitrosococcus watsonii C-113, complete sequence
All Bacteria (B)	>NC_014316	1 Nitrosococcus watsonii C-113 plasmid pNWAT01, complete sequence
All Bacteria (B)	>NC_014317	1 Nitrosococcus watsonii C-113 plasmid pNWAT02, complete sequence
All Bacteria (B)	>NC_014313	1 Hyphomicrobium denitrificans ATCC 51888, complete sequence
All Bacteria (B)	>NC_014314	1 Dehalogenimonas lykanthroporepellens BL-DC-9, complete genome
All Bacteria (B)	>NC_017949	1 Lactococcus lactis subsp	cremoris NZ9000, complete genome
All Bacteria (B)	>NC_014323	1 Herbaspirillum seropedicae SmR1, complete genome
All Bacteria (B)	>NC_014335	1 Bacillus cereus biovar anthracis str	CI, complete genome
All Bacteria (B)	>NC_014333	1 Bacillus cereus biovar anthracis str	CI plasmid pBAslCI14, complete sequence
All Bacteria (B)	>NC_014331	1 Bacillus cereus biovar anthracis str	CI plasmid pCI-XO1, complete sequence
All Bacteria (B)	>NC_014332	1 Bacillus cereus biovar anthracis str	CI plasmid pCI-XO2, complete sequence
All Bacteria (B)	>NC_014328	1 Clostridium ljungdahlii DSM 13528, complete genome
All Bacteria (B)	>NC_014329	2 Corynebacterium pseudotuberculosis FRC41, complete sequence
All Bacteria (B)	>NC_014330	1 Brachyspira pilosicoli 95/1000, complete genome
All Bacteria (B)	>NC_014363	1 Olsenella uli DSM 7084, complete genome
All Bacteria (B)	>NC_021025	1 Mycoplasma mycoides subsp	mycoides SC str	Gladysdale, complete sequence
All Bacteria (B)	>NC_018581	1 Gordonia sp	KTR9, complete sequence
All Bacteria (B)	>NC_018582	1 Gordonia sp	KTR9 plasmid pGKT1, complete sequence
All Bacteria (B)	>NC_018580	1 Gordonia sp	KTR9 plasmid pGKT2, complete sequence
All Bacteria (B)	>NC_018583	1 Gordonia sp	KTR9 plasmid pGKT3, complete sequence
All Bacteria (B)	>NC_017504	1 Mycoplasma pneumoniae FH, complete genome
All Bacteria (B)	>NC_014365	1 Desulfarculus baarsii DSM 2075, complete genome
All Bacteria (B)	>NC_014364	1 Sediminispirochaeta smaragdinae DSM 11293, complete sequence
All Bacteria (B)	>NC_014370	1 Prevotella melaninogenica ATCC 25845 chromosome I, complete sequence
All Bacteria (B)	>NC_014371	1 Prevotella melaninogenica ATCC 25845 chromosome II, complete sequence
All Bacteria (B)	>NC_014375	1 Brevundimonas subvibrioides ATCC 15264, complete genome
All Bacteria (B)	>NC_014376	1 [Clostridium] saccharolyticum WM1, complete sequence
All Bacteria (B)	>NC_014377	1 Thermosediminibacter oceani DSM 16646, complete genome
All Bacteria (B)	>NC_017301	2 Corynebacterium pseudotuberculosis C231, complete sequence
All Bacteria (B)	>NC_014378	1 Acetohalobium arabaticum DSM 5501, complete genome
All Bacteria (B)	>NC_017300	2 Corynebacterium pseudotuberculosis 1002, complete sequence
All Bacteria (B)	>NC_017338	1 Staphylococcus aureus subsp	aureus JKD6159, complete sequence
All Bacteria (B)	>NC_017339	1 Staphylococcus aureus subsp	aureus JKD6159 plasmid pSaa6159, complete sequence
All Bacteria (B)	>NC_014387	1 Butyrivibrio proteoclasticus B316 chromosome 1, complete sequence
All Bacteria (B)	>NC_014388	1 Butyrivibrio proteoclasticus B316 chromosome 2, complete sequence
All Bacteria (B)	>NC_014390	1 Butyrivibrio proteoclasticus B316 plasmid pCY186, complete sequence
All Bacteria (B)	>NC_014389	1 Butyrivibrio proteoclasticus B316 plasmid pCY360, complete sequence
All Bacteria (B)	>NC_014392	1 Caldicellulosiruptor obsidiansis OB47, complete genome
All Bacteria (B)	>NC_014391	1 Micromonospora aurantiaca ATCC 27029, complete genome
All Bacteria (B)	>NC_014394	1 Gallionella capsiferriformans ES-2, complete sequence
All Bacteria (B)	>NC_014393	1 Clostridium cellulovorans 743B, complete genome
All Bacteria (B)	>NC_017341	1 Staphylococcus aureus subsp	aureus str	JKD6008, complete genome
All Bacteria (B)	>NC_014410	1 Thermoanaerobacterium thermosaccharolyticum DSM 571, complete genome
All Bacteria (B)	>NC_014448	1 Mycoplasma hyorhinis HUB-1, complete genome
All Bacteria (B)	>NZ_CP047260	1 Pseudomonas syringae pv	maculicola str	ES4326 chromosome, complete genome
All Bacteria (B)	>NZ_CP047262	1 Pseudomonas syringae pv	maculicola str	ES4326 plasmid pPma4326A, complete sequence
All Bacteria (B)	>NZ_CP047263	1 Pseudomonas syringae pv	maculicola str	ES4326 plasmid pPma4326B, complete sequence
All Bacteria (B)	>NZ_CP047264	1 Pseudomonas syringae pv	maculicola str	ES4326 plasmid pPma4326E, complete sequence
All Bacteria (B)	>NZ_CP047261	1 Pseudomonas syringae pv	maculicola str	ES4326 plasmid pPma4326F, complete sequence
All Bacteria (B)	>NZ_CP042804	1 Pseudomonas amygdali pv	tabaci str	ATCC 11528 chromosome, complete genome
All Bacteria (B)	>NZ_CP042805	1 Pseudomonas amygdali pv	tabaci str	ATCC 11528 plasmid pTab1, complete sequence
All Bacteria (B)	>NZ_CP031225	1 Pseudomonas amygdali pv	lachrymans str	M301315 chromosome, complete genome
All Bacteria (B)	>NZ_CP031226	1 Pseudomonas amygdali pv	lachrymans str	M301315 plasmid pMPPla107, complete sequence
All Bacteria (B)	>NZ_CP031227	1 Pseudomonas amygdali pv	lachrymans str	M301315 plasmid pPla107-1, complete sequence
All Bacteria (B)	>NZ_CP031228	1 Pseudomonas amygdali pv	lachrymans str	M301315 plasmid pPla107-2
All Bacteria (B)	>NC_020419	1 Uncultured Termite group 1 bacterium phylotype Rs-D17, complete sequence
All Bacteria (B)	>NC_020420	1 Uncultured Termite group 1 bacterium phylotype Rs-D17 plasmid pTGRD1, complete sequence
All Bacteria (B)	>NC_020421	1 Uncultured Termite group 1 bacterium phylotype Rs-D17 plasmid pTGRD2, complete sequence
All Bacteria (B)	>NC_020422	1 Uncultured Termite group 1 bacterium phylotype Rs-D17 plasmid pTGRD3, complete sequence
All Bacteria (B)	>NC_020449	1 Candidatus Cloacimonas acidaminovorans str	Evry, complete sequence
All Bacteria (B)	>NC_004347	2 Shewanella oneidensis MR-1 chromosome, complete genome
All Bacteria (B)	>NC_004349	1 Shewanella oneidensis MR-1 plasmid megaplasmid, complete sequence
All Bacteria (B)	>NC_012778	1 [Eubacterium] eligens ATCC 27750, complete sequence
All Bacteria (B)	>NC_012782	1 [Eubacterium] eligens ATCC 27750 plasmid unnamed, complete sequence
All Bacteria (B)	>NC_012780	1 [Eubacterium] eligens ATCC 27750 plasmid unnamed, complete sequence
All Bacteria (B)	>NC_017309	1 Edwardsiella tarda FL6-60, complete sequence
All Bacteria (B)	>NC_017318	1 Edwardsiella tarda FL6-60 plasmid pFL6-60, complete sequence
All Bacteria (B)	>NC_017448	1 Fibrobacter succinogenes subsp	succinogenes S85, complete genome
All Bacteria (B)	>NC_014479	1 Bacillus subtilis subsp	spizizenii str	W23, complete sequence
All Bacteria (B)	>NC_014483	2 Paenibacillus polymyxa E681, complete sequence
All Bacteria (B)	>NC_014494	1 Streptococcus pneumoniae AP200, complete sequence
All Bacteria (B)	>NC_014500	1 Dickeya dadantii 3937, complete sequence
All Bacteria (B)	>NC_014484	1 Spirochaeta thermophila DSM 6192, complete sequence
All Bacteria (B)	>NC_014498	1 Streptococcus pneumoniae 670-6B, complete genome
All Bacteria (B)	>NC_014501	1 Gloeothece verrucosa PCC 7822, complete sequence
All Bacteria (B)	>NC_014533	1 Gloeothece verrucosa PCC 7822 plasmid Cy782201, complete sequence
All Bacteria (B)	>NC_014534	1 Gloeothece verrucosa PCC 7822 plasmid Cy782202, complete sequence
All Bacteria (B)	>NC_014502	1 Gloeothece verrucosa PCC 7822 plasmid Cy782203, complete sequence
All Bacteria (B)	>NC_014503	1 Gloeothece verrucosa PCC 7822 plasmid Cy782204, complete sequence
All Bacteria (B)	>NC_014504	1 Gloeothece verrucosa PCC 7822 plasmid Cy782205, complete sequence
All Bacteria (B)	>NC_014535	1 Gloeothece verrucosa PCC 7822 plasmid Cy782206, complete sequence
All Bacteria (B)	>NC_014506	1 Sulfurimonas autotrophica DSM 16294, complete genome
All Bacteria (B)	>NC_015958	1 Thermoanaerobacter wiegelii Rt8	B1, complete genome
All Bacteria (B)	>NC_017934	1 Mesotoga prima MesG1	Ag	4
[truncated: 159,792 more rows]

## Sheet: CpG+ Octamer Counts
Human	TOTAL NUCLEOTIDES in DATASET	1928948574				All viruses	TOTAL NUCLEOTIDES in DATASET	316919592				DNA viruses	TOTAL NUCLEOTIDES in DATASET	3758005				All bacteria	TOTAL NUCLEOTIDES in DATASET	9627299129				Pathogenic Bacteria	TOTAL NUCLEOTIDES in DATASET	3063235816				All fungus	TOTAL NUCLEOTIDES in DATASET	7587751061				Pathogenic Fungus	TOTAL NUCLEOTIDES in DATASET	841913454				All Worms	TOTAL NUCLEOTIDES in DATASET	35115254105				Pathogenic Worms	TOTAL NUCLEOTIDES in DATASET
(H)	TOTAL CpG sites	16709582				(V)	TOTAL CpG sites	16082010				(PV)	TOTAL CpG sites	194883				(B)	TOTAL CpG sites	673989273				(PB)	TOTAL CpG sites	373850722				(F)	TOTAL CpG sites	378978516				(PF)	TOTAL CpG sites	38991405				(W)	TOTAL CpG sites	1101378772				(PW)	TOTAL CpG sites
	Strand Forward Count	Strand Rev Count	Total Count	Count / Nucelotides			Strand Forward Count	Strand Rev Count	Total Count	Frequency (Count / Nucelotides)	Adjusted to Human (Frequency / Human Frequency)		Strand Forward Count	Strand Rev Count	Total Count	Frequency (Count / Nucelotides)	Adjusted to Human (Frequency / Human Frequency)		Strand Forward Count	Strand Rev Count	Total Count	Frequency (Count / Nucelotides)	Adjusted to Human (Frequency / Human Frequency)		Strand Forward Count	Strand Rev Count	Total Count	Frequency (Count / Nucelotides)	Adjusted to Human (Frequency / Human Frequency)		Strand Forward Count	Strand Rev Count	Total Count	Frequency (Count / Nucelotides)	Adjusted to Human (Frequency / Human Frequency)		Strand Forward Count	Strand Rev Count	Total Count	Frequency (Count / Nucelotides)	Adjusted to Human (Frequency / Human Frequency)		Strand Forward Count	Strand Rev Count	Total Count	Frequency (Count / Nucelotides)	Adjusted to Human (Frequency / Human Frequency)		Strand Forward Count
AAACGAAA	13766	13620	27386	1.41974e-05		AAACGAAA	9334	7862	17196	5.42598e-05	3.82182	AAACGAAA	150	36	186	4.94943e-05	3.48616	AAACGAAA	192780	195491	388271	4.03302e-05	2.84068	AAACGAAA	81295	83313	164608	5.37366e-05	3.78497	AAACGAAA	139094	139209	278303	3.66779e-05	2.58343	AAACGAAA	15984	16004	31988	3.79944e-05	2.67616	AAACGAAA	1774696	1769998	3544694	0.000100945	7.11009	AAACGAAA	675233
AAACGAAC	5579	5742	11321	5.869e-06		AAACGAAC	4683	4494	9177	2.89569e-05	4.93387	AAACGAAC	48	31	79	2.10218e-05	3.58184	AAACGAAC	107411	108417	215828	2.24183e-05	3.81979	AAACGAAC	42055	42430	84485	2.75803e-05	4.69932	AAACGAAC	90915	91495	182410	2.40401e-05	4.09611	AAACGAAC	10464	10709	21173	2.51487e-05	4.285	AAACGAAC	734656	733507	1468163	4.18098e-05	7.12384	AAACGAAC	325433
AAACGAAG	10179	10072	20251	1.04985e-05		AAACGAAG	5348	4382	9730	3.07018e-05	2.92441	AAACGAAG	54	57	111	2.95369e-05	2.81345	AAACGAAG	125944	128056	254000	2.63833e-05	2.51306	AAACGAAG	47373	49294	96667	3.15572e-05	3.00588	AAACGAAG	122278	122398	244676	3.22462e-05	3.07151	AAACGAAG	14456	14473	28929	3.4361e-05	3.27296	AAACGAAG	833048	831753	1664801	4.74096e-05	4.51586	AAACGAAG	360185
AAACGAAT	9816	9745	19561	1.01408e-05		AAACGAAT	6544	6241	12785	4.03415e-05	3.97815	AAACGAAT	82	41	123	3.27301e-05	3.22758	AAACGAAT	151434	151732	303166	3.14902e-05	3.10531	AAACGAAT	65739	65471	131210	4.28338e-05	4.22392	AAACGAAT	95505	95977	191482	2.52357e-05	2.48854	AAACGAAT	10942	11106	22048	2.6188e-05	2.58245	AAACGAAT	1134881	1137884	2272765	6.4723e-05	6.38246	AAACGAAT	466123
AAACGACA	7247	7213	14460	7.49631e-06		AAACGACA	4914	4451	9365	2.95501e-05	3.94195	AAACGACA	71	21	92	2.44811e-05	3.26575	AAACGACA	111449	113141	224590	2.33285e-05	3.11199	AAACGACA	43457	44894	88351	2.88424e-05	3.84754	AAACGACA	113286	113428	226714	2.98789e-05	3.98582	AAACGACA	12459	12442	24901	2.95767e-05	3.9455	AAACGACA	693724	692591	1386315	3.9479e-05	5.26646	AAACGACA	283127
AAACGACC	3865	3856	7721	4.0027e-06		AAACGACC	3517	3514	7031	2.21854e-05	5.54262	AAACGACC	35	45	80	2.12879e-05	5.31838	AAACGACC	96416	96074	192490	1.99942e-05	4.99518	AAACGACC	32763	33210	65973	2.1537e-05	5.38063	AAACGACC	86721	86685	173406	2.28534e-05	5.7095	AAACGACC	9828	9965	19793	2.35095e-05	5.87342	AAACGACC	422519	422066	844585	2.40518e-05	6.0089	AAACGACC	183437
AAACGACG	1118	1164	2282	1.18303e-06		AAACGACG	3951	3944	7895	2.49117e-05	21.0576	AAACGACG	63	45	108	2.87387e-05	24.2925	AAACGACG	111026	110318	221344	2.29913e-05	19.4343	AAACGACG	40976	40040	81016	2.64478e-05	22.3561	AAACGACG	97298	97505	194803	2.56734e-05	21.7014	AAACGACG	10521	10591	21112	2.50762e-05	21.1966	AAACGACG	442355	441049	883404	2.51573e-05	21.2652	AAACGACG	188950
AAACGACT	5829	5823	11652	6.0406e-06		AAACGACT	3545	3522	7067	2.2299e-05	3.69153	AAACGACT	43	44	87	2.31506e-05	3.8325	AAACGACT	91384	92200	183584	1.90691e-05	3.15683	AAACGACT	35238	35680	70918	2.31513e-05	3.83262	AAACGACT	83344	83417	166761	2.19777e-05	3.63833	AAACGACT	9037	8818	17855	2.12076e-05	3.51085	AAACGACT	579877	579173	1159050	3.3007e-05	5.4642	AAACGACT	243316
AAACGAGA	8976	8866	17842	9.2496e-06		AAACGAGA	4763	4121	8884	2.80323e-05	3.03066	AAACGAGA	42	33	75	1.99574e-05	2.15765	AAACGAGA	96131	97935	194066	2.01579e-05	2.17933	AAACGAGA	36422	37410	73832	2.41026e-05	2.6058	AAACGAGA	123908	124088	247996	3.26837e-05	3.53353	AAACGAGA	14075	14004	28079	3.33514e-05	3.60571	AAACGAGA	788109	785881	1573990	4.48235e-05	4.846	AAACGAGA	317953
AAACGAGC	4517	4522	9039	4.68597e-06		AAACGAGC	3470	3272	6742	2.12735e-05	4.53983	AAACGAGC	38	57	95	2.52794e-05	5.39469	AAACGAGC	98872	100287	199159	2.06869e-05	4.41464	AAACGAGC	35957	37405	73362	2.39492e-05	5.11082	AAACGAGC	101867	101910	203777	2.6856e-05	5.73116	AAACGAGC	11309	11066	22375	2.65764e-05	5.67147	AAACGAGC	469841	471340	941181	2.68026e-05	5.71976	AAACGAGC	200054
AAACGAGG	8018	8121	16139	8.36673e-06		AAACGAGG	3337	3023	6360	2.00682e-05	2.39857	AAACGAGG	50	41	91	2.4215e-05	2.8942	AAACGAGG	76409	76172	152581	1.58488e-05	1.89426	AAACGAGG	24359	24416	48775	1.59227e-05	1.9031	AAACGAGG	104504	105192	209696	2.76361e-05	3.3031	AAACGAGG	11906	12129	24035	2.85481e-05	3.41209	AAACGAGG	474391	475670	950061	2.70555e-05	3.2337	AAACGAGG	192086
AAACGAGT	6059	6010	12069	6.25678e-06		AAACGAGT	3952	3537	7489	2.36306e-05	3.7768	AAACGAGT	63	103	166	4.41724e-05	7.05993	AAACGAGT	76439	77849	154288	1.60261e-05	2.5614	AAACGAGT	29739	31049	60788	1.98444e-05	3.17166	AAACGAGT	84663	84373	169036	2.22775e-05	3.56054	AAACGAGT	9045	9244	18289	2.17231e-05	3.47194	AAACGAGT	564115	565737	1129852	3.21755e-05	5.14251	AAACGAGT	234015
AAACGATA	6733	6793	13526	7.01211e-06		AAACGATA	6128	6086	12214	3.85397e-05	5.49617	AAACGATA	94	36	130	3.45928e-05	4.9333	AAACGATA	149316	149360	298676	3.10239e-05	4.42433	AAACGATA	64009	63697	127706	4.16899e-05	5.94541	AAACGATA	84349	84211	168560	2.22148e-05	3.16806	AAACGATA	9676	9519	19195	2.27993e-05	3.25141	AAACGATA	794074	795557	1589631	4.5269e-05	6.45583	AAACGATA	322289
AAACGATC	4500	4547	9047	4.69012e-06		AAACGATC	4000	4040	8040	2.53692e-05	5.40908	AAACGATC	33	98	131	3.48589e-05	7.43242	AAACGATC	141327	141345	282672	2.93615e-05	6.26029	AAACGATC	50819	51066	101885	3.32606e-05	7.09163	AAACGATC	86654	87104	173758	2.28998e-05	4.88256	AAACGATC	9809	9917	19726	2.343e-05	4.9956	AAACGATC	571459	572662	1144121	3.25819e-05	6.94692	AAACGATC	235822
AAACGATG	8237	8435	16672	8.64305e-06		AAACGATG	5840	4957	10797	3.40686e-05	3.94173	AAACGATG	85	75	160	4.25758e-05	4.92601	AAACGATG	153891	153373	307264	3.19159e-05	3.69267	AAACGATG	59735	60365	120100	3.92069e-05	4.53623	AAACGATG	103876	104288	208164	2.74342e-05	3.17414	AAACGATG	11752	11633	23385	2.7776e-05	3.21368	AAACGATG	736362	734312	1470674	4.18813e-05	4.84567	AAACGATG	332502
AAACGATT	7854	7967	15821	8.20188e-06		AAACGATT	7236	6256	13492	4.25723e-05	5.19056	AAACGATT	126	73	199	5.29536e-05	6.45628	AAACGATT	186960	189315	376275	3.90842e-05	4.76527	AAACGATT	81285	82950	164235	5.36149e-05	6.5369	AAACGATT	82817	82547	165364	2.17935e-05	2.65714	AAACGATT	8922	8696	17618	2.09261e-05	2.55138	AAACGATT	1015782	1015978	2031760	5.78598e-05	7.05445	AAACGATT	394169
AAACGCAA	7695	7942	15637	8.10649e-06		AAACGCAA	6337	5516	11853	3.74007e-05	4.61367	AAACGCAA	62	32	94	2.50133e-05	3.08559	AAACGCAA	154371	154676	309047	3.21011e-05	3.95993	AAACGCAA	62292	62516	124808	4.07438e-05	5.02608	AAACGCAA	112214	111809	224023	2.95243e-05	3.64206	AAACGCAA	12545	12412	24957	2.96432e-05	3.65672	AAACGCAA	715818	717068	1432886	4.08052e-05	5.03365	AAACGCAA	279445
AAACGCAC	5345	5398	10743	5.56936e-06		AAACGCAC	3386	3151	6537	2.06267e-05	3.7036	AAACGCAC	50	56	106	2.82065e-05	5.06458	AAACGCAC	111172	107506	218678	2.27144e-05	4.07846	AAACGCAC	43390	40972	84362	2.75402e-05	4.94495	AAACGCAC	74943	74811	149754	1.97363e-05	3.54373	AAACGCAC	7633	7588	15221	1.80791e-05	3.24617	AAACGCAC	439197	437810	877007	2.49751e-05	4.48438	AAACGCAC	197589
AAACGCAG	9240	9503	18743	9.71669e-06		AAACGCAG	3916	3507	7423	2.34223e-05	2.41053	AAACGCAG	57	34	91	2.4215e-05	2.4921	AAACGCAG	134684	133409	268093	2.78472e-05	2.86591	AAACGCAG	50229	49007	99236	3.23958e-05	3.33404	AAACGCAG	89781	89917	179698	2.36826e-05	2.43732	AAACGCAG	10143	10166	20309	2.41224e-05	2.48258	AAACGCAG	433121	430640	863761	2.45979e-05	2.53151	AAACGCAG	183795
AAACGCAT	6769	6788	13557	7.02818e-06		AAACGCAT	4800	4642	9442	2.9793e-05	4.23908	AAACGCAT	28	48	76	2.02235e-05	2.87749	AAACGCAT	163412	162563	325975	3.38594e-05	4.81767	AAACGCAT	70076	69261	139337	4.54869e-05	6.47207	AAACGCAT	83442	83869	167311	2.20501e-05	3.13739	AAACGCAT	9344	9601	18945	2.25023e-05	3.20173	AAACGCAT	687917	691468	1379385	3.92816e-05	5.58916	AAACGCAT	328184
AAACGCCA	6867	6958	13825	7.16712e-06		AAACGCCA	4591	4685	9276	2.92693e-05	4.08383	AAACGCCA	64	38	102	2.71421e-05	3.78703	AAACGCCA	192837	194565	387402	4.02399e-05	5.61452	AAACGCCA	76852	78363	155215	5.06703e-05	7.06983	AAACGCCA	122750	122919	245669	3.23771e-05	4.51744	AAACGCCA	13791	13917	27708	3.29107e-05	4.59191	AAACGCCA	477021	474829	951850	2.71065e-05	3.78206	AAACGCCA	196038
AAACGCCC	4568	4598	9166	4.75181e-06		AAACGCCC	2721	3069	5790	1.82696e-05	3.84477	AAACGCCC	45	50	95	2.52794e-05	5.31994	AAACGCCC	145830	145850	291680	3.02972e-05	6.37592	AAACGCCC	54048	53783	107831	3.52017e-05	7.40805	AAACGCCC	82151	82459	164610	2.16942e-05	4.56545	AAACGCCC	9531	9533	19064	2.26437e-05	4.76527	AAACGCCC	229729	229356	459085	1.30737e-05	2.7513	AAACGCCC	91821
AAACGCCG	1393	1333	2726	1.41321e-06		AAACGCCG	4106	3996	8102	2.55648e-05	18.09	AAACGCCG	57	44	101	2.6876e-05	19.0177	AAACGCCG	205894	205127	411021	4.26933e-05	30.2103	AAACGCCG	73206	73052	146258	4.77462e-05	33.7858	AAACGCCG	93754	93658	187412	2.46993e-05	17.4775	AAACGCCG	10285	10332	20617	2.44883e-05	17.3282	AAACGCCG	255410	254882	510292	1.45319e-05	10.283	AAACGCCG	104112
AAACGCCT	5956	5891	11847	6.14169e-06		AAACGCCT	3351	3806	7157	2.2583e-05	3.677	AAACGCCT	38	48	86	2.28845e-05	3.72609	AAACGCCT	155374	155553	310927	3.22964e-05	5.25855	AAACGCCT	59601	59129	118730	3.87597e-05	6.31091	AAACGCCT	92759	93041	185800	2.44868e-05	3.98699	AAACGCCT	10445	10490	20935	2.4866e-05	4.04872	AAACGCCT	399820	398822	798642	2.27434e-05	3.70313	AAACGCCT	165283
AAACGCGA	936	957	1893	9.81364e-07		AAACGCGA	3428	3036	6464	2.03963e-05	20.7837	AAACGCGA	41	75	116	3.08674e-05	31.4536	AAACGCGA	112656	111364	224020	2.32692e-05	23.7111	AAACGCGA	41829	40367	82196	2.68331e-05	27.3426	AAACGCGA	74675	74852	149527	1.97064e-05	20.0806	AAACGCGA	7820	7908	15728	1.86813e-05	19.036	AAACGCGA	378997	378290	757287	2.15658e-05	21.9753	AAACGCGA	146800
AAACGCGC	1015	987	2002	1.03787e-06		AAACGCGC	3251	3020	6271	1.97874e-05	19.0653	AAACGCGC	42	57	99	2.63438e-05	25.3825	AAACGCGC	168111	167807	335918	3.48922e-05	33.619	AAACGCGC	66999	66019	133018	4.3424e-05	41.8395	AAACGCGC	66575	66812	133387	1.75793e-05	16.9378	AAACGCGC	6660	6710	13370	1.58805e-05	15.301	AAACGCGC	297169	297265	594434	1.69281e-05	16.3104	AAACGCGC	121829
AAACGCGG	1414	1352	2766	1.43394e-06		AAACGCGG	2808	2779	5587	1.76291e-05	12.2941	AAACGCGG	59	45	104	2.76743e-05	19.2994	AAACGCGG	124125	124211	248336	2.5795e-05	17.9889	AAACGCGG	44168	44172	88340	2.88388e-05	20.1115	AAACGCGG	59974	60254	120228	1.5845e-05	11.05	AAACGCGG	6566	6661	13227	1.57106e-05	10.9563	AAACGCGG	216404	215748	432152	1.23067e-05	8.58241	AAACGCGG	86451
AAACGCGT	1070	1123	2193	1.13689e-06		AAACGCGT	2723	2626	5349	1.68781e-05	14.8459	AAACGCGT	68	31	99	2.63438e-05	23.1718	AAACGCGT	96398	96970	193368	2.00854e-05	17.667	AAACGCGT	39887	40799	80686	2.63401e-05	23.1686	AAACGCGT	60839	60477	121316	1.59884e-05	14.0633	AAACGCGT	5781	5966	11747	1.39527e-05	12.2727	AAACGCGT	338495	338301	676796	1.92736e-05	16.9529	AAACGCGT	144257
AAACGCTA	5453	5436	10889	5.64504e-06		AAACGCTA	3642	2902	6544	2.06488e-05	3.65786	AAACGCTA	39	41	80	2.12879e-05	3.77108	AAACGCTA	103687	105024	208711	2.16791e-05	3.84037	AAACGCTA	47376	48386	95762	3.12617e-05	5.5379	AAACGCTA	53576	53688	107264	1.41365e-05	2.50423	AAACGCTA	5473	5533	11006	1.30726e-05	2.31577	AAACGCTA	422257	421560	843817	2.40299e-05	4.25682	AAACGCTA	180067
AAACGCTC	5106	5023	10129	5.25105e-06		AAACGCTC	3630	3878	7508	2.36906e-05	4.51159	AAACGCTC	42	37	79	2.10218e-05	4.00335	AAACGCTC	157226	156470	313696	3.2584e-05	6.20524	AAACGCTC	62387	61306	123693	4.03798e-05	7.68987	AAACGCTC	82531	82799	165330	2.17891e-05	4.14947	AAACGCTC	8869	9015	17884	2.12421e-05	4.04531	AAACGCTC	390800	389457	780257	2.22199e-05	4.23152	AAACGCTC	169625
AAACGCTG	9227	9354	18581	9.63271e-06		AAACGCTG	4660	4192	8852	2.79314e-05	2.89964	AAACGCTG	54	32	86	2.28845e-05	2.37571	AAACGCTG	211227	212601	423828	4.40236e-05	4.57022	AAACGCTG	83513	84297	167810	5.47819e-05	5.68708	AAACGCTG	84812	84194	169006	2.22735e-05	2.31228	AAACGCTG	9417	9277	18694	2.22042e-05	2.30508	AAACGCTG	473638	474928	948566	2.70129e-05	2.80429	AAACGCTG	208064
AAACGCTT	7775	7798	15573	8.07331e-06		AAACGCTT	5165	5815	10980	3.4646e-05	4.29143	AAACGCTT	47	54	101	2.6876e-05	3.32899	AAACGCTT	206180	206283	412463	4.28431e-05	5.30675	AAACGCTT	91247	91901	183148	5.97891e-05	7.40577	AAACGCTT	82102	82267	164369	2.16624e-05	2.68321	AAACGCTT	8783	8870	17653	2.09677e-05	2.59716	AAACGCTT	654999	654946	1309945	3.73042e-05	4.62068	AAACGCTT	277866
AAACGGAA	11281	10974	22255	1.15374e-05		AAACGGAA	5727	4643	10370	3.27212e-05	2.83611	AAACGGAA	85	46	131	3.48589e-05	3.02139	AAACGGAA	166636	164783	331419	3.44249e-05	2.98377	AAACGGAA	63358	62355	125713	4.10393e-05	3.55707	AAACGGAA	103727	103083	206810	2.72558e-05	2.36239	AAACGGAA	12502	12181	24683	2.93177e-05	2.54111	AAACGGAA	906637	902219	1808856	5.1512e-05	4.46479	AAACGGAA	368066
AAACGGAC	4606	4636	9242	4.79121e-06		AAACGGAC	2792	2789	5581	1.76101e-05	3.67551	AAACGGAC	35	65	100	2.66099e-05	5.55389	AAACGGAC	80020	78859	158879	1.6503e-05	3.44442	AAACGGAC	27436	26563	53999	1.76281e-05	3.67926	AAACGGAC	70487	70331	140818	1.85586e-05	3.87347	AAACGGAC	8424	8496	16920	2.00971e-05	4.19457	AAACGGAC	377902	378408	756310	2.15379e-05	4.4953	AAACGGAC	159178
AAACGGAG	8603	8499	17102	8.86597e-06		AAACGGAG	3618	2693	6311	1.99136e-05	2.24607	AAACGGAG	52	48	100	2.66099e-05	3.00135	AAACGGAG	81961	80738	162699	1.68998e-05	1.90614	AAACGGAG	27969	27496	55465	1.81067e-05	2.04227	AAACGGAG	82964	83699	166663	2.19647e-05	2.47742	AAACGGAG	10334	10538	20872	2.47911e-05	2.79621	AAACGGAG	430194	429987	860181	2.44959e-05	2.76292	AAACGGAG	176408
AAACGGAT	5929	5732	11661	6.04526e-06		AAACGGAT	4558	4207	8765	2.76569e-05	4.57496	AAACGGAT	73	36	109	2.90048e-05	4.79793	AAACGGAT	145633	145131	290764	3.0202e-05	4.99598	AAACGGAT	55010	55025	110035	3.59212e-05	5.94204	AAACGGAT	77774	78092	155866	2.05418e-05	3.398	AAACGGAT	9235	9333	18568	2.20545e-05	3.64823	AAACGGAT	576574	571157	1147731	3.26847e-05	5.40666	AAACGGAT	239938
AAACGGCA	7311	7453	14764	7.65391e-06		AAACGGCA	4238	3947	8185	2.58267e-05	3.37432	AAACGGCA	57	30	87	2.31506e-05	3.02467	AAACGGCA	191894	191477	383371	3.98212e-05	5.20273	AAACGGCA	70312	70147	140459	4.58531e-05	5.99081	AAACGGCA	101974	101790	203764	2.68543e-05	3.50858	AAACGGCA	11481	11313	22794	2.7074e-05	3.53728	AAACGGCA	493347	493395	986742	2.81001e-05	3.67134	AAACGGCA	199802
AAACGGCC	4666	4758	9424	4.88556e-06		AAACGGCC	2444	2696	5140	1.62186e-05	3.3197	AAACGGCC	35	42	77	2.04896e-05	4.19391	AAACGGCC	128901	128507	257408	2.67373e-05	5.47272	AAACGGCC	37515	36228	73743	2.40736e-05	4.92749	AAACGGCC	87011	86523	173534	2.28703e-05	4.6812	AAACGGCC	10646	10454	21100	2.5062e-05	5.1298	AAACGGCC	377936	379453	757389	2.15687e-05	4.41477	AAACGGCC	148069
AAACGGCG	1136	1136	2272	1.17784e-06		AAACGGCG	3949	3563	7512	2.37032e-05	20.1242	AAACGGCG	40	33	73	1.94252e-05	16.4922	AAACGGCG	213991	212156	426147	4.42644e-05	37.5809	AAACGGCG	78374	77306	155680	5.08221e-05	43.1484	AAACGGCG	90244	90462	180706	2.38155e-05	20.2196	AAACGGCG	10138	10191	20329	2.41462e-05	20.5003	AAACGGCG	316135	313921	630056	1.79425e-05	15.2334	AAACGGCG	119437
AAACGGCT	5375	5454	10829	5.61394e-06		AAACGGCT	3204	3291	6495	2.04942e-05	3.65058	AAACGGCT	30	38	68	1.80947e-05	3.22317	AAACGGCT	159470	160168	319638	3.32012e-05	5.91407	AAACGGCT	57868	57572	115440	3.76856e-05	6.71287	AAACGGCT	79569	79554	159123	2.0971e-05	3.73553	AAACGGCT	9216	9143	18359	2.18063e-05	3.88431	AAACGGCT	426955	426877	853832	2.43151e-05	4.33121	AAACGGCT	180548
AAACGGGA	8253	8073	16326	8.46368e-06		AAACGGGA	3073	2576	5649	1.78247e-05	2.10602	AAACGGGA	43	30	73	1.94252e-05	2.29513	AAACGGGA	102205	101449	203654	2.11538e-05	2.49936	AAACGGGA	33924	33900	67824	2.21413e-05	2.61604	AAACGGGA	77631	77467	155098	2.04406e-05	2.41509	AAACGGGA	9835	9941	19776	2.34894e-05	2.77531	AAACGGGA	422005	421300	843305	2.40153e-05	2.83746	AAACGGGA	183982
AAACGGGC	4880	4879	9759	5.05923e-06		AAACGGGC	2657	2751	5408	1.70643e-05	3.3729	AAACGGGC	25	33	58	1.54337e-05	3.0506	AAACGGGC	127827	127645	255472	2.65362e-05	5.2451	AAACGGGC	42957	41752	84709	2.76534e-05	5.46593	AAACGGGC	71253	70963	142216	1.87428e-05	3.70468	AAACGGGC	8404	8276	16680	1.9812e-05	3.91601	AAACGGGC	245425	246315	491740	1.40036e-05	2.76793	AAACGGGC	98757
AAACGGGG	7016	7062	14078	7.29828e-06		AAACGGGG	2249	2061	4310	1.35997e-05	1.86341	AAACGGGG	35	41	76	2.02235e-05	2.771	AAACGGGG	76383	76783	153166	1.59096e-05	2.17991	AAACGGGG	22214	22478	44692	1.45898e-05	1.99907	AAACGGGG	60614	60909	121523	1.60157e-05	2.19445	AAACGGGG	7753	7876	15629	1.85637e-05	2.54357	AAACGGGG	255608	256794	512402	1.4592e-05	1.99938	AAACGGGG	95558
AAACGGGT	4757	4637	9394	4.87001e-06		AAACGGGT	2978	3178	6156	1.94245e-05	3.98859	AAACGGGT	33	67	100	2.66099e-05	5.46403	AAACGGGT	106030	106419	212449	2.20674e-05	4.53127	AAACGGGT	35527	35678	71205	2.3245e-05	4.7731	AAACGGGT	60578	60381	120959	1.59414e-05	3.27337	AAACGGGT	7109	7367	14476	1.71942e-05	3.53062	AAACGGGT	321834	322256	644090	1.83422e-05	3.76635	AAACGGGT	141994
AAACGGTA	5450	5421	10871	5.63571e-06		AAACGGTA	4486	3979	8465	2.67102e-05	4.73946	AAACGGTA	52	29	81	2.1554e-05	3.82454	AAACGGTA	122472	124422	246894	2.56452e-05	4.55048	AAACGGTA	48125	49676	97801	3.19273e-05	5.66518	AAACGGTA	62758	62861	125619	1.65555e-05	2.93761	AAACGGTA	6964	7061	14025	1.66585e-05	2.95588	AAACGGTA	467566	464305	931871	2.65375e-05	4.70881	AAACGGTA	197345
AAACGGTC	3856	3803	7659	3.97056e-06		AAACGGTC	3347	3410	6757	2.13209e-05	5.36974	AAACGGTC	40	45	85	2.26184e-05	5.69653	AAACGGTC	113838	114326	228164	2.36997e-05	5.96886	AAACGGTC	39321	39655	78976	2.57819e-05	6.49327	AAACGGTC	72673	72964	145637	1.91937e-05	4.83401	AAACGGTC	8444	8384	16828	1.99878e-05	5.034	AAACGGTC	378014	377570	755584	2.15173e-05	5.4192	AAACGGTC	160973
AAACGGTG	6632	6909	13541	7.01989e-06		AAACGGTG	4527	3607	8134	2.56658e-05	3.65616	AAACGGTG	51	77	128	3.40606e-05	4.85202	AAACGGTG	144064	146072	290136	3.01368e-05	4.29306	AAACGGTG	52648	54115	106763	3.4853e-05	4.9649	AAACGGTG	76566	76458	153024	2.01672e-05	2.87287	AAACGGTG	8832	8757	17589	2.08917e-05	2.97607	AAACGGTG	449750	448144	897894	2.55699e-05	3.6425	AAACGGTG	202141
AAACGGTT	5715	5796	11511	5.9675e-06		AAACGGTT	5200	4778	9978	3.14843e-05	5.27597	AAACGGTT	39	50	89	2.36828e-05	3.96863	AAACGGTT	151488	153703	305191	3.17006e-05	5.31221	AAACGGTT	58232	59714	117946	3.85037e-05	6.45224	AAACGGTT	68240	68617	136857	1.80366e-05	3.02247	AAACGGTT	8134	8214	16348	1.94177e-05	3.2539	AAACGGTT	609329	609792	1219121	3.47177e-05	5.8178	AAACGGTT	259301
AAACGTAA	11351	11453	22804	1.1822e-05		AAACGTAA	6167	5651	11818	3.72902e-05	3.15431	AAACGTAA	68	16	84	2.23523e-05	1.89074	AAACGTAA	113349	116021	229370	2.3825e-05	2.01531	AAACGTAA	49608	51989	101597	3.31666e-05	2.8055	AAACGTAA	59844	59727	119571	1.57584e-05	1.33298	AAACGTAA	6054	6103	12157	1.44397e-05	1.22143	AAACGTAA	689102	688059	1377161	3.92183e-05	3.31741	AAACGTAA	265610
AAACGTAC	5561	5583	11144	5.77724e-06		AAACGTAC	3545	3364	6909	2.18005e-05	3.77351	AAACGTAC	41	36	77	2.04896e-05	3.54661	AAACGTAC	70032	69439	139471	1.4487e-05	2.5076	AAACGTAC	30718	29972	60690	1.98124e-05	3.42939	AAACGTAC	69353	68998	138351	1.82335e-05	3.15609	AAACGTAC	7570	7514	15084	1.79163e-05	3.10119	AAACGTAC	402313	401221	803534	2.28828e-05	3.96085	AAACGTAC	177696
AAACGTAG	7118	7096	14214	7.36878e-06		AAACGTAG	3165	3159	6324	1.99546e-05	2.70799	AAACGTAG	44	85	129	3.43267e-05	4.6584	AAACGTAG	55618	55460	111078	1.15378e-05	1.56577	AAACGTAG	21463	21238	42701	1.39398e-05	1.89174	AAACGTAG	50645	50250	100895	1.32971e-05	1.80452	AAACGTAG	5350	5141	10491	1.24609e-05	1.69104	AAACGTAG	371736	370547	742283	2.11385e-05	2.86865	AAACGTAG	162300
AAACGTAT	10809	11081	21890	1.13482e-05		AAACGTAT	6278	5469	11747	3.70662e-05	3.26628	AAACGTAT	89	50	139	3.69877e-05	3.25936	AAACGTAT	114353	113455	227808	2.36627e-05	2.08516	AAACGTAT	50581	49814	100395	3.27742e-05	2.88806	AAACGTAT	63693	65112	128805	1.69754e-05	1.49587	AAACGTAT	7105	7222	14327	1.70172e-05	1.49956	AAACGTAT	596945	596815	1193760	3.39955e-05	2.99568	AAACGTAT	241635
AAACGTCA	9292	9351	18643	9.66485e-06		AAACGTCA	4359	4272	8631	2.7234e-05	2.81784	AAACGTCA	51	32	83	2.20862e-05	2.28521	AAACGTCA	108687	109189	217876	2.26311e-05	2.34158	AAACGTCA	42825	43304	86129	2.8117e-05	2.9092	AAACGTCA	95610	94855	190465	2.51016e-05	2.59721	AAACGTCA	10387	10326	20713	2.46023e-05	2.54554	AAACGTCA	709229	706568	1415797	4.03186e-05	4.17167	AAACGTCA	276776
AAACGTCC	6125	6050	12175	6.31173e-06		AAACGTCC	2813	3024	5837	1.84179e-05	2.91805	AAACGTCC	39	33	72	1.91591e-05	3.03548	AAACGTCC	84873	83066	167939	1.7444e-05	2.76375	AAACGTCC	32560	30178	62738	2.0481e-05	3.2449	AAACGTCC	70536	70408	140944	1.85752e-05	2.94297	AAACGTCC	7682	7755	15437	1.83356e-05	2.90501	AAACGTCC	352986	350755	703741	2.00409e-05	3.17518	AAACGTCC	146287
AAACGTCG	1101	1096	2197	1.13896e-06		AAACGTCG	3526	3566	7092	2.23779e-05	19.6476	AAACGTCG	41	54	95	2.52794e-05	22.1951	AAACGTCG	95582	95354	190936	1.98328e-05	17.413	AAACGTCG	35198	35422	70620	2.30541e-05	20.2413	AAACGTCG	81575	81329	162904	2.14693e-05	18.8499	AAACGTCG	8412	8317	16729	1.98702e-05	17.4459	AAACGTCG	394535	394698	789233	2.24755e-05	19.7333	AAACGTCG	154975
AAACGTCT	9259	9088	18347	9.5114e-06		AAACGTCT	3974	4333	8307	2.62117e-05	2.75582	AAACGTCT	45	41	86	2.28845e-05	2.40601	AAACGTCT	90312	90067	180379	1.87362e-05	1.96987	AAACGTCT	36143	35788	71931	2.3482e-05	2.46883	AAACGTCT	83761	83625	167386	2.206e-05	2.31933	AAACGTCT	8804	8811	17615	2.09226e-05	2.19974	AAACGTCT	532718	531791	1064509	3.03147e-05	3.1872	AAACGTCT	215951
AAACGTGA	11738	11608	23346	1.2103e-05		AAACGTGA	4557	3991	8548	2.69721e-05	2.22856	AAACGTGA	48	43	91	2.4215e-05	2.00075	AAACGTGA	95958	97038	192996	2.00467e-05	1.65635	AAACGTGA	40346	40904	81250	2.65242e-05	2.19155	AAACGTGA	74347	75423	149770	1.97384e-05	1.63087	AAACGTGA	7684	7884	15568	1.84912e-05	1.52782	AAACGTGA	617396	616849	1234245	3.51484e-05	2.90411	AAACGTGA	263858
AAACGTGC	7227	7402	14629	7.58392e-06		AAACGTGC	3831	3666	7497	2.36558e-05	3.11921	AAACGTGC	34	56	90	2.39489e-05	3.15785	AAACGTGC	95938	95346	191284	1.98689e-05	2.61987	AAACGTGC	37926	37546	75472	2.4638e-05	3.24871	AAACGTGC	69212	69702	138914	1.83077e-05	2.41401	AAACGTGC	6904	6890	13794	1.63841e-05	2.16037	AAACGTGC	398631	398994	797625	2.27145e-05	2.99508	AAACGTGC	174799
AAACGTGG	11357	11210	22567	1.16991e-05		AAACGTGG	4060	3553	7613	2.40219e-05	2.05331	AAACGTGG	60	80	140	3.72538e-05	3.18433	AAACGTGG	87601	86875	174476	1.8123e-05	1.54909	AAACGTGG	34534	33929	68463	2.23499e-05	1.91039	AAACGTGG	75094	74773	149867	1.97512e-05	1.68826	AAACGTGG	8090	8163	16253	1.93048e-05	1.65011	AAACGTGG	413927	413892	827819	2.35743e-05	2.01505	AAACGTGG	190326
AAACGTGT	11789	11722	23511	1.21885e-05		AAACGTGT	4770	4489	9259	2.92156e-05	2.39698	AAACGTGT	58	68	126	3.35284e-05	2.75082	AAACGTGT	74184	73475	147659	1.53375e-05	1.25836	AAACGTGT	31414	30876	62290	2.03347e-05	1.66835	AAACGTGT	63266	63423	126689	1.66965e-05	1.36986	AAACGTGT	6296	6221	12517	1.48673e-05	1.21978	AAACGTGT	544584	544242	1088826	3.10072e-05	2.54397	AAACGTGT	228659
AAACGTTA	10050	10293	20343	1.05462e-05		AAACGTTA	5326	4683	10009	3.15821e-05	2.99466	AAACGTTA	59	51	110	2.92708e-05	2.7755	AAACGTTA	108906	109332	218238	2.26687e-05	2.14947	AAACGTTA	50596	50437	101033	3.29824e-05	3.12744	AAACGTTA	48628	48754	97382	1.28341e-05	1.21695	AAACGTTA	4981	4998	9979	1.18528e-05	1.12389	AAACGTTA	639029	640749	1279778	3.64451e-05	3.45577	AAACGTTA	259536
AAACGTTC	8154	8257	16411	8.50774e-06		AAACGTTC	5254	5533	10787	3.4037e-05	4.00071	AAACGTTC	51	57	108	2.87387e-05	3.37794	AAACGTTC	126561	124893	251454	2.61189e-05	3.07001	AAACGTTC	53491	51478	104969	3.42674e-05	4.02778	AAACGTTC	70052	70331	140383	1.85013e-05	2.17464	AAACGTTC	7226	7208	14434	1.71443e-05	2.01514	AAACGTTC	648639	648610	1297249	3.69426e-05	4.34223	AAACGTTC	283609
AAACGTTG	8137	8076	16213	8.4051e-06		AAACGTTG	5320	5081	10401	3.28191e-05	3.90466	AAACGTTG	50	113	163	4.33741e-05	5.16045	AAACGTTG	121911	122590	244501	2.53966e-05	3.02158	AAACGTTG	49878	50361	100239	3.27232e-05	3.89326	AAACGTTG	80645	80829	161474	2.12809e-05	2.5319	AAACGTTG	8401	8540	16941	2.0122e-05	2.39403	AAACGTTG	661149	661972	1323121	3.76794e-05	4.48292	AAACGTTG	287961
AAACGTTT	16947	16947	33894	1.75712e-05		AAACGTTT	8513	8513	17026	5.37234e-05	3.05746	AAACGTTT	113	50	163	4.33741e-05	2.46847	AAACGTTT	183263	183263	366526	3.80715e-05	2.1667	AAACGTTT	82269	82269	164538	5.37138e-05	3.05692	AAACGTTT	75033	75033	150066	1.97774e-05	1.12556	AAACGTTT	7664	7664	15328	1.82061e-05	1.03613	AAACGTTT	1311799	1311799	2623598	7.47139e-05	4.25206	AAACGTTT	546827
AACCGAAA	6446	6388	12834	6.65337e-06		AACCGAAA	4957	4542	9499	2.99729e-05	4.50492	AACCGAAA	52	25	77	2.04896e-05	3.07958	AACCGAAA	132580	132888	265468	2.75745e-05	4.14444	AACCGAAA	47647	48042	95689	3.12379e-05	4.69505	AACCGAAA	94055	94451	188506	2.48435e-05	3.73397	AACCGAAA	10637	10843	21480	2.55133e-05	3.83465	AACCGAAA	849374	846850	1696224	4.83045e-05	7.26016	AACCGAAA	323883
AACCGAAC	2872	2895	5767	2.98971e-06		AACCGAAC	3356	3404	6760	2.13303e-05	7.13458	AACCGAAC	18	24	42	1.11761e-05	3.7382	AACCGAAC	97516	97948	195464	2.03031e-05	6.79099	AACCGAAC	32576	32469	65045	2.12341e-05	7.10238	AACCGAAC	71837	71220	143057	1.88537e-05	6.30619	AACCGAAC	8273	8211	16484	1.95792e-05	6.54886	AACCGAAC	396284	394452	790736	2.25183e-05	7.53193	AACCGAAC	169706
AACCGAAG	5387	5421	10808	5.60305e-06		AACCGAAG	4231	3936	8167	2.57699e-05	4.59927	AACCGAAG	16	32	48	1.27727e-05	2.2796	AACCGAAG	119152	118318	237470	2.46663e-05	4.4023	AACCGAAG	38072	38225	76297	2.49073e-05	4.44531	AACCGAAG	89454	89407	178861	2.35723e-05	4.20705	AACCGAAG	10566	10259	20825	2.47353e-05	4.41462	AACCGAAG	436030	437111	873141	2.4865e-05	4.43776	AACCGAAG	186702
AACCGAAT	4670	4576	9246	4.79328e-06		AACCGAAT	3602	3561	7163	2.26019e-05	4.71534	AACCGAAT	34	24	58	1.54337e-05	3.21986	AACCGAAT	95595	96041	191636	1.99055e-05	4.15278	AACCGAAT	34536	34580	69116	2.25631e-05	4.70722	AACCGAAT	72270	71968	144238	1.90093e-05	3.96582	AACCGAAT	8202	8244	16446	1.95341e-05	4.0753	AACCGAAT	578206	577699	1155905	3.29175e-05	6.86741	AACCGAAT	239787
AACCGACA	3354	3497	6851	3.55168e-06		AACCGACA	3351	3527	6878	2.17027e-05	6.11054	AACCGACA	34	24	58	1.54337e-05	4.34548	AACCGACA	102941	101465	204406	2.12319e-05	5.978	AACCGACA	35928	34944	70872	2.31363e-05	6.5142	AACCGACA	85048	85870	170918	2.25255e-05	6.34222	AACCGACA	9883	9917	19800	2.35179e-05	6.62162	AACCGACA	390683	389960	780643	2.22309e-05	6.25926	AACCGACA	145976
AACCGACC	2244	2280	4524	2.34532e-06		AACCGACC	2857	2957	5814	1.83453e-05	7.82211	AACCGACC	21	21	42	1.11761e-05	4.7653	AACCGACC	99460	99880	199340	2.07057e-05	8.82852	AACCGACC	29463	29694	59157	1.93119e-05	8.23424	AACCGACC	73912	74239	148151	1.9525e-05	8.3251	AACCGACC	8327	8489	16816	1.99735e-05	8.51635	AACCGACC	281475	281287	562762	1.60261e-05	6.83325	AACCGACC	118296
AACCGACG	689	733	1422	7.37189e-07		AACCGACG	3064	3130	6194	1.95444e-05	26.512	AACCGACG	21	14	35	9.31345e-06	12.6337	AACCGACG	108606	108341	216947	2.25346e-05	30.5682	AACCGACG	34244	34495	68739	2.244e-05	30.4399	AACCGACG	71867	71770	143637	1.89301e-05	25.6788	AACCGACG	7912	7955	15867	1.88464e-05	25.5652	AACCGACG	222933	222578	445511	1.26871e-05	17.2101	AACCGACG	90058
AACCGACT	3005	2855	5860	3.03792e-06		AACCGACT	2646	2457	5103	1.61019e-05	5.30029	AACCGACT	11	16	27	7.18466e-06	2.36499	AACCGACT	74456	73129	147585	1.53298e-05	5.04616	AACCGACT	26033	24918	50951	1.66331e-05	5.47514	AACCGACT	70739	70340	141079	1.8593e-05	6.12029	AACCGACT	8044	7996	16040	1.90518e-05	6.27133	AACCGACT	343398	343696	687094	1.95668e-05	6.44085	AACCGACT	146746
AACCGAGA	5564	5743	11307	5.86174e-06		AACCGAGA	2945	2827	5772	1.82128e-05	3.10707	AACCGAGA	21	26	47	1.25066e-05	2.1336	AACCGAGA	73487	73232	146719	1.52399e-05	2.59989	AACCGAGA	22754	22558	45312	1.47922e-05	2.52352	AACCGAGA	90928	91273	182201	2.40125e-05	4.09648	AACCGAGA	10077	10595	20672	2.45536e-05	4.18879	AACCGAGA	344385	343849	688234	1.95993e-05	3.34359	AACCGAGA	132115
AACCGAGC	3335	3463	6798	3.5242e-06		AACCGAGC	2431	2336	4767	1.50417e-05	4.26811	AACCGAGC	18	19	37	9.84565e-06	2.79373	AACCGAGC	98788	98261	197049	2.04677e-05	5.80777	AACCGAGC	31215	30991	62206	2.03073e-05	5.76224	AACCGAGC	79032	79506	158538	2.08939e-05	5.9287	AACCGAGC	8450	8583	17033	2.02313e-05	5.74068	AACCGAGC	222818	222485	445303	1.26812e-05	3.59832	AACCGAGC	94404
AACCGAGG	6453	6260	12713	6.59064e-06		AACCGAGG	2715	2480	5195	1.63922e-05	2.48719	AACCGAGG	33	33	66	1.75625e-05	2.66477	AACCGAGG	74323	73332	147655	1.53371e-05	2.32711	AACCGAGG	20427	19452	39879	1.30186e-05	1.97532	AACCGAGG	76085	75568	151653	1.99866e-05	3.03257	AACCGAGG	8622	8458	17080	2.02871e-05	3.07817	AACCGAGG	218677	218911	437588	1.24615e-05	1.89079	AACCGAGG	93580
AACCGAGT	3956	3892	7848	4.06854e-06		AACCGAGT	2569	2480	5049	1.59315e-05	3.91578	AACCGAGT	28	31	59	1.56998e-05	3.85884	AACCGAGT	59312	61435	120747	1.25421e-05	3.08272	AACCGAGT	19706	21258	40964	1.33728e-05	3.28688	AACCGAGT	69300	69157	138457	1.82474e-05	4.48501	AACCGAGT	7751	7621	15372	1.82584e-05	4.48771	AACCGAGT	290690	290396	581086	1.6548e-05	4.0673	AACCGAGT	120999
AACCGATA	2712	2749	5461	2.83108e-06		AACCGATA	3599	3523	7122	2.24726e-05	7.93782	AACCGATA	51	13	64	1.70303e-05	6.01549	AACCGATA	118751	118429	237180	2.46362e-05	8.70206	AACCGATA	44474	43773	88247	2.88084e-05	10.1758	AACCGATA	60893	60837	121730	1.6043e-05	5.66674	AACCGATA	7442	7398	14840	1.76265e-05	6.22608	AACCGATA	402442	402248	804690	2.29157e-05	8.09434	AACCGATA	165456
AACCGATC	2071	2116	4187	2.17061e-06		AACCGATC	3037	3161	6198	1.9557e-05	9.0099	AACCGATC	17	36	53	1.41032e-05	6.49735	AACCGATC	127009	126245	253254	2.63058e-05	12.1191	AACCGATC	37649	37035	74684	2.43808e-05	11.2322	AACCGATC	74354	74104	148458	1.95655e-05	9.01381	AACCGATC	8891	8752	17643	2.09558e-05	9.65434	AACCGATC	359901	357996	717897	2.0444e-05	9.41855	AACCGATC	160175
AACCGATG	3341	3609	6950	3.603e-06		AACCGATG	4059	3743	7802	2.46182e-05	6.83271	AACCGATG	46	32	78	2.07557e-05	5.76067	AACCGATG	145405	145093	290498	3.01744e-05	8.3748	AACCGATG	48415	47826	96241	3.14181e-05	8.71998	AACCGATG	76357	76265	152622	2.01143e-05	5.58264	AACCGATG	9008	8947	17955	2.13264e-05	5.91907	AACCGATG	395884	397523	793407	2.25944e-05	6.27099	AACCGATG	187270
AACCGATT	3481	3623	7104	3.68284e-06		AACCGATT	3789	3656	7445	2.34918e-05	6.37872	AACCGATT	25	53	78	2.07557e-05	5.63579	AACCGATT	126056	125219	251275	2.61003e-05	7.087	AACCGATT	47432	47474	94906	3.09823e-05	8.41261	AACCGATT	64165	63571	127736	1.68345e-05	4.57107	AACCGATT	7296	7255	14551	1.72832e-05	4.69292	AACCGATT	543577	543837	1087414	3.0967e-05	8.40847	AACCGATT	212306
AACCGCAA	3928	3875	7803	4.04521e-06		AACCGCAA	5000	4160	9160	2.89032e-05	7.14505	AACCGCAA	49	28	77	2.04896e-05	5.06515	AACCGCAA	161710	162442	324152	3.36701e-05	8.32345	AACCGCAA	52356	54251	106607	3.48021e-05	8.60329	AACCGCAA	101146	101681	202827	2.67308e-05	6.60803	AACCGCAA	11522	11571	23093	2.74292e-05	6.78066	AACCGCAA	376772	376845	753617	2.14612e-05	5.30535	AACCGCAA	161780
AACCGCAC	3160	3232	6392	3.31372e-06		AACCGCAC	3700	3423	7123	2.24757e-05	6.78262	AACCGCAC	35	106	141	3.75199e-05	11.3226	AACCGCAC	134614	133066	267680	2.78043e-05	8.39064	AACCGCAC	44857	43793	88650	2.894e-05	8.73338	AACCGCAC	68983	69212	138195	1.82129e-05	5.49621	AACCGCAC	7480	7493	14973	1.77845e-05	5.36692	AACCGCAC	250759	251404	502163	1.43004e-05	4.31552	AACCGCAC	112736
AACCGCAG	6030	5852	11882	6.15983e-06		AACCGCAG	3831	3788	7619	2.40408e-05	3.90283	AACCGCAG	49	50	99	2.63438e-05	4.2767	AACCGCAG	154416	154021	308437	3.20377e-05	5.20107	AACCGCAG	49223	48924	98147	3.20403e-05	5.20149	AACCGCAG	83597	83479	167076	2.20192e-05	3.57464	AACCGCAG	9813	9597	19410	2.30546e-05	3.74274	AACCGCAG	262898	263189	526087	1.49817e-05	2.43216	AACCGCAG	115104
AACCGCAT	3927	3776	7703	3.99337e-06		AACCGCAT	4296	4040	8336	2.63032e-05	6.58672	AACCGCAT	41	42	83	2.20862e-05	5.53072	AACCGCAT	152437	152080	304517	3.16306e-05	7.92078	AACCGCAT	49472	48877	98349	3.21062e-05	8.03989	AACCGCAT	81396	81797	163193	2.15074e-05	5.38579	AACCGCAT	9334	9477	18811	2.23432e-05	5.59507	AACCGCAT	314252	314091	628343	1.78937e-05	4.48086	AACCGCAT	135214
AACCGCCA	3845	4067	7912	4.10172e-06		AACCGCCA	3961	4536	8497	2.68112e-05	6.53658	AACCGCCA	36	38	74	1.96913e-05	4.80075	AACCGCCA	182824	183481	366305	3.80486e-05	9.27626	AACCGCCA	61541	62708	124249	4.05614e-05	9.88887	AACCGCCA	106321	106393	212714	2.80339e-05	6.83467	AACCGCCA	12562	12749	25311	3.00637e-05	7.32953	AACCGCCA	264145	264563	528708	1.50564e-05	3.67075	AACCGCCA	104812
AACCGCCC	3585	3688	7273	3.77045e-06		AACCGCCC	2935	3125	6060	1.91216e-05	5.07143	AACCGCCC	32	55	87	2.31506e-05	6.14001	AACCGCCC	143687	143252	286939	2.98047e-05	7.90482	AACCGCCC	41271	40963	82234	2.68455e-05	7.11997	AACCGCCC	77886	78225	156111	2.05741e-05	5.45667	AACCGCCC	9003	9289	18292	2.17267e-05	5.76237	AACCGCCC	158473	157647	316120	9.00236e-06	2.38761	AACCGCCC	63246
AACCGCCG	1274	1220	2494	1.29293e-06		AACCGCCG	4266	4279	8545	2.69627e-05	20.8539	AACCGCCG	60	29	89	2.36828e-05	18.3171	AACCGCCG	238668	238102	476770	4.95227e-05	38.3026	AACCGCCG	71557	70525	142082	4.6383e-05	35.8743	AACCGCCG	86028	86103	172131	2.26854e-05	17.5457	AACCGCCG	9710	9819	19529	2.3196e-05	17.9406	AACCGCCG	172531	172284	344815	9.81952e-06	7.59477	AACCGCCG	68167
AACCGCCT	3946	4006	7952	4.12245e-06		AACCGCCT	3258	3308	6566	2.07182e-05	5.02569	AACCGCCT	34	42	76	2.02235e-05	4.90569	AACCGCCT	146834	148285	295119	3.06544e-05	7.43596	AACCGCCT	43871	46241	90112	2.94173e-05	7.13586	AACCGCCT	84615	84522	169137	2.22908e-05	5.40717	AACCGCCT	9690	9857	19547	2.32174e-05	5.63193	AACCGCCT	243289	243542	486831	1.38638e-05	3.363	AACCGCCT	102218
AACCGCGA	879	827	1706	8.8442e-07		AACCGCGA	4090	3474	7564	2.38673e-05	26.9863	AACCGCGA	41	33	74	1.96913e-05	22.2647	AACCGCGA	147441	148097	295538	3.06979e-05	34.7097	AACCGCGA	44121	44818	88939	2.90343e-05	32.8287	AACCGCGA	72238	72446	144684	1.90681e-05	21.56	AACCGCGA	7914	7872	15786	1.87501e-05	21.2005	AACCGCGA	218210	217609	435819	1.24111e-05	14.033	AACCGCGA	94846
AACCGCGC	953	981	1934	1.00262e-06		AACCGCGC	3889	3570	7459	2.35359e-05	23.4745	AACCGCGC	37	31	68	1.80947e-05	18.0474	AACCGCGC	199306	199513	398819	4.14258e-05	41.3176	AACCGCGC	61500	61453	122953	4.01383e-05	40.0334	AACCGCGC	64415	64400	128815	1.69767e-05	16.9324	AACCGCGC	6943	6784	13727	1.63045e-05	16.2619	AACCGCGC	157215	157100	314315	8.95095e-06	8.92757	AACCGCGC	65991
AACCGCGG	1306	1458	2764	1.4329e-06		AACCGCGG	2150	2045	4195	1.32368e-05	9.23773	AACCGCGG	76	50	126	3.35284e-05	23.3989	AACCGCGG	110538	111621	222159	2.30759e-05	16.1043	AACCGCGG	31475	32051	63526	2.07382e-05	14.4728	AACCGCGG	56748	56714	113462	1.49533e-05	10.4357	AACCGCGG	6484	6394	12878	1.52961e-05	10.6749	AACCGCGG	134927	134593	269520	7.6753e-06	5.35646	AACCGCGG	59036
AACCGCGT	865	909	1774	9.19672e-07		AACCGCGT	2974	2794	5768	1.82002e-05	19.7899	AACCGCGT	60	41	101	2.6876e-05	29.2234	AACCGCGT	109117	108284	217401	2.25817e-05	24.5541	AACCGCGT	34866	34945	69811	2.279e-05	24.7805	AACCGCGT	52676	52392	105068	1.38471e-05	15.0565	AACCGCGT	5528	5554	11082	1.31629e-05	14.3126	AACCGCGT	172914	172909	345823	9.84823e-06	10.7084	AACCGCGT	74571
AACCGCTA	2532	2365	4897	2.53869e-06		AACCGCTA	2853	2436	5289	1.66888e-05	6.57378	AACCGCTA	25	32	57	1.51676e-05	5.97459	AACCGCTA	94749	95582	190331	1.97699e-05	7.78746	AACCGCTA	33578	34195	67773	2.21246e-05	8.71499	AACCGCTA	46662	46704	93366	1.23048e-05	4.84692	AACCGCTA	5146	5192	10338	1.22792e-05	4.83682	AACCGCTA	249045	248599	497644	1.41717e-05	5.5823	AACCGCTA	103597
AACCGCTC	3169	3128	6297	3.26447e-06		AACCGCTC	3036	3440	6476	2.04342e-05	6.25957	AACCGCTC	19	32	51	1.3571e-05	4.15719	AACCGCTC	145419	144155	289574	3.00784e-05	9.21387	AACCGCTC	41471	41141	82612	2.69689e-05	8.26132	AACCGCTC	79688	80119	159807	2.10612e-05	6.45163	AACCGCTC	8889	8931	17820	2.11661e-05	6.48376	AACCGCTC	246975	248207	495182	1.41016e-05	4.31972	AACCGCTC	109034
AACCGCTG	4765	4842	9607	4.98043e-06		AACCGCTG	3901	3770	7671	2.42049e-05	4.85999	AACCGCTG	35	49	84	2.23523e-05	4.48802	AACCGCTG	199777	199704	399481	4.14946e-05	8.33153	AACCGCTG	66749	66915	133664	4.36349e-05	8.76127	AACCGCTG	80637	80431	161068	2.12274e-05	4.26215	AACCGCTG	9532	9492	19024	2.25961e-05	4.53698	AACCGCTG	293157	292699	585856	1.66838e-05	3.34987	AACCGCTG	135133
AACCGCTT	3638	3898	7536	3.90679e-06		AACCGCTT	4130	4394	8524	2.68964e-05	6.88453	AACCGCTT	26	31	57	1.51676e-05	3.88237	AACCGCTT	180816	180337	361153	3.75134e-05	9.60211	AACCGCTT	63394	62374	125768	4.10572e-05	10.5092	AACCGCTT	79435	79651	159086	2.09662e-05	5.36659	AACCGCTT	8922	9019	17941	2.13098e-05	5.45455	AACCGCTT	360279	360439	720718	2.05244e-05	5.25351	AACCGCTT	155267
AACCGGAA	4973	4986	9959	5.16292e-06		AACCGGAA	4372	4188	8560	2.701e-05	5.23154	AACCGGAA	22	26	48	1.27727e-05	2.47394	AACCGGAA	158285	158892	317177	3.29456e-05	6.3812	AACCGGAA	49474	50496	99970	3.26354e-05	6.32112	AACCGGAA	77998	78365	156363	2.06073e-05	3.99141	AACCGGAA	9399	9698	19097	2.26829e-05	4.39342	AACCGGAA	496716	496624	993340	2.8288e-05	5.47907	AACCGGAA	194800
AACCGGAC	2122	2076	4198	2.17632e-06		AACCGGAC	2891	2588	5479	1.72883e-05	7.94384	AACCGGAC	27	31	58	1.54337e-05	7.09168	AACCGGAC	106501	105252	211753	2.19951e-05	10.1066	AACCGGAC	29703	28879	58582	1.91242e-05	8.78743	AACCGGAC	57377	57522	114899	1.51427e-05	6.95795	AACCGGAC	6756	6753	13509	1.60456e-05	7.37283	AACCGGAC	203247	204189	407436	1.16028e-05	5.33141	AACCGGAC	83405
AACCGGAG	4011	4131	8142	4.22095e-06		AACCGGAG	2912	2784	5696	1.7973e-05	4.25805	AACCGGAG	34	18	52	1.38371e-05	3.2782	AACCGGAG	102766	101959	204725	2.12651e-05	5.03797	AACCGGAG	30305	29075	59380	1.93847e-05	4.5925	AACCGGAG	67396	67582	134978	1.77889e-05	4.21444	AACCGGAG	8396	8350	16746	1.98904e-05	4.7123	AACCGGAG	236705	236317	473022	1.34706e-05	3.19135	AACCGGAG	97598
AACCGGAT	2549	2484	5033	2.60919e-06		AACCGGAT	3569	3440	7009	2.2116e-05	8.47619	AACCGGAT	33	31	64	1.70303e-05	6.52704	AACCGGAT	142192	144406	286598	2.97693e-05	11.4094	AACCGGAT	41918	43530	85448	2.78947e-05	10.6909	AACCGGAT	64788	64054	128842	1.69803e-05	6.50786	AACCGGAT	7993	7939	15932	1.89236e-05	7.25265	AACCGGAT	307542	306886	614428	1.74975e-05	6.70608	AACCGGAT	126706
AACCGGCA	3561	3531	7092	3.67661e-06		AACCGGCA	3214	3490	6704	2.11536e-05	5.75356	AACCGGCA	21	37	58	1.54337e-05	4.19781	AACCGGCA	193527	193546	387073	4.02058e-05	10.9355	AACCGGCA	58772	59052	117824	3.84639e-05	10.4618	AACCGGCA	75834	75885	151719	1.99953e-05	5.4385	AACCGGCA	8785	8670	17455	2.07325e-05	5.63903	AACCGGCA	262866	262107	524973	1.495e-05	4.06624	AACCGGCA	105492
AACCGGCC	3253	3407	6660	3.45266e-06		AACCGGCC	2506	3011	5517	1.74082e-05	5.04197	AACCGGCC	21	35	56	1.49015e-05	4.31596	AACCGGCC	183836	182639	366475	3.80662e-05	11.0252	AACCGGCC	43888	42838	86726	2.83119e-05	8.20003	AACCGGCC	70951	70431	141382	1.86329e-05	5.39669	AACCGGCC	8544	8481	17025	2.02218e-05	5.85688	AACCGGCC	163741	164146	327887	9.33745e-06	2.70442	AACCGGCC	63303
AACCGGCG	944	950	1894	9.81882e-07		AACCGGCG	3691	3943	7634	2.40881e-05	24.5326	AACCGGCG	48	38	86	2.28845e-05	23.3068	AACCGGCG	239486	239754	479240	4.97793e-05	50.6978	AACCGGCG	69167	69693	138860	4.53311e-05	46.1676	AACCGGCG	67274	67874	135148	1.78113e-05	18.14	AACCGGCG	7820	7882	15702	1.86504e-05	18.9945	AACCGGCG	162167	163192	325359	9.26546e-06	9.43643	AACCGGCG	57549
AACCGGCT	3329	3461	6790	3.52005e-06		AACCGGCT	2676	2709	5385	1.69917e-05	4.82711	AACCGGCT	23	27	50	1.33049e-05	3.77975	AACCGGCT	159895	160107	320002	3.3239e-05	9.44276	AACCGGCT	43960	44040	88000	2.87278e-05	8.16118	AACCGGCT	67538	67648	135186	1.78163e-05	5.06139	AACCGGCT	7930	8000	15930	1.89212e-05	5.37526	AACCGGCT	232270	231951	464221	1.32199e-05	3.7556	AACCGGCT	101208
AACCGGGA	4613	4534	9147	4.74196e-06		AACCGGGA	2764	2748	5512	1.73924e-05	3.66777	AACCGGGA	27	23	50	1.33049e-05	2.80579	AACCGGGA	110516	108751	219267	2.27755e-05	4.80298	AACCGGGA	31281	29814	61095	1.99446e-05	4.20598	AACCGGGA	61608	61902	123510	1.62776e-05	3.43266	AACCGGGA	7787	7906	15693	1.86397e-05	3.9308	AACCGGGA	221168	221598	442766	1.26089e-05	2.65901	AACCGGGA	91191
AACCGGGC	3100	3179	6279	3.25514e-06		AACCGGGC	3122	3223	6345	2.00209e-05	6.15053	AACCGGGC	25	36	61	1.6232e-05	4.98658	AACCGGGC	165724	165553	331277	3.44102e-05	10.571	AACCGGGC	45220	45187	90407	2.95136e-05	9.06675	AACCGGGC	58975	58352	117327	1.54627e-05	4.75023	AACCGGGC	6849	6819	13668	1.62344e-05	4.98733	AACCGGGC	128401	128440	256841	7.31423e-06	2.24698	AACCGGGC	50845
AACCGGGG	4110	3992	8102	4.20022e-06		AACCGGGG	2060	2078	4138	1.30569e-05	3.10864	AACCGGGG	34	20	54	1.43693e-05	3.42109	AACCGGGG	94279	93081	187360	1.94613e-05	4.63341	AACCGGGG	24017	23013	47030	1.5353e-05	3.6553	AACCGGGG	53201	52734	105935	1.39613e-05	3.32395	AACCGGGG	6821	6675	13496	1.60302e-05	3.81651	AACCGGGG	118878	119060	237938	6.77592e-06	1.61323	AACCGGGG	48393
AACCGGGT	3017	3098	6115	3.17012e-06		AACCGGGT	2576	2975	5551	1.75155e-05	5.52518	AACCGGGT	19	23	42	1.11761e-05	3.52546	AACCGGGT	113672	111619	225291	2.34013e-05	7.38182	AACCGGGT	32988	31301	64289	2.09873e-05	6.62034	AACCGGGT	49392	49499	98891	1.3033e-05	4.11119	AACCGGGT	5939	6027	11966	1.42129e-05	4.48338	AACCGGGT	188959	189506	378465	1.07778e-05	3.39981	AACCGGGT	83652
AACCGGTA	2208	2109	4317	2.23801e-06		AACCGGTA	2585	2499	5084	1.60419e-05	7.16795	AACCGGTA	34	17	51	1.3571e-05	6.06389	AACCGGTA	110782	110348	221130	2.29691e-05	10.2632	AACCGGTA	39086	38663	77749	2.53813e-05	11.341	AACCGGTA	49953	49349	99302	1.30871e-05	5.84768	AACCGGTA	5644	5679	11323	1.34491e-05	6.00942	AACCGGTA	250338	252009	502347	1.43057e-05	6.39214	AACCGGTA	109923
AACCGGTC	1833	1782	3615	1.87408e-06		AACCGGTC	2360	2445	4805	1.51616e-05	8.09015	AACCGGTC	20	19	39	1.03778e-05	5.53757	AACCGGTC	130231	129659	259890	2.69951e-05	14.4045	AACCGGTC	34261	33960	68221	2.22709e-05	11.8837	AACCGGTC	61751	61805	123556	1.62836e-05	8.68887	AACCGGTC	7133	7224	14357	1.70528e-05	9.09931	AACCGGTC	242078	242321	484399	1.37945e-05	7.36071	AACCGGTC	124772
AACCGGTG	2888	2861	5749	2.98038e-06		AACCGGTG	2807	2631	5438	1.71589e-05	5.75729	AACCGGTG	25	25	50	1.33049e-05	4.46417	AACCGGTG	155013	151872	306885	3.18765e-05	10.6955	AACCGGTG	48318	45092	93410	3.04939e-05	10.2315	AACCGGTG	62481	62495	124976	1.64708e-05	5.52639	AACCGGTG	7199	7268	14467	1.71835e-05	5.76553	AACCGGTG	264017	264494	528511	1.50508e-05	5.04994	AACCGGTG	123548
AACCGGTT	2723	2723	5446	2.8233e-06		AACCGGTT	2791	2791	5582	1.76133e-05	6.23855	AACCGGTT	25	42	67	1.78286e-05	6.31481	AACCGGTT	130815	130815	261630	2.71758e-05	9.62556	AACCGGTT	42826	42826	85652	2.79613e-05	9.90376	AACCGGTT	57363	57363	114726	1.51199e-05	5.3554	AACCGGTT	7198	7198	14396	1.70991e-05	6.05644	AACCGGTT	352909	352909	705818	2.01e-05	7.11934	AACCGGTT	154360
AACCGTAA	5073	5075	10148	5.2609e-06		AACCGTAA	3846	3595	7441	2.34791e-05	4.46295	AACCGTAA	30	16	46	1.22405e-05	2.3267	AACCGTAA	96553	94826	191379	1.98788e-05	3.77859	AACCGTAA	37383	35815	73198	2.38956e-05	4.54212	AACCGTAA	47270	46569	93839	1.23672e-05	2.35077	AACCGTAA	5288	5263	10551	1.25322e-05	2.38213	AACCGTAA	370778	369804	740582	2.109e-05	4.00883	AACCGTAA	147416
AACCGTAC	2290	2284	4574	2.37124e-06		AACCGTAC	2800	2533	5333	1.68276e-05	7.09655	AACCGTAC	16	10	26	6.91856e-06	2.9177	AACCGTAC	66155	65744	131899	1.37005e-05	5.77779	AACCGTAC	24601	23942	48543	1.5847e-05	6.68299	AACCGTAC	48803	49070	97873	1.28988e-05	5.43969	AACCGTAC	5226	5312	10538	1.25167e-05	5.27856	AACCGTAC	224433	223807	448240	1.27648e-05	5.38318	AACCGTAC	100334
AACCGTAG	3280	3421	6701	3.47391e-06		AACCGTAG	2247	2578	4825	1.52247e-05	4.38257	AACCGTAG	32	41	73	1.94252e-05	5.59173	AACCGTAG	62771	62431	125202	1.30049e-05	3.74359	AACCGTAG	22130	21664	43794	1.42966e-05	4.11543	AACCGTAG	44323	44675	88998	1.17292e-05	3.37636	AACCGTAG	4980	4979	9959	1.1829e-05	3.4051	AACCGTAG	222139	221508	443647	1.2634e-05	3.63683	AACCGTAG	99859
AACCGTAT	4768	4742	9510	4.93015e-06		AACCGTAT	3698	3709	7407	2.33719e-05	4.7406	AACCGTAT	29	35	64	1.70303e-05	3.45432	AACCGTAT	100041	100677	200718	2.08488e-05	4.22885	AACCGTAT	38165	39508	77673	2.53565e-05	5.14316	AACCGTAT	53962	53965	107927	1.42238e-05	2.88508	AACCGTAT	6331	6483	12814	1.52201e-05	3.08715	AACCGTAT	311113	311624	622737	1.77341e-05	3.59707	AACCGTAT	131443
AACCGTCA	4131	4246	8377	4.34278e-06		AACCGTCA	3777	4131	7908	2.49527e-05	5.74579	AACCGTCA	34	16	50	1.33049e-05	3.06369	AACCGTCA	121307	120320	241627	2.50981e-05	5.77927	AACCGTCA	41732	41029	82761	2.70175e-05	6.22125	AACCGTCA	83490	83701	167191	2.20343e-05	5.07378	AACCGTCA	10066	9847	19913	2.36521e-05	5.4463	AACCGTCA	329830	329920	659750	1.87881e-05	4.32629	AACCGTCA	141249
AACCGTCC	3068	3114	6182	3.20485e-06		AACCGTCC	2680	2873	5553	1.75218e-05	5.46727	AACCGTCC	13	25	38	1.01117e-05	3.15513	AACCGTCC	91466	91951	183417	1.90518e-05	5.94466	AACCGTCC	26451	27215	53666	1.75194e-05	5.46651	AACCGTCC	69120	68712	137832	1.81651e-05	5.66798	AACCGTCC	8316	8309	16625	1.97467e-05	6.16149	AACCGTCC	205690	205034	410724	1.16965e-05	3.64961	AACCGTCC	91774
AACCGTCG	584	573	1157	5.99809e-07		AACCGTCG	3322	3599	6921	2.18383e-05	36.4089	AACCGTCG	37	41	78	2.07557e-05	34.6039	AACCGTCG	126531	126623	253154	2.62954e-05	43.8397	AACCGTCG	39858	39243	79101	2.58227e-05	43.0516	AACCGTCG	73420	73907	147327	1.94164e-05	32.371	AACCGTCG	8359	8376	16735	1.98773e-05	33.1395	AACCGTCG	220726	218325	439051	1.25031e-05	20.8452	AACCGTCG	90427
AACCGTCT	4405	4491	8896	4.61184e-06		AACCGTCT	3209	3692	6901	2.17752e-05	4.7216	AACCGTCT	39	17	56	1.49015e-05	3.23115	AACCGTCT	90533	91930	182463	1.89527e-05	4.10957	AACCGTCT	30278	32276	62554	2.04209e-05	4.42793	AACCGTCT	79750	79670	159420	2.10102e-05	4.55571	AACCGTCT	9297	9358	18655	2.21579e-05	4.80456	AACCGTCT	292960	292259	585219	1.66657e-05	3.61367	AACCGTCT	125499
AACCGTGA	5535	5631	11166	5.78865e-06		AACCGTGA	3661	3317	6978	2.20182e-05	3.80369	AACCGTGA	15	13	28	7.45076e-06	1.28713	AACCGTGA	100940	98042	198982	2.06685e-05	3.57053	AACCGTGA	34887	33677	68564	2.23829e-05	3.86668	AACCGTGA	66451	66086	132537	1.74672e-05	3.0175	AACCGTGA	7639	7584	15223	1.80814e-05	3.1236	AACCGTGA	301042	301192	602234	1.71502e-05	2.96273	AACCGTGA	138261
AACCGTGC	3663	3742	7405	3.83888e-06		AACCGTGC	3004	2812	5816	1.83517e-05	4.78047	AACCGTGC	21	41	62	1.64981e-05	4.29764	AACCGTGC	105031	105478	210509	2.18658e-05	5.69589	AACCGTGC	34080	33986	68066	2.22203e-05	5.78822	AACCGTGC	60182	60206	120388	1.58661e-05	4.133	AACCGTGC	6775	6763	13538	1.608e-05	4.18873	AACCGTGC	204643	203879	408522	1.16337e-05	3.03051	AACCGTGC	92712
AACCGTGG	6227	6314	12541	6.50147e-06		AACCGTGG	3523	2986	6509	2.05383e-05	3.15903	AACCGTGG	27	34	61	1.6232e-05	2.49667	AACCGTGG	98461	97393	195854	2.03436e-05	3.12908	AACCGTGG	33415	32601	66016	2.15511e-05	3.3148	AACCGTGG	67372	67667	135039	1.7797e-05	2.73738	AACCGTGG	7966	7981	15947	1.89414e-05	2.9134	AACCGTGG	204236	204030	408266	1.16265e-05	1.78828	AACCGTGG	95207
AACCGTGT	5411	5514	10925	5.66371e-06		AACCGTGT	3417	3356	6773	2.13714e-05	3.77339	AACCGTGT	35	44	79	2.10218e-05	3.71167	AACCGTGT	71548	68217	139765	1.45176e-05	2.56326	AACCGTGT	26463	23553	50016	1.63278e-05	2.88289	AACCGTGT	55194	54892	110086	1.45084e-05	2.56164	AACCGTGT	6165	6129	12294	1.46025e-05	2.57825	AACCGTGT	272720	263074	535794	1.52582e-05	2.69402	AACCGTGT	121601
AACCGTTA	3400	3208	6608	3.4257e-06		AACCGTTA	3570	3699	7269	2.29364e-05	6.69539	AACCGTTA	49	26	75	1.99574e-05	5.82579	AACCGTTA	98237	99801	198038	2.05705e-05	6.00475	AACCGTTA	38171	39497	77668	2.53549e-05	7.40137	AACCGTTA	41091	40765	81856	1.07879e-05	3.14911	AACCGTTA	4935	4964	9899	1.17577e-05	3.43222	AACCGTTA	319938	319953	639891	1.82226e-05	5.31938	AACCGTTA	139228
AACCGTTC	3228	3231	6459	3.34846e-06		AACCGTTC	3894	3873	7767	2.45078e-05	7.31913	AACCGTTC	24	33	57	1.51676e-05	4.52974	AACCGTTC	126726	126015	252741	2.62525e-05	7.84019	AACCGTTC	42774	41650	84424	2.75604e-05	8.23078	AACCGTTC	67744	67831	135575	1.78676e-05	5.33607	AACCGTTC	8217	8143	16360	1.94319e-05	5.80325	AACCGTTC	354446	354169	708615	2.01797e-05	6.02657	AACCGTTC	167844
AACCGTTG	3036	3028	6064	3.14368e-06		AACCGTTG	4023	4260	8283	2.6136e-05	8.31381	AACCGTTG	34	39	73	1.94252e-05	6.17912	AACCGTTG	129649	128944	258593	2.68604e-05	8.54425	AACCGTTG	44083	42756	86839	2.83488e-05	9.0177	AACCGTTG	75449	75618	151067	1.99093e-05	6.33312	AACCGTTG	9015	9014	18029	2.14143e-05	6.81186	AACCGTTG	374062	373747	747809	2.12958e-05	6.77417	AACCGTTG	175255
AACCGTTT	5796	5715	11511	5.9675e-06		AACCGTTT	4778	5200	9978	3.14843e-05	5.27597	AACCGTTT	77	33	110	2.92708e-05	4.90504	AACCGTTT	153703	151488	305191	3.17006e-05	5.31221	AACCGTTT	59714	58232	117946	3.85037e-05	6.45224	AACCGTTT	68617	68240	136857	1.80366e-05	3.02247	AACCGTTT	8214	8134	16348	1.94177e-05	3.2539	AACCGTTT	609792	609329	1219121	3.47177e-05	5.8178	AACCGTTT	260080
AAGCGAAA	6447	6533	12980	6.72905e-06		AAGCGAAA	5234	4118	9352	2.95091e-05	4.38532	AAGCGAAA	40	25	65	1.72964e-05	2.57041	AAGCGAAA	182179	185930	368109	3.8236e-05	5.68222	AAGCGAAA	77127	79600	156727	5.11639e-05	7.60343	AAGCGAAA	127671	128738	256409	3.37925e-05	5.02188	AAGCGAAA	14365	14466	28831	3.42446e-05	5.08907	AAGCGAAA	987492	984767	1972259	5.61653e-05	8.34669	AAGCGAAA	396400
AAGCGAAC	2973	2990	5963	3.09132e-06		AAGCGAAC	3315	2898	6213	1.96043e-05	6.34174	AAGCGAAC	27	23	50	1.33049e-05	4.30396	AAGCGAAC	102582	102171	204753	2.1268e-05	6.87989	AAGCGAAC	38073	37760	75833	2.47558e-05	8.00818	AAGCGAAC	86584	86523	173107	2.2814e-05	7.38002	AAGCGAAC	9471	9574	19045	2.26211e-05	7.31761	AAGCGAAC	439300	438766	878066	2.50053e-05	8.08886	AAGCGAAC	193592
AAGCGAAG	6097	5989	12086	6.26559e-06		AAGCGAAG	4142	3085	7227	2.28039e-05	3.63954	AAGCGAAG	38	30	68	1.80947e-05	2.88795	AAGCGAAG	136229	134525	270754	2.81236e-05	4.48857	AAGCGAAG	49222	47840	97062	3.16861e-05	5.05716	AAGCGAAG	135479	136089	271568	3.57903e-05	5.7122	AAGCGAAG	14416	14546	28962	3.44002e-05	5.49034	AAGCGAAG	502765	501314	1004079	2.85938e-05	4.56363	AAGCGAAG	204443
AAGCGAAT	4697	4683	9380	4.86275e-06		AAGCGAAT	3652	3603	7255	2.28922e-05	4.70767	AAGCGAAT	33	22	55	1.46354e-05	3.0097	AAGCGAAT	131292	129960	261252	2.71366e-05	5.5805	AAGCGAAT	52828	52061	104889	3.42412e-05	7.04153	AAGCGAAT	95121	95191	190312	2.50815e-05	5.15788	AAGCGAAT	10518	10352	20870	2.47888e-05	5.09768	AAGCGAAT	641894	640763	1282657	3.65271e-05	7.5116	AAGCGAAT	268103
AAGCGACA	4346	4400	8746	4.53408e-06		AAGCGACA	3297	2862	6159	1.9434e-05	4.2862	AAGCGACA	42	16	58	1.54337e-05	3.40394	AAGCGACA	98045	99927	197972	2.05636e-05	4.53535	AAGCGACA	35101	36451	71552	2.33583e-05	5.15172	AAGCGACA	113652	113556	227208	2.99441e-05	6.60422	AAGCGACA	12308	12418	24726	2.93688e-05	6.47735	AAGCGACA	393060	394443	787503	2.24262e-05	4.94615	AAGCGACA	159562
AAGCGACC	2685	2849	5534	2.86892e-06		AAGCGACC	2775	2608	5383	1.69854e-05	5.92048	AAGCGACC	20	42	62	1.64981e-05	5.75064	AAGCGACC	97787	95451	193238	2.00719e-05	6.99632	AAGCGACC	31157	29347	60504	1.97517e-05	6.8847	AAGCGACC	87768	87089	174857	2.30446e-05	8.03251	AAGCGACC	9112	8881	17993	2.13716e-05	7.44934	AAGCGACC	241202	241013	482215	1.37324e-05	4.78659	AAGCGACC	103859
AAGCGACG	916	1032	1948	1.00988e-06		AAGCGACG	3011	2783	5794	1.82822e-05	18.1034	AAGCGACG	53	18	71	1.8893e-05	18.7082	AAGCGACG	111053	112951	224004	2.32676e-05	23.04	AAGCGACG	34194	35802	69996	2.28503e-05	22.6269	AAGCGACG	105584	105960	211544	2.78797e-05	27.607	AAGCGACG	10856	11004	21860	2.59647e-05	25.7107	AAGCGACG	246106	247595	493701	1.40594e-05	13.9219	AAGCGACG	98821
AAGCGACT	3940	3961	7901	4.09601e-06		AAGCGACT	2824	2457	5281	1.66635e-05	4.06823	AAGCGACT	30	31	61	1.6232e-05	3.96288	AAGCGACT	86998	87930	174928	1.817e-05	4.43602	AAGCGACT	31340	32153	63493	2.07274e-05	5.06039	AAGCGACT	91256	91338	182594	2.40643e-05	5.87506	AAGCGACT	9661	9716	19377	2.30154e-05	5.61898	AAGCGACT	329833	329872	659705	1.87868e-05	4.58662	AAGCGACT	137914
AAGCGAGA	6135	6145	12280	6.36616e-06		AAGCGAGA	3035	2695	5730	1.80803e-05	2.84006	AAGCGAGA	39	30	69	1.83608e-05	2.88412	AAGCGAGA	86723	87483	174206	1.8095e-05	2.84237	AAGCGAGA	29337	29802	59139	1.93061e-05	3.0326	AAGCGAGA	137842	138565	276407	3.64281e-05	5.72214	AAGCGAGA	14581	14634	29215	3.47007e-05	5.45081	AAGCGAGA	453973	455687	909660	2.5905e-05	4.06917	AAGCGAGA	162064
AAGCGAGC	3836	3766	7602	3.94101e-06		AAGCGAGC	2841	2552	5393	1.70169e-05	4.31792	AAGCGAGC	28	26	54	1.43693e-05	3.64611	AAGCGAGC	107750	107948	215698	2.24048e-05	5.68505	AAGCGAGC	37234	37426	74660	2.43729e-05	6.18444	AAGCGAGC	119444	119292	238736	3.14633e-05	7.98358	AAGCGAGC	11723	11473	23196	2.75515e-05	6.99099	AAGCGAGC	305311	304862	610173	1.73763e-05	4.4091	AAGCGAGC	122586
AAGCGAGG	7126	7061	14187	7.35478e-06		AAGCGAGG	2354	2182	4536	1.43128e-05	1.94605	AAGCGAGG	32	31	63	1.67642e-05	2.27936	AAGCGAGG	77445	78829	156274	1.62324e-05	2.20705	AAGCGAGG	21896	22486	44382	1.44886e-05	1.96996	AAGCGAGG	120587	120735	241322	3.18042e-05	4.32428	AAGCGAGG	12435	12368	24803	2.94603e-05	4.00559	AAGCGAGG	260803	261146	521949	1.48639e-05	2.02098	AAGCGAGG	105105
AAGCGAGT	4371	4487	8858	4.59214e-06		AAGCGAGT	2650	2410	5060	1.59662e-05	3.47685	AAGCGAGT	27	25	52	1.38371e-05	3.01322	AAGCGAGT	78465	77463	155928	1.61964e-05	3.52699	AAGCGAGT	29775	28879	58654	1.91477e-05	4.16967	AAGCGAGT	93816	93994	187810	2.47517e-05	5.39002	AAGCGAGT	9583	9626	19209	2.28159e-05	4.96847	AAGCGAGT	327571	326621	654192	1.86299e-05	4.0569	AAGCGAGT	141076
AAGCGATA	3648	3523	7171	3.71757e-06		AAGCGATA	3613	3453	7066	2.22959e-05	5.99743	AAGCGATA	45	23	68	1.80947e-05	4.86735	AAGCGATA	143715	141404	285119	2.96157e-05	7.96641	AAGCGATA	59416	57635	117051	3.82116e-05	10.2786	AAGCGATA	86450	86615	173065	2.28085e-05	6.13532	AAGCGATA	9617	9668	19285	2.29062e-05	6.16159	AAGCGATA	447443	449037	896480	2.55296e-05	6.8673	AAGCGATA	186281
AAGCGATC	2996	3053	6049	3.13591e-06		AAGCGATC	3805	3418	7223	2.27913e-05	7.26784	AAGCGATC	17	42	59	1.56998e-05	5.00647	AAGCGATC	182686	180781	363467	3.77538e-05	12.0392	AAGCGATC	55581	54372	109953	3.58944e-05	11.4463	AAGCGATC	97778	97681	195459	2.57598e-05	8.21447	AAGCGATC	10613	10532	21145	2.51154e-05	8.00898	AAGCGATC	365965	365377	731342	2.08269e-05	6.64143	AAGCGATC	153438
AAGCGATG	5258	5315	10573	5.48122e-06		AAGCGATG	4605	3828	8433	2.66093e-05	4.85462	AAGCGATG	29	37	66	1.75625e-05	3.20412	AAGCGATG	188857	189922	378779	3.93443e-05	7.17801	AAGCGATG	72768	73434	146202	4.7728e-05	8.70754	AAGCGATG	123185	122238	245423	3.23446e-05	5.90099	AAGCGATG	13355	13336	26691	3.17028e-05	5.78389	AAGCGATG	441700	442056	883756	2.51673e-05	4.59155	AAGCGATG	187495
AAGCGATT	4952	4881	9833	5.0976e-06		AAGCGATT	4998	4047	9045	2.85404e-05	5.59879	AAGCGATT	33	37	70	1.86269e-05	3.65406	AAGCGATT	200068	200332	400400	4.15901e-05	8.15876	AAGCGATT	87067	86843	173910	5.67733e-05	11.1373	AAGCGATT	92309	92234	184543	2.43212e-05	4.77111	AAGCGATT	10057	10038	20095	2.38682e-05	4.68226	AAGCGATT	591957	592028	1183985	3.37171e-05	6.61432	AAGCGATT	237769
AAGCGCAA	3782	3691	7473	3.87413e-06		AAGCGCAA	6502	4450	10952	3.45577e-05	8.92011	AAGCGCAA	36	37	73	1.94252e-05	5.01408	AAGCGCAA	194794	198092	392886	4.08096e-05	10.5339	AAGCGCAA	68724	71793	140517	4.58721e-05	11.8406	AAGCGCAA	142309	142232	284541	3.75e-05	9.6796	AAGCGCAA	14685	14715	29400	3.49205e-05	9.01375	AAGCGCAA	444909	443156	888065	2.529e-05	6.52792	AAGCGCAA	184010
AAGCGCAC	2972	3052	6024	3.12294e-06		AAGCGCAC	3937	3507	7444	2.34886e-05	7.5213	AAGCGCAC	38	44	82	2.18201e-05	6.98702	AAGCGCAC	146537	145184	291721	3.03014e-05	9.70284	AAGCGCAC	45136	43516	88652	2.89406e-05	9.2671	AAGCGCAC	84022	84391	168413	2.21954e-05	7.10719	AAGCGCAC	7726	7870	15596	1.85245e-05	5.93173	AAGCGCAC	268038	267765	535803	1.52584e-05	4.8859	AAGCGCAC	121608
AAGCGCAG	6341	6377	12718	6.59323e-06		AAGCGCAG	4190	3501	7691	2.4268e-05	3.68074	AAGCGCAG	70	32	102	2.71421e-05	4.11666	AAGCGCAG	209603	210250	419853	4.36107e-05	6.61446	AAGCGCAG	66722	67342	134064	4.37655e-05	6.63794	AAGCGCAG	118374	118689	237063	3.12429e-05	4.73863	AAGCGCAG	11823	12063	23886	2.83711e-05	4.30306	AAGCGCAG	312529	310361	622890	1.77384e-05	2.6904	AAGCGCAG	129092
AAGCGCAT	3862	3918	7780	4.03329e-06		AAGCGCAT	4306	4095	8401	2.65083e-05	6.57238	AAGCGCAT	36	32	68	1.80947e-05	4.48634	AAGCGCAT	187168	186160	373328	3.87781e-05	9.61451	AAGCGCAT	62786	62408	125194	4.08699e-05	10.1331	AAGCGCAT	108819	108196	217015	2.86007e-05	7.09117	AAGCGCAT	11143	11150	22293	2.6479e-05	6.56511	AAGCGCAT	404297	404200	808497	2.30241e-05	5.70852	AAGCGCAT	183865
AAGCGCCA	4520	4655	9175	4.75648e-06		AAGCGCCA	3714	4044	7758	2.44794e-05	5.14654	AAGCGCCA	44	36	80	2.12879e-05	4.47556	AAGCGCCA	185465	186001	371466	3.85847e-05	8.11202	AAGCGCCA	61703	61538	123241	4.02323e-05	8.45842	AAGCGCCA	113697	113589	227286	2.99543e-05	6.29759	AAGCGCCA	12119	11873	23992	2.8497e-05	5.9912	AAGCGCCA	281301	281974	563275	1.60407e-05	3.3724	AAGCGCCA	109246
AAGCGCCC	4067	4015	8082	4.18985e-06		AAGCGCCC	2854	3098	5952	1.87808e-05	4.48245	AAGCGCCC	40	75	115	3.06013e-05	7.30369	AAGCGCCC	139289	138881	278170	2.88939e-05	6.89616	AAGCGCCC	38034	38674	76708	2.50415e-05	5.97671	AAGCGCCC	78333	78916	157249	2.07241e-05	4.94626	AAGCGCCC	7906	8272	16178	1.92158e-05	4.58627	AAGCGCCC	145198	145761	290959	8.28583e-06	1.9776	AAGCGCCC	58153
AAGCGCCG	1699	1684	3383	1.75381e-06		AAGCGCCG	4459	4117	8576	2.70605e-05	15.4296	AAGCGCCG	63	32	95	2.52794e-05	14.414	AAGCGCCG	239586	239036	478622	4.97151e-05	28.347	AAGCGCCG	69357	68959	138316	4.51536e-05	25.7461	AAGCGCCG	98115	98057	196172	2.58538e-05	14.7415	AAGCGCCG	10053	9878	19931	2.36735e-05	13.4983	AAGCGCCG	202179	200994	403173	1.14814e-05	6.54658	AAGCGCCG	70835
AAGCGCCT	4906	4862	9768	5.0639e-06		AAGCGCCT	3787	3723	7510	2.36969e-05	4.67957	AAGCGCCT	31	34	65	1.72964e-05	3.41563	AAGCGCCT	170613	172370	342983	3.56261e-05	7.03531	AAGCGCCT	50837	51603	102440	3.34418e-05	6.60396	AAGCGCCT	94871	95184	190055	2.50476e-05	4.94631	AAGCGCCT	9761	9885	19646	2.33349e-05	4.6081	AAGCGCCT	238448	240517	478965	1.36398e-05	2.69354	AAGCGCCT	94798
AAGCGCGA	800	801	1601	8.29986e-07		AAGCGCGA	4478	3336	7814	2.46561e-05	29.7066	AAGCGCGA	44	67	111	2.95369e-05	35.5873	AAGCGCGA	172960	171308	344268	3.57596e-05	43.0845	AAGCGCGA	49279	48664	97943	3.19737e-05	38.5232	AAGCGCGA	101669	101885	203554	2.68267e-05	32.3218	AAGCGCGA	9423	9566	18989	2.25546e-05	27.1747	AAGCGCGA	217735	218097	435832	1.24115e-05	14.9538	AAGCGCGA	85312
AAGCGCGC	1177	1231	2408	1.24835e-06		AAGCGCGC	4737	3925	8662	2.73319e-05	21.8944	AAGCGCGC	77	61	138	3.67216e-05	29.4162	AAGCGCGC	250694	249449	500143	5.19505e-05	41.6154	AAGCGCGC	76002	75113	151115	4.93318e-05	39.5177	AAGCGCGC	88320	88507	176827	2.33043e-05	18.6681	AAGCGCGC	7861	7992	15853	1.88297e-05	15.0837	AAGCGCGC	200645	200660	401305	1.14282e-05	9.15467	AAGCGCGC	65987
AAGCGCGG	1650	1719	3369	1.74655e-06		AAGCGCGG	3963	3461	7424	2.34255e-05	13.4125	AAGCGCGG	60	48	108	2.87387e-05	16.4546	AAGCGCGG	195102	196009	391111	4.06252e-05	23.2603	AAGCGCGG	54794	56292	111086	3.62643e-05	20.7634	AAGCGCGG	81019	81023	162042	2.13557e-05	12.2274	AAGCGCGG	7871	7886	15757	1.87157e-05	10.7158	AAGCGCGG	146881	146878	293759	8.36557e-06	4.78977	AAGCGCGG	57281
AAGCGCGT	983	992	1975	1.02387e-06		AAGCGCGT	4002	3473	7475	2.35864e-05	23.0365	AAGCGCGT	55	27	82	2.18201e-05	21.3113	AAGCGCGT	160526	161868	322394	3.34875e-05	32.7066	AAGCGCGT	54001	55207	109208	3.56512e-05	34.8199	AAGCGCGT	74561	74671	149232	1.96675e-05	19.2089	AAGCGCGT	6683	6748	13431	1.59529e-05	15.581	AAGCGCGT	198541	198306	396847	1.13013e-05	11.0378	AAGCGCGT	80575
AAGCGCTA	3081	3087	6168	3.1976e-06		AAGCGCTA	2670	1876	4546	1.43443e-05	4.48597	AAGCGCTA	23	38	61	1.6232e-05	5.07632	AAGCGCTA	102488	102500	204988	2.12924e-05	6.65887	AAGCGCTA	37878	37497	75375	2.46063e-05	7.69526	AAGCGCTA	58597	58643	117240	1.54512e-05	4.83213	AAGCGCTA	5881	5950	11831	1.40525e-05	4.39471	AAGCGCTA	270177	270470	540647	1.53964e-05	4.81498	AAGCGCTA	114972
AAGCGCTC	4546	4699	9245	4.79277e-06		AAGCGCTC	3580	3555	7135	2.25136e-05	4.69741	AAGCGCTC	60	28	88	2.34167e-05	4.88584	AAGCGCTC	189848	187463	377311	3.91918e-05	8.17728	AAGCGCTC	54256	52805	107061	3.49503e-05	7.2923	AAGCGCTC	101894	101798	203692	2.68448e-05	5.60112	AAGCGCTC	9827	9750	19577	2.3253e-05	4.85168	AAGCGCTC	278557	279326	557883	1.58872e-05	3.31483	AAGCGCTC	118420
AAGCGCTG	6340	6485	12825	6.6487e-06		AAGCGCTG	4729	3656	8385	2.64578e-05	3.9794	AAGCGCTG	44	37	81	2.1554e-05	3.24184	AAGCGCTG	264095	268806	532901	5.53531e-05	8.3254	AAGCGCTG	79021	82532	161553	5.27393e-05	7.93228	AAGCGCTG	110733	110559	221292	2.91644e-05	4.38648	AAGCGCTG	11555	11387	22942	2.72498e-05	4.09852	AAGCGCTG	338561	338064	676625	1.92687e-05	2.89811	AAGCGCTG	142179
AAGCGCTT	5569	5569	11138	5.77413e-06		AAGCGCTT	3703	3703	7406	2.33687e-05	4.04714	AAGCGCTT	37	53	90	2.39489e-05	4.14762	AAGCGCTT	210138	210138	420276	4.36546e-05	7.56038	AAGCGCTT	71357	71357	142714	4.65893e-05	8.06863	AAGCGCTT	107700	107700	215400	2.83879e-05	4.91639	AAGCGCTT	10915	10915	21830	2.5929e-05	4.49055	AAGCGCTT	405024	405024	810048	2.30683e-05	3.99511	AAGCGCTT	171605
AAGCGGAA	5921	5802	11723	6.0774e-06		AAGCGGAA	4793	3785	8578	2.70668e-05	4.45368	AAGCGGAA	48	21	69	1.83608e-05	3.02116	AAGCGGAA	196488	196933	393421	4.08651e-05	6.72411	AAGCGGAA	70356	70624	140980	4.60232e-05	7.57284	AAGCGGAA	119922	120155	240077	3.16401e-05	5.20618	AAGCGGAA	13613	13519	27132	3.22266e-05	5.30269	AAGCGGAA	564080	564763	1128843	3.21468e-05	5.28956	AAGCGGAA	238539
AAGCGGAC	2923	2805	5728	2.96949e-06		AAGCGGAC	2521	2064	4585	1.44674e-05	4.87201	AAGCGGAC	27	25	52	1.38371e-05	4.65976	AAGCGGAC	101763	100939	202702	2.10549e-05	7.09041	AAGCGGAC	28585	28237	56822	1.85497e-05	6.24674	AAGCGGAC	81540	81826	163366	2.15302e-05	7.25047	AAGCGGAC	8668	8661	17329	2.05829e-05	6.93144	AAGCGGAC	233673	234226	467899	1.33247e-05	4.48718	AAGCGGAC	100033
AAGCGGAG	6146	6288	12434	6.446e-06		AAGCGGAG	2973	2504	5477	1.7282e-05	2.68104	AAGCGGAG	30	17	47	1.25066e-05	1.94022	AAGCGGAG	102814	103558	206372	2.14361e-05	3.32549	AAGCGGAG	30668	31900	62568	2.04255e-05	3.1687	AAGCGGAG	105071	105224	210295	2.77151e-05	4.29958	AAGCGGAG	11808	11570	23378	2.77677e-05	4.30774	AAGCGGAG	292362	292212	584574	1.66473e-05	2.58258	AAGCGGAG	115208
AAGCGGAT	3362	3442	6804	3.52731e-06		AAGCGGAT	3942	3450	7392	2.33245e-05	6.61255	AAGCGGAT	40	31	71	1.8893e-05	5.35621	AAGCGGAT	181927	183221	365148	3.79284e-05	10.7528	AAGCGGAT	60618	61509	122127	3.98686e-05	11.3028	AAGCGGAT	91998	92484	184482	2.43131e-05	6.89283	AAGCGGAT	10533	10508	21041	2.49919e-05	7.08525	AAGCGGAT	336141	338092	674233	1.92006e-05	5.4434	AAGCGGAT	145602
AAGCGGCA	5573	5644	11217	5.81509e-06		AAGCGGCA	4091	3456	7547	2.38136e-05	4.09514	AAGCGGCA	36	32	68	1.80947e-05	3.11168	AAGCGGCA	209301	210130	419431	4.35668e-05	7.49204	AAGCGGCA	69064	69416	138480	4.52071e-05	7.77411	AAGCGGCA	113480	111842	225322	2.96955e-05	5.10663	AAGCGGCA	11489	11395	22884	2.71809e-05	4.67421	AAGCGGCA	309655	308161	617816	1.75939e-05	3.02557	AAGCGGCA	123934
AAGCGGCC	4867	4856	9723	5.04057e-06		AAGCGGCC	3595	3139	6734	2.12483e-05	4.21545	AAGCGGCC	46	62	108	2.87387e-05	5.70147	AAGCGGCC	200297	200658	400955	4.16477e-05	8.2625	AAGCGGCC	46700	46666	93366	3.04795e-05	6.04684	AAGCGGCC	98556	98834	197390	2.60143e-05	5.16098	AAGCGGCC	10289	10526	20815	2.47234e-05	4.90489	AAGCGGCC	199881	199683	399564	1.13786e-05	2.25741	AAGCGGCC	73769
AAGCGGCG	2116	2076	4192	2.1732e-06		AAGCGGCG	4368	3930	8298	2.61833e-05	12.0482	AAGCGGCG	46	23	69	1.83608e-05	8.44872	AAGCGGCG	292251	294166	586417	6.09119e-05	28.0286	AAGCGGCG	86561	87998	174559	5.69852e-05	26.2217	AAGCGGCG	109995	110062	220057	2.90016e-05	13.3451	AAGCGGCG	10840	10986	21826	2.59243e-05	11.9291	AAGCGGCG	220212	219773	439985	1.25297e-05	5.76556	AAGCGGCG	76582
AAGCGGCT	5357	5298	10655	5.52373e-06		AAGCGGCT	3816	3400	7216	2.27692e-05	4.12206	AAGCGGCT	29	30	59	1.56998e-05	2.84225	AAGCGGCT	203071	201791	404862	4.20535e-05	7.61324	AAGCGGCT	61730	59794	121524	3.96718e-05	7.18206	AAGCGGCT	96246	95940	192186	2.53285e-05	4.58539	AAGCGGCT	10127	10108	20235	2.40345e-05	4.35114	AAGCGGCT	280683	279323	560006	1.59477e-05	2.88711	AAGCGGCT	113671
AAGCGGGA	6754	6623	13377	6.93487e-06		AAGCGGGA	2921	2435	5356	1.69002e-05	2.43699	AAGCGGGA	16	44	60	1.59659e-05	2.30227	AAGCGGGA	125138	126185	251323	2.61052e-05	3.76435	AAGCGGGA	38989	39732	78721	2.56986e-05	3.70572	AAGCGGGA	96255	96098	192353	2.53505e-05	3.65551	AAGCGGGA	11066	10881	21947	2.6068e-05	3.75898	AAGCGGGA	253012	251484	504496	1.43669e-05	2.07169	AAGCGGGA	103233
AAGCGGGC	4319	4396	8715	4.51801e-06		AAGCGGGC	3147	2703	5850	1.84589e-05	4.08564	AAGCGGGC	45	35	80	2.12879e-05	4.71179	AAGCGGGC	193856	195273	389129	4.04193e-05	8.94628	AAGCGGGC	53387	54311	107698	3.51582e-05	7.78181	AAGCGGGC	86368	86461	172829	2.27774e-05	5.04147	AAGCGGGC	8707	8667	17374	2.06363e-05	4.56757	AAGCGGGC	147426	147341	294767	8.39427e-06	1.85796	AAGCGGGC	56060
AAGCGGGG	7960	7876	15836	8.20965e-06		AAGCGGGG	2241	1946	4187	1.32116e-05	1.60927	AAGCGGGG	38	50	88	2.34167e-05	2.85233	AAGCGGGG	99406	99031	198437	2.06119e-05	2.51069	AAGCGGGG	27230	27228	54458	1.77779e-05	2.16549	AAGCGGGG	66992	67454	134446	1.77188e-05	2.15829	AAGCGGGG	7414	7567	14981	1.7794e-05	2.16745	AAGCGGGG	136878	136330	273208	7.78032e-06	0.947704	AAGCGGGG	54788
AAGCGGGT	4483	4502	8985	4.65798e-06		AAGCGGGT	3451	2978	6429	2.02859e-05	4.35509	AAGCGGGT	67	27	94	2.50133e-05	5.36998	AAGCGGGT	146064	144983	291047	3.02314e-05	6.49025	AAGCGGGT	44600	42638	87238	2.8479e-05	6.11403	AAGCGGGT	72059	72157	144216	1.90064e-05	4.0804	AAGCGGGT	7951	7794	15745	1.87014e-05	4.01493	AAGCGGGT	177177	176660	353837	1.00764e-05	2.16327	AAGCGGGT	76107
AAGCGGTA	3152	3057	6209	3.21885e-06		AAGCGGTA	3679	3361	7040	2.22138e-05	6.90117	AAGCGGTA	29	29	58	1.54337e-05	4.79479	AAGCGGTA	143592	144601	288193	2.9935e-05	9.29989	AAGCGGTA	51601	53161	104762	3.41998e-05	10.6248	AAGCGGTA	71197	71389	142586	1.87916e-05	5.83798	AAGCGGTA	7452	7748	15200	1.80541e-05	5.60887	AAGCGGTA	276802	276716	553518	1.57629e-05	4.89705	AAGCGGTA	122327
AAGCGGTC	2915	2815	5730	2.97053e-06		AAGCGGTC	3242	3162	6404	2.0207e-05	6.8025	AAGCGGTC	44	44	88	2.34167e-05	7.883	AAGCGGTC	158727	159201	317928	3.30236e-05	11.1171	AAGCGGTC	42060	42565	84625	2.7626e-05	9.30003	AAGCGGTC	83604	83522	167126	2.20258e-05	7.41476	AAGCGGTC	8431	8550	16981	2.01695e-05	6.78988	AAGCGGTC	252342	253496	505838	1.44051e-05	4.84933	AAGCGGTC	106305
AAGCGGTG	4967	4951	9918	5.14166e-06		AAGCGGTG	3771	3212	6983	2.2034e-05	4.28538	AAGCGGTG	43	26	69	1.83608e-05	3.57099	AAGCGGTG	191414	190920	382334	3.97135e-05	7.72387	AAGCGGTG	62681	63055	125736	4.10468e-05	7.98318	AAGCGGTG	93354	93009	186363	2.4561e-05	4.77687	AAGCGGTG	9549	9498	19047	2.26235e-05	4.40003	AAGCGGTG	298604	298778	597382	1.7012e-05	3.30867	AAGCGGTG	136512
AAGCGGTT	3898	3638	7536	3.90679e-06		AAGCGGTT	4394	4130	8524	2.68964e-05	6.88453	AAGCGGTT	49	30	79	2.10218e-05	5.38083	AAGCGGTT	180337	180816	361153	3.75134e-05	9.60211	AAGCGGTT	62374	63394	125768	4.10572e-05	10.5092	AAGCGGTT	79651	79435	159086	2.09662e-05	5.36659	AAGCGGTT	9019	8922	17941	2.13098e-05	5.45455	AAGCGGTT	360439	360279	720718	2.05244e-05	5.25351	AAGCGGTT	154670
AAGCGTAA	4364	4387	8751	4.53667e-06		AAGCGTAA	3893	3390	7283	2.29806e-05	5.06552	AAGCGTAA	31	23	54	1.43693e-05	3.16737	AAGCGTAA	102997	103771	206768	2.14773e-05	4.73415	AAGCGTAA	43069	44217	87286	2.84947e-05	6.28098	AAGCGTAA	59969	60664	120633	1.58984e-05	3.50442	AAGCGTAA	6009	6056	12065	1.43305e-05	3.15881	AAGCGTAA	383896	381948	765844	2.18094e-05	4.80737	AAGCGTAA	163176
AAGCGTAC	2217	2304	4521	2.34376e-06		AAGCGTAC	2803	2553	5356	1.69002e-05	7.2107	AAGCGTAC	25	12	37	9.84565e-06	4.20079	AAGCGTAC	64045	64365	128410	1.33381e-05	5.69089	AAGCGTAC	24551	24487	49038	1.60086e-05	6.83028	AAGCGTAC	63632	63898	127530	1.68074e-05	7.17109	AAGCGTAC	6156	6156	12312	1.46238e-05	6.23946	AAGCGTAC	230912	229422	460334	1.31092e-05	5.59324	AAGCGTAC	105790
AAGCGTAG	3355	3463	6818	3.53457e-06		AAGCGTAG	2059	2115	4174	1.31705e-05	3.72621	AAGCGTAG	27	24	51	1.3571e-05	3.83952	AAGCGTAG	58528	58656	117184	1.21721e-05	3.44372	AAGCGTAG	23678	23479	47157	1.53945e-05	4.35541	AAGCGTAG	59085	59961	119046	1.56892e-05	4.4388	AAGCGTAG	5772	5897	11669	1.38601e-05	3.9213	AAGCGTAG	233160	232587	465747	1.32634e-05	3.75248	AAGCGTAG	101939
AAGCGTAT	4405	4587	8992	4.66161e-06		AAGCGTAT	4519	3676	8195	2.58583e-05	5.54708	AAGCGTAT	33	14	47	1.25066e-05	2.6829	AAGCGTAT	112350	113654	226004	2.34753e-05	5.03589	AAGCGTAT	46817	48489	95306	3.11129e-05	6.67428	AAGCGTAT	71310	71825	143135	1.8864e-05	4.04666	AAGCGTAT	7677	7546	15223	1.80814e-05	3.8788	AAGCGTAT	321860	322714	644574	1.8356e-05	3.93769	AAGCGTAT	134929
AAGCGTCA	4448	4540	8988	4.65953e-06		AAGCGTCA	3307	3489	6796	2.14439e-05	4.60216	AAGCGTCA	27	23	50	1.33049e-05	2.85542	AAGCGTCA	107639	107476	215115	2.23443e-05	4.79539	AAGCGTCA	39141	39565	78706	2.56937e-05	5.51423	AAGCGTCA	91199	91140	182339	2.40307e-05	5.15732	AAGCGTCA	9778	9510	19288	2.29097e-05	4.91674	AAGCGTCA	426211	424380	850591	2.42228e-05	5.19855	AAGCGTCA	138912
AAGCGTCC	4053	4084	8137	4.21836e-06		AAGCGTCC	2637	2598	5235	1.65184e-05	3.91583	AAGCGTCC	33	21	54	1.43693e-05	3.40638	AAGCGTCC	84461	83677	168138	1.74647e-05	4.14017	AAGCGTCC	26963	26718	53681	1.75243e-05	4.15429	AAGCGTCC	72555	72056	144611	1.90585e-05	4.51798	AAGCGTCC	7487	7374	14861	1.76515e-05	4.18444	AAGCGTCC	197945	198667	396612	1.12946e-05	2.67748	AAGCGTCC	82843
AAGCGTCG	871	794	1665	8.63165e-07		AAGCGTCG	3216	3222	6438	2.03143e-05	23.5347	AAGCGTCG	22	34	56	1.49015e-05	17.2638	AAGCGTCG	111802	113180	224982	2.33692e-05	27.0738	AAGCGTCG	35455	36745	72200	2.35698e-05	27.3063	AAGCGTCG	90854	91137	181991	2.39848e-05	27.7871	AAGCGTCG	8786	8805	17591	2.08941e-05	24.2064	AAGCGTCG	221202	221732	442934	1.26137e-05	14.6133	AAGCGTCG	86482
AAGCGTCT	5385	5294	10679	5.53618e-06		AAGCGTCT	3435	3419	6854	2.16269e-05	3.90648	AAGCGTCT	31	18	49	1.30388e-05	2.35521	AAGCGTCT	94156	93809	187965	1.95242e-05	3.52665	AAGCGTCT	33559	32963	66522	2.17163e-05	3.92261	AAGCGTCT	92157	92155	184312	2.42907e-05	4.38764	AAGCGTCT	9542	9452	18994	2.25605e-05	4.07511	AAGCGTCT	280371	280588	560959	1.59748e-05	2.88553	AAGCGTCT	113495
AAGCGTGA	5749	5720	11469	5.94573e-06		AAGCGTGA	3982	3069	7051	2.22485e-05	3.74194	AAGCGTGA	32	18	50	1.33049e-05	2.23773	AAGCGTGA	108030	107822	215852	2.24208e-05	3.77091	AAGCGTGA	40080	39737	79817	2.60564e-05	4.38238	AAGCGTGA	85476	85254	170730	2.25007e-05	3.78435	AAGCGTGA	8820	8604	17424	2.06957e-05	3.48077	AAGCGTGA	331218	330599	661817	1.8847e-05	3.16984	AAGCGTGA	142934
AAGCGTGC	4006	4068	8074	4.1857e-06		AAGCGTGC	3328	2662	5990	1.89007e-05	4.51554	AAGCGTGC	43	31	74	1.96913e-05	4.70442	AAGCGTGC	110663	109555	220218	2.28743e-05	5.46488	AAGCGTGC	36369	35626	71995	2.35029e-05	5.61505	AAGCGTGC	83382	83338	166720	2.19723e-05	5.24936	AAGCGTGC	7598	7749	15347	1.82287e-05	4.355	AAGCGTGC	239992	241503	481495	1.37118e-05	3.27588	AAGCGTGC	103697
AAGCGTGG	7100	6814	13914	7.21326e-06		AAGCGTGG	3794	2936	6730	2.12357e-05	2.94398	AAGCGTGG	23	44	67	1.78286e-05	2.47165	AAGCGTGG	111754	110883	222637	2.31256e-05	3.20599	AAGCGTGG	39776	38823	78599	2.56588e-05	3.55718	AAGCGTGG	89377	88755	178132	2.34763e-05	3.2546	AAGCGTGG	9267	9247	18514	2.19904e-05	3.04861	AAGCGTGG	227978	227998	455976	1.29851e-05	1.80018	AAGCGTGG	105581
AAGCGTGT	6109	5878	11987	6.21427e-06		AAGCGTGT	3526	3205	6731	2.12388e-05	3.41775	AAGCGTGT	49	15	64	1.70303e-05	2.74052	AAGCGTGT	82710	83209	165919	1.72342e-05	2.77333	AAGCGTGT	30754	31295	62049	2.0256e-05	3.2596	AAGCGTGT	76207	76199	152406	2.00858e-05	3.23221	AAGCGTGT	7483	7471	14954	1.77619e-05	2.85825	AAGCGTGT	273107	272307	545414	1.55321e-05	2.49943	AAGCGTGT	119938
AAGCGTTA	4010	4010	8020	4.15771e-06		AAGCGTTA	4179	3499	7678	2.4227e-05	5.827	AAGCGTTA	28	25	53	1.41032e-05	3.39207	AAGCGTTA	128260	129459	257719	2.67696e-05	6.43855	AAGCGTTA	58770	59888	118658	3.87362e-05	9.31672	AAGCGTTA	47261	46779	94040	1.23937e-05	2.98089	AAGCGTTA	4952	5006	9958	1.18278e-05	2.84479	AAGCGTTA	340270	338460	678730	1.93286e-05	4.64887	AAGCGTTA	142058
AAGCGTTC	4816	4854	9670	5.01309e-06		AAGCGTTC	4459	4146	8605	2.7152e-05	5.41622	AAGCGTTC	27	32	59	1.56998e-05	3.13176	AAGCGTTC	149699	149730	299429	3.11021e-05	6.20417	AAGCGTTC	55737	55498	111235	3.63129e-05	7.24361	AAGCGTTC	79748	79540	159288	2.09928e-05	4.18759	AAGCGTTC	8235	8218	16453	1.95424e-05	3.89827	AAGCGTTC	407870	405032	812902	2.31495e-05	4.61782	AAGCGTTC	184615
AAGCGTTG	4258	4302	8560	4.43765e-06		AAGCGTTG	4216	4284	8500	2.68207e-05	6.04389	AAGCGTTG	37	47	84	2.23523e-05	5.03696	AAGCGTTG	151617	152147	303764	3.15524e-05	7.11015	AAGCGTTG	57101	57182	114283	3.73079e-05	8.40714	AAGCGTTG	96333	95862	192195	2.53296e-05	5.70789	AAGCGTTG	10139	10148	20287	2.40963e-05	5.42997	AAGCGTTG	380897	382878	763775	2.17505e-05	4.90136	AAGCGTTG	163334
AAGCGTTT	7798	7775	15573	8.07331e-06		AAGCGTTT	5815	5165	10980	3.4646e-05	4.29143	AAGCGTTT	32	57	89	2.36828e-05	2.93347	AAGCGTTT	206283	206180	412463	4.28431e-05	5.30675	AAGCGTTT	91901	91247	183148	5.97891e-05	7.40577	AAGCGTTT	82267	82102	164369	2.16624e-05	2.68321	AAGCGTTT	8870	8783	17653	2.09677e-05	2.59716	AAGCGTTT	654946	654999	1309945	3.73042e-05	4.62068	AAGCGTTT	277521
AATCGAAA	6250	6046	12296	6.37446e-06		AATCGAAA	6442	5878	12320	3.88742e-05	6.09844	AATCGAAA	30	30	60	1.59659e-05	2.50467	AATCGAAA	165550	163835	329385	3.42136e-05	5.3673	AATCGAAA	62540	61519	124059	4.04993e-05	6.35338	AATCGAAA	122493	122707	245200	3.23152e-05	5.06949	AATCGAAA	12909	12900	25809	3.06552e-05	4.80906	AATCGAAA	1416351	1415981	2832332	8.06582e-05	12.6533	AATCGAAA	452513
AATCGAAC	2902	2894	5796	3.00475e-06		AATCGAAC	4787	5140	9927	3.13234e-05	10.4246	AATCGAAC	28	28	56	1.49015e-05	4.95933	AATCGAAC	121413	118874	240287	2.49589e-05	8.3065	AATCGAAC	43662	42004	85666	2.79659e-05	9.30723	AATCGAAC	91908	91722	183630	2.42008e-05	8.05421	AATCGAAC	10175	10069	20244	2.40452e-05	8.00242	AATCGAAC	662888	663490	1326378	3.77721e-05	12.5708	AATCGAAC	252021
AATCGAAG	4917	4891	9808	5.08464e-06		AATCGAAG	5216	4312	9528	3.00644e-05	5.9128	AATCGAAG	25	28	53	1.41032e-05	2.7737	AATCGAAG	135103	135694	270797	2.8128e-05	5.53197	AATCGAAG	44680	44884	89564	2.92384e-05	5.75034	AATCGAAG	122369	121903	244272	3.21929e-05	6.33142	AATCGAAG	13318	13025	26343	3.12894e-05	6.15372	AATCGAAG	657760	656394	1314154	3.7424e-05	7.36022	AATCGAAG	241922
AATCGAAT	5793	5825	11618	6.02297e-06		AATCGAAT	4752	4931	9683	3.05535e-05	5.07283	AATCGAAT	21	25	46	1.22405e-05	2.03231	AATCGAAT	114545	114530	229075	2.37943e-05	3.95059	AATCGAAT	42217	42055	84272	2.75108e-05	4.56764	AATCGAAT	105386	106187	211573	2.78835e-05	4.62953	AATCGAAT	11150	11302	22452	2.66678e-05	4.42769	AATCGAAT	1090174	1091193	2181367	6.21202e-05	10.3139	AATCGAAT	387749
AATCGACA	3786	3846	7632	3.95656e-06		AATCGACA	4327	4249	8576	2.70605e-05	6.8394	AATCGACA	13	20	33	8.78125e-06	2.21942	AATCGACA	118286	118098	236384	2.45535e-05	6.20577	AATCGACA	42103	42314	84417	2.75581e-05	6.96517	AATCGACA	117967	118172	236139	3.11211e-05	7.86569	AATCGACA	12974	12921	25895	3.07573e-05	7.77375	AATCGACA	589121	589851	1178972	3.35744e-05	8.48574	AATCGACA	208019
AATCGACC	2125	2113	4238	2.19705e-06		AATCGACC	3367	3592	6959	2.19583e-05	9.99442	AATCGACC	11	19	30	7.98296e-06	3.63349	AATCGACC	110281	109788	220069	2.28589e-05	10.4043	AATCGACC	31919	32075	63994	2.0891e-05	9.50864	AATCGACC	96872	96957	193829	2.5545e-05	11.6269	AATCGACC	10782	10749	21531	2.55739e-05	11.6401	AATCGACC	405743	405995	811738	2.31164e-05	10.5216	AATCGACC	146917
AATCGACG	484	552	1036	5.3708e-07		AATCGACG	3918	3604	7522	2.37347e-05	44.1922	AATCGACG	17	12	29	7.71686e-06	14.3682	AATCGACG	131942	130523	262465	2.72626e-05	50.7607	AATCGACG	42383	40724	83107	2.71305e-05	50.5147	AATCGACG	97898	98176	196074	2.58409e-05	48.1136	AATCGACG	10235	10117	20352	2.41735e-05	45.0091	AATCGACG	387311	396541	783852	2.23223e-05	41.5623	AATCGACG	146901
AATCGACT	3478	3461	6939	3.5973e-06		AATCGACT	2961	3262	6223	1.96359e-05	5.45851	AATCGACT	14	14	28	7.45076e-06	2.07121	AATCGACT	82866	83407	166273	1.7271e-05	4.8011	AATCGACT	28625	28660	57285	1.87008e-05	5.19857	AATCGACT	95758	95943	191701	2.52645e-05	7.0232	AATCGACT	10189	10141	20330	2.41474e-05	6.71265	AATCGACT	554637	556134	1110771	3.16322e-05	8.79331	AATCGACT	200312
AATCGAGA	4846	4831	9677	5.01672e-06		AATCGAGA	3677	3198	6875	2.16932e-05	4.32418	AATCGAGA	22	21	43	1.14422e-05	2.28082	AATCGAGA	94309	94829	189138	1.9646e-05	3.9161	AATCGAGA	29090	29235	58325	1.90403e-05	3.79537	AATCGAGA	123237	122726	245963	3.24158e-05	6.46155	AATCGAGA	13340	13089	26429	3.13916e-05	6.25739	AATCGAGA	597455	597231	1194686	3.40219e-05	6.78169	AATCGAGA	189896
AATCGAGC	2672	2438	5110	2.64911e-06		AATCGAGC	2660	2989	5649	1.78247e-05	6.72856	AATCGAGC	16	11	27	7.18466e-06	2.7121	AATCGAGC	117697	115579	233276	2.42307e-05	9.14672	AATCGAGC	34267	32958	67225	2.19457e-05	8.28419	AATCGAGC	101607	101646	203253	2.6787e-05	10.1117	AATCGAGC	10542	10650	21192	2.51712e-05	9.50176	AATCGAGC	391138	391202	782340	2.22792e-05	8.41007	AATCGAGC	138236
AATCGAGG	4590	4688	9278	4.80987e-06		AATCGAGG	2837	2666	5503	1.7364e-05	3.61008	AATCGAGG	10	17	27	7.18466e-06	1.49373	AATCGAGG	87215	87192	174407	1.81159e-05	3.76639	AATCGAGG	22073	22227	44300	1.44618e-05	3.0067	AATCGAGG	107211	107848	215059	2.83429e-05	5.89265	AATCGAGG	11312	11234	22546	2.67795e-05	5.5676	AATCGAGG	377982	376321	754303	2.14808e-05	4.46598	AATCGAGG	135476
AATCGAGT	4112	4075	8187	4.24428e-06		AATCGAGT	2922	2894	5816	1.83517e-05	4.32386	AATCGAGT	20	74	94	2.50133e-05	5.89341	AATCGAGT	69720	69882	139602	1.45006e-05	3.41651	AATCGAGT	22638	23096	45734	1.493e-05	3.51767	AATCGAGT	91102	90960	182062	2.39942e-05	5.6533	AATCGAGT	9284	9485	18769	2.22933e-05	5.25254	AATCGAGT	503588	504241	1007829	2.87006e-05	6.76218	AATCGAGT	171941
AATCGATA	4180	4295	8475	4.39359e-06		AATCGATA	4222	4530	8752	2.76158e-05	6.28549	AATCGATA	60	22	82	2.18201e-05	4.96635	AATCGATA	128537	127802	256339	2.66263e-05	6.06026	AATCGATA	49058	48933	97991	3.19894e-05	7.28093	AATCGATA	96368	96890	193258	2.54697e-05	5.79703	AATCGATA	10519	10698	21217	2.52009e-05	5.73585	AATCGATA	1058441	1056765	2115206	6.02361e-05	13.71	AATCGATA	322899
AATCGATC	2745	2910	5655	2.93165e-06		AATCGATC	3074	3231	6305	1.98946e-05	6.78616	AATCGATC	19	45	64	1.70303e-05	5.80912	AATCGATC	131829	132012	263841	2.74055e-05	9.34815	AATCGATC	39660	39945	79605	2.59872e-05	8.86437	AATCGATC	111367	110667	222034	2.92622e-05	9.98147	AATCGATC	12101	11946	24047	2.85623e-05	9.74275	AATCGATC	684996	684624	1369620	3.90036e-05	13.3043	AATCGATC	251861
AATCGATG	4689	4513	9202	4.77047e-06		AATCGATG	4250	4018	8268	2.60886e-05	5.46877	AATCGATG	30	38	68	1.80947e-05	3.79306	AATCGATG	144641	145412	290053	3.01282e-05	6.31555	AATCGATG	46655	48049	94704	3.09163e-05	6.48077	AATCGATG	114187	114131	228318	3.00903e-05	6.30762	AATCGATG	12089	12211	24300	2.88628e-05	6.0503	AATCGATG	756797	780323	1537120	4.37736e-05	9.17594	AATCGATG	325227
AATCGATT	5079	5079	10158	5.26608e-06		AATCGATT	4357	4357	8714	2.74959e-05	5.22133	AATCGATT	38	34	72	1.91591e-05	3.63821	AATCGATT	145368	145368	290736	3.01991e-05	5.73465	AATCGATT	55956	55956	111912	3.65339e-05	6.93759	AATCGATT	99941	99941	199882	2.63427e-05	5.00234	AATCGATT	10333	10333	20666	2.45465e-05	4.66124	AATCGATT	1206012	1206012	2412024	6.86888e-05	13.0436	AATCGATT	361273
AATCGCAA	3726	3796	7522	3.89953e-06		AATCGCAA	4358	4092	8450	2.66629e-05	6.83746	AATCGCAA	47	27	74	1.96913e-05	5.04965	AATCGCAA	149586	150913	300499	3.12132e-05	8.00435	AATCGCAA	61166	62031	123197	4.02179e-05	10.3135	AATCGCAA	109875	108959	218834	2.88404e-05	7.39587	AATCGCAA	12060	11656	23716	2.81692e-05	7.22373	AATCGCAA	567669	571267	1138936	3.24342e-05	8.31746	AATCGCAA	210752
AATCGCAC	2608	2530	5138	2.66363e-06		AATCGCAC	2604	2904	5508	1.73798e-05	6.52486	AATCGCAC	22	20	42	1.11761e-05	4.19584	AATCGCAC	94525	94235	188760	1.96067e-05	7.36092	AATCGCAC	36354	36322	72676	2.37252e-05	8.90712	AATCGCAC	71753	71236	142989	1.88447e-05	7.07483	AATCGCAC	7369	7331	14700	1.74602e-05	6.55506	AATCGCAC	342326	341682	684008	1.94789e-05	7.31294	AATCGCAC	142396
AATCGCAG	4680	4525	9205	4.77203e-06		AATCGCAG	3555	3304	6859	2.16427e-05	4.53533	AATCGCAG	36	28	64	1.70303e-05	3.56878	AATCGCAG	114033	115921	229954	2.38856e-05	5.00534	AATCGCAG	40616	41850	82466	2.69212e-05	5.64146	AATCGCAG	94814	94599	189413	2.4963e-05	5.23111	AATCGCAG	10302	10390	20692	2.45773e-05	5.15029	AATCGCAG	368979	368765	737744	2.10092e-05	4.40257	AATCGCAG	153290
AATCGCAT	4136	3972	8108	4.20333e-06		AATCGCAT	3943	4065	8008	2.52682e-05	6.01149	AATCGCAT	33	30	63	1.67642e-05	3.98832	AATCGCAT	141317	138974	280291	2.91142e-05	6.92646	AATCGCAT	58962	57251	116213	3.7938e-05	9.02571	AATCGCAT	93856	94137	187993	2.47759e-05	5.89434	AATCGCAT	10670	10605	21275	2.52698e-05	6.01186	AATCGCAT	529873	528689	1058562	3.01454e-05	7.17179	AATCGCAT	204127
AATCGCCA	4247	4188	8435	4.37285e-06		AATCGCCA	3960	4686	8646	2.72814e-05	6.23881	AATCGCCA	28	20	48	1.27727e-05	2.92092	AATCGCCA	215616	212771	428387	4.44971e-05	10.1758	AATCGCCA	84759	82318	167077	5.45427e-05	12.473	AATCGCCA	109473	110204	219677	2.89515e-05	6.62075	AATCGCCA	12377	12380	24757	2.94056e-05	6.72459	AATCGCCA	412629	415832	828461	2.35926e-05	5.39525	AATCGCCA	149324
AATCGCCC	2960	2801	5761	2.9866e-06		AATCGCCC	2406	2950	5356	1.69002e-05	5.65867	AATCGCCC	19	37	56	1.49015e-05	4.98946	AATCGCCC	142941	141675	284616	2.95634e-05	9.89869	AATCGCCC	49297	47120	96417	3.14755e-05	10.5389	AATCGCCC	79660	79073	158733	2.09196e-05	7.0045	AATCGCCC	9029	9170	18199	2.16162e-05	7.23774	AATCGCCC	321310	327223	648533	1.84687e-05	6.18385	AATCGCCC	81416
AATCGCCG	724	742	1466	7.6e-07		AATCGCCG	3722	3754	7476	2.35896e-05	31.0389	AATCGCCG	31	19	50	1.33049e-05	17.5065	AATCGCCG	230888	228982	459870	4.77673e-05	62.8517	AATCGCCG	77957	75515	153472	5.01013e-05	65.9228	AATCGCCG	87394	86793	174187	2.29563e-05	30.2057	AATCGCCG	9581	9447	19028	2.26009e-05	29.738	AATCGCCG	249898	249093	498991	1.42101e-05	18.6975	AATCGCCG	92304
AATCGCCT	4212	4270	8482	4.39721e-06		AATCGCCT	2860	3616	6476	2.04342e-05	4.64708	AATCGCCT	24	25	49	1.30388e-05	2.96525	AATCGCCT	153810	152791	306601	3.1847e-05	7.24255	AATCGCCT	55133	53959	109092	3.56133e-05	8.09906	AATCGCCT	88007	87797	175804	2.31694e-05	5.26912	AATCGCCT	9887	9815	19702	2.34015e-05	5.32188	AATCGCCT	412133	414028	826161	2.35271e-05	5.35046	AATCGCCT	147465
AATCGCGA	482	476	958	4.96644e-07		AATCGCGA	2555	2440	4995	1.57611e-05	31.7352	AATCGCGA	29	26	55	1.46354e-05	29.4687	AATCGCGA	113706	113512	227218	2.36014e-05	47.5219	AATCGCGA	39158	39048	78206	2.55305e-05	51.4061	AATCGCGA	76343	76038	152381	2.00825e-05	40.4364	AATCGCGA	7926	8045	15971	1.89699e-05	38.1962	AATCGCGA	305330	306082	611412	1.74116e-05	35.0585	AATCGCGA	112721
AATCGCGC	493	445	938	4.86275e-07		AATCGCGC	2697	3209	5906	1.86356e-05	38.3232	AATCGCGC	29	19	48	1.27727e-05	26.2665	AATCGCGC	165492	161570	327062	3.39724e-05	69.8624	AATCGCGC	59844	56963	116807	3.81319e-05	78.4163	AATCGCGC	64299	64306	128605	1.6949e-05	34.8548	AATCGCGC	6543	6540	13083	1.55396e-05	31.9564	AATCGCGC	228162	227476	455638	1.29755e-05	26.6834	AATCGCGC	79500
AATCGCGG	674	666	1340	6.94679e-07		AATCGCGG	2493	2692	5185	1.63606e-05	23.5513	AATCGCGG	27	29	56	1.49015e-05	21.4509	AATCGCGG	130067	128803	258870	2.68892e-05	38.7073	AATCGCGG	41596	40715	82311	2.68706e-05	38.6806	AATCGCGG	61429	61632	123061	1.62184e-05	23.3466	AATCGCGG	6847	6804	13651	1.62143e-05	23.3406	AATCGCGG	186676	185972	372648	1.06121e-05	15.2763	AATCGCGG	76760
AATCGCGT	644	598	1242	6.43874e-07		AATCGCGT	2469	2928	5397	1.70296e-05	26.4486	AATCGCGT	23	33	56	1.49015e-05	23.1435	AATCGCGT	89774	90333	180107	1.87079e-05	29.0553	AATCGCGT	32418	32745	65163	2.12726e-05	33.0385	AATCGCGT	56224	55796	112020	1.47633e-05	22.9288	AATCGCGT	5778	5659	11437	1.35845e-05	21.0981	AATCGCGT	263365	264321	527686	1.50273e-05	23.3388	AATCGCGT	97819
AATCGCTA	3312	3255	6567	3.40445e-06		AATCGCTA	3034	3049	6083	1.91941e-05	5.63796	AATCGCTA	31	23	54	1.43693e-05	4.22075	AATCGCTA	110458	112362	222820	2.31446e-05	6.79835	AATCGCTA	49514	51473	100987	3.29674e-05	9.68364	AATCGCTA	57447	57720	115167	1.5178e-05	4.45829	AATCGCTA	6017	6034	12051	1.43138e-05	4.20445	AATCGCTA	370730	372097	742827	2.1154e-05	6.21363	AATCGCTA	147877
AATCGCTC	3228	3227	6455	3.34638e-06		AATCGCTC	2824	3208	6032	1.90332e-05	5.6877	AATCGCTC	19	33	52	1.38371e-05	4.13495	AATCGCTC	125143	125960	251103	2.60824e-05	7.79421	AATCGCTC	47619	47367	94986	3.10084e-05	9.26624	AATCGCTC	90880	91394	182274	2.40221e-05	7.17854	AATCGCTC	9725	9750	19475	2.31318e-05	6.91249	AATCGCTC	400624	402027	802651	2.28576e-05	6.83054	AATCGCTC	154945
AATCGCTG	5146	5155	10301	5.34021e-06		AATCGCTG	4103	3922	8025	2.53219e-05	4.74173	AATCGCTG	26	33	59	1.56998e-05	2.93992	AATCGCTG	189802	191649	381451	3.96218e-05	7.41952	AATCGCTG	71472	73366	144838	4.72827e-05	8.85408	AATCGCTG	92845	93539	186384	2.45638e-05	4.59978	AATCGCTG	10443	10490	20933	2.48636e-05	4.65592	AATCGCTG	433798	431453	865251	2.46403e-05	4.61411	AATCGCTG	175083
AATCGCTT	4881	4952	9833	5.0976e-06		AATCGCTT	4047	4998	9045	2.85404e-05	5.59879	AATCGCTT	37	21	58	1.54337e-05	3.02765	AATCGCTT	200332	200068	400400	4.15901e-05	8.15876	AATCGCTT	86843	87067	173910	5.67733e-05	11.1373	AATCGCTT	92234	92309	184543	2.43212e-05	4.77111	AATCGCTT	10038	10057	20095	2.38682e-05	4.68226	AATCGCTT	592028	591957	1183985	3.37171e-05	6.61432	AATCGCTT	237322
AATCGGAA	5147	5046	10193	5.28423e-06		AATCGGAA	3695	3638	7333	2.31384e-05	4.37876	AATCGGAA	37	22	59	1.56998e-05	2.97107	AATCGGAA	118159	117383	235542	2.44661e-05	4.63002	AATCGGAA	40761	40217	80978	2.64354e-05	5.00271	AATCGGAA	87408	86926	174334	2.29757e-05	4.34798	AATCGGAA	9789	9697	19486	2.31449e-05	4.38	AATCGGAA	689762	691962	1381724	3.93483e-05	7.44636	AATCGGAA	239096
AATCGGAC	2131	2083	4214	2.18461e-06		AATCGGAC	2157	2083	4240	1.33788e-05	6.12411	AATCGGAC	30	25	55	1.46354e-05	6.69933	AATCGGAC	67491	66653	134144	1.39337e-05	6.37812	AATCGGAC	22645	21804	44449	1.45105e-05	6.64213	AATCGGAC	66020	65900	131920	1.73859e-05	7.95836	AATCGGAC	7409	7352	14761	1.75327e-05	8.02554	AATCGGAC	297684	297951	595635	1.69623e-05	7.76445	AATCGGAC	113465
AATCGGAG	4068	3940	8008	4.15148e-06		AATCGGAG	2649	2268	4917	1.5515e-05	3.73721	AATCGGAG	30	35	65	1.72964e-05	4.16632	AATCGGAG	66959	68096	135055	1.40283e-05	3.37911	AATCGGAG	20135	21235	41370	1.35053e-05	3.25313	AATCGGAG	77854	77857	155711	2.05214e-05	4.94314	AATCGGAG	9248	9160	18408	2.18645e-05	5.26667	AATCGGAG	345237	345701	690938	1.96763e-05	4.73958	AATCGGAG	120481
AATCGGAT	3347	3249	6596	3.41948e-06		AATCGGAT	3094	2922	6016	1.89827e-05	5.55135	AATCGGAT	41	24	65	1.72964e-05	5.0582	AATCGGAT	99511	98344	197855	2.05515e-05	6.01011	AATCGGAT	35518	34247	69765	2.27749e-05	6.66035	AATCGGAT	78364	78608	156972	2.06876e-05	6.04991	AATCGGAT	8845	8879	17724	2.1052e-05	6.15651	AATCGGAT	462760	461140	923900	2.63105e-05	7.6943	AATCGGAT	172971
AATCGGCA	3651	3629	7280	3.77408e-06		AATCGGCA	3366	3942	7308	2.30595e-05	6.10996	AATCGGCA	16	25	41	1.091e-05	2.89078	AATCGGCA	183408	182308	365716	3.79874e-05	10.0653	AATCGGCA	63464	62058	125522	4.09769e-05	10.8575	AATCGGCA	89459	89256	178715	2.35531e-05	6.24076	AATCGGCA	10006	10060	20066	2.38338e-05	6.31513	AATCGGCA	399705	399051	798756	2.27467e-05	6.02709	AATCGGCA	148970
AATCGGCC	2739	2757	5496	2.84922e-06		AATCGGCC	2149	2455	4604	1.45273e-05	5.09871	AATCGGCC	22	24	46	1.22405e-05	4.2961	AATCGGCC	131922	132571	264493	2.74732e-05	9.64237	AATCGGCC	35873	35847	71720	2.34132e-05	8.21739	AATCGGCC	77613	78258	155871	2.05425e-05	7.20985	AATCGGCC	9037	9109	18146	2.15533e-05	7.56462	AATCGGCC	262692	260647	523339	1.49035e-05	5.23072	AATCGGCC	87794
AATCGGCG	602	558	1160	6.01364e-07		AATCGGCG	3289	3219	6508	2.05352e-05	34.1477	AATCGGCG	18	9	27	7.18466e-06	11.9473	AATCGGCG	200294	202318	402612	4.18198e-05	69.5416	AATCGGCG	64046	65401	129447	4.22583e-05	70.2707	AATCGGCG	78260	77618	155878	2.05434e-05	34.1613	AATCGGCG	8747	8547	17294	2.05413e-05	34.1579	AATCGGCG	259249	259691	518940	1.47782e-05	24.5745	AATCGGCG	90049
AATCGGCT	3353	3395	6748	3.49828e-06		AATCGGCT	2541	2864	5405	1.70548e-05	4.8752	AATCGGCT	9	13	22	5.85417e-06	1.67344	AATCGGCT	129799	128735	258534	2.68543e-05	7.67642	AATCGGCT	45268	44162	89430	2.91946e-05	8.34542	AATCGGCT	73465	73688	147153	1.93935e-05	5.54372	AATCGGCT	8319	8442	16761	1.99082e-05	5.69086	AATCGGCT	360006	359590	719596	2.04924e-05	5.85785	AATCGGCT	135534
AATCGGGA	4101	4073	8174	4.23754e-06		AATCGGGA	2136	2568	4704	1.48429e-05	3.50271	AATCGGGA	14	16	30	7.98296e-06	1.88387	AATCGGGA	91693	93026	184719	1.9187e-05	4.52786	AATCGGGA	27261	28321	55582	1.81449e-05	4.28193	AATCGGGA	72148	71056	143204	1.8873e-05	4.45377	AATCGGGA	8452	8406	16858	2.00234e-05	4.72525	AATCGGGA	345554	344411	689965	1.96486e-05	4.63679	AATCGGGA	116906
AATCGGGC	2560	2511	5071	2.62889e-06		AATCGGGC	2107	2062	4169	1.31548e-05	5.00391	AATCGGGC	16	15	31	8.24906e-06	3.13784	AATCGGGC	109629	109056	218685	2.27151e-05	8.64055	AATCGGGC	33321	32684	66005	2.15475e-05	8.19641	AATCGGGC	61330	61692	123022	1.62132e-05	6.16732	AATCGGGC	6996	6974	13970	1.65932e-05	6.31184	AATCGGGC	190271	189184	379455	1.0806e-05	4.11047	AATCGGGC	68649
AATCGGGG	4133	3956	8089	4.19348e-06		AATCGGGG	1829	1968	3797	1.1981e-05	2.85705	AATCGGGG	21	18	39	1.03778e-05	2.47476	AATCGGGG	72236	72317	144553	1.50149e-05	3.58054	AATCGGGG	20069	19992	40061	1.3078e-05	3.11865	AATCGGGG	56312	56756	113068	1.49014e-05	3.55347	AATCGGGG	7024	6888	13912	1.65243e-05	3.94047	AATCGGGG	189401	188192	377593	1.0753e-05	2.56421	AATCGGGG	60944
AATCGGGT	2861	2932	5793	3.00319e-06		AATCGGGT	2428	2737	5165	1.62975e-05	5.42673	AATCGGGT	21	35	56	1.49015e-05	4.9619	AATCGGGT	82231	81082	163313	1.69635e-05	5.6485	AATCGGGT	26626	25717	52343	1.70875e-05	5.68978	AATCGGGT	57581	57632	115213	1.51841e-05	5.05598	AATCGGGT	6430	6536	12966	1.54006e-05	5.12809	AATCGGGT	272791	272660	545451	1.55332e-05	5.17222	AATCGGGT	100794
AATCGGTA	3126	3078	6204	3.21626e-06		AATCGGTA	3533	3689	7222	2.27881e-05	7.08528	AATCGGTA	25	19	44	1.17083e-05	3.64036	AATCGGTA	109827	110092	219919	2.28433e-05	7.10243	AATCGGTA	43036	43121	86157	2.81261e-05	8.74498	AATCGGTA	61703	61851	123554	1.62833e-05	5.06282	AATCGGTA	6948	6949	13897	1.65064e-05	5.13219	AATCGGTA	417074	417095	834169	2.37552e-05	7.38596	AATCGGTA	159680
AATCGGTC	2200	2191	4391	2.27637e-06		AATCGGTC	2587	2843	5430	1.71337e-05	7.52676	AATCGGTC	12	33	45	1.19744e-05	5.26032	AATCGGTC	97087	97452	194539	2.0207e-05	8.87686	AATCGGTC	31314	31601	62915	2.05387e-05	9.02258	AATCGGTC	69589	69686	139275	1.83552e-05	8.06338	AATCGGTC	7838	7772	15610	1.85411e-05	8.14503	AATCGGTC	346936	346175	693111	1.97382e-05	8.6709	AATCGGTC	134870
AATCGGTG	3562	3664	7226	3.74608e-06		AATCGGTG	4021	3809	7830	2.47066e-05	6.59531	AATCGGTG	22	25	47	1.25066e-05	3.33859	AATCGGTG	147007	147930	294937	3.06355e-05	8.17801	AATCGGTG	52485	52172	104657	3.41655e-05	9.12033	AATCGGTG	73062	73382	146444	1.93001e-05	5.15206	AATCGGTG	8100	8320	16420	1.95032e-05	5.20629	AATCGGTG	419140	420814	839954	2.39199e-05	6.38532	AATCGGTG	173179
AATCGGTT	3623	3481	7104	3.68284e-06		AATCGGTT	3656	3789	7445	2.34918e-05	6.37872	AATCGGTT	32	35	67	1.78286e-05	4.841	AATCGGTT	125219	126056	251275	2.61003e-05	7.087	AATCGGTT	47474	47432	94906	3.09823e-05	8.41261	AATCGGTT	63571	64165	127736	1.68345e-05	4.57107	AATCGGTT	7255	7296	14551	1.72832e-05	4.69292	AATCGGTT	543837	543577	1087414	3.0967e-05	8.40847	AATCGGTT	213279
AATCGTAA	5075	5233	10308	5.34384e-06		AATCGTAA	4622	4894	9516	3.00265e-05	5.6189	AATCGTAA	47	24	71	1.8893e-05	3.53547	AATCGTAA	112978	112404	225382	2.34107e-05	4.38088	AATCGTAA	47386	47052	94438	3.08295e-05	5.76916	AATCGTAA	63317	63270	126587	1.66831e-05	3.12192	AATCGTAA	6557	6427	12984	1.5422e-05	2.88594	AATCGTAA	586949	585836	1172785	3.33982e-05	6.24984	AATCGTAA	207677
AATCGTAC	2693	2748	5441	2.82071e-06		AATCGTAC	2763	3032	5795	1.82854e-05	6.48256	AATCGTAC	27	33	60	1.59659e-05	5.66025	AATCGTAC	61668	61819	123487	1.28268e-05	4.54735	AATCGTAC	24595	24573	49168	1.6051e-05	5.69042	AATCGTAC	63875	64164	128039	1.68744e-05	5.98234	AATCGTAC	6549	6619	13168	1.56406e-05	5.54491	AATCGTAC	310934	309995	620929	1.76826e-05	6.26885	AATCGTAC	129674
AATCGTAG	3615	3561	7176	3.72016e-06		AATCGTAG	2873	3203	6076	1.91721e-05	5.15355	AATCGTAG	26	47	73	1.94252e-05	5.2216	AATCGTAG	69163	68135	137298	1.42613e-05	3.83352	AATCGTAG	25561	24705	50266	1.64094e-05	4.41095	AATCGTAG	61007	61220	122227	1.61085e-05	4.33004	AATCGTAG	6311	6245	12556	1.49136e-05	4.00887	AATCGTAG	347519	348214	695733	1.98128e-05	5.3258	AATCGTAG	137720
AATCGTAT	5659	5670	11329	5.87315e-06		AATCGTAT	4956	4713	9669	3.05093e-05	5.19471	AATCGTAT	73	26	99	2.63438e-05	4.48546	AATCGTAT	114171	113886	228057	2.36886e-05	4.03337	AATCGTAT	50224	49313	99537	3.24941e-05	5.53265	AATCGTAT	71761	71475	143236	1.88773e-05	3.21417	AATCGTAT	7697	7719	15416	1.83107e-05	3.11769	AATCGTAT	516845	515409	1032254	2.93962e-05	5.00518	AATCGTAT	192848
AATCGTCA	4323	4262	8585	4.45061e-06		AATCGTCA	4373	5275	9648	3.04431e-05	6.8402	AATCGTCA	33	27	60	1.59659e-05	3.58735	AATCGTCA	142290	140981	283271	2.94237e-05	6.61117	AATCGTCA	53547	52080	105627	3.44822e-05	7.74774	AATCGTCA	109066	109599	218665	2.88182e-05	6.4751	AATCGTCA	11961	12007	23968	2.84685e-05	6.39653	AATCGTCA	538427	537063	1075490	3.06274e-05	6.88162	AATCGTCA	197087
AATCGTCC	3043	3063	6106	3.16546e-06		AATCGTCC	2737	3525	6262	1.9759e-05	6.24206	AATCGTCC	28	47	75	1.99574e-05	6.30475	AATCGTCC	93633	94419	188052	1.95332e-05	6.17074	AATCGTCC	29275	30300	59575	1.94484e-05	6.14395	AATCGTCC	87823	87768	175591	2.31414e-05	7.3106	AATCGTCC	9920	9684	19604	2.32851e-05	7.35599	AATCGTCC	333126	333695	666821	1.89895e-05	5.99898	AATCGTCC	132675
AATCGTCG	474	556	1030	5.3397e-07		AATCGTCG	3902	4530	8432	2.66061e-05	49.827	AATCGTCG	35	56	91	2.4215e-05	45.349	AATCGTCG	147001	147883	294884	3.063e-05	57.3628	AATCGTCG	47619	48599	96218	3.14106e-05	58.8246	AATCGTCG	98569	98944	197513	2.60305e-05	48.749	AATCGTCG	10230	10392	20622	2.44942e-05	45.8719	AATCGTCG	367172	366236	733408	2.08857e-05	39.1141	AATCGTCG	131966
AATCGTCT	4540	4648	9188	4.76322e-06		AATCGTCT	3724	4642	8366	2.63979e-05	5.54202	AATCGTCT	47	11	58	1.54337e-05	3.24019	AATCGTCT	97924	98131	196055	2.03645e-05	4.27536	AATCGTCT	35368	35436	70804	2.31141e-05	4.85263	AATCGTCT	97432	97376	194808	2.5674e-05	5.39006	AATCGTCT	10187	10062	20249	2.40512e-05	5.04935	AATCGTCT	490295	490675	980970	2.79357e-05	5.86489	AATCGTCT	180471
AATCGTGA	5104	5165	10269	5.32363e-06		AATCGTGA	3673	3767	7440	2.3476e-05	4.40977	AATCGTGA	19	12	31	8.24906e-06	1.54952	AATCGTGA	98968	99105	198073	2.05741e-05	3.86468	AATCGTGA	35407	36444	71851	2.34559e-05	4.406	AATCGTGA	80976	80719	161695	2.131e-05	4.00291	AATCGTGA	8416	8429	16845	2.0008e-05	3.75834	AATCGTGA	472241	471341	943582	2.6871e-05	5.0475	AATCGTGA	180758
AATCGTGC	3348	3307	6655	3.45007e-06		AATCGTGC	2727	3222	5949	1.87713e-05	5.44086	AATCGTGC	17	26	43	1.14422e-05	3.31653	AATCGTGC	95692	95649	191341	1.98748e-05	5.76071	AATCGTGC	32483	32742	65225	2.12928e-05	6.17172	AATCGTGC	70907	71218	142125	1.87308e-05	5.42913	AATCGTGC	6932	7118	14050	1.66882e-05	4.83706	AATCGTGC	306325	306611	612936	1.7455e-05	5.05932	AATCGTGC	125543
AATCGTGG	4927	4900	9827	5.09449e-06		AATCGTGG	3158	2889	6047	1.90805e-05	3.74533	AATCGTGG	23	38	61	1.6232e-05	3.18619	AATCGTGG	89833	91619	181452	1.88477e-05	3.69962	AATCGTGG	30243	31664	61907	2.02097e-05	3.96697	AATCGTGG	79550	78728	158278	2.08597e-05	4.09456	AATCGTGG	8519	8289	16808	1.9964e-05	3.91876	AATCGTGG	310844	310548	621392	1.76958e-05	3.47352	AATCGTGG	130684
AATCGTGT	5792	5866	11658	6.04371e-06		AATCGTGT	3343	3953	7296	2.30216e-05	3.80919	AATCGTGT	51	67	118	3.13996e-05	5.19543	AATCGTGT	74921	73989	148910	1.54675e-05	2.55927	AATCGTGT	30093	29144	59237	1.9338e-05	3.1997	AATCGTGT	66878	67475	134353	1.77066e-05	2.92975	AATCGTGT	6616	6562	13178	1.56524e-05	2.58987	AATCGTGT	414985	414165	829150	2.36122e-05	3.90691	AATCGTGT	154481
AATCGTTA	4369	4609	8978	4.65435e-06		AATCGTTA	4656	4761	9417	2.97142e-05	6.38417	AATCGTTA	74	38	112	2.9803e-05	6.40327	AATCGTTA	119249	118652	237901	2.47111e-05	5.30925	AATCGTTA	53503	52639	106142	3.46503e-05	7.44471	AATCGTTA	53604	53349	106953	1.40955e-05	3.02845	AATCGTTA	5645	5561	11206	1.33102e-05	2.85972	AATCGTTA	515359	513372	1028731	2.92958e-05	6.29429	AATCGTTA	194024
AATCGTTC	4008	3899	7907	4.09912e-06		AATCGTTC	4439	4762	9201	2.90326e-05	7.08263	AATCGTTC	40	33	73	1.94252e-05	4.73887	AATCGTTC	122168	125339	247507	2.57089e-05	6.2718	AATCGTTC	47425	49446	96871	3.16237e-05	7.71476	AATCGTTC	86037	85217	171254	2.25698e-05	5.506	AATCGTTC	9333	9150	18483	2.19536e-05	5.35567	AATCGTTC	591423	590006	1181429	3.36443e-05	8.20769	AATCGTTC	253467
AATCGTTG	4014	4026	8040	4.16807e-06		AATCGTTG	5309	5454	10763	3.39613e-05	8.14796	AATCGTTG	43	126	169	4.49707e-05	10.7893	AATCGTTG	146658	147652	294310	3.05704e-05	7.33441	AATCGTTG	56018	56831	112849	3.68398e-05	8.83857	AATCGTTG	90710	90144	180854	2.3835e-05	5.71847	AATCGTTG	9520	9387	18907	2.24572e-05	5.3879	AATCGTTG	635237	633038	1268275	3.61175e-05	8.66527	AATCGTTG	247413
AATCGTTT	7967	7854	15821	8.20188e-06		AATCGTTT	6256	7236	13492	4.25723e-05	5.19056	AATCGTTT	75	39	114	3.03352e-05	3.69857	AATCGTTT	189315	186960	376275	3.90842e-05	4.76527	AATCGTTT	82950	81285	164235	5.36149e-05	6.5369	AATCGTTT	82547	82817	165364	2.17935e-05	2.65714	AATCGTTT	8696	8922	17618	2.09261e-05	2.55138	AATCGTTT	1015978	1015782	2031760	5.78598e-05	7.05445	AATCGTTT	393913
ACACGAAA	7596	7675	15271	7.91675e-06		ACACGAAA	4176	3704	7880	2.48644e-05	3.14073	ACACGAAA	40	42	82	2.18201e-05	2.75619	ACACGAAA	71555	71489	143044	1.48582e-05	1.8768	ACACGAAA	27069	26994	54063	1.7649e-05	2.22932	ACACGAAA	86357	86514	172871	2.27829e-05	2.87781	ACACGAAA	9157	9071	18228	2.16507e-05	2.73479	ACACGAAA	696176	696658	1392834	3.96646e-05	5.01022	ACACGAAA	285138
ACACGAAC	4461	4751	9212	4.77566e-06		ACACGAAC	4033	4214	8247	2.60224e-05	5.44896	ACACGAAC	44	28	72	1.91591e-05	4.01182	ACACGAAC	77015	78098	155113	1.61118e-05	3.37373	ACACGAAC	23714	23966	47680	1.55652e-05	3.25929	ACACGAAC	82640	82343	164983	2.17433e-05	4.55295	ACACGAAC	7842	8010	15852	1.88285e-05	3.94261	ACACGAAC	343264	342960	686224	1.9542e-05	4.09201	ACACGAAC	148165
ACACGAAG	7552	7606	15158	7.85817e-06		ACACGAAG	3827	3379	7206	2.27376e-05	2.8935	ACACGAAG	52	39	91	2.4215e-05	3.0815	ACACGAAG	75737	76928	152665	1.58575e-05	2.01797	ACACGAAG	21276	22000	43276	1.41275e-05	1.79782	ACACGAAG	91965	91036	183001	2.41179e-05	3.06916	ACACGAAG	9252	9014	18266	2.16958e-05	2.76093	ACACGAAG	362683	363735	726418	2.06867e-05	2.63251	ACACGAAG	154847
ACACGAAT	6377	6374	12751	6.61034e-06		ACACGAAT	3296	3440	6736	2.12546e-05	3.21536	ACACGAAT	31	38	69	1.83608e-05	2.77759	ACACGAAT	58558	60369	118927	1.23531e-05	1.86876	ACACGAAT	22504	24362	46866	1.52995e-05	2.31448	ACACGAAT	71950	72048	143998	1.89777e-05	2.87091	ACACGAAT	7420	7299	14719	1.74828e-05	2.64477	ACACGAAT	505451	507989	1013440	2.88604e-05	4.36595	ACACGAAT	196140
ACACGACA	5277	5213	10490	5.4382e-06		ACACGACA	3305	3076	6381	2.01344e-05	3.70241	ACACGACA	35	39	74	1.96913e-05	3.62092	ACACGACA	49553	49615	99168	1.03007e-05	1.89414	ACACGACA	16158	15955	32113	1.04834e-05	1.92773	ACACGACA	97558	97076	194634	2.56511e-05	4.71684	ACACGACA	9351	9457	18808	2.23396e-05	4.1079	ACACGACA	319720	320657	640377	1.82364e-05	3.3534	ACACGACA	131127
ACACGACC	3691	3490	7181	3.72275e-06		ACACGACC	3716	4272	7988	2.52051e-05	6.77056	ACACGACC	38	34	72	1.91591e-05	5.14649	ACACGACC	87070	86781	173851	1.80581e-05	4.85075	ACACGACC	23216	23321	46537	1.51921e-05	4.08088	ACACGACC	92268	91512	183780	2.42206e-05	6.5061	ACACGACC	8955	8784	17739	2.10699e-05	5.65975	ACACGACC	217187	216015	433202	1.23366e-05	3.31383	ACACGACC	94609
ACACGACG	1072	1136	2208	1.14467e-06		ACACGACG	4229	4387	8616	2.71867e-05	23.7508	ACACGACG	47	23	70	1.86269e-05	16.2728	ACACGACG	98308	100008	198316	2.05993e-05	17.996	ACACGACG	27346	28988	56334	1.83904e-05	16.0661	ACACGACG	90977	90928	181905	2.39735e-05	20.9437	ACACGACG	7999	8012	16011	1.90174e-05	16.6139	ACACGACG	201963	203213	405176	1.15385e-05	10.0802	ACACGACG	79477
ACACGACT	4267	4293	8560	4.43765e-06		ACACGACT	2205	2080	4285	1.35208e-05	3.04683	ACACGACT	30	24	54	1.43693e-05	3.23805	ACACGACT	37741	36078	73819	7.66767e-06	1.72787	ACACGACT	13722	12251	25973	8.47894e-06	1.91068	ACACGACT	72001	72043	144044	1.89838e-05	4.27788	ACACGACT	6976	6900	13876	1.64815e-05	3.71402	ACACGACT	257927	258197	516124	1.4698e-05	3.31211	ACACGACT	107938
ACACGAGA	6127	6319	12446	6.45222e-06		ACACGAGA	2782	2834	5616	1.77206e-05	2.74643	ACACGAGA	23	52	75	1.99574e-05	3.09311	ACACGAGA	40722	39958	80680	8.38034e-06	1.29883	ACACGAGA	13673	13217	26890	8.7783e-06	1.36051	ACACGAGA	90711	90574	181285	2.38918e-05	3.70288	ACACGAGA	9059	8999	18058	2.14488e-05	3.32425	ACACGAGA	322819	322093	644912	1.83656e-05	2.8464	ACACGAGA	124613
ACACGAGC	4363	4448	8811	4.56777e-06		ACACGAGC	3047	3299	6346	2.0024e-05	4.38376	ACACGAGC	44	38	82	2.18201e-05	4.77696	ACACGAGC	74662	75888	150550	1.56378e-05	3.42351	ACACGAGC	21916	23043	44959	1.4677e-05	3.21315	ACACGAGC	95004	95631	190635	2.5124e-05	5.50028	ACACGAGC	8525	8440	16965	2.01505e-05	4.41146	ACACGAGC	213458	213603	427061	1.21617e-05	2.6625	ACACGAGC	92439
ACACGAGG	7234	7432	14666	7.60311e-06		ACACGAGG	2504	2577	5081	1.60325e-05	2.10867	ACACGAGG	31	25	56	1.49015e-05	1.95993	ACACGAGG	46815	46288	93103	9.67073e-06	1.27194	ACACGAGG	12484	11914	24398	7.96478e-06	1.04757	ACACGAGG	81760	81435	163195	2.15077e-05	2.8288	ACACGAGG	7742	7861	15603	1.85328e-05	2.43753	ACACGAGG	219557	219284	438841	1.24972e-05	1.64369	ACACGAGG	97950
ACACGAGT	5002	5069	10071	5.22098e-06		ACACGAGT	2326	2531	4857	1.53257e-05	2.9354	ACACGAGT	27	48	75	1.99574e-05	3.82254	ACACGAGT	30968	31429	62397	6.48126e-06	1.24139	ACACGAGT	10482	10973	21455	7.00403e-06	1.34152	ACACGAGT	62066	62634	124700	1.64344e-05	3.14776	ACACGAGT	5885	6015	11900	1.41345e-05	2.70725	ACACGAGT	243775	245035	488810	1.39202e-05	2.6662	ACACGAGT	101738
ACACGATA	4157	4209	8366	4.33708e-06		ACACGATA	3190	3558	6748	2.12925e-05	4.9094	ACACGATA	64	40	104	2.76743e-05	6.38085	ACACGATA	56941	56733	113674	1.18075e-05	2.72245	ACACGATA	22099	21733	43832	1.43091e-05	3.29924	ACACGATA	68394	68439	136833	1.80334e-05	4.15796	ACACGATA	7376	7457	14833	1.76182e-05	4.06223	ACACGATA	317766	318203	635969	1.81109e-05	4.17583	ACACGATA	128252
ACACGATC	3843	3837	7680	3.98144e-06		ACACGATC	5233	4719	9952	3.14023e-05	7.88716	ACACGATC	33	53	86	2.28845e-05	5.74779	ACACGATC	129627	130171	259798	2.69856e-05	6.77783	ACACGATC	35864	36788	72652	2.37174e-05	5.95699	ACACGATC	94541	94331	188872	2.48917e-05	6.25193	ACACGATC	9253	9141	18394	2.18479e-05	5.48742	ACACGATC	290940	291720	582660	1.65928e-05	4.16753	ACACGATC	114185
ACACGATG	6793	6929	13722	7.11372e-06		ACACGATG	4765	4104	8869	2.7985e-05	3.93395	ACACGATG	49	51	100	2.66099e-05	3.74064	ACACGATG	110356	109019	219375	2.27868e-05	3.20321	ACACGATG	33966	32456	66422	2.16836e-05	3.04814	ACACGATG	98625	98747	197372	2.60119e-05	3.65659	ACACGATG	9734	9617	19351	2.29845e-05	3.23102	ACACGATG	318418	321673	640091	1.82283e-05	2.56241	ACACGATG	127171
ACACGATT	5866	5792	11658	6.04371e-06		ACACGATT	3953	3343	7296	2.30216e-05	3.80919	ACACGATT	38	54	92	2.44811e-05	4.05067	ACACGATT	73989	74921	148910	1.54675e-05	2.55927	ACACGATT	29144	30093	59237	1.9338e-05	3.1997	ACACGATT	67475	66878	134353	1.77066e-05	2.92975	ACACGATT	6562	6616	13178	1.56524e-05	2.58987	ACACGATT	414165	414985	829150	2.36122e-05	3.90691	ACACGATT	154492
ACACGCAA	5539	5807	11346	5.88196e-06		ACACGCAA	3280	3141	6421	2.02607e-05	3.44454	ACACGCAA	46	56	102	2.71421e-05	4.61446	ACACGCAA	64645	63620	128265	1.33231e-05	2.26507	ACACGCAA	23146	22454	45600	1.48862e-05	2.53083	ACACGCAA	81409	81161	162570	2.14253e-05	3.64255	ACACGCAA	7973	7986	15959	1.89556e-05	3.22267	ACACGCAA	372488	372523	745011	2.12162e-05	3.60699	ACACGCAA	141860
ACACGCAC	8209	8081	16290	8.44502e-06		ACACGCAC	3341	3351	6692	2.11158e-05	2.50038	ACACGCAC	63	56	119	3.16657e-05	3.74964	ACACGCAC	69960	70236	140196	1.45623e-05	1.72437	ACACGCAC	20412	20812	41224	1.34577e-05	1.59356	ACACGCAC	86298	86201	172499	2.27339e-05	2.69199	ACACGCAC	7194	7169	14363	1.70599e-05	2.02012	ACACGCAC	351521	351611	703132	2.00235e-05	2.37105	ACACGCAC	164210
ACACGCAG	10096	10001	20097	1.04186e-05		ACACGCAG	3380	2923	6303	1.98883e-05	1.90892	ACACGCAG	68	41	109	2.90048e-05	2.78393	ACACGCAG	88350	87461	175811	1.82617e-05	1.75279	ACACGCAG	25542	24836	50378	1.6446e-05	1.57852	ACACGCAG	83215	83006	166221	2.19065e-05	2.10263	ACACGCAG	8002	7910	15912	1.88998e-05	1.81404	ACACGCAG	237968	237670	475638	1.35451e-05	1.30008	ACACGCAG	97733
ACACGCAT	6915	6980	13895	7.20341e-06		ACACGCAT	2730	2977	5707	1.80077e-05	2.49989	ACACGCAT	45	40	85	2.26184e-05	3.13996	ACACGCAT	61120	62109	123229	1.28e-05	1.77693	ACACGCAT	21982	22819	44801	1.46254e-05	2.03034	ACACGCAT	70752	70707	141459	1.86431e-05	2.58809	ACACGCAT	6865	6941	13806	1.63984e-05	2.27647	ACACGCAT	327870	327872	655742	1.8674e-05	2.59238	ACACGCAT	142303
ACACGCCA	6262	6514	12776	6.6233e-06		ACACGCCA	3258	3642	6900	2.17721e-05	3.2872	ACACGCCA	42	55	97	2.58116e-05	3.89709	ACACGCCA	88697	89701	178398	1.85304e-05	2.79777	ACACGCCA	28921	30285	59206	1.93279e-05	2.91817	ACACGCCA	88199	88128	176327	2.32384e-05	3.50858	ACACGCCA	8743	8774	17517	2.08062e-05	3.14136	ACACGCCA	210902	211550	422452	1.20304e-05	1.81638	ACACGCCA	85921
ACACGCCC	6532	6762	13294	6.89184e-06		ACACGCCC	3195	3584	6779	2.13903e-05	3.10371	ACACGCCC	76	41	117	3.11335e-05	4.51745	ACACGCCC	122957	120550	243507	2.52934e-05	3.67005	ACACGCCC	32090	31167	63257	2.06504e-05	2.99635	ACACGCCC	85573	85788	171361	2.25839e-05	3.27691	ACACGCCC	7745	8074	15819	1.87893e-05	2.72632	ACACGCCC	144650	143889	288539	8.21691e-06	1.19227	ACACGCCC	52438
ACACGCCG	1638	1677	3315	1.71855e-06		ACACGCCG	4427	4288	8715	2.74991e-05	16.0013	ACACGCCG	70	23	93	2.47472e-05	14.4	ACACGCCG	200434	199523	399957	4.15441e-05	24.1739	ACACGCCG	53671	53657	107328	3.50375e-05	20.3878	ACACGCCG	80466	80255	160721	2.11816e-05	12.3253	ACACGCCG	7234	7374	14608	1.7351e-05	10.0963	ACACGCCG	155614	145393	301007	8.57197e-06	4.9879	ACACGCCG	48903
ACACGCCT	6201	5870	12071	6.25781e-06		ACACGCCT	2298	2399	4697	1.48208e-05	2.36837	ACACGCCT	28	45	73	1.94252e-05	3.10415	ACACGCCT	62406	63732	126138	1.31021e-05	2.09372	ACACGCCT	19967	20691	40658	1.32729e-05	2.12101	ACACGCCT	70345	70768	141113	1.85975e-05	2.97188	ACACGCCT	6738	6642	13380	1.58924e-05	2.5396	ACACGCCT	192904	192156	385060	1.09656e-05	1.75231	ACACGCCT	78358
ACACGCGA	974	977	1951	1.01143e-06		ACACGCGA	2307	2444	4751	1.49912e-05	14.8217	ACACGCGA	37	122	159	4.23097e-05	41.8315	ACACGCGA	52066	52360	104426	1.08469e-05	10.7243	ACACGCGA	15722	16047	31769	1.03711e-05	10.2538	ACACGCGA	61310	61773	123083	1.62213e-05	16.0379	ACACGCGA	5793	5860	11653	1.38411e-05	13.6846	ACACGCGA	192270	190919	383189	1.09123e-05	10.789	ACACGCGA	72021
ACACGCGC	1857	1993	3850	1.99591e-06		ACACGCGC	3941	4161	8102	2.55648e-05	12.8086	ACACGCGC	86	60	146	3.88504e-05	19.465	ACACGCGC	126022	125831	251853	2.61603e-05	13.107	ACACGCGC	36331	35415	71746	2.34216e-05	11.7348	ACACGCGC	73589	72888	146477	1.93044e-05	9.672	ACACGCGC	6027	5936	11963	1.42093e-05	7.11922	ACACGCGC	185297	185410	370707	1.05569e-05	5.28926	ACACGCGC	74395
ACACGCGG	2058	2162	4220	2.18772e-06		ACACGCGG	2613	2897	5510	1.73861e-05	7.94714	ACACGCGG	60	49	109	2.90048e-05	13.258	ACACGCGG	85617	86424	172041	1.78701e-05	8.16838	ACACGCGG	23990	24102	48092	1.56997e-05	7.1763	ACACGCGG	50500	50623	101123	1.33271e-05	6.09179	ACACGCGG	4800	4957	9757	1.15891e-05	5.29733	ACACGCGG	121147	121456	242603	6.90876e-06	3.15797	ACACGCGG	46264
ACACGCGT	1747	1720	3467	1.79735e-06		ACACGCGT	1857	1897	3754	1.18453e-05	6.5904	ACACGCGT	35	34	69	1.83608e-05	10.2155	ACACGCGT	43583	43777	87360	9.0742e-06	5.04865	ACACGCGT	14130	14031	28161	9.19322e-06	5.11487	ACACGCGT	44811	45592	90403	1.19143e-05	6.62883	ACACGCGT	3701	3828	7529	8.94272e-06	4.9755	ACACGCGT	173489	174203	347692	9.90145e-06	5.50891	ACACGCGT	70964
ACACGCTA	3847	3831	7678	3.98041e-06		ACACGCTA	1964	1682	3646	1.15045e-05	2.89028	ACACGCTA	53	60	113	3.00691e-05	7.55429	ACACGCTA	37886	36270	74156	7.70268e-06	1.93515	ACACGCTA	15328	14259	29587	9.65874e-06	2.42657	ACACGCTA	43202	42657	85859	1.13155e-05	2.84279	ACACGCTA	4364	4181	8545	1.01495e-05	2.54986	ACACGCTA	180643	181086	361729	1.03012e-05	2.58797	ACACGCTA	74966
ACACGCTC	6108	6028	12136	6.29151e-06		ACACGCTC	4152	4289	8441	2.66345e-05	4.23341	ACACGCTC	64	83	147	3.91165e-05	6.21735	ACACGCTC	124303	124823	249126	2.5877e-05	4.11301	ACACGCTC	35966	35187	71153	2.32281e-05	3.69197	ACACGCTC	99946	100164	200110	2.63728e-05	4.1918	ACACGCTC	8859	8728	17587	2.08893e-05	3.32024	ACACGCTC	218428	218111	436539	1.24316e-05	1.97593	ACACGCTC	87050
ACACGCTG	8972	8981	17953	9.30714e-06		ACACGCTG	5134	4398	9532	3.0077e-05	3.23161	ACACGCTG	63	49	112	2.9803e-05	3.20217	ACACGCTG	189746	191530	381276	3.96036e-05	4.25519	ACACGCTG	53275	54613	107888	3.52203e-05	3.78422	ACACGCTG	88651	88512	177163	2.33486e-05	2.50867	ACACGCTG	8682	8619	17301	2.05496e-05	2.20794	ACACGCTG	236242	235206	471448	1.34257e-05	1.44252	ACACGCTG	97989
ACACGCTT	5878	6109	11987	6.21427e-06		ACACGCTT	3205	3526	6731	2.12388e-05	3.41775	ACACGCTT	44	99	143	3.80521e-05	6.12335	ACACGCTT	83209	82710	165919	1.72342e-05	2.77333	ACACGCTT	31295	30754	62049	2.0256e-05	3.2596	ACACGCTT	76199	76207	152406	2.00858e-05	3.23221	ACACGCTT	7471	7483	14954	1.77619e-05	2.85825	ACACGCTT	272307	273107	545414	1.55321e-05	2.49943	ACACGCTT	119362
ACACGGAA	8563	8609	17172	8.90226e-06		ACACGGAA	3179	3326	6505	2.05257e-05	2.30567	ACACGGAA	89	64	153	4.07131e-05	4.57334	ACACGGAA	62789	61975	124764	1.29594e-05	1.45574	ACACGGAA	20353	19273	39626	1.2936e-05	1.45311	ACACGGAA	75922	76686	152608	2.01124e-05	2.25925	ACACGGAA	8372	8388	16760	1.9907e-05	2.23618	ACACGGAA	378991	379818	758809	2.16091e-05	2.42737	ACACGGAA	164519
ACACGGAC	5485	5672	11157	5.78398e-06		ACACGGAC	3121	3011	6132	1.93488e-05	3.34523	ACACGGAC	53	56	109	2.90048e-05	5.01467	ACACGGAC	55883	55986	111869	1.162e-05	2.00899	ACACGGAC	14003	14074	28077	9.1658e-06	1.58469	ACACGGAC	77699	77839	155538	2.04986e-05	3.54402	ACACGGAC	7626	7793	15419	1.83142e-05	3.16637	ACACGGAC	207773	209529	417302	1.18838e-05	2.0546	ACACGGAC	82407
ACACGGAG	9998	10132	20130	1.04357e-05		ACACGGAG	2657	2305	4962	1.5657e-05	1.50032	ACACGGAG	65	38	103	2.74082e-05	2.62638	ACACGGAG	46377	46285	92662	9.62492e-06	0.922304	ACACGGAG	11449	11025	22474	7.33669e-06	0.703035	ACACGGAG	78306	78782	157088	2.07028e-05	1.98384	ACACGGAG	8447	8577	17024	2.02206e-05	1.93763	ACACGGAG	222164	221405	443569	1.26318e-05	1.21044	ACACGGAG	91860
ACACGGAT	5972	6163	12135	6.29099e-06		ACACGGAT	2811	2596	5407	1.70611e-05	2.71199	ACACGGAT	21	50	71	1.8893e-05	3.00318	ACACGGAT	58974	59956	118930	1.23534e-05	1.96367	ACACGGAT	18587	19871	38458	1.25547e-05	1.99566	ACACGGAT	66661	66869	133530	1.75981e-05	2.79735	ACACGGAT	7218	7335	14553	1.72856e-05	2.74768	ACACGGAT	263015	263810	526825	1.50027e-05	2.3848	ACACGGAT	112726
ACACGGCA	8248	8262	16510	8.55907e-06		ACACGGCA	3033	2990	6023	1.90048e-05	2.22043	ACACGGCA	42	89	131	3.48589e-05	4.07275	ACACGGCA	84624	82267	166891	1.73352e-05	2.02536	ACACGGCA	25169	23600	48769	1.59207e-05	1.8601	ACACGGCA	90982	91298	182280	2.40229e-05	2.80672	ACACGGCA	8887	8949	17836	2.11851e-05	2.47516	ACACGGCA	211276	209400	420676	1.19799e-05	1.39967	ACACGGCA	91231
ACACGGCC	7641	7726	15367	7.96652e-06		ACACGGCC	3758	3790	7548	2.38168e-05	2.98961	ACACGGCC	94	67	161	4.28419e-05	5.37774	ACACGGCC	127025	127794	254819	2.64684e-05	3.32245	ACACGGCC	27804	28013	55817	1.82216e-05	2.28727	ACACGGCC	98241	98347	196588	2.59086e-05	3.25219	ACACGGCC	9662	9708	19370	2.30071e-05	2.88798	ACACGGCC	149733	149326	299059	8.5165e-06	1.06904	ACACGGCC	60417
ACACGGCG	2054	2008	4062	2.10581e-06		ACACGGCG	4444	4011	8455	2.66787e-05	12.6691	ACACGGCG	67	29	96	2.55455e-05	12.1309	ACACGGCG	160266	161742	322008	3.34474e-05	15.8834	ACACGGCG	43125	44435	87560	2.85842e-05	13.5739	ACACGGCG	90537	90699	181236	2.38853e-05	11.3426	ACACGGCG	8520	8614	17134	2.03513e-05	9.66434	ACACGGCG	141684	142617	284301	8.09623e-06	3.84471	ACACGGCG	53302
ACACGGCT	7080	7041	14121	7.32057e-06		ACACGGCT	2396	2283	4679	1.4764e-05	2.01678	ACACGGCT	24	38	62	1.64981e-05	2.25367	ACACGGCT	64139	63846	127985	1.3294e-05	1.81597	ACACGGCT	19385	18454	37839	1.23526e-05	1.68739	ACACGGCT	72500	72497	144997	1.91094e-05	2.61036	ACACGGCT	7467	7394	14861	1.76515e-05	2.41121	ACACGGCT	199922	199067	398989	1.13623e-05	1.5521	ACACGGCT	88052
ACACGGGA	7455	7439	14894	7.7213e-06		ACACGGGA	2083	1976	4059	1.28077e-05	1.65874	ACACGGGA	43	47	90	2.39489e-05	3.10166	ACACGGGA	42692	42354	85046	8.83384e-06	1.14409	ACACGGGA	11411	10831	22242	7.26095e-06	0.940379	ACACGGGA	60342	60605	120947	1.59398e-05	2.06439	ACACGGGA	6552	6657	13209	1.56893e-05	2.03194	ACACGGGA	203400	200481	403881	1.15016e-05	1.48959	ACACGGGA	82922
ACACGGGC	7056	7086	14142	7.33146e-06		ACACGGGC	3460	3284	6744	2.12798e-05	2.90254	ACACGGGC	49	49	98	2.60777e-05	3.55696	ACACGGGC	88009	90875	178884	1.85809e-05	2.53441	ACACGGGC	21479	23761	45240	1.47687e-05	2.01443	ACACGGGC	77362	77449	154811	2.04028e-05	2.78291	ACACGGGC	7167	7361	14528	1.72559e-05	2.35368	ACACGGGC	124702	124149	248851	7.08669e-06	0.966615	ACACGGGC	50288
ACACGGGG	8760	8756	17516	9.08059e-06		ACACGGGG	1903	1794	3697	1.16654e-05	1.28465	ACACGGGG	57	29	86	2.28845e-05	2.52015	ACACGGGG	42010	42575	84585	8.78595e-06	0.967553	ACACGGGG	9964	9909	19873	6.48758e-06	0.714445	ACACGGGG	49876	49816	99692	1.31385e-05	1.44688	ACACGGGG	5424	5363	10787	1.28125e-05	1.41097	ACACGGGG	117699	115742	233441	6.64785e-06	0.732094	ACACGGGG	46448
ACACGGGT	5366	5270	10636	5.51388e-06		ACACGGGT	2250	2117	4367	1.37795e-05	2.49906	ACACGGGT	39	36	75	1.99574e-05	3.61948	ACACGGGT	45817	45437	91254	9.47867e-06	1.71905	ACACGGGT	13482	13321	26803	8.7499e-06	1.58688	ACACGGGT	47612	47334	94946	1.25131e-05	2.26937	ACACGGGT	4879	4834	9713	1.15368e-05	2.09232	ACACGGGT	159879	159493	319372	9.09496e-06	1.64947	ACACGGGT	69975
ACACGGTA	5034	5130	10164	5.26919e-06		ACACGGTA	2720	2414	5134	1.61997e-05	3.07442	ACACGGTA	47	48	95	2.52794e-05	4.79758	ACACGGTA	50311	51481	101792	1.05733e-05	2.00662	ACACGGTA	17308	18032	35340	1.15368e-05	2.18949	ACACGGTA	52107	52364	104471	1.37684e-05	2.613	ACACGGTA	5477	5472	10949	1.30049e-05	2.4681	ACACGGTA	202292	204425	406717	1.15823e-05	2.19813	ACACGGTA	90902
ACACGGTC	4867	4922	9789	5.07479e-06		ACACGGTC	3933	4062	7995	2.52272e-05	4.97109	ACACGGTC	50	56	106	2.82065e-05	5.55816	ACACGGTC	107791	105696	213487	2.21752e-05	4.36968	ACACGGTC	28789	27611	56400	1.84119e-05	3.62811	ACACGGTC	81177	81566	162743	2.14481e-05	4.22641	ACACGGTC	8142	8093	16235	1.92835e-05	3.79986	ACACGGTC	188447	189881	378328	1.07739e-05	2.12302	ACACGGTC	84051
ACACGGTG	9210	8787	17997	9.32995e-06		ACACGGTG	4431	4066	8497	2.68112e-05	2.87367	ACACGGTG	57	35	92	2.44811e-05	2.62392	ACACGGTG	129205	129681	258886	2.68908e-05	2.8822	ACACGGTG	36516	36952	73468	2.39838e-05	2.57062	ACACGGTG	71627	71577	143204	1.8873e-05	2.02285	ACACGGTG	7033	7018	14051	1.66894e-05	1.78879	ACACGGTG	224509	224721	449230	1.2793e-05	1.37118	ACACGGTG	93187
ACACGGTT	5514	5411	10925	5.66371e-06		ACACGGTT	3356	3417	6773	2.13714e-05	3.77339	ACACGGTT	34	35	69	1.83608e-05	3.24184	ACACGGTT	68217	71548	139765	1.45176e-05	2.56326	ACACGGTT	23553	26463	50016	1.63278e-05	2.88289	ACACGGTT	54892	55194	110086	1.45084e-05	2.56164	ACACGGTT	6129	6165	12294	1.46025e-05	2.57825	ACACGGTT	263074	272720	535794	1.52582e-05	2.69402	ACACGGTT	121738
ACACGTAA	7500	7585	15085	7.82032e-06		ACACGTAA	2731	2953	5684	1.79351e-05	2.2934	ACACGTAA	43	56	99	2.63438e-05	3.36863	ACACGTAA	41411	41179	82590	8.57873e-06	1.09698	ACACGTAA	17942	17843	35785	1.16821e-05	1.49381	ACACGTAA	36172	36801	72973	9.61721e-06	1.22977	ACACGTAA	3679	3716	7395	8.78356e-06	1.12317	ACACGTAA	314889	313901	628790	1.79065e-05	2.28973	ACACGTAA	138440
ACACGTAC	5220	5196	10416	5.39983e-06		ACACGTAC	3415	3205	6620	2.08886e-05	3.86838	ACACGTAC	66	29	95	2.52794e-05	4.68151	ACACGTAC	46074	47357	93431	9.7048e-06	1.79724	ACACGTAC	13962	15492	29454	9.61532e-06	1.78067	ACACGTAC	69402	69636	139038	1.8324e-05	3.39344	ACACGTAC	5875	5938	11813	1.40311e-05	2.59844	ACACGTAC	235819	236349	472168	1.34462e-05	2.49012	ACACGTAC	108780
ACACGTAG	6021	6071	12092	6.2687e-06		ACACGTAG	1933	2438	4371	1.37921e-05	2.20016	ACACGTAG	58	51	109	2.90048e-05	4.62692	ACACGTAG	34928	35660	70588	7.33207e-06	1.16963	ACACGTAG	10868	11587	22455	7.33048e-06	1.16938	ACACGTAG	38953	39163	78116	1.0295e-05	1.64229	ACACGTAG	3612	3677	7289	8.65766e-06	1.38109	ACACGTAG	195225	196524	391749	1.11561e-05	1.77965	ACACGTAG	84408
ACACGTAT	8104	8088	16192	8.39421e-06		ACACGTAT	2951	2565	5516	1.7405e-05	2.07346	ACACGTAT	36	40	76	2.02235e-05	2.40922	ACACGTAT	38945	40029	78974	8.20313e-06	0.977237	ACACGTAT	15316	16576	31892	1.04112e-05	1.24028	ACACGTAT	49505	49470	98975	1.3044e-05	1.55393	ACACGTAT	4865	4897	9762	1.1595e-05	1.38131	ACACGTAT	288670	288649	577319	1.64407e-05	1.95857	ACACGTAT	123255
ACACGTCA	6523	6409	12932	6.70417e-06		ACACGTCA	2680	2834	5514	1.73987e-05	2.59521	ACACGTCA	42	38	80	2.12879e-05	3.17532	ACACGTCA	46794	46945	93739	9.73679e-06	1.45235	ACACGTCA	15807	15988	31795	1.03795e-05	1.54822	ACACGTCA	67625	67716	135341	1.78368e-05	2.66055	ACACGTCA	6501	6604	13105	1.55657e-05	2.3218	ACACGTCA	294033	294572	588605	1.67621e-05	2.50025	ACACGTCA	127697
ACACGTCC	5861	5689	11550	5.98772e-06		ACACGTCC	2837	3541	6378	2.0125e-05	3.36104	ACACGTCC	39	35	74	1.96913e-05	3.28861	ACACGTCC	69972	70071	140043	1.45464e-05	2.42938	ACACGTCC	18315	18024	36339	1.18629e-05	1.98121	ACACGTCC	74356	73822	148178	1.95286e-05	3.26144	ACACGTCC	6956	6875	13831	1.64281e-05	2.74363	ACACGTCC	193609	193280	386889	1.10177e-05	1.84005	ACACGTCC	91290
ACACGTCG	1093	1123	2216	1.14881e-06		ACACGTCG	3913	4175	8088	2.55207e-05	22.2148	ACACGTCG	44	34	78	2.07557e-05	18.0671	ACACGTCG	105044	104236	209280	2.17382e-05	18.9223	ACACGTCG	30066	28802	58868	1.92176e-05	16.7282	ACACGTCG	76950	76448	153398	2.02165e-05	17.5978	ACACGTCG	6642	6602	13244	1.57308e-05	13.6931	ACACGTCG	187558	188251	375809	1.07022e-05	9.31585	ACACGTCG	72995
ACACGTCT	7479	7542	15021	7.78714e-06		ACACGTCT	2351	2455	4806	1.51647e-05	1.94741	ACACGTCT	27	31	58	1.54337e-05	1.98195	ACACGTCT	35248	35168	70416	7.3142e-06	0.939266	ACACGTCT	12490	12113	24603	8.0317e-06	1.03141	ACACGTCT	69118	68769	137887	1.81723e-05	2.33363	ACACGTCT	6402	6547	12949	1.53804e-05	1.97511	ACACGTCT	249955	249219	499174	1.42153e-05	1.82548	ACACGTCT	109035
ACACGTGA	9747	9711	19458	1.00874e-05		ACACGTGA	2124	2081	4205	1.32683e-05	1.31534	ACACGTGA	25	54	79	2.10218e-05	2.08397	ACACGTGA	39869	38897	78766	8.18153e-06	0.811067	ACACGTGA	15506	14659	30165	9.84743e-06	0.976215	ACACGTGA	55180	55157	110337	1.45415e-05	1.44155	ACACGTGA	5381	5301	10682	1.26878e-05	1.25779	ACACGTGA	322476	322515	644991	1.83678e-05	1.82088	ACACGTGA	154775
ACACGTGC	9325	9215	18540	9.61145e-06		ACACGTGC	2298	2547	4845	1.52878e-05	1.59058	ACACGTGC	40	58	98	2.60777e-05	2.71319	ACACGTGC	54344	54701	109045	1.13266e-05	1.17845	ACACGTGC	18190	17976	36166	1.18065e-05	1.22837	ACACGTGC	53928	53776	107704	1.41945e-05	1.47683	ACACGTGC	4211	4446	8657	1.02825e-05	1.06982	ACACGTGC	233119	231316	464435	1.3226e-05	1.37607	ACACGTGC	109216
ACACGTGG	12387	12471	24858	1.28868e-05		ACACGTGG	2951	2204	5155	1.6266e-05	1.26222	ACACGTGG	43	46	89	2.36828e-05	1.83775	ACACGTGG	48686	47654	96340	1.0007e-05	0.776527	ACACGTGG	15258	14129	29387	9.59345e-06	0.744439	ACACGTGG	48030	47844	95874	1.26354e-05	0.980488	ACACGTGG	4348	4323	8671	1.02992e-05	0.799201	ACACGTGG	217699	216965	434664	1.23782e-05	0.960533	ACACGTGG	104062
ACACGTGT	11589	11589	23178	1.20159e-05		ACACGTGT	2317	2317	4634	1.4622e-05	1.21689	ACACGTGT	46	38	84	2.23523e-05	1.86023	ACACGTGT	28524	28524	57048	5.92565e-06	0.493152	ACACGTGT	10542	10542	21084	6.88292e-06	0.572819	ACACGTGT	40987	40987	81974	1.08035e-05	0.899099	ACACGTGT	3370	3370	6740	8.00557e-06	0.66625	ACACGTGT	294373	294373	588746	1.67661e-05	1.39533	ACACGTGT	128622
ACACGTTA	6566	6814	13380	6.93642e-06		ACACGTTA	2652	2401	5053	1.59441e-05	2.29861	ACACGTTA	61	36	97	2.58116e-05	3.72116	ACACGTTA	36085	36535	72620	7.54313e-06	1.08747	ACACGTTA	15080	15370	30450	9.94047e-06	1.43308	ACACGTTA	35496	35545	71041	9.36259e-06	1.34977	ACACGTTA	3644	3643	7287	8.65528e-06	1.2478	ACACGTTA	269991	270589	540580	1.53944e-05	2.21936	ACACGTTA	118264
ACACGTTC	6760	6891	13651	7.07691e-06		ACACGTTC	5337	4709	10046	3.16989e-05	4.4792	ACACGTTC	47	60	107	2.84726e-05	4.0233	ACACGTTC	95912	95365	191277	1.98682e-05	2.80747	ACACGTTC	32047	31362	63409	2.07e-05	2.92501	ACACGTTC	76922	77109	154031	2.03e-05	2.86848	ACACGTTC	7213	7146	14359	1.70552e-05	2.40998	ACACGTTC	316924	317110	634034	1.80558e-05	2.55137	ACACGTTC	143030
ACACGTTG	6545	6611	13156	6.8203e-06		ACACGTTG	4359	4537	8896	2.80702e-05	4.11569	ACACGTTG	40	58	98	2.60777e-05	3.82354	ACACGTTG	82464	82183	164647	1.71021e-05	2.50753	ACACGTTG	29627	28570	58197	1.89985e-05	2.78559	ACACGTTG	71097	71341	142438	1.87721e-05	2.75239	ACACGTTG	6709	6611	13320	1.58211e-05	2.31971	ACACGTTG	303115	303668	606783	1.72798e-05	2.53358	ACACGTTG	127925
ACACGTTT	11722	11789	23511	1.21885e-05		ACACGTTT	4489	4770	9259	2.92156e-05	2.39698	ACACGTTT	80	33	113	3.00691e-05	2.46701	ACACGTTT	73475	74184	147659	1.53375e-05	1.25836	ACACGTTT	30876	31414	62290	2.03347e-05	1.66835	ACACGTTT	63423	63266	126689	1.66965e-05	1.36986	ACACGTTT	6221	6296	12517	1.48673e-05	1.21978	ACACGTTT	544242	544584	1088826	3.10072e-05	2.54397	ACACGTTT	228714
ACCCGAAA	4407	4396	8803	4.56363e-06		ACCCGAAA	3878	3424	7302	2.30405e-05	5.04874	ACCCGAAA	62	24	86	2.28845e-05	5.01454	ACCCGAAA	106644	106250	212894	2.21136e-05	4.84561	ACCCGAAA	34751	34188	68939	2.25053e-05	4.93145	ACCCGAAA	82040	81810	163850	2.1594e-05	4.73177	ACCCGAAA	9380	9359	18739	2.22576e-05	4.87718	ACCCGAAA	468157	467939	936096	2.66578e-05	5.84137	ACCCGAAA	166256
ACCCGAAC	2558	2690	5248	2.72065e-06		ACCCGAAC	5532	3967	9499	2.99729e-05	11.0168	ACCCGAAC	32	25	57	1.51676e-05	5.57499	ACCCGAAC	120297	120537	240834	2.50157e-05	9.19475	ACCCGAAC	32636	33192	65828	2.14897e-05	7.89873	ACCCGAAC	80584	80826	161410	2.12724e-05	7.81887	ACCCGAAC	8502	8402	16904	2.00781e-05	7.37987	ACCCGAAC	225327	224970	450297	1.28234e-05	4.71335	ACCCGAAC	84748
ACCCGAAG	4994	5039	10033	5.20128e-06		ACCCGAAG	4349	3868	8217	2.59277e-05	4.98487	ACCCGAAG	28	20	48	1.27727e-05	2.45569	ACCCGAAG	115760	113997	229757	2.38652e-05	4.58832	ACCCGAAG	29834	28665	58499	1.90971e-05	3.67162	ACCCGAAG	88826	88640	177466	2.33885e-05	4.49668	ACCCGAAG	9492	9564	19056	2.26342e-05	4.35165	ACCCGAAG	246691	245742	492433	1.40233e-05	2.69613	ACCCGAAG	109366
ACCCGAAT	3343	3256	6599	3.42103e-06		ACCCGAAT	2851	2441	5292	1.66982e-05	4.88105	ACCCGAAT	20	24	44	1.17083e-05	3.42246	ACCCGAAT	75653	77246	152899	1.58818e-05	4.6424	ACCCGAAT	24465	25461	49926	1.62985e-05	4.76419	ACCCGAAT	68804	68448	137252	1.80886e-05	5.28747	ACCCGAAT	7582	7802	15384	1.82727e-05	5.34127	ACCCGAAT	292303	294225	586528	1.67029e-05	4.88242	ACCCGAAT	109545
ACCCGACA	3419	3349	6768	3.50865e-06		ACCCGACA	2870	3253	6123	1.93204e-05	5.5065	ACCCGACA	32	23	55	1.46354e-05	4.17124	ACCCGACA	77715	77635	155350	1.61364e-05	4.59904	ACCCGACA	23224	22578	45802	1.49522e-05	4.26152	ACCCGACA	77398	77293	154691	2.03869e-05	5.81048	ACCCGACA	8333	8195	16528	1.96315e-05	5.59517	ACCCGACA	194313	194652	388965	1.10768e-05	3.157	ACCCGACA	76290
ACCCGACC	3240	3501	6741	3.49465e-06		ACCCGACC	4097	3419	7516	2.37158e-05	6.78631	ACCCGACC	28	27	55	1.46354e-05	4.18795	ACCCGACC	126184	126453	252637	2.62417e-05	7.50912	ACCCGACC	31100	31213	62313	2.03422e-05	5.82096	ACCCGACC	81836	82265	164101	2.16271e-05	6.18863	ACCCGACC	7751	8156	15907	1.88939e-05	5.40651	ACCCGACC	197157	196837	393994	1.122e-05	3.21063	ACCCGACC	80723
ACCCGACG	991	1064	2055	1.06535e-06		ACCCGACG	4374	3946	8320	2.62527e-05	24.6424	ACCCGACG	31	16	47	1.25066e-05	11.7395	ACCCGACG	127769	126323	254092	2.63929e-05	24.774	ACCCGACG	34984	33425	68409	2.23323e-05	20.9624	ACCCGACG	75783	75965	151748	1.99991e-05	18.7724	ACCCGACG	7523	7389	14912	1.7712e-05	16.6256	ACCCGACG	125468	125030	250498	7.13359e-06	6.69603	ACCCGACG	48277
ACCCGACT	3132	3329	6461	3.34949e-06		ACCCGACT	2501	2122	4623	1.45873e-05	4.35508	ACCCGACT	20	29	49	1.30388e-05	3.89278	ACCCGACT	54992	53394	108386	1.12582e-05	3.36116	ACCCGACT	16820	15255	32075	1.0471e-05	3.12613	ACCCGACT	66002	66216	132218	1.74252e-05	5.20234	ACCCGACT	6932	6962	13894	1.65029e-05	4.92698	ACCCGACT	191543	191982	383525	1.09219e-05	3.26076	ACCCGACT	79287
ACCCGAGA	5507	5442	10949	5.67615e-06		ACCCGAGA	2345	2571	4916	1.55118e-05	2.73281	ACCCGAGA	33	37	70	1.86269e-05	3.28161	ACCCGAGA	54902	54842	109744	1.13993e-05	2.00827	ACCCGAGA	14175	13968	28143	9.18734e-06	1.61859	ACCCGAGA	83813	83664	167477	2.2072e-05	3.88856	ACCCGAGA	8987	8930	17917	2.12813e-05	3.74925	ACCCGAGA	197618	197894	395512	1.12633e-05	1.98431	ACCCGAGA	71148
ACCCGAGC	4214	4395	8609	4.46305e-06		ACCCGAGC	3144	3129	6273	1.97937e-05	4.43501	ACCCGAGC	47	49	96	2.55455e-05	5.72377	ACCCGAGC	100583	99291	199874	2.07612e-05	4.65179	ACCCGAGC	24866	23352	48218	1.57409e-05	3.52693	ACCCGAGC	83377	83523	166900	2.1996e-05	4.92846	ACCCGAGC	8086	8069	16155	1.91884e-05	4.2994	ACCCGAGC	148014	148827	296841	8.45333e-06	1.89407	ACCCGAGC	56132
ACCCGAGG	7029	7114	14143	7.33197e-06		ACCCGAGG	3078	2922	6000	1.89322e-05	2.58215	ACCCGAGG	64	17	81	2.1554e-05	2.93973	ACCCGAGG	74054	73311	147365	1.5307e-05	2.0877	ACCCGAGG	16137	16223	32360	1.0564e-05	1.44081	ACCCGAGG	74145	74262	148407	1.95588e-05	2.6676	ACCCGAGG	7483	7512	14995	1.78106e-05	2.42917	ACCCGAGG	162833	162347	325180	9.26036e-06	1.26301	ACCCGAGG	58725
ACCCGAGT	4262	4537	8799	4.56155e-06		ACCCGAGT	1889	1918	3807	1.20125e-05	2.63343	ACCCGAGT	41	20	61	1.6232e-05	3.55844	ACCCGAGT	41761	40502	82263	8.54476e-06	1.87321	ACCCGAGT	11938	11348	23286	7.60177e-06	1.66649	ACCCGAGT	63258	63648	126906	1.67251e-05	3.66654	ACCCGAGT	6340	6423	12763	1.51595e-05	3.32332	ACCCGAGT	164571	165980	330551	9.41332e-06	2.06362	ACCCGAGT	66014
ACCCGATA	2146	2070	4216	2.18565e-06		ACCCGATA	2043	2458	4501	1.42023e-05	6.498	ACCCGATA	24	18	42	1.11761e-05	5.11343	ACCCGATA	68517	67048	135565	1.40813e-05	6.44263	ACCCGATA	22068	21184	43252	1.41197e-05	6.4602	ACCCGATA	51831	51721	103552	1.36473e-05	6.24404	ACCCGATA	6304	6130	12434	1.47687e-05	6.75715	ACCCGATA	209167	208871	418038	1.19047e-05	5.44678	ACCCGATA	72424
ACCCGATC	2088	2190	4278	2.21779e-06		ACCCGATC	4060	3164	7224	2.27944e-05	10.278	ACCCGATC	25	17	42	1.11761e-05	5.03932	ACCCGATC	145487	144149	289636	3.00849e-05	13.5653	ACCCGATC	35906	35631	71537	2.33534e-05	10.53	ACCCGATC	78218	78926	157144	2.07102e-05	9.33823	ACCCGATC	8543	8682	17225	2.04593e-05	9.22511	ACCCGATC	202756	203095	405851	1.15577e-05	5.21136	ACCCGATC	71396
ACCCGATG	3253	3218	6471	3.35468e-06		ACCCGATG	3851	3371	7222	2.27881e-05	6.79294	ACCCGATG	18	21	39	1.03778e-05	3.09355	ACCCGATG	126820	127010	253830	2.63657e-05	7.85937	ACCCGATG	35397	35682	71079	2.32039e-05	6.91688	ACCCGATG	75144	75142	150286	1.98064e-05	5.90411	ACCCGATG	8257	8193	16450	1.95388e-05	5.82435	ACCCGATG	196594	195594	392188	1.11686e-05	3.32926	ACCCGATG	83638
ACCCGATT	2932	2861	5793	3.00319e-06		ACCCGATT	2737	2428	5165	1.62975e-05	5.42673	ACCCGATT	18	30	48	1.27727e-05	4.25306	ACCCGATT	81082	82231	163313	1.69635e-05	5.6485	ACCCGATT	25717	26626	52343	1.70875e-05	5.68978	ACCCGATT	57632	57581	115213	1.51841e-05	5.05598	ACCCGATT	6536	6430	12966	1.54006e-05	5.12809	ACCCGATT	272660	272791	545451	1.55332e-05	5.17222	ACCCGATT	99737
ACCCGCAA	3438	3542	6980	3.61855e-06		ACCCGCAA	4333	3736	8069	2.54607e-05	7.03616	ACCCGCAA	28	39	67	1.78286e-05	4.927	ACCCGCAA	158874	157187	316061	3.28297e-05	9.0726	ACCCGCAA	50072	48079	98151	3.20416e-05	8.85482	ACCCGCAA	87781	88196	175977	2.31922e-05	6.40926	ACCCGCAA	9870	9824	19694	2.3392e-05	6.46445	ACCCGCAA	203385	202451	405836	1.15573e-05	3.19389	ACCCGCAA	83676
ACCCGCAC	4557	4746	9303	4.82283e-06		ACCCGCAC	4461	3904	8365	2.63947e-05	5.47286	ACCCGCAC	67	53	120	3.19318e-05	6.62097	ACCCGCAC	196893	195575	392468	4.07662e-05	8.45274	ACCCGCAC	52024	51101	103125	3.36654e-05	6.98041	ACCCGCAC	77314	78050	155364	2.04756e-05	4.24556	ACCCGCAC	7296	7317	14613	1.73569e-05	3.5989	ACCCGCAC	154091	155373	309464	8.81281e-06	1.82731	ACCCGCAC	59031
ACCCGCAG	7565	7421	14986	7.769e-06		ACCCGCAG	4672	4231	8903	2.80923e-05	3.61595	ACCCGCAG	62	28	90	2.39489e-05	3.08262	ACCCGCAG	220785	220315	441100	4.58176e-05	5.89749	ACCCGCAG	61218	61286	122504	3.99917e-05	5.1476	ACCCGCAG	85413	85959	171372	2.25853e-05	2.90711	ACCCGCAG	9223	9131	18354	2.18003e-05	2.80607	ACCCGCAG	154036	154127	308163	8.77576e-06	1.12959	ACCCGCAG	59182
ACCCGCAT	3725	3650	7375	3.82333e-06		ACCCGCAT	3452	3002	6454	2.03648e-05	5.32646	ACCCGCAT	43	48	91	2.4215e-05	6.33348	ACCCGCAT	141862	140383	282245	2.93172e-05	7.66797	ACCCGCAT	41707	40840	82547	2.69476e-05	7.04822	ACCCGCAT	68791	68946	137737	1.81525e-05	4.74784	ACCCGCAT	7496	7567	15063	1.78914e-05	4.67953	ACCCGCAT	185025	184832	369857	1.05327e-05	2.75484	ACCCGCAT	76102
ACCCGCCA	5667	5459	11126	5.76791e-06		ACCCGCCA	3614	4480	8094	2.55396e-05	4.42788	ACCCGCCA	45	131	176	4.68334e-05	8.11964	ACCCGCCA	166971	167185	334156	3.47092e-05	6.01764	ACCCGCCA	49977	50226	100203	3.27115e-05	5.67129	ACCCGCCA	98008	97595	195603	2.57788e-05	4.46935	ACCCGCCA	10735	10714	21449	2.54765e-05	4.41694	ACCCGCCA	152681	151281	303962	8.65612e-06	1.50074	ACCCGCCA	59763
ACCCGCCC	8357	8505	16862	8.74155e-06		ACCCGCCC	3180	3541	6721	2.12073e-05	2.42603	ACCCGCCC	64	67	131	3.48589e-05	3.98773	ACCCGCCC	161900	161713	323613	3.36141e-05	3.84533	ACCCGCCC	36642	36232	72874	2.37899e-05	2.72147	ACCCGCCC	85934	86444	172378	2.27179e-05	2.59884	ACCCGCCC	8454	8609	17063	2.02669e-05	2.31846	ACCCGCCC	124608	125399	250007	7.11961e-06	0.814457	ACCCGCCC	44412
ACCCGCCG	2695	2530	5225	2.70873e-06		ACCCGCCG	4917	5795	10712	3.38004e-05	12.4783	ACCCGCCG	67	32	99	2.63438e-05	9.72551	ACCCGCCG	267442	266695	534137	5.54815e-05	20.4825	ACCCGCCG	69003	67906	136909	4.46942e-05	16.5001	ACCCGCCG	87359	87966	175325	2.31063e-05	8.53032	ACCCGCCG	8898	8824	17722	2.10497e-05	7.77105	ACCCGCCG	100270	100139	200409	5.70718e-06	2.10696	ACCCGCCG	34473
ACCCGCCT	6296	6379	12675	6.57094e-06		ACCCGCCT	2641	2358	4999	1.57737e-05	2.40053	ACCCGCCT	33	35	68	1.80947e-05	2.75375	ACCCGCCT	118238	117479	235717	2.44842e-05	3.72614	ACCCGCCT	30771	30373	61144	1.99606e-05	3.03771	ACCCGCCT	76161	76634	152795	2.01371e-05	3.06456	ACCCGCCT	8044	7890	15934	1.89259e-05	2.88025	ACCCGCCT	141464	142521	283985	8.08723e-06	1.23076	ACCCGCCT	54321
ACCCGCGA	1205	1174	2379	1.23331e-06		ACCCGCGA	3914	3369	7283	2.29806e-05	18.6332	ACCCGCGA	40	104	144	3.83182e-05	31.0693	ACCCGCGA	182133	183790	365923	3.80089e-05	30.8185	ACCCGCGA	49619	51421	101040	3.29847e-05	26.7448	ACCCGCGA	68076	68180	136256	1.79574e-05	14.5602	ACCCGCGA	7132	7364	14496	1.72179e-05	13.9607	ACCCGCGA	121541	122643	244184	6.95379e-06	5.63829	ACCCGCGA	44362
ACCCGCGC	2504	2547	5051	2.61852e-06		ACCCGCGC	5527	4703	10230	3.22795e-05	12.3274	ACCCGCGC	86	57	143	3.80521e-05	14.5319	ACCCGCGC	293027	292675	585702	6.08376e-05	23.2335	ACCCGCGC	74728	74918	149646	4.88523e-05	18.6564	ACCCGCGC	77176	77716	154892	2.04134e-05	7.79577	ACCCGCGC	7128	7290	14418	1.71253e-05	6.54005	ACCCGCGC	95848	96412	192260	5.47511e-06	2.09092	ACCCGCGC	32329
ACCCGCGG	2659	2766	5425	2.81241e-06		ACCCGCGG	2326	2559	4885	1.5414e-05	5.4807	ACCCGCGG	46	48	94	2.50133e-05	8.89388	ACCCGCGG	149121	150281	299402	3.10993e-05	11.0579	ACCCGCGG	38698	39139	77837	2.54101e-05	9.03497	ACCCGCGG	57093	56670	113763	1.4993e-05	5.331	ACCCGCGG	5841	6015	11856	1.40822e-05	5.00716	ACCCGCGG	90993	91262	182255	5.19019e-06	1.84546	ACCCGCGG	37515
ACCCGCGT	1365	1351	2716	1.40802e-06		ACCCGCGT	2869	2661	5530	1.74492e-05	12.3927	ACCCGCGT	46	25	71	1.8893e-05	13.4181	ACCCGCGT	116469	115678	232147	2.41134e-05	17.1257	ACCCGCGT	32796	31974	64770	2.11443e-05	15.017	ACCCGCGT	46781	47151	93932	1.23794e-05	8.79207	ACCCGCGT	4592	4732	9324	1.10748e-05	7.86549	ACCCGCGT	103219	103382	206601	5.88351e-06	4.17857	ACCCGCGT	43251
ACCCGCTA	2555	2610	5165	2.67762e-06		ACCCGCTA	2131	1747	3878	1.22365e-05	4.56992	ACCCGCTA	25	43	68	1.80947e-05	6.75775	ACCCGCTA	69944	69368	139312	1.44705e-05	5.40424	ACCCGCTA	24033	24473	48506	1.58349e-05	5.91378	ACCCGCTA	43144	43429	86573	1.14096e-05	4.26108	ACCCGCTA	4828	4866	9694	1.15142e-05	4.30017	ACCCGCTA	116039	115638	231677	6.59762e-06	2.46398	ACCCGCTA	48136
ACCCGCTC	5475	5574	11049	5.72799e-06		ACCCGCTC	3831	3668	7499	2.36622e-05	4.13097	ACCCGCTC	40	38	78	2.07557e-05	3.62356	ACCCGCTC	192829	192061	384890	3.9979e-05	6.97959	ACCCGCTC	44250	44535	88785	2.89841e-05	5.06007	ACCCGCTC	94050	94635	188685	2.48671e-05	4.34132	ACCCGCTC	9438	9303	18741	2.226e-05	3.88618	ACCCGCTC	154940	154990	309930	8.82608e-06	1.54087	ACCCGCTC	56421
ACCCGCTG	6893	6827	13720	7.11268e-06		ACCCGCTG	5251	4154	9405	2.96763e-05	4.17231	ACCCGCTG	59	67	126	3.35284e-05	4.71389	ACCCGCTG	237086	236123	473209	4.91528e-05	6.91059	ACCCGCTG	66221	65097	131318	4.2869e-05	6.02713	ACCCGCTG	85475	85275	170750	2.25034e-05	3.16384	ACCCGCTG	9201	9374	18575	2.20628e-05	3.1019	ACCCGCTG	175607	173179	348786	9.93261e-06	1.39646	ACCCGCTG	64541
ACCCGCTT	4502	4483	8985	4.65798e-06		ACCCGCTT	2978	3451	6429	2.02859e-05	4.35509	ACCCGCTT	50	52	102	2.71421e-05	5.827	ACCCGCTT	144983	146064	291047	3.02314e-05	6.49025	ACCCGCTT	42638	44600	87238	2.8479e-05	6.11403	ACCCGCTT	72157	72059	144216	1.90064e-05	4.0804	ACCCGCTT	7794	7951	15745	1.87014e-05	4.01493	ACCCGCTT	176660	177177	353837	1.00764e-05	2.16327	ACCCGCTT	75730
ACCCGGAA	5477	5503	10980	5.69222e-06		ACCCGGAA	3585	3389	6974	2.20056e-05	3.8659	ACCCGGAA	41	46	87	2.31506e-05	4.06706	ACCCGGAA	142020	144388	286408	2.97496e-05	5.22636	ACCCGGAA	39961	41526	81487	2.66016e-05	4.67333	ACCCGGAA	75385	75190	150575	1.98445e-05	3.48625	ACCCGGAA	8978	8730	17708	2.1033e-05	3.69505	ACCCGGAA	232143	231271	463414	1.31969e-05	2.31842	ACCCGGAA	98327
ACCCGGAC	3602	3677	7279	3.77356e-06		ACCCGGAC	5024	3876	8900	2.80828e-05	7.442	ACCCGGAC	39	77	116	3.08674e-05	8.17993	ACCCGGAC	173292	172381	345673	3.59055e-05	9.51502	ACCCGGAC	38956	38457	77413	2.52716e-05	6.69703	ACCCGGAC	77382	77063	154445	2.03545e-05	5.39398	ACCCGGAC	7696	7711	15407	1.83e-05	4.84953	ACCCGGAC	135257	135590	270847	7.71309e-06	2.04398	ACCCGGAC	49164
ACCCGGAG	6827	6830	13657	7.08002e-06		ACCCGGAG	4021	3055	7076	2.23274e-05	3.15358	ACCCGGAG	47	28	75	1.99574e-05	2.81883	ACCCGGAG	124493	122081	246574	2.5612e-05	3.6175	ACCCGGAG	27917	25810	53727	1.75393e-05	2.47729	ACCCGGAG	77800	76970	154770	2.03973e-05	2.88097	ACCCGGAG	8708	8573	17281	2.05259e-05	2.89912	ACCCGGAG	150837	150120	300957	8.57055e-06	1.21053	ACCCGGAG	60653
ACCCGGAT	3202	3256	6458	3.34794e-06		ACCCGGAT	3479	2776	6255	1.97369e-05	5.89523	ACCCGGAT	23	30	53	1.41032e-05	4.21251	ACCCGGAT	143473	143407	286880	2.97986e-05	8.90058	ACCCGGAT	37864	37822	75686	2.47079e-05	7.38002	ACCCGGAT	66609	66725	133334	1.75723e-05	5.24868	ACCCGGAT	7640	7527	15167	1.80149e-05	5.3809	ACCCGGAT	175297	175360	350657	9.98589e-06	2.9827	ACCCGGAT	65594
ACCCGGCA	5787	5577	11364	5.89129e-06		ACCCGGCA	3614	4080	7694	2.42775e-05	4.1209	ACCCGGCA	48	117	165	4.39063e-05	7.45274	ACCCGGCA	171986	171889	343875	3.57187e-05	6.06297	ACCCGGCA	48000	48067	96067	3.13613e-05	5.32333	ACCCGGCA	71503	71443	142946	1.8839e-05	3.19778	ACCCGGCA	7612	7577	15189	1.8041e-05	3.06232	ACCCGGCA	123378	123718	247096	7.03671e-06	1.19443	ACCCGGCA	48905
ACCCGGCC	8260	7800	16060	8.32578e-06		ACCCGGCC	4996	4434	9430	2.97552e-05	3.57386	ACCCGGCC	76	105	181	4.81639e-05	5.78491	ACCCGGCC	293525	293888	587413	6.10153e-05	7.32848	ACCCGGCC	61449	61095	122544	4.00048e-05	4.80493	ACCCGGCC	87315	86808	174123	2.29479e-05	2.75625	ACCCGGCC	9109	8940	18049	2.14381e-05	2.5749	ACCCGGCC	122225	120810	243035	6.92107e-06	0.831281	ACCCGGCC	39446
ACCCGGCG	2480	2448	4928	2.55476e-06		ACCCGGCG	5629	5581	11210	3.53717e-05	13.8454	ACCCGGCG	69	71	140	3.72538e-05	14.5821	ACCCGGCG	313793	313312	627105	6.51382e-05	25.4968	ACCCGGCG	78268	78647	156915	5.12252e-05	20.0509	ACCCGGCG	73711	73766	147477	1.94362e-05	7.60784	ACCCGGCG	7638	7405	15043	1.78676e-05	6.99386	ACCCGGCG	99053	99119	198172	5.64347e-06	2.209	ACCCGGCG	29342
ACCCGGCT	5967	5849	11816	6.12562e-06		ACCCGGCT	3359	2992	6351	2.00398e-05	3.27147	ACCCGGCT	34	34	68	1.80947e-05	2.95394	ACCCGGCT	153407	152505	305912	3.17755e-05	5.18731	ACCCGGCT	38653	38181	76834	2.50826e-05	4.09471	ACCCGGCT	65705	65601	131306	1.7305e-05	2.82502	ACCCGGCT	7054	7282	14336	1.70279e-05	2.77978	ACCCGGCT	136525	136165	272690	7.76557e-06	1.26772	ACCCGGCT	57165
ACCCGGGA	7517	7435	14952	7.75137e-06		ACCCGGGA	1660	1608	3268	1.03118e-05	1.33031	ACCCGGGA	37	80	117	3.11335e-05	4.01652	ACCCGGGA	85001	84101	169102	1.75648e-05	2.26603	ACCCGGGA	19764	18685	38449	1.25518e-05	1.6193	ACCCGGGA	54412	54486	108898	1.43518e-05	1.85152	ACCCGGGA	6363	6467	12830	1.52391e-05	1.96599	ACCCGGGA	129509	128794	258303	7.35586e-06	0.948975	ACCCGGGA	53663
ACCCGGGC	7323	7249	14572	7.55437e-06		ACCCGGGC	2941	2317	5258	1.6591e-05	2.19621	ACCCGGGC	93	85	178	4.73656e-05	6.26995	ACCCGGGC	184727	184135	368862	3.83142e-05	5.07179	ACCCGGGC	39473	39646	79119	2.58286e-05	3.41902	ACCCGGGC	61541	61219	122760	1.61787e-05	2.14163	ACCCGGGC	6021	6040	12061	1.43257e-05	1.89635	ACCCGGGC	95851	97184	193035	5.49718e-06	0.727682	ACCCGGGC	36658
ACCCGGGG	7835	8104	15939	8.26305e-06		ACCCGGGG	1733	1808	3541	1.11732e-05	1.35219	ACCCGGGG	71	49	120	3.19318e-05	3.86441	ACCCGGGG	78152	78168	156320	1.62372e-05	1.96503	ACCCGGGG	15595	15646	31241	1.01987e-05	1.23425	ACCCGGGG	47006	46965	93971	1.23846e-05	1.49879	ACCCGGGG	5437	5516	10953	1.30097e-05	1.57444	ACCCGGGG	96834	96925	193759	5.5178e-06	0.667768	ACCCGGGG	41887
ACCCGGGT	4755	4755	9510	4.93015e-06		ACCCGGGT	1629	1629	3258	1.02802e-05	2.08517	ACCCGGGT	49	20	69	1.83608e-05	3.72419	ACCCGGGT	98060	98060	196120	2.03712e-05	4.13197	ACCCGGGT	23983	23983	47966	1.56586e-05	3.17609	ACCCGGGT	44512	44512	89024	1.17326e-05	2.37977	ACCCGGGT	4763	4763	9526	1.13147e-05	2.295	ACCCGGGT	122366	122366	244732	6.96939e-06	1.41363	ACCCGGGT	49059
ACCCGGTA	2248	2196	4444	2.30385e-06		ACCCGGTA	2409	2747	5156	1.62691e-05	7.06172	ACCCGGTA	28	20	48	1.27727e-05	5.54409	ACCCGGTA	86106	85841	171947	1.78604e-05	7.75241	ACCCGGTA	25657	25819	51476	1.68045e-05	7.29409	ACCCGGTA	43521	43051	86572	1.14094e-05	4.95235	ACCCGGTA	5035	4917	9952	1.18207e-05	5.13085	ACCCGGTA	122831	123251	246082	7.00784e-06	3.0418	ACCCGGTA	54143
ACCCGGTC	3120	3391	6511	3.37541e-06		ACCCGGTC	3514	3382	6896	2.17595e-05	6.44646	ACCCGGTC	36	87	123	3.27301e-05	9.69663	ACCCGGTC	184282	181286	365568	3.7972e-05	11.2496	ACCCGGTC	40977	38971	79948	2.60992e-05	7.73215	ACCCGGTC	67494	67887	135381	1.7842e-05	5.28588	ACCCGGTC	7303	7396	14699	1.7459e-05	5.17241	ACCCGGTC	130963	130878	261841	7.45662e-06	2.2091	ACCCGGTC	54285
ACCCGGTG	5180	4769	9949	5.15773e-06		ACCCGGTG	4254	3482	7736	2.441e-05	4.7327	ACCCGGTG	34	19	53	1.41032e-05	2.73439	ACCCGGTG	176102	177229	353331	3.67009e-05	7.11571	ACCCGGTG	43428	44583	88011	2.87314e-05	5.57055	ACCCGGTG	60515	60659	121174	1.59697e-05	3.09626	ACCCGGTG	6706	6659	13365	1.58746e-05	3.07782	ACCCGGTG	152406	153445	305851	8.70992e-06	1.68871	ACCCGGTG	64413
ACCCGGTT	3098	3017	6115	3.17012e-06		ACCCGGTT	2975	2576	5551	1.75155e-05	5.52518	ACCCGGTT	20	19	39	1.03778e-05	3.27364	ACCCGGTT	111619	113672	225291	2.34013e-05	7.38182	ACCCGGTT	31301	32988	64289	2.09873e-05	6.62034	ACCCGGTT	49499	49392	98891	1.3033e-05	4.11119	ACCCGGTT	6027	5939	11966	1.42129e-05	4.48338	ACCCGGTT	189506	188959	378465	1.07778e-05	3.39981	ACCCGGTT	84294
ACCCGTAA	2967	3043	6010	3.11569e-06		ACCCGTAA	2129	2554	4683	1.47766e-05	4.74265	ACCCGTAA	25	36	61	1.6232e-05	5.20977	ACCCGTAA	58690	59149	117839	1.22401e-05	3.92854	ACCCGTAA	20033	20790	40823	1.33268e-05	4.27731	ACCCGTAA	36987	37182	74169	9.77483e-06	3.1373	ACCCGTAA	4168	4162	8330	9.89413e-06	3.17558	ACCCGTAA	183584	184953	368537	1.04951e-05	3.36846	ACCCGTAA	78856
ACCCGTAC	1810	1747	3557	1.84401e-06		ACCCGTAC	3266	2795	6061	1.91247e-05	10.3713	ACCCGTAC	30	13	43	1.14422e-05	6.20509	ACCCGTAC	80435	79772	160207	1.66409e-05	9.02431	ACCCGTAC	24019	23189	47208	1.54112e-05	8.35741	ACCCGTAC	57476	57298	114774	1.51262e-05	8.2029	ACCCGTAC	5629	5544	11173	1.3271e-05	7.1968	ACCCGTAC	133027	132798	265825	7.57007e-06	4.10522	ACCCGTAC	56714
ACCCGTAG	2388	2381	4769	2.47233e-06		ACCCGTAG	1681	2122	3803	1.19999e-05	4.85367	ACCCGTAG	14	15	29	7.71686e-06	3.12129	ACCCGTAG	41678	42069	83747	8.69891e-06	3.5185	ACCCGTAG	11852	12515	24367	7.95466e-06	3.21747	ACCCGTAG	38664	38943	77607	1.02279e-05	4.13696	ACCCGTAG	4205	4226	8431	1.00141e-05	4.05047	ACCCGTAG	125723	125731	251454	7.16082e-06	2.89638	ACCCGTAG	52915
ACCCGTAT	2728	2758	5486	2.84404e-06		ACCCGTAT	2655	2247	4902	1.54676e-05	5.43862	ACCCGTAT	10	30	40	1.06439e-05	3.74255	ACCCGTAT	63778	64628	128406	1.33377e-05	4.68971	ACCCGTAT	21473	22298	43771	1.42891e-05	5.02425	ACCCGTAT	47057	46948	94005	1.2389e-05	4.35615	ACCCGTAT	5441	5541	10982	1.30441e-05	4.58647	ACCCGTAT	176221	174996	351217	1.00018e-05	3.51677	ACCCGTAT	74873
ACCCGTCA	3681	3689	7370	3.82073e-06		ACCCGTCA	3038	3690	6728	2.12294e-05	5.55636	ACCCGTCA	23	28	51	1.3571e-05	3.55194	ACCCGTCA	85762	85493	171255	1.77885e-05	4.65577	ACCCGTCA	25702	26817	52519	1.71449e-05	4.48734	ACCCGTCA	80999	81146	162145	2.13693e-05	5.59298	ACCCGTCA	8947	8981	17928	2.12944e-05	5.57337	ACCCGTCA	195480	194104	389584	1.10944e-05	2.90374	ACCCGTCA	86553
ACCCGTCC	4058	4167	8225	4.26398e-06		ACCCGTCC	2813	2703	5516	1.7405e-05	4.08188	ACCCGTCC	43	38	81	2.1554e-05	5.0549	ACCCGTCC	100603	100791	201394	2.09191e-05	4.90599	ACCCGTCC	24732	24844	49576	1.61842e-05	3.79556	ACCCGTCC	80808	80842	161650	2.13041e-05	4.99629	ACCCGTCC	8746	8697	17443	2.07183e-05	4.85891	ACCCGTCC	148341	147126	295467	8.41421e-06	1.97332	ACCCGTCC	65665
ACCCGTCG	801	803	1604	8.31541e-07		ACCCGTCG	3993	4002	7995	2.52272e-05	30.3379	ACCCGTCG	30	23	53	1.41032e-05	16.9603	ACCCGTCG	124764	127579	252343	2.62112e-05	31.5212	ACCCGTCG	31940	33915	65855	2.14985e-05	25.8538	ACCCGTCG	80123	80224	160347	2.11323e-05	25.4135	ACCCGTCG	8016	7929	15945	1.8939e-05	22.7758	ACCCGTCG	139573	138586	278159	7.92132e-06	9.52607	ACCCGTCG	55188
ACCCGTCT	4349	4517	8866	4.59629e-06		ACCCGTCT	2416	2399	4815	1.51931e-05	3.30552	ACCCGTCT	39	21	60	1.59659e-05	3.47366	ACCCGTCT	58862	58245	117107	1.21641e-05	2.6465	ACCCGTCT	17821	17430	35251	1.15078e-05	2.50371	ACCCGTCT	76252	76997	153249	2.01969e-05	4.39418	ACCCGTCT	8419	8532	16951	2.01339e-05	4.38047	ACCCGTCT	191930	192147	384077	1.09376e-05	2.37966	ACCCGTCT	87321
ACCCGTGA	4923	4812	9735	5.04679e-06		ACCCGTGA	2596	2665	5261	1.66004e-05	3.2893	ACCCGTGA	21	29	50	1.33049e-05	2.63632	ACCCGTGA	79496	79396	158892	1.65043e-05	3.27026	ACCCGTGA	21963	21683	43646	1.42483e-05	2.82325	ACCCGTGA	56201	56991	113192	1.49177e-05	2.95588	ACCCGTGA	6031	6303	12334	1.465e-05	2.90283	ACCCGTGA	193985	192317	386302	1.1001e-05	2.1798	ACCCGTGA	82865
ACCCGTGC	4367	4166	8533	4.42365e-06		ACCCGTGC	2743	2582	5325	1.68024e-05	3.7983	ACCCGTGC	38	35	73	1.94252e-05	4.39121	ACCCGTGC	93758	92725	186483	1.93702e-05	4.37879	ACCCGTGC	24877	24329	49206	1.60634e-05	3.63125	ACCCGTGC	59264	59546	118810	1.56581e-05	3.53964	ACCCGTGC	5940	5826	11766	1.39753e-05	3.15922	ACCCGTGC	122289	122490	244779	6.97073e-06	1.57579	ACCCGTGC	55055
ACCCGTGG	6149	6238	12387	6.42163e-06		ACCCGTGG	3419	2700	6119	1.93077e-05	3.00667	ACCCGTGG	60	39	99	2.63438e-05	4.10235	ACCCGTGG	86888	88041	174929	1.81701e-05	2.82951	ACCCGTGG	23405	24329	47734	1.55829e-05	2.42662	ACCCGTGG	62876	62550	125426	1.65301e-05	2.57412	ACCCGTGG	6813	6718	13531	1.60717e-05	2.50275	ACCCGTGG	132757	133383	266140	7.57904e-06	1.18024	ACCCGTGG	63105
ACCCGTGT	5270	5366	10636	5.51388e-06		ACCCGTGT	2117	2250	4367	1.37795e-05	2.49906	ACCCGTGT	29	23	52	1.38371e-05	2.50951	ACCCGTGT	45437	45817	91254	9.47867e-06	1.71905	ACCCGTGT	13321	13482	26803	8.7499e-06	1.58688	ACCCGTGT	47334	47612	94946	1.25131e-05	2.26937	ACCCGTGT	4834	4879	9713	1.15368e-05	2.09232	ACCCGTGT	159493	159879	319372	9.09496e-06	1.64947	ACCCGTGT	69989
ACCCGTTA	2624	2686	5310	2.7528e-06		ACCCGTTA	2281	2096	4377	1.38111e-05	5.01711	ACCCGTTA	33	28	61	1.6232e-05	5.89656	ACCCGTTA	54485	54973	109458	1.13695e-05	4.13018	ACCCGTTA	18709	19722	38431	1.25459e-05	4.55751	ACCCGTTA	32138	32900	65038	8.57145e-06	3.11372	ACCCGTTA	3971	3879	7850	9.324e-06	3.3871	ACCCGTTA	162447	163592	326039	9.28483e-06	3.37287	ACCCGTTA	70659
ACCCGTTC	3184	3249	6433	3.33498e-06		ACCCGTTC	4540	3884	8424	2.65809e-05	7.97033	ACCCGTTC	24	21	45	1.19744e-05	3.59056	ACCCGTTC	138406	138598	277004	2.87728e-05	8.62757	ACCCGTTC	35480	36253	71733	2.34174e-05	7.02175	ACCCGTTC	75978	76358	152336	2.00766e-05	6.02	ACCCGTTC	8570	8612	17182	2.04083e-05	6.11946	ACCCGTTC	198827	199271	398098	1.13369e-05	3.39939	ACCCGTTC	85820
ACCCGTTG	2794	2718	5512	2.85752e-06		ACCCGTTG	2961	3259	6220	1.96264e-05	6.86836	ACCCGTTG	34	33	67	1.78286e-05	6.2392	ACCCGTTG	92383	93233	185616	1.92802e-05	6.74718	ACCCGTTG	27016	27385	54401	1.77593e-05	6.21495	ACCCGTTG	67331	67095	134426	1.77162e-05	6.19986	ACCCGTTG	7481	7487	14968	1.77785e-05	6.22168	ACCCGTTG	223167	221514	444681	1.26635e-05	4.43164	ACCCGTTG	84323
ACCCGTTT	4637	4757	9394	4.87001e-06		ACCCGTTT	3178	2978	6156	1.94245e-05	3.98859	ACCCGTTT	41	30	71	1.8893e-05	3.87946	ACCCGTTT	106419	106030	212449	2.20674e-05	4.53127	ACCCGTTT	35678	35527	71205	2.3245e-05	4.7731	ACCCGTTT	60381	60578	120959	1.59414e-05	3.27337	ACCCGTTT	7367	7109	14476	1.71942e-05	3.53062	ACCCGTTT	322256	321834	644090	1.83422e-05	3.76635	ACCCGTTT	141915
ACGCGAAA	647	689	1336	6.92605e-07		ACGCGAAA	3360	2806	6166	1.9456e-05	28.0911	ACGCGAAA	22	45	67	1.78286e-05	25.7414	ACGCGAAA	97576	97629	195205	2.02762e-05	29.2753	ACGCGAAA	35286	35637	70923	2.3153e-05	33.4288	ACGCGAAA	69959	69641	139600	1.83981e-05	26.5636	ACGCGAAA	7368	7260	14628	1.73747e-05	25.086	ACGCGAAA	390518	389098	779616	2.22016e-05	32.0552	ACGCGAAA	153228
ACGCGAAC	555	592	1147	5.94624e-07		ACGCGAAC	4102	3480	7582	2.3924e-05	40.2339	ACGCGAAC	39	44	83	2.20862e-05	37.1431	ACGCGAAC	124673	124901	249574	2.59236e-05	43.5965	ACGCGAAC	38051	37391	75442	2.46282e-05	41.4181	ACGCGAAC	65627	65659	131286	1.73024e-05	29.098	ACGCGAAC	5820	6098	11918	1.41558e-05	23.8064	ACGCGAAC	204899	205453	410352	1.16859e-05	19.6525	ACGCGAAC	85716
ACGCGAAG	966	925	1891	9.80327e-07		ACGCGAAG	4125	2889	7014	2.21318e-05	22.5759	ACGCGAAG	37	39	76	2.02235e-05	20.6293	ACGCGAAG	131829	129105	260934	2.71036e-05	27.6475	ACGCGAAG	39323	37282	76605	2.50079e-05	25.5097	ACGCGAAG	82345	82983	165328	2.17888e-05	22.2261	ACGCGAAG	7852	7748	15600	1.85292e-05	18.9011	ACGCGAAG	210292	209497	419789	1.19546e-05	12.1945	ACGCGAAG	86149
ACGCGAAT	568	611	1179	6.11214e-07		ACGCGAAT	2329	2316	4645	1.46567e-05	23.9797	ACGCGAAT	26	45	71	1.8893e-05	30.9106	ACGCGAAT	77179	77309	154488	1.60469e-05	26.2541	ACGCGAAT	28468	28473	56941	1.85885e-05	30.4125	ACGCGAAT	57493	57358	114851	1.51364e-05	24.7644	ACGCGAAT	5829	5835	11664	1.38542e-05	22.6666	ACGCGAAT	264289	263630	527919	1.50339e-05	24.5968	ACGCGAAT	104269
ACGCGACA	686	672	1358	7.0401e-07		ACGCGACA	2938	2825	5763	1.81844e-05	25.8298	ACGCGACA	37	40	77	2.04896e-05	29.1041	ACGCGACA	80188	80881	161069	1.67304e-05	23.7645	ACGCGACA	25694	25941	51635	1.68564e-05	23.9433	ACGCGACA	78906	78623	157529	2.0761e-05	29.4896	ACGCGACA	7559	7566	15125	1.7965e-05	25.5181	ACGCGACA	218999	217831	436830	1.24399e-05	17.67	ACGCGACA	79673
ACGCGACC	762	802	1564	8.10804e-07		ACGCGACC	4109	3589	7698	2.42901e-05	29.958	ACGCGACC	46	52	98	2.60777e-05	32.1627	ACGCGACC	146826	147145	293971	3.05351e-05	37.6603	ACGCGACC	37455	37536	74991	2.4481e-05	30.1934	ACGCGACC	73400	73175	146575	1.93173e-05	23.8249	ACGCGACC	6557	6537	13094	1.55527e-05	19.1818	ACGCGACC	149591	149377	298968	8.51391e-06	10.5006	ACGCGACC	62557
ACGCGACG	405	431	836	4.33397e-07		ACGCGACG	4255	3826	8081	2.54986e-05	58.8343	ACGCGACG	41	27	68	1.80947e-05	41.7509	ACGCGACG	180781	180519	361300	3.75287e-05	86.592	ACGCGACG	50436	51108	101544	3.31493e-05	76.4871	ACGCGACG	85966	85997	171963	2.26632e-05	52.2921	ACGCGACG	7641	7574	15215	1.80719e-05	41.6984	ACGCGACG	165012	165202	330214	9.40372e-06	21.6977	ACGCGACG	60562
ACGCGACT	725	624	1349	6.99345e-07		ACGCGACT	1975	1704	3679	1.16086e-05	16.5993	ACGCGACT	31	48	79	2.10218e-05	30.0593	ACGCGACT	51524	51183	102707	1.06683e-05	15.2547	ACGCGACT	15592	15311	30903	1.00884e-05	14.4254	ACGCGACT	63855	63944	127799	1.68428e-05	24.0837	ACGCGACT	5925	5946	11871	1.41e-05	20.1618	ACGCGACT	162858	162781	325639	9.27343e-06	13.2602	ACGCGACT	64878
ACGCGAGA	881	876	1757	9.10859e-07		ACGCGAGA	2144	2272	4416	1.39341e-05	15.2978	ACGCGAGA	35	57	92	2.44811e-05	26.8769	ACGCGAGA	63249	63118	126367	1.31259e-05	14.4105	ACGCGAGA	18533	18379	36912	1.205e-05	13.2293	ACGCGAGA	79997	79723	159720	2.10497e-05	23.1097	ACGCGAGA	7864	7819	15683	1.86278e-05	20.4508	ACGCGAGA	185138	184782	369920	1.05345e-05	11.5654	ACGCGAGA	68715
ACGCGAGC	1064	1008	2072	1.07416e-06		ACGCGAGC	3003	3261	6264	1.97653e-05	18.4007	ACGCGAGC	42	26	68	1.80947e-05	16.8454	ACGCGAGC	149126	148133	297259	3.08767e-05	28.7449	ACGCGAGC	42309	41725	84034	2.74331e-05	25.5391	ACGCGAGC	81063	81185	162248	2.13829e-05	19.9066	ACGCGAGC	6780	6828	13608	1.61632e-05	15.0473	ACGCGAGC	142477	141900	284377	8.09839e-06	7.53927	ACGCGAGC	57914
ACGCGAGG	1525	1627	3152	1.63405e-06		ACGCGAGG	2286	2563	4849	1.53004e-05	9.36349	ACGCGAGG	32	28	60	1.59659e-05	9.77076	ACGCGAGG	86740	86130	172870	1.79562e-05	10.9888	ACGCGAGG	21537	20857	42394	1.38396e-05	8.46951	ACGCGAGG	75002	74986	149988	1.97671e-05	12.097	ACGCGAGG	7035	6970	14005	1.66347e-05	10.1801	ACGCGAGG	124171	125043	249214	7.09703e-06	4.34321	ACGCGAGG	51279
ACGCGAGT	762	845	1607	8.33096e-07		ACGCGAGT	1913	1929	3842	1.21229e-05	14.5517	ACGCGAGT	26	21	47	1.25066e-05	15.0122	ACGCGAGT	46457	46863	93320	9.69327e-06	11.6352	ACGCGAGT	14046	14652	28698	9.36852e-06	11.2454	ACGCGAGT	52627	53013	105640	1.39224e-05	16.7117	ACGCGAGT	4906	4918	9824	1.16687e-05	14.0064	ACGCGAGT	149926	149516	299442	8.52741e-06	10.2358	ACGCGAGT	59702
ACGCGATA	401	418	819	4.24584e-07		ACGCGATA	2228	2474	4702	1.48366e-05	34.9438	ACGCGATA	38	31	69	1.83608e-05	43.2443	ACGCGATA	76024	76999	153023	1.58947e-05	37.436	ACGCGATA	27955	28714	56669	1.84997e-05	43.5714	ACGCGATA	54172	54155	108327	1.42766e-05	33.6249	ACGCGATA	5823	5642	11465	1.36178e-05	32.0733	ACGCGATA	186684	185827	372511	1.06082e-05	24.985	ACGCGATA	78524
ACGCGATC	575	605	1180	6.11732e-07		ACGCGATC	5618	4755	10373	3.27307e-05	53.5049	ACGCGATC	40	31	71	1.8893e-05	30.8844	ACGCGATC	235402	235484	470886	4.89115e-05	79.9558	ACGCGATC	62294	62750	125044	4.08209e-05	66.73	ACGCGATC	77066	77425	154491	2.03606e-05	33.2835	ACGCGATC	7310	7351	14661	1.74139e-05	28.4665	ACGCGATC	189084	189320	378404	1.07761e-05	17.6156	ACGCGATC	69311
ACGCGATG	965	939	1904	9.87066e-07		ACGCGATG	4445	4069	8514	2.68649e-05	27.2169	ACGCGATG	43	23	66	1.75625e-05	17.7926	ACGCGATG	177294	177913	355207	3.68958e-05	37.3793	ACGCGATG	53804	53482	107286	3.50237e-05	35.4827	ACGCGATG	85830	86052	171882	2.26526e-05	22.9494	ACGCGATG	8372	8377	16749	1.9894e-05	20.1546	ACGCGATG	216717	216510	433227	1.23373e-05	12.4989	ACGCGATG	89587
ACGCGATT	598	644	1242	6.43874e-07		ACGCGATT	2928	2469	5397	1.70296e-05	26.4486	ACGCGATT	29	49	78	2.07557e-05	32.2356	ACGCGATT	90333	89774	180107	1.87079e-05	29.0553	ACGCGATT	32745	32418	65163	2.12726e-05	33.0385	ACGCGATT	55796	56224	112020	1.47633e-05	22.9288	ACGCGATT	5659	5778	11437	1.35845e-05	21.0981	ACGCGATT	264321	263365	527686	1.50273e-05	23.3388	ACGCGATT	97799
ACGCGCAA	636	615	1251	6.4854e-07		ACGCGCAA	3552	3427	6979	2.20214e-05	33.9553	ACGCGCAA	36	123	159	4.23097e-05	65.2384	ACGCGCAA	138646	137033	275679	2.86351e-05	44.1532	ACGCGCAA	48016	47052	95068	3.10352e-05	47.8539	ACGCGCAA	79914	79900	159814	2.10621e-05	32.4762	ACGCGCAA	7244	7454	14698	1.74579e-05	26.9187	ACGCGCAA	240775	239358	480133	1.36731e-05	21.0828	ACGCGCAA	96410
ACGCGCAC	1655	1626	3281	1.70093e-06		ACGCGCAC	5002	5019	10021	3.162e-05	18.5899	ACGCGCAC	94	87	181	4.81639e-05	28.3162	ACGCGCAC	184224	184312	368536	3.82803e-05	22.5056	ACGCGCAC	51069	50490	101559	3.31542e-05	19.4918	ACGCGCAC	69418	69751	139169	1.83413e-05	10.7831	ACGCGCAC	5490	5373	10863	1.29028e-05	7.58572	ACGCGCAC	195775	194219	389994	1.11061e-05	6.52945	ACGCGCAC	84856
ACGCGCAG	2045	2074	4119	2.13536e-06		ACGCGCAG	4760	4057	8817	2.78209e-05	13.0287	ACGCGCAG	73	55	128	3.40606e-05	15.9508	ACGCGCAG	249638	247126	496764	5.15995e-05	24.1643	ACGCGCAG	70863	68622	139485	4.55352e-05	21.3244	ACGCGCAG	86224	86481	172705	2.2761e-05	10.6591	ACGCGCAG	7632	7619	15251	1.81147e-05	8.4832	ACGCGCAG	169869	170131	340000	9.6824e-06	4.53432	ACGCGCAG	68157
ACGCGCAT	933	942	1875	9.72032e-07		ACGCGCAT	2925	3157	6082	1.9191e-05	19.7432	ACGCGCAT	45	43	88	2.34167e-05	24.0904	ACGCGCAT	142169	144112	286281	2.97364e-05	30.592	ACGCGCAT	46825	47664	94489	3.08461e-05	31.7337	ACGCGCAT	67064	66851	133915	1.76488e-05	18.1566	ACGCGCAT	6137	5969	12106	1.43792e-05	14.7929	ACGCGCAT	212214	211564	423778	1.20682e-05	12.4154	ACGCGCAT	89358
ACGCGCCA	1216	1264	2480	1.28567e-06		ACGCGCCA	3571	4606	8177	2.58015e-05	20.0685	ACGCGCCA	58	93	151	4.01809e-05	31.2528	ACGCGCCA	188710	189339	378049	3.92684e-05	30.5431	ACGCGCCA	63831	63572	127403	4.1591e-05	32.3495	ACGCGCCA	78367	78597	156964	2.06865e-05	16.09	ACGCGCCA	7293	7246	14539	1.7269e-05	13.4319	ACGCGCCA	173090	174197	347287	9.88992e-06	7.6924	ACGCGCCA	63450
ACGCGCCC	2173	2323	4496	2.3308e-06		ACGCGCCC	4429	4859	9288	2.93071e-05	12.5738	ACGCGCCC	96	91	187	4.97604e-05	21.3491	ACGCGCCC	201149	200927	402076	4.17642e-05	17.9184	ACGCGCCC	52782	52009	104791	3.42093e-05	14.677	ACGCGCCC	69845	69782	139627	1.84016e-05	7.89497	ACGCGCCC	5915	5872	11787	1.40003e-05	6.00662	ACGCGCCC	123843	123832	247675	7.0532e-06	3.02608	ACGCGCCC	44073
ACGCGCCG	1208	1272	2480	1.28567e-06		ACGCGCCG	6457	6672	13129	4.14269e-05	32.2219	ACGCGCCG	95	52	147	3.91165e-05	30.4249	ACGCGCCG	377036	375760	752796	7.81939e-05	60.8194	ACGCGCCG	107981	105995	213976	6.98529e-05	54.3317	ACGCGCCG	79045	79287	158332	2.08668e-05	16.2302	ACGCGCCG	6479	6623	13102	1.55622e-05	12.1043	ACGCGCCG	124749	124109	248858	7.08689e-06	5.5122	ACGCGCCG	44119
ACGCGCCT	1520	1489	3009	1.55992e-06		ACGCGCCT	2819	2971	5790	1.82696e-05	11.7119	ACGCGCCT	31	77	108	2.87387e-05	18.4232	ACGCGCCT	127527	127059	254586	2.64442e-05	16.9523	ACGCGCCT	37759	36741	74500	2.43207e-05	15.591	ACGCGCCT	65923	65552	131475	1.73273e-05	11.1078	ACGCGCCT	5826	5658	11484	1.36404e-05	8.74428	ACGCGCCT	138033	138405	276438	7.87231e-06	5.04662	ACGCGCCT	52125
ACGCGCGA	438	465	903	4.68131e-07		ACGCGCGA	3472	3400	6872	2.16837e-05	46.3198	ACGCGCGA	75	230	305	8.11601e-05	173.371	ACGCGCGA	161625	162640	324265	3.36818e-05	71.9496	ACGCGCGA	41998	43094	85092	2.77785e-05	59.3391	ACGCGCGA	71156	70647	141803	1.86884e-05	39.9214	ACGCGCGA	6113	5996	12109	1.43827e-05	30.7237	ACGCGCGA	139627	139637	279264	7.95278e-06	16.9884	ACGCGCGA	48184
ACGCGCGC	1672	1630	3302	1.71181e-06		ACGCGCGC	6709	6759	13468	4.24966e-05	24.8255	ACGCGCGC	222	121	343	9.12718e-05	53.3188	ACGCGCGC	328135	329121	657256	6.827e-05	39.8817	ACGCGCGC	95123	95310	190433	6.21673e-05	36.3166	ACGCGCGC	78241	77555	155796	2.05326e-05	11.9946	ACGCGCGC	6093	5987	12080	1.43483e-05	8.38191	ACGCGCGC	165201	164422	329623	9.38689e-06	5.48359	ACGCGCGC	52239
ACGCGCGG	1506	1417	2923	1.51533e-06		ACGCGCGG	4206	4190	8396	2.64925e-05	17.483	ACGCGCGG	105	81	186	4.94943e-05	32.6623	ACGCGCGG	238247	236480	474727	4.93105e-05	32.541	ACGCGCGG	66332	65922	132254	4.31746e-05	28.4918	ACGCGCGG	58247	58691	116938	1.54114e-05	10.1703	ACGCGCGG	5119	5146	10265	1.21925e-05	8.04606	ACGCGCGG	98496	98939	197435	5.62249e-06	3.7104	ACGCGCGG	32608
ACGCGCGT	597	597	1194	6.1899e-07		ACGCGCGT	3021	3021	6042	1.90648e-05	30.7998	ACGCGCGT	81	40	121	3.21979e-05	52.0169	ACGCGCGT	119843	119843	239686	2.48965e-05	40.2212	ACGCGCGT	35010	35010	70020	2.28582e-05	36.9282	ACGCGCGT	49320	49320	98640	1.29999e-05	21.0018	ACGCGCGT	3904	3904	7808	9.27411e-06	14.9827	ACGCGCGT	171850	171850	343700	9.78777e-06	15.8125	ACGCGCGT	72858
ACGCGCTA	472	455	927	4.80573e-07		ACGCGCTA	2133	1845	3978	1.25521e-05	26.119	ACGCGCTA	28	95	123	3.27301e-05	68.1065	ACGCGCTA	63344	63649	126993	1.31909e-05	27.4483	ACGCGCTA	24863	24622	49485	1.61545e-05	33.6151	ACGCGCTA	39857	40372	80229	1.05735e-05	22.0019	ACGCGCTA	3607	3540	7147	8.489e-06	17.6643	ACGCGCTA	137741	138587	276328	7.86917e-06	16.3746	ACGCGCTA	62014
ACGCGCTC	1690	1595	3285	1.703e-06		ACGCGCTC	6189	5740	11929	3.76405e-05	22.1024	ACGCGCTC	91	135	226	6.01383e-05	35.3131	ACGCGCTC	261487	260498	521985	5.42193e-05	31.8375	ACGCGCTC	65287	64907	130194	4.25021e-05	24.9572	ACGCGCTC	89914	89580	179494	2.36558e-05	13.8906	ACGCGCTC	7289	7280	14569	1.73046e-05	10.1613	ACGCGCTC	165513	165963	331476	9.43966e-06	5.54296	ACGCGCTC	63114
ACGCGCTG	2138	1992	4130	2.14106e-06		ACGCGCTG	7271	6206	13477	4.2525e-05	19.8616	ACGCGCTG	83	55	138	3.67216e-05	17.1511	ACGCGCTG	380559	385258	765817	7.95464e-05	37.1528	ACGCGCTG	104736	108992	213728	6.9772e-05	32.5875	ACGCGCTG	89968	90034	180002	2.37227e-05	11.0799	ACGCGCTG	8021	8025	16046	1.9059e-05	8.90164	ACGCGCTG	176426	178009	354435	1.00935e-05	4.71424	ACGCGCTG	70028
ACGCGCTT	992	983	1975	1.02387e-06		ACGCGCTT	3473	4002	7475	2.35864e-05	23.0365	ACGCGCTT	48	68	116	3.08674e-05	30.1477	ACGCGCTT	161868	160526	322394	3.34875e-05	32.7066	ACGCGCTT	55207	54001	109208	3.56512e-05	34.8199	ACGCGCTT	74671	74561	149232	1.96675e-05	19.2089	ACGCGCTT	6748	6683	13431	1.59529e-05	15.581	ACGCGCTT	198306	198541	396847	1.13013e-05	11.0378	ACGCGCTT	80698
ACGCGGAA	1182	1230	2412	1.25042e-06		ACGCGGAA	2899	3214	6113	1.92888e-05	15.4258	ACGCGGAA	62	84	146	3.88504e-05	31.0698	ACGCGGAA	114496	115238	229734	2.38628e-05	19.0838	ACGCGGAA	34730	35287	70017	2.28572e-05	18.2796	ACGCGGAA	68732	68580	137312	1.80965e-05	14.4723	ACGCGGAA	7171	7347	14518	1.72441e-05	13.7906	ACGCGGAA	233818	233865	467683	1.33185e-05	10.6512	ACGCGGAA	91729
ACGCGGAC	1199	1151	2350	1.21828e-06		ACGCGGAC	3959	3304	7263	2.29175e-05	18.8113	ACGCGGAC	95	88	183	4.86961e-05	39.9711	ACGCGGAC	138339	137193	275532	2.86199e-05	23.492	ACGCGGAC	32445	31208	63653	2.07797e-05	17.0566	ACGCGGAC	67991	67724	135715	1.78861e-05	14.6814	ACGCGGAC	6386	6393	12779	1.51785e-05	12.459	ACGCGGAC	141558	140947	282505	8.04508e-06	6.60364	ACGCGGAC	56635
ACGCGGAG	2270	2328	4598	2.38368e-06		ACGCGGAG	3434	2786	6220	1.96264e-05	8.23366	ACGCGGAG	61	40	101	2.6876e-05	11.275	ACGCGGAG	103576	103338	206914	2.14924e-05	9.01648	ACGCGGAG	23938	23353	47291	1.54382e-05	6.47664	ACGCGGAG	74572	74360	148932	1.9628e-05	8.2343	ACGCGGAG	7766	7557	15323	1.82002e-05	7.63533	ACGCGGAG	139748	138681	278429	7.929e-06	3.32637	ACGCGGAG	51569
ACGCGGAT	927	900	1827	9.47148e-07		ACGCGGAT	2916	3017	5933	1.87208e-05	19.7655	ACGCGGAT	42	69	111	2.95369e-05	31.1851	ACGCGGAT	138596	139301	277897	2.88655e-05	30.4762	ACGCGGAT	41278	41230	82508	2.69349e-05	28.4379	ACGCGGAT	63463	63300	126763	1.67063e-05	17.6385	ACGCGGAT	6812	6648	13460	1.59874e-05	16.8795	ACGCGGAT	160484	159802	320286	9.12099e-06	9.62995	ACGCGGAT	65574
ACGCGGCA	1594	1631	3225	1.6719e-06		ACGCGGCA	3509	3602	7111	2.24379e-05	13.4206	ACGCGGCA	47	122	169	4.49707e-05	26.898	ACGCGGCA	168067	168006	336073	3.49083e-05	20.8795	ACGCGGCA	51139	49670	100809	3.29093e-05	19.6838	ACGCGGCA	71872	71724	143596	1.89247e-05	11.3193	ACGCGGCA	6634	6653	13287	1.57819e-05	9.43953	ACGCGGCA	164259	163219	327478	9.3258e-06	5.57798	ACGCGGCA	63836
ACGCGGCC	3023	2862	5885	3.05088e-06		ACGCGGCC	6268	5994	12262	3.86912e-05	12.682	ACGCGGCC	107	128	235	6.25332e-05	20.4967	ACGCGGCC	316356	316786	633142	6.57653e-05	21.5561	ACGCGGCC	69426	69817	139243	4.54562e-05	14.8993	ACGCGGCC	81224	81607	162831	2.14597e-05	7.03393	ACGCGGCC	7423	7446	14869	1.7661e-05	5.7888	ACGCGGCC	118842	119601	238443	6.7903e-06	2.22568	ACGCGGCC	42609
ACGCGGCG	1763	1693	3456	1.79165e-06		ACGCGGCG	7391	6847	14238	4.49262e-05	25.0753	ACGCGGCG	99	42	141	3.75199e-05	20.9415	ACGCGGCG	422191	422002	844193	8.76874e-05	48.9423	ACGCGGCG	115447	116047	231494	7.55717e-05	42.18	ACGCGGCG	86270	86547	172817	2.27758e-05	12.7122	ACGCGGCG	7615	7575	15190	1.80422e-05	10.0702	ACGCGGCG	141801	141534	283335	8.06872e-06	4.50351	ACGCGGCG	49456
ACGCGGCT	2074	1991	4065	2.10737e-06		ACGCGGCT	2953	2717	5670	1.7891e-05	8.48973	ACGCGGCT	69	38	107	2.84726e-05	13.511	ACGCGGCT	136658	135681	272339	2.82882e-05	13.4235	ACGCGGCT	36245	35212	71457	2.33273e-05	11.0694	ACGCGGCT	65167	64886	130053	1.71399e-05	8.13331	ACGCGGCT	6237	6081	12318	1.4631e-05	6.94277	ACGCGGCT	135367	136146	271513	7.73205e-06	3.66906	ACGCGGCT	54258
ACGCGGGA	1891	1895	3786	1.96273e-06		ACGCGGGA	2178	2285	4463	1.40824e-05	7.17493	ACGCGGGA	32	89	121	3.21979e-05	16.4047	ACGCGGGA	90053	88508	178561	1.85474e-05	9.44979	ACGCGGGA	24967	24344	49311	1.60977e-05	8.20169	ACGCGGGA	58467	58491	116958	1.54141e-05	7.85339	ACGCGGGA	6153	6045	12198	1.44884e-05	7.38178	ACGCGGGA	120875	120530	241405	6.87465e-06	3.5026	ACGCGGGA	47811
ACGCGGGC	2505	2534	5039	2.6123e-06		ACGCGGGC	4800	4331	9131	2.88117e-05	11.0292	ACGCGGGC	116	88	204	5.42841e-05	20.7802	ACGCGGGC	244999	244917	489916	5.08882e-05	19.4802	ACGCGGGC	59319	58305	117624	3.83986e-05	14.6991	ACGCGGGC	67598	67788	135386	1.78427e-05	6.83026	ACGCGGGC	5890	5927	11817	1.40359e-05	5.37299	ACGCGGGC	87948	88527	176475	5.02559e-06	1.92382	ACGCGGGC	31479
ACGCGGGG	3127	3286	6413	3.32461e-06		ACGCGGGG	2452	2768	5220	1.64711e-05	4.95428	ACGCGGGG	73	46	119	3.16657e-05	9.52465	ACGCGGGG	96875	95827	192702	2.00162e-05	6.02062	ACGCGGGG	22456	21847	44303	1.44628e-05	4.35023	ACGCGGGG	56367	55810	112177	1.4784e-05	4.44683	ACGCGGGG	5841	5638	11479	1.36344e-05	4.10106	ACGCGGGG	71715	71726	143441	4.08486e-06	1.22867	ACGCGGGG	28468
ACGCGGGT	1351	1365	2716	1.40802e-06		ACGCGGGT	2661	2869	5530	1.74492e-05	12.3927	ACGCGGGT	48	43	91	2.4215e-05	17.1979	ACGCGGGT	115678	116469	232147	2.41134e-05	17.1257	ACGCGGGT	31974	32796	64770	2.11443e-05	15.017	ACGCGGGT	47151	46781	93932	1.23794e-05	8.79207	ACGCGGGT	4732	4592	9324	1.10748e-05	7.86549	ACGCGGGT	103382	103219	206601	5.88351e-06	4.17857	ACGCGGGT	43608
ACGCGGTA	662	664	1326	6.87421e-07		ACGCGGTA	2616	2857	5473	1.72694e-05	25.122	ACGCGGTA	51	49	100	2.66099e-05	38.7097	ACGCGGTA	91564	92886	184450	1.91591e-05	27.8709	ACGCGGTA	32411	32660	65071	2.12426e-05	30.9018	ACGCGGTA	47379	47025	94404	1.24416e-05	18.099	ACGCGGTA	4751	4784	9535	1.13254e-05	16.4752	ACGCGGTA	127154	128318	255472	7.27524e-06	10.5834	ACGCGGTA	53975
ACGCGGTC	1159	1164	2323	1.20428e-06		ACGCGGTC	4483	4653	9136	2.88275e-05	23.9375	ACGCGGTC	44	69	113	3.00691e-05	24.9685	ACGCGGTC	214647	214648	429295	4.45914e-05	37.0274	ACGCGGTC	51280	51672	102952	3.36089e-05	27.9078	ACGCGGTC	71977	71907	143884	1.89627e-05	15.746	ACGCGGTC	6725	6808	13533	1.60741e-05	13.3474	ACGCGGTC	147165	146412	293577	8.36038e-06	6.94221	ACGCGGTC	62386
ACGCGGTG	2749	1865	4614	2.39198e-06		ACGCGGTG	5204	4536	9740	3.07333e-05	12.8485	ACGCGGTG	65	60	125	3.32623e-05	13.9058	ACGCGGTG	256270	256625	512895	5.32751e-05	22.2724	ACGCGGTG	72512	72428	144940	4.7316e-05	19.7811	ACGCGGTG	71311	71984	143295	1.8885e-05	7.89516	ACGCGGTG	6751	7027	13778	1.63651e-05	6.84166	ACGCGGTG	147696	147362	295058	8.40256e-06	3.51281	ACGCGGTG	62362
ACGCGGTT	909	865	1774	9.19672e-07		ACGCGGTT	2794	2974	5768	1.82002e-05	19.7899	ACGCGGTT	50	26	76	2.02235e-05	21.9899	ACGCGGTT	108284	109117	217401	2.25817e-05	24.5541	ACGCGGTT	34945	34866	69811	2.279e-05	24.7805	ACGCGGTT	52392	52676	105068	1.38471e-05	15.0565	ACGCGGTT	5554	5528	11082	1.31629e-05	14.3126	ACGCGGTT	172909	172914	345823	9.84823e-06	10.7084	ACGCGGTT	74472
ACGCGTAA	500	519	1019	5.28267e-07		ACGCGTAA	1487	1625	3112	9.81953e-06	18.5882	ACGCGTAA	26	33	59	1.56998e-05	29.7195	ACGCGTAA	53017	51545	104562	1.0861e-05	20.5597	ACGCGTAA	25356	24455	49811	1.62609e-05	30.7816	ACGCGTAA	34479	34299	68778	9.06435e-06	17.1586	ACGCGTAA	3143	3112	6255	7.4295e-06	14.0639	ACGCGTAA	193482	193729	387211	1.10269e-05	20.8736	ACGCGTAA	80246
ACGCGTAC	470	491	961	4.98199e-07		ACGCGTAC	2801	2489	5290	1.66919e-05	33.5046	ACGCGTAC	69	30	99	2.63438e-05	52.878	ACGCGTAC	73371	73216	146587	1.52262e-05	30.5625	ACGCGTAC	24017	24217	48234	1.57461e-05	31.606	ACGCGTAC	51215	51572	102787	1.35464e-05	27.1908	ACGCGTAC	3909	3976	7885	9.36557e-06	18.7989	ACGCGTAC	147014	148301	295315	8.40988e-06	16.8806	ACGCGTAC	65792
ACGCGTAG	506	543	1049	5.4382e-07		ACGCGTAG	1160	1597	2757	8.69937e-06	15.9968	ACGCGTAG	22	31	53	1.41032e-05	25.9337	ACGCGTAG	45048	45675	90723	9.42352e-06	17.3284	ACGCGTAG	15774	15758	31532	1.02937e-05	18.9285	ACGCGTAG	38061	37633	75694	9.97581e-06	18.344	ACGCGTAG	3264	3348	6612	7.85354e-06	14.4414	ACGCGTAG	133068	132957	266025	7.57577e-06	13.9307	ACGCGTAG	56126
ACGCGTAT	603	635	1238	6.418e-07		ACGCGTAT	1931	1906	3837	1.21072e-05	18.8644	ACGCGTAT	32	38	70	1.86269e-05	29.0229	ACGCGTAT	55341	55295	110636	1.14919e-05	17.9057	ACGCGTAT	22940	23514	46454	1.5165e-05	23.6289	ACGCGTAT	43982	44131	88113	1.16125e-05	18.0937	ACGCGTAT	4172	4243	8415	9.99509e-06	15.5735	ACGCGTAT	182583	180942	363525	1.03523e-05	16.1302	ACGCGTAT	79051
ACGCGTCA	855	802	1657	8.59017e-07		ACGCGTCA	2206	2408	4614	1.45589e-05	16.9483	ACGCGTCA	35	73	108	2.87387e-05	33.4553	ACGCGTCA	77701	77482	155183	1.61191e-05	18.7645	ACGCGTCA	27494	27583	55077	1.798e-05	20.9309	ACGCGTCA	62969	63034	126003	1.66061e-05	19.3315	ACGCGTCA	5647	5543	11190	1.32912e-05	15.4725	ACGCGTCA	190722	192485	383207	1.09128e-05	12.7039	ACGCGTCA	81582
ACGCGTCC	1506	1448	2954	1.5314e-06		ACGCGTCC	2653	3176	5829	1.83927e-05	12.0103	ACGCGTCC	53	44	97	2.58116e-05	16.8548	ACGCGTCC	99436	98784	198220	2.05894e-05	13.4448	ACGCGTCC	27442	26711	54153	1.76784e-05	11.5439	ACGCGTCC	66183	66323	132506	1.74631e-05	11.4034	ACGCGTCC	5538	5610	11148	1.32413e-05	8.64649	ACGCGTCC	142201	141672	283873	8.08404e-06	5.27884	ACGCGTCC	56702
ACGCGTCG	432	392	824	4.27176e-07		ACGCGTCG	3825	3865	7690	2.42648e-05	56.8029	ACGCGTCG	46	55	101	2.6876e-05	62.9155	ACGCGTCG	164806	163481	328287	3.40996e-05	79.8257	ACGCGTCG	48368	47298	95666	3.12304e-05	73.109	ACGCGTCG	81950	82426	164376	2.16633e-05	50.7129	ACGCGTCG	6816	6656	13472	1.60016e-05	37.4592	ACGCGTCG	153577	153649	307226	8.74908e-06	20.4812	ACGCGTCG	56617
ACGCGTCT	1094	1120	2214	1.14778e-06		ACGCGTCT	1986	2010	3996	1.26089e-05	10.9855	ACGCGTCT	42	25	67	1.78286e-05	15.5332	ACGCGTCT	53815	53727	107542	1.11705e-05	9.73233	ACGCGTCT	19496	19331	38827	1.26752e-05	11.0432	ACGCGTCT	70528	70342	140870	1.85654e-05	16.1752	ACGCGTCT	6253	6264	12517	1.48673e-05	12.9532	ACGCGTCT	167879	167948	335827	9.56356e-06	8.33226	ACGCGTCT	67152
ACGCGTGA	1057	1174	2231	1.15659e-06		ACGCGTGA	1855	1755	3610	1.13909e-05	9.84871	ACGCGTGA	30	60	90	2.39489e-05	20.7065	ACGCGTGA	72607	73435	146042	1.51696e-05	13.1158	ACGCGTGA	24696	24938	49634	1.62031e-05	14.0094	ACGCGTGA	48211	48550	96761	1.27523e-05	11.0258	ACGCGTGA	4339	4434	8773	1.04203e-05	9.00952	ACGCGTGA	199878	199653	399531	1.13777e-05	9.8373	ACGCGTGA	86130
ACGCGTGC	1555	1561	3116	1.61539e-06		ACGCGTGC	2609	2644	5253	1.65752e-05	10.2608	ACGCGTGC	46	24	70	1.86269e-05	11.5309	ACGCGTGC	105249	105265	210514	2.18664e-05	13.5363	ACGCGTGC	31513	30773	62286	2.03334e-05	12.5873	ACGCGTGC	57781	57930	115711	1.52497e-05	9.44028	ACGCGTGC	4436	4442	8878	1.0545e-05	6.52786	ACGCGTGC	174914	174254	349168	9.94348e-06	6.15548	ACGCGTGC	74043
ACGCGTGG	1983	1855	3838	1.98968e-06		ACGCGTGG	2854	2227	5081	1.60325e-05	8.05779	ACGCGTGG	44	35	79	2.10218e-05	10.5654	ACGCGTGG	94050	94683	188733	1.96039e-05	9.85279	ACGCGTGG	28927	29049	57976	1.89264e-05	9.51226	ACGCGTGG	56236	55649	111885	1.47455e-05	7.41096	ACGCGTGG	5046	4977	10023	1.1905e-05	5.98337	ACGCGTGG	140954	141016	281970	8.02984e-06	4.03574	ACGCGTGG	59163
ACGCGTGT	1720	1747	3467	1.79735e-06		ACGCGTGT	1897	1857	3754	1.18453e-05	6.5904	ACGCGTGT	49	41	90	2.39489e-05	13.3245	ACGCGTGT	43777	43583	87360	9.0742e-06	5.04865	ACGCGTGT	14031	14130	28161	9.19322e-06	5.11487	ACGCGTGT	45592	44811	90403	1.19143e-05	6.62883	ACGCGTGT	3828	3701	7529	8.94272e-06	4.9755	ACGCGTGT	174203	173489	347692	9.90145e-06	5.50891	ACGCGTGT	71447
ACGCGTTA	541	586	1127	5.84256e-07		ACGCGTTA	1780	1654	3434	1.08356e-05	18.5459	ACGCGTTA	36	37	73	1.94252e-05	33.2477	ACGCGTTA	51707	53663	105370	1.09449e-05	18.7331	ACGCGTTA	23577	25073	48650	1.58819e-05	27.1831	ACGCGTTA	31738	32014	63752	8.40196e-06	14.3806	ACGCGTTA	2989	3168	6157	7.3131e-06	12.5169	ACGCGTTA	175879	176044	351923	1.00219e-05	17.1533	ACGCGTTA	81907
ACGCGTTC	956	979	1935	1.00314e-06		ACGCGTTC	3895	3532	7427	2.3435e-05	23.3617	ACGCGTTC	45	33	78	2.07557e-05	20.6908	ACGCGTTC	151300	150057	301357	3.13023e-05	31.2044	ACGCGTTC	46339	45865	92204	3.01002e-05	30.0061	ACGCGTTC	68427	68459	136886	1.80404e-05	17.984	ACGCGTTC	5839	5901	11740	1.39444e-05	13.9008	ACGCGTTC	243291	243902	487193	1.38741e-05	13.8307	ACGCGTTC	106972
ACGCGTTG	789	798	1587	8.22728e-07		ACGCGTTG	3042	3169	6211	1.9598e-05	23.8208	ACGCGTTG	41	68	109	2.90048e-05	35.2544	ACGCGTTG	110568	112542	223110	2.31747e-05	28.1681	ACGCGTTG	37414	39438	76852	2.50885e-05	30.4943	ACGCGTTG	70113	69846	139959	1.84454e-05	22.4198	ACGCGTTG	6525	6558	13083	1.55396e-05	18.8879	ACGCGTTG	218315	217614	435929	1.24142e-05	15.0891	ACGCGTTG	87981
ACGCGTTT	1123	1070	2193	1.13689e-06		ACGCGTTT	2626	2723	5349	1.68781e-05	14.8459	ACGCGTTT	45	14	59	1.56998e-05	13.8095	ACGCGTTT	96970	96398	193368	2.00854e-05	17.667	ACGCGTTT	40799	39887	80686	2.63401e-05	23.1686	ACGCGTTT	60477	60839	121316	1.59884e-05	14.0633	ACGCGTTT	5966	5781	11747	1.39527e-05	12.2727	ACGCGTTT	338301	338495	676796	1.92736e-05	16.9529	ACGCGTTT	144309
ACTCGAAA	4746	4806	9552	4.95192e-06		ACTCGAAA	3826	3598	7424	2.34255e-05	4.73059	ACTCGAAA	32	35	67	1.78286e-05	3.60034	ACTCGAAA	74920	73219	148139	1.53874e-05	3.10736	ACTCGAAA	24001	22076	46077	1.50419e-05	3.0376	ACTCGAAA	110680	110356	221036	2.91306e-05	5.88269	ACTCGAAA	11760	11433	23193	2.7548e-05	5.56309	ACTCGAAA	730763	730151	1460914	4.16034e-05	8.40147	ACTCGAAA	266661
ACTCGAAC	2675	2725	5400	2.79945e-06		ACTCGAAC	4033	5043	9076	2.86382e-05	10.2299	ACTCGAAC	17	33	50	1.33049e-05	4.75269	ACTCGAAC	91938	92087	184025	1.91149e-05	6.82809	ACTCGAAC	24607	24004	48611	1.58692e-05	5.66867	ACTCGAAC	101354	101649	203003	2.6754e-05	9.55688	ACTCGAAC	10073	9984	20057	2.38231e-05	8.50992	ACTCGAAC	476227	476793	953020	2.71398e-05	9.69467	ACTCGAAC	172008
ACTCGAAG	4661	4760	9421	4.88401e-06		ACTCGAAG	4237	4090	8327	2.62748e-05	5.37976	ACTCGAAG	31	24	55	1.46354e-05	2.9966	ACTCGAAG	94210	94625	188835	1.96145e-05	4.01607	ACTCGAAG	21656	22441	44097	1.43956e-05	2.94749	ACTCGAAG	126430	125851	252281	3.32485e-05	6.80762	ACTCGAAG	12381	12345	24726	2.93688e-05	6.01326	ACTCGAAG	387965	387480	775445	2.20829e-05	4.52146	ACTCGAAG	146942
ACTCGAAT	4439	4366	8805	4.56466e-06		ACTCGAAT	2628	2880	5508	1.73798e-05	3.80747	ACTCGAAT	17	14	31	8.24906e-06	1.80716	ACTCGAAT	52128	52667	104795	1.08852e-05	2.38467	ACTCGAAT	16988	17243	34231	1.11748e-05	2.44811	ACTCGAAT	95756	95523	191279	2.52089e-05	5.52262	ACTCGAAT	9577	9816	19393	2.30344e-05	5.04625	ACTCGAAT	516065	513750	1029815	2.93267e-05	6.42473	ACTCGAAT	189524
ACTCGACA	3153	3324	6477	3.35779e-06		ACTCGACA	3515	3391	6906	2.1791e-05	6.48969	ACTCGACA	23	29	52	1.38371e-05	4.12091	ACTCGACA	66724	66923	133647	1.38821e-05	4.1343	ACTCGACA	18872	18964	37836	1.23516e-05	3.67851	ACTCGACA	126293	126246	252539	3.32825e-05	9.91202	ACTCGACA	12774	12655	25429	3.02038e-05	8.99515	ACTCGACA	319949	319109	639058	1.81989e-05	5.4199	ACTCGACA	129516
ACTCGACC	2294	2314	4608	2.38887e-06		ACTCGACC	4033	4585	8618	2.7193e-05	11.3832	ACTCGACC	29	32	61	1.6232e-05	6.79486	ACTCGACC	112143	112806	224949	2.33657e-05	9.7811	ACTCGACC	26945	27275	54220	1.77002e-05	7.40947	ACTCGACC	120458	120193	240651	3.17157e-05	13.2765	ACTCGACC	11610	11471	23081	2.74149e-05	11.4761	ACTCGACC	253409	252974	506383	1.44206e-05	6.03659	ACTCGACC	101189
ACTCGACG	614	635	1249	6.47503e-07		ACTCGACG	4656	4741	9397	2.96511e-05	45.7929	ACTCGACG	26	12	38	1.01117e-05	15.6165	ACTCGACG	140105	139402	279507	2.90328e-05	44.838	ACTCGACG	35325	34523	69848	2.2802e-05	35.2153	ACTCGACG	121053	120917	241970	3.18896e-05	49.25	ACTCGACG	11199	11067	22266	2.64469e-05	40.8444	ACTCGACG	230846	229821	460667	1.31187e-05	20.2605	ACTCGACG	90270
ACTCGACT	3219	3137	6356	3.29506e-06		ACTCGACT	2396	2073	4469	1.41014e-05	4.27955	ACTCGACT	16	22	38	1.01117e-05	3.06876	ACTCGACT	47187	47041	94228	9.78758e-06	2.97038	ACTCGACT	14281	13926	28207	9.20824e-06	2.79456	ACTCGACT	106488	106432	212920	2.8061e-05	8.51609	ACTCGACT	10642	10456	21098	2.50596e-05	7.6052	ACTCGACT	317527	317107	634634	1.80729e-05	5.48484	ACTCGACT	125848
ACTCGAGA	4318	4258	8576	4.44595e-06		ACTCGAGA	2027	1958	3985	1.25742e-05	2.82823	ACTCGAGA	21	32	53	1.41032e-05	3.17215	ACTCGAGA	36750	36631	73381	7.62218e-06	1.71441	ACTCGAGA	9794	9527	19321	6.30738e-06	1.41868	ACTCGAGA	124207	123370	247577	3.26285e-05	7.33894	ACTCGAGA	12724	12575	25299	3.00494e-05	6.75883	ACTCGAGA	338540	338770	677310	1.92882e-05	4.33838	ACTCGAGA	126634
ACTCGAGC	3251	3050	6301	3.26655e-06		ACTCGAGC	1974	2061	4035	1.27319e-05	3.89767	ACTCGAGC	35	53	88	2.34167e-05	7.16864	ACTCGAGC	63404	62020	125424	1.3028e-05	3.9883	ACTCGAGC	15386	14238	29624	9.67082e-06	2.96056	ACTCGAGC	126491	126063	252554	3.32844e-05	10.1895	ACTCGAGC	11144	11138	22282	2.64659e-05	8.10211	ACTCGAGC	249141	249114	498255	1.41891e-05	4.34377	ACTCGAGC	91018
ACTCGAGG	4944	4982	9926	5.14581e-06		ACTCGAGG	1716	1893	3609	1.13877e-05	2.21301	ACTCGAGG	28	26	54	1.43693e-05	2.79243	ACTCGAGG	54998	55121	110119	1.14382e-05	2.22282	ACTCGAGG	12076	11719	23795	7.76793e-06	1.50956	ACTCGAGG	118323	117886	236209	3.11303e-05	6.04964	ACTCGAGG	11177	11164	22341	2.6536e-05	5.15681	ACTCGAGG	229662	229324	458986	1.30708e-05	2.5401	ACTCGAGG	87577
ACTCGAGT	4152	4152	8304	4.30494e-06		ACTCGAGT	1491	1491	2982	9.40933e-06	2.18571	ACTCGAGT	26	31	57	1.51676e-05	3.52331	ACTCGAGT	30618	30618	61236	6.36066e-06	1.47753	ACTCGAGT	8170	8170	16340	5.33423e-06	1.2391	ACTCGAGT	93367	93367	186734	2.46099e-05	5.71668	ACTCGAGT	8952	8952	17904	2.12658e-05	4.93987	ACTCGAGT	321450	321450	642900	1.83083e-05	4.25286	ACTCGAGT	127802
ACTCGATA	2979	3063	6042	3.13228e-06		ACTCGATA	3034	3542	6576	2.07497e-05	6.62449	ACTCGATA	29	23	52	1.38371e-05	4.4176	ACTCGATA	68164	68899	137063	1.42369e-05	4.54523	ACTCGATA	21830	22787	44617	1.45653e-05	4.65007	ACTCGATA	87759	88541	176300	2.32348e-05	7.41787	ACTCGATA	9560	9978	19538	2.32067e-05	7.40888	ACTCGATA	350558	351093	701651	1.99814e-05	6.37919	ACTCGATA	130242
ACTCGATC	2270	2369	4639	2.40494e-06		ACTCGATC	4394	4450	8844	2.79061e-05	11.6037	ACTCGATC	18	34	52	1.38371e-05	5.75363	ACTCGATC	125974	124950	250924	2.60638e-05	10.8376	ACTCGATC	29089	28318	57407	1.87406e-05	7.79257	ACTCGATC	123587	123847	247434	3.26097e-05	13.5595	ACTCGATC	12263	12194	24457	2.90493e-05	12.079	ACTCGATC	329732	329676	659408	1.87784e-05	7.80827	ACTCGATC	114836
ACTCGATG	4014	3998	8012	4.15356e-06		ACTCGATG	4956	5577	10533	3.32356e-05	8.00171	ACTCGATG	31	20	51	1.3571e-05	3.26733	ACTCGATG	123452	123813	247265	2.56837e-05	6.18355	ACTCGATG	31123	31059	62182	2.02994e-05	4.88724	ACTCGATG	125304	125680	250984	3.30775e-05	7.96366	ACTCGATG	12482	12458	24940	2.9623e-05	7.13196	ACTCGATG	343281	343540	686821	1.9559e-05	4.70899	ACTCGATG	138797
ACTCGATT	4075	4112	8187	4.24428e-06		ACTCGATT	2894	2922	5816	1.83517e-05	4.32386	ACTCGATT	17	17	34	9.04735e-06	2.13166	ACTCGATT	69882	69720	139602	1.45006e-05	3.41651	ACTCGATT	23096	22638	45734	1.493e-05	3.51767	ACTCGATT	90960	91102	182062	2.39942e-05	5.6533	ACTCGATT	9485	9284	18769	2.22933e-05	5.25254	ACTCGATT	504241	503588	1007829	2.87006e-05	6.76218	ACTCGATT	171907
ACTCGCAA	2683	2734	5417	2.80827e-06		ACTCGCAA	2982	2553	5535	1.7465e-05	6.21914	ACTCGCAA	39	38	77	2.04896e-05	7.29617	ACTCGCAA	58160	57126	115286	1.19749e-05	4.26416	ACTCGCAA	20752	19848	40600	1.3254e-05	4.71962	ACTCGCAA	95699	95999	191698	2.52641e-05	8.99635	ACTCGCAA	9715	9691	19406	2.30499e-05	8.20787	ACTCGCAA	313975	314031	628006	1.78841e-05	6.36839	ACTCGCAA	128086
ACTCGCAC	2863	2745	5608	2.90728e-06		ACTCGCAC	2699	2418	5117	1.61461e-05	5.55366	ACTCGCAC	32	35	67	1.78286e-05	6.13239	ACTCGCAC	55607	55552	111159	1.15462e-05	3.97148	ACTCGCAC	16782	16798	33580	1.09623e-05	3.77062	ACTCGCAC	83501	84006	167507	2.2076e-05	7.59333	ACTCGCAC	7249	7088	14337	1.70291e-05	5.85738	ACTCGCAC	214116	213820	427936	1.21866e-05	4.19175	ACTCGCAC	87857
ACTCGCAG	4893	4774	9667	5.01154e-06		ACTCGCAG	3044	2390	5434	1.71463e-05	3.42137	ACTCGCAG	50	18	68	1.80947e-05	3.61061	ACTCGCAG	68671	69163	137834	1.4317e-05	2.85681	ACTCGCAG	19892	20951	40843	1.33333e-05	2.66052	ACTCGCAG	100983	101597	202580	2.66983e-05	5.32736	ACTCGCAG	9771	9962	19733	2.34383e-05	4.67686	ACTCGCAG	227731	228544	456275	1.29936e-05	2.59274	ACTCGCAG	89539
ACTCGCAT	3089	3202	6291	3.26136e-06		ACTCGCAT	2073	2268	4341	1.36975e-05	4.19993	ACTCGCAT	28	20	48	1.27727e-05	3.91638	ACTCGCAT	49818	49348	99166	1.03005e-05	3.15834	ACTCGCAT	18472	18051	36523	1.1923e-05	3.65584	ACTCGCAT	80735	81526	162261	2.13846e-05	6.55695	ACTCGCAT	8200	8642	16842	2.00044e-05	6.13377	ACTCGCAT	281435	281728	563163	1.60376e-05	4.91744	ACTCGCAT	114438
ACTCGCCA	4269	4426	8695	4.50764e-06		ACTCGCCA	3142	3491	6633	2.09296e-05	4.64314	ACTCGCCA	25	50	75	1.99574e-05	4.42746	ACTCGCCA	101726	101648	203374	2.11247e-05	4.68643	ACTCGCCA	30963	31009	61972	2.02309e-05	4.48814	ACTCGCCA	113767	114286	228053	3.00554e-05	6.66767	ACTCGCCA	11585	11754	23339	2.77214e-05	6.14987	ACTCGCCA	243729	243495	487224	1.3875e-05	3.07811	ACTCGCCA	93940
ACTCGCCC	5042	5178	10220	5.29822e-06		ACTCGCCC	2960	3207	6167	1.94592e-05	3.67278	ACTCGCCC	35	39	74	1.96913e-05	3.71659	ACTCGCCC	119363	118381	237744	2.46948e-05	4.66095	ACTCGCCC	29853	28415	58268	1.90217e-05	3.59021	ACTCGCCC	102549	102841	205390	2.70686e-05	5.109	ACTCGCCC	9967	9674	19641	2.3329e-05	4.40317	ACTCGCCC	165157	164946	330103	9.40056e-06	1.77429	ACTCGCCC	59421
ACTCGCCG	1363	1459	2822	1.46297e-06		ACTCGCCG	4680	5184	9864	3.11246e-05	21.2749	ACTCGCCG	49	31	80	2.12879e-05	14.5511	ACTCGCCG	216303	217999	434302	4.51115e-05	30.8355	ACTCGCCG	55712	57083	112795	3.68222e-05	25.1694	ACTCGCCG	105160	104996	210156	2.76967e-05	18.9318	ACTCGCCG	9918	9929	19847	2.35737e-05	16.1135	ACTCGCCG	176209	179803	356012	1.01384e-05	6.92999	ACTCGCCG	59350
ACTCGCCT	4667	4908	9575	4.96384e-06		ACTCGCCT	1997	2135	4132	1.3038e-05	2.62659	ACTCGCCT	15	25	40	1.06439e-05	2.14429	ACTCGCCT	71385	72204	143589	1.49148e-05	3.00468	ACTCGCCT	21566	23225	44791	1.46221e-05	2.94572	ACTCGCCT	86978	87857	174835	2.30417e-05	4.64191	ACTCGCCT	8702	8623	17325	2.05781e-05	4.1456	ACTCGCCT	240369	241442	481811	1.37208e-05	2.76416	ACTCGCCT	94743
ACTCGCGA	600	552	1152	5.97217e-07		ACTCGCGA	2203	2200	4403	1.38931e-05	23.2631	ACTCGCGA	20	77	97	2.58116e-05	43.2198	ACTCGCGA	63323	64368	127691	1.32634e-05	22.2087	ACTCGCGA	19416	19440	38856	1.26846e-05	21.2396	ACTCGCGA	74809	75200	150009	1.97699e-05	33.1034	ACTCGCGA	7442	7350	14792	1.75695e-05	29.419	ACTCGCGA	188389	189448	377837	1.07599e-05	18.0168	ACTCGCGA	66780
ACTCGCGC	1063	1141	2204	1.14259e-06		ACTCGCGC	3272	3858	7130	2.24978e-05	19.6902	ACTCGCGC	66	44	110	2.92708e-05	25.618	ACTCGCGC	130483	129540	260023	2.70089e-05	23.6383	ACTCGCGC	33509	33160	66669	2.17642e-05	19.0481	ACTCGCGC	87687	87672	175359	2.31108e-05	20.2267	ACTCGCGC	7561	7601	15162	1.8009e-05	15.7615	ACTCGCGC	143785	143378	287163	8.17773e-06	7.15718	ACTCGCGC	48983
ACTCGCGG	1276	1310	2586	1.34063e-06		ACTCGCGG	2949	3276	6225	1.96422e-05	14.6515	ACTCGCGG	44	26	70	1.86269e-05	13.8942	ACTCGCGG	104831	103560	208391	2.16458e-05	16.1461	ACTCGCGG	26480	25360	51840	1.69233e-05	12.6234	ACTCGCGG	68845	68681	137526	1.81247e-05	13.5196	ACTCGCGG	6830	6831	13661	1.62261e-05	12.1034	ACTCGCGG	126099	126439	252538	7.19169e-06	5.36442	ACTCGCGG	52535
ACTCGCGT	845	762	1607	8.33096e-07		ACTCGCGT	1929	1913	3842	1.21229e-05	14.5517	ACTCGCGT	28	16	44	1.17083e-05	14.054	ACTCGCGT	46863	46457	93320	9.69327e-06	11.6352	ACTCGCGT	14652	14046	28698	9.36852e-06	11.2454	ACTCGCGT	53013	52627	105640	1.39224e-05	16.7117	ACTCGCGT	4918	4906	9824	1.16687e-05	14.0064	ACTCGCGT	149516	149926	299442	8.52741e-06	10.2358	ACTCGCGT	60186
ACTCGCTA	2462	2584	5046	2.61593e-06		ACTCGCTA	2008	1929	3937	1.24227e-05	4.74886	ACTCGCTA	16	47	63	1.67642e-05	6.4085	ACTCGCTA	45318	44925	90243	9.37366e-06	3.58329	ACTCGCTA	18194	17517	35711	1.16579e-05	4.45651	ACTCGCTA	57240	57381	114621	1.51061e-05	5.77463	ACTCGCTA	5793	5800	11593	1.37698e-05	5.26383	ACTCGCTA	203829	204001	407830	1.1614e-05	4.43973	ACTCGCTA	81181
ACTCGCTC	4628	4736	9364	4.85446e-06		ACTCGCTC	2845	2992	5837	1.84179e-05	3.79402	ACTCGCTC	51	56	107	2.84726e-05	5.86524	ACTCGCTC	90158	90182	180340	1.87321e-05	3.85875	ACTCGCTC	25154	24674	49828	1.62665e-05	3.35083	ACTCGCTC	120568	120426	240994	3.17609e-05	6.54263	ACTCGCTC	11273	11033	22306	2.64944e-05	5.45775	ACTCGCTC	257967	257749	515716	1.46864e-05	3.02534	ACTCGCTC	90791
ACTCGCTG	6243	6387	12630	6.54761e-06		ACTCGCTG	4202	3738	7940	2.50537e-05	3.82639	ACTCGCTG	56	27	83	2.20862e-05	3.37317	ACTCGCTG	140642	142509	283151	2.94113e-05	4.49191	ACTCGCTG	42553	43413	85966	2.80638e-05	4.28611	ACTCGCTG	109662	109507	219169	2.88846e-05	4.41147	ACTCGCTG	11259	11154	22413	2.66215e-05	4.06584	ACTCGCTG	269629	271076	540705	1.5398e-05	2.3517	ACTCGCTG	103280
ACTCGCTT	4487	4371	8858	4.59214e-06		ACTCGCTT	2410	2650	5060	1.59662e-05	3.47685	ACTCGCTT	31	38	69	1.83608e-05	3.99831	ACTCGCTT	77463	78465	155928	1.61964e-05	3.52699	ACTCGCTT	28879	29775	58654	1.91477e-05	4.16967	ACTCGCTT	93994	93816	187810	2.47517e-05	5.39002	ACTCGCTT	9626	9583	19209	2.28159e-05	4.96847	ACTCGCTT	326621	327571	654192	1.86299e-05	4.0569	ACTCGCTT	139998
ACTCGGAA	5117	5021	10138	5.25571e-06		ACTCGGAA	2565	2499	5064	1.59788e-05	3.04028	ACTCGGAA	37	37	74	1.96913e-05	3.74665	ACTCGGAA	51204	52330	103534	1.07542e-05	2.04619	ACTCGGAA	15487	15984	31471	1.02738e-05	1.95478	ACTCGGAA	95011	95436	190447	2.50993e-05	4.77562	ACTCGGAA	9674	9731	19405	2.30487e-05	4.38545	ACTCGGAA	370940	372021	742961	2.11578e-05	4.02567	ACTCGGAA	146840
ACTCGGAC	3019	2750	5769	2.99075e-06		ACTCGGAC	2950	2744	5694	1.79667e-05	6.00743	ACTCGGAC	49	70	119	3.16657e-05	10.5879	ACTCGGAC	51484	51843	103327	1.07327e-05	3.58864	ACTCGGAC	12773	12788	25561	8.34444e-06	2.79009	ACTCGGAC	100518	100245	200763	2.64588e-05	8.84689	ACTCGGAC	8893	8961	17854	2.12065e-05	7.09068	ACTCGGAC	209898	210024	419922	1.19584e-05	3.99846	ACTCGGAC	74654
ACTCGGAG	5931	6031	11962	6.20131e-06		ACTCGGAG	2414	2430	4844	1.52846e-05	2.46474	ACTCGGAG	52	25	77	2.04896e-05	3.30408	ACTCGGAG	48064	47372	95436	9.91306e-06	1.59854	ACTCGGAG	11490	10698	22188	7.24332e-06	1.16803	ACTCGGAG	104217	104121	208338	2.74571e-05	4.42764	ACTCGGAG	10322	10161	20483	2.43291e-05	3.92322	ACTCGGAG	218884	218400	437284	1.24528e-05	2.0081	ACTCGGAG	82633
ACTCGGAT	3492	3398	6890	3.57189e-06		ACTCGGAT	2349	2227	4576	1.4439e-05	4.04239	ACTCGGAT	30	19	49	1.30388e-05	3.6504	ACTCGGAT	46808	46989	93797	9.74282e-06	2.72763	ACTCGGAT	14578	14730	29308	9.56766e-06	2.6786	ACTCGGAT	89903	90327	180230	2.37528e-05	6.6499	ACTCGGAT	9212	9334	18546	2.20284e-05	6.16715	ACTCGGAT	267795	268148	535943	1.52624e-05	4.27291	ACTCGGAT	107746
ACTCGGCA	5052	5049	10101	5.23653e-06		ACTCGGCA	2799	3303	6102	1.92541e-05	3.67688	ACTCGGCA	32	42	74	1.96913e-05	3.76037	ACTCGGCA	103305	101662	204967	2.12902e-05	4.0657	ACTCGGCA	28709	27956	56665	1.84984e-05	3.53257	ACTCGGCA	108981	108433	217414	2.86533e-05	5.47181	ACTCGGCA	10484	10610	21094	2.50548e-05	4.78462	ACTCGGCA	247840	247283	495123	1.40999e-05	2.69261	ACTCGGCA	94832
ACTCGGCC	5613	5904	11517	5.97061e-06		ACTCGGCC	3247	4030	7277	2.29617e-05	3.84578	ACTCGGCC	45	36	81	2.1554e-05	3.61001	ACTCGGCC	142119	141538	283657	2.94638e-05	4.93481	ACTCGGCC	30197	29787	59984	1.95819e-05	3.27972	ACTCGGCC	121368	121587	242955	3.20194e-05	5.36283	ACTCGGCC	11439	11503	22942	2.72498e-05	4.56399	ACTCGGCC	201480	203113	404593	1.15219e-05	1.92976	ACTCGGCC	71119
ACTCGGCG	1486	1550	3036	1.57391e-06		ACTCGGCG	4754	5141	9895	3.12224e-05	19.8374	ACTCGGCG	41	10	51	1.3571e-05	8.62247	ACTCGGCG	203245	201912	405157	4.20842e-05	26.7385	ACTCGGCG	53292	51640	104932	3.42553e-05	21.7644	ACTCGGCG	109328	109612	218940	2.88544e-05	18.3329	ACTCGGCG	9940	9952	19892	2.36271e-05	15.0117	ACTCGGCG	166967	166844	333811	9.50615e-06	6.03982	ACTCGGCG	55330
ACTCGGCT	5158	5122	10280	5.32933e-06		ACTCGGCT	1931	2049	3980	1.25584e-05	2.35647	ACTCGGCT	20	25	45	1.19744e-05	2.24689	ACTCGGCT	69127	69039	138166	1.43515e-05	2.69292	ACTCGGCT	19699	19806	39505	1.28965e-05	2.41991	ACTCGGCT	91424	91645	183069	2.41269e-05	4.5272	ACTCGGCT	9244	9208	18452	2.19167e-05	4.11248	ACTCGGCT	235651	237079	472730	1.34622e-05	2.52607	ACTCGGCT	98067
ACTCGGGA	5925	5849	11774	6.10384e-06		ACTCGGGA	2053	2002	4055	1.2795e-05	2.09623	ACTCGGGA	15	39	54	1.43693e-05	2.35414	ACTCGGGA	43900	44423	88323	9.17422e-06	1.50302	ACTCGGGA	10641	10904	21545	7.03341e-06	1.15229	ACTCGGGA	81080	80796	161876	2.13339e-05	3.49515	ACTCGGGA	8815	8722	17537	2.08299e-05	3.41259	ACTCGGGA	206927	205866	412793	1.17554e-05	1.9259	ACTCGGGA	87883
ACTCGGGC	5036	5223	10259	5.31844e-06		ACTCGGGC	3139	3127	6266	1.97716e-05	3.71755	ACTCGGGC	50	54	104	2.76743e-05	5.20345	ACTCGGGC	85269	89151	174420	1.81172e-05	3.40649	ACTCGGGC	18839	22273	41112	1.34211e-05	2.5235	ACTCGGGC	94324	93595	187919	2.47661e-05	4.65665	ACTCGGGC	8635	8532	17167	2.03905e-05	3.83392	ACTCGGGC	133643	132953	266596	7.59203e-06	1.42749	ACTCGGGC	49037
ACTCGGGG	7104	7042	14146	7.33353e-06		ACTCGGGG	1832	2443	4275	1.34892e-05	1.83939	ACTCGGGG	46	41	87	2.31506e-05	3.15681	ACTCGGGG	54802	54325	109127	1.13352e-05	1.54566	ACTCGGGG	12193	11686	23879	7.79535e-06	1.06297	ACTCGGGG	70992	70898	141890	1.86999e-05	2.54992	ACTCGGGG	7727	7608	15335	1.82145e-05	2.48372	ACTCGGGG	142187	140764	282951	8.05778e-06	1.09876	ACTCGGGG	68694
ACTCGGGT	4537	4262	8799	4.56155e-06		ACTCGGGT	1918	1889	3807	1.20125e-05	2.63343	ACTCGGGT	17	21	38	1.01117e-05	2.21673	ACTCGGGT	40502	41761	82263	8.54476e-06	1.87321	ACTCGGGT	11348	11938	23286	7.60177e-06	1.66649	ACTCGGGT	63648	63258	126906	1.67251e-05	3.66654	ACTCGGGT	6423	6340	12763	1.51595e-05	3.32332	ACTCGGGT	165980	164571	330551	9.41332e-06	2.06362	ACTCGGGT	66429
ACTCGGTA	3210	3247	6457	3.34742e-06		ACTCGGTA	2282	2456	4738	1.49502e-05	4.46618	ACTCGGTA	26	34	60	1.59659e-05	4.76962	ACTCGGTA	53029	51973	105002	1.09067e-05	3.25824	ACTCGGTA	19130	18070	37200	1.2144e-05	3.62788	ACTCGGTA	71563	71758	143321	1.88885e-05	5.6427	ACTCGGTA	7611	7749	15360	1.82442e-05	5.45021	ACTCGGTA	213754	215391	429145	1.2221e-05	3.65088	ACTCGGTA	85502
ACTCGGTC	3368	3354	6722	3.4848e-06		ACTCGGTC	3387	3640	7027	2.21728e-05	6.36272	ACTCGGTC	26	41	67	1.78286e-05	5.11611	ACTCGGTC	83304	83594	166898	1.73359e-05	4.97472	ACTCGGTC	20790	20642	41432	1.35256e-05	3.8813	ACTCGGTC	103650	104177	207827	2.73898e-05	7.85979	ACTCGGTC	9780	9820	19600	2.32803e-05	6.68053	ACTCGGTC	221489	221111	442600	1.26042e-05	3.61691	ACTCGGTC	83796
ACTCGGTG	5533	5424	10957	5.6803e-06		ACTCGGTG	4382	4222	8604	2.71488e-05	4.77948	ACTCGGTG	40	28	68	1.80947e-05	3.18552	ACTCGGTG	130456	129311	259767	2.69823e-05	4.75016	ACTCGGTG	37612	36871	74483	2.43151e-05	4.28061	ACTCGGTG	99845	100279	200124	2.63746e-05	4.64318	ACTCGGTG	9845	9606	19451	2.31033e-05	4.06727	ACTCGGTG	271758	271381	543139	1.54673e-05	2.72298	ACTCGGTG	103525
ACTCGGTT	3892	3956	7848	4.06854e-06		ACTCGGTT	2480	2569	5049	1.59315e-05	3.91578	ACTCGGTT	33	26	59	1.56998e-05	3.85884	ACTCGGTT	61435	59312	120747	1.25421e-05	3.08272	ACTCGGTT	21258	19706	40964	1.33728e-05	3.28688	ACTCGGTT	69157	69300	138457	1.82474e-05	4.48501	ACTCGGTT	7621	7751	15372	1.82584e-05	4.48771	ACTCGGTT	290396	290690	581086	1.6548e-05	4.0673	ACTCGGTT	121582
ACTCGTAA	3311	3425	6736	3.49206e-06		ACTCGTAA	3152	3646	6798	2.14502e-05	6.14258	ACTCGTAA	30	32	62	1.64981e-05	4.72447	ACTCGTAA	47166	47884	95050	9.87297e-06	2.82726	ACTCGTAA	17937	18577	36514	1.19201e-05	3.41348	ACTCGTAA	54741	55388	110129	1.45141e-05	4.1563	ACTCGTAA	5512	5606	11118	1.32056e-05	3.78162	ACTCGTAA	337225	337948	675173	1.92273e-05	5.50602	ACTCGTAA	129824
ACTCGTAC	1926	2012	3938	2.04153e-06		ACTCGTAC	2798	3127	5925	1.86956e-05	9.15765	ACTCGTAC	26	19	45	1.19744e-05	5.86543	ACTCGTAC	43899	44181	88080	9.14898e-06	4.48144	ACTCGTAC	13055	13153	26208	8.55566e-06	4.19081	ACTCGTAC	87752	87769	175521	2.31322e-05	11.3308	ACTCGTAC	7242	7399	14641	1.73901e-05	8.51821	ACTCGTAC	244753	245194	489947	1.39525e-05	6.83437	ACTCGTAC	95236
ACTCGTAG	2900	2917	5817	3.01563e-06		ACTCGTAG	2241	3188	5429	1.71305e-05	5.68058	ACTCGTAG	27	27	54	1.43693e-05	4.76495	ACTCGTAG	45777	46023	91800	9.53538e-06	3.16198	ACTCGTAG	11994	11995	23989	7.83126e-06	2.59689	ACTCGTAG	67015	67038	134053	1.7667e-05	5.85848	ACTCGTAG	6341	6487	12828	1.52367e-05	5.05258	ACTCGTAG	220122	219850	439972	1.25294e-05	4.15481	ACTCGTAG	84634
ACTCGTAT	3579	3696	7275	3.77148e-06		ACTCGTAT	2608	2558	5166	1.63007e-05	4.32208	ACTCGTAT	18	21	39	1.03778e-05	2.75166	ACTCGTAT	41680	41963	83643	8.68811e-06	2.30363	ACTCGTAT	16647	16481	33128	1.08147e-05	2.86749	ACTCGTAT	73236	73461	146697	1.93334e-05	5.1262	ACTCGTAT	7244	7354	14598	1.73391e-05	4.59741	ACTCGTAT	287061	288433	575494	1.63887e-05	4.34543	ACTCGTAT	109661
ACTCGTCA	3374	3365	6739	3.49361e-06		ACTCGTCA	3555	4290	7845	2.47539e-05	7.08548	ACTCGTCA	32	42	74	1.96913e-05	5.63637	ACTCGTCA	72091	73115	145206	1.50827e-05	4.31723	ACTCGTCA	21988	22724	44712	1.45963e-05	4.178	ACTCGTCA	115773	115910	231683	3.05338e-05	8.7399	ACTCGTCA	11632	11589	23221	2.75812e-05	7.89476	ACTCGTCA	399238	399826	799064	2.27555e-05	6.51345	ACTCGTCA	156577
ACTCGTCC	3145	3143	6288	3.25981e-06		ACTCGTCC	3128	4110	7238	2.28386e-05	7.00612	ACTCGTCC	36	52	88	2.34167e-05	7.18346	ACTCGTCC	84405	86442	170847	1.77461e-05	5.44391	ACTCGTCC	19975	21452	41427	1.35239e-05	4.14869	ACTCGTCC	118027	118545	236572	3.11781e-05	9.56441	ACTCGTCC	11195	11389	22584	2.68246e-05	8.2289	ACTCGTCC	346705	345076	691781	1.97003e-05	6.04339	ACTCGTCC	157157
ACTCGTCG	540	595	1135	5.88403e-07		ACTCGTCG	4876	6523	11399	3.59681e-05	61.1283	ACTCGTCG	36	50	86	2.28845e-05	38.8925	ACTCGTCG	156541	157296	313837	3.25987e-05	55.4019	ACTCGTCG	39421	38345	77766	2.53869e-05	43.1454	ACTCGTCG	128293	129089	257382	3.39207e-05	57.6487	ACTCGTCG	11892	11989	23881	2.83651e-05	48.207	ACTCGTCG	247380	246557	493937	1.40662e-05	23.9056	ACTCGTCG	93534
ACTCGTCT	4235	4205	8440	4.37544e-06		ACTCGTCT	2725	3218	5943	1.87524e-05	4.28583	ACTCGTCT	22	29	51	1.3571e-05	3.10164	ACTCGTCT	48943	48288	97231	1.00995e-05	2.30823	ACTCGTCT	15739	14671	30410	9.92741e-06	2.26889	ACTCGTCT	104575	103880	208455	2.74726e-05	6.27881	ACTCGTCT	10288	10337	20625	2.44978e-05	5.59893	ACTCGTCT	328651	330210	658861	1.87628e-05	4.28821	ACTCGTCT	129861
ACTCGTGA	4207	4290	8497	4.40499e-06		ACTCGTGA	2990	2844	5834	1.84085e-05	4.179	ACTCGTGA	21	26	47	1.25066e-05	2.8392	ACTCGTGA	51509	51500	103009	1.06997e-05	2.42899	ACTCGTGA	16985	16934	33919	1.10729e-05	2.51372	ACTCGTGA	70337	69616	139953	1.84446e-05	4.1872	ACTCGTGA	6927	6971	13898	1.65076e-05	3.74748	ACTCGTGA	302523	301971	604494	1.72146e-05	3.90797	ACTCGTGA	121910
ACTCGTGC	3400	3350	6750	3.49932e-06		ACTCGTGC	2871	2863	5734	1.80929e-05	5.17042	ACTCGTGC	27	33	60	1.59659e-05	4.56258	ACTCGTGC	62476	62315	124791	1.29622e-05	3.70421	ACTCGTGC	17943	17534	35477	1.15815e-05	3.30966	ACTCGTGC	81454	80963	162417	2.14052e-05	6.11696	ACTCGTGC	7283	7244	14527	1.72547e-05	4.93089	ACTCGTGC	208105	208038	416143	1.18508e-05	3.3866	ACTCGTGC	84063
ACTCGTGG	5077	5078	10155	5.26453e-06		ACTCGTGG	3353	2792	6145	1.93898e-05	3.6831	ACTCGTGG	31	27	58	1.54337e-05	2.93164	ACTCGTGG	61943	61742	123685	1.28473e-05	2.44036	ACTCGTGG	16486	16170	32656	1.06606e-05	2.02499	ACTCGTGG	84597	84513	169110	2.22872e-05	4.23347	ACTCGTGG	8394	8448	16842	2.00044e-05	3.79985	ACTCGTGG	207567	205642	413209	1.17672e-05	2.23519	ACTCGTGG	84926
ACTCGTGT	5069	5002	10071	5.22098e-06		ACTCGTGT	2531	2326	4857	1.53257e-05	2.9354	ACTCGTGT	25	47	72	1.91591e-05	3.66964	ACTCGTGT	31429	30968	62397	6.48126e-06	1.24139	ACTCGTGT	10973	10482	21455	7.00403e-06	1.34152	ACTCGTGT	62634	62066	124700	1.64344e-05	3.14776	ACTCGTGT	6015	5885	11900	1.41345e-05	2.70725	ACTCGTGT	245035	243775	488810	1.39202e-05	2.6662	ACTCGTGT	102534
ACTCGTTA	3364	3335	6699	3.47288e-06		ACTCGTTA	2792	3015	5807	1.83233e-05	5.2761	ACTCGTTA	45	34	79	2.10218e-05	6.05314	ACTCGTTA	46724	45869	92593	9.61775e-06	2.76939	ACTCGTTA	18704	17902	36606	1.19501e-05	3.44098	ACTCGTTA	49616	49741	99357	1.30944e-05	3.77048	ACTCGTTA	5592	5540	11132	1.32223e-05	3.80729	ACTCGTTA	289153	289702	578855	1.64844e-05	4.74662	ACTCGTTA	119972
ACTCGTTC	4055	4014	8069	4.18311e-06		ACTCGTTC	4156	4094	8250	2.60318e-05	6.22309	ACTCGTTC	30	38	68	1.80947e-05	4.32566	ACTCGTTC	79577	80720	160297	1.66503e-05	3.98036	ACTCGTTC	22893	23729	46622	1.52199e-05	3.63841	ACTCGTTC	108015	107803	215818	2.84429e-05	6.79948	ACTCGTTC	10588	10766	21354	2.53637e-05	6.06335	ACTCGTTC	383393	383118	766511	2.18284e-05	5.21823	ACTCGTTC	153889
ACTCGTTG	3202	3118	6320	3.2764e-06		ACTCGTTG	3499	4474	7973	2.51578e-05	7.6785	ACTCGTTG	28	63	91	2.4215e-05	7.39073	ACTCGTTG	85277	84610	169887	1.76464e-05	5.38591	ACTCGTTG	27024	26365	53389	1.7429e-05	5.31955	ACTCGTTG	103670	103001	206671	2.72375e-05	8.31323	ACTCGTTG	10270	10289	20559	2.44194e-05	7.45312	ACTCGTTG	335614	334239	669853	1.90758e-05	5.8222	ACTCGTTG	140070
ACTCGTTT	6010	6059	12069	6.25678e-06		ACTCGTTT	3537	3952	7489	2.36306e-05	3.7768	ACTCGTTT	41	55	96	2.55455e-05	4.08285	ACTCGTTT	77849	76439	154288	1.60261e-05	2.5614	ACTCGTTT	31049	29739	60788	1.98444e-05	3.17166	ACTCGTTT	84373	84663	169036	2.22775e-05	3.56054	ACTCGTTT	9244	9045	18289	2.17231e-05	3.47194	ACTCGTTT	565737	564115	1129852	3.21755e-05	5.14251	ACTCGTTT	236105
AGACGAAA	7043	7153	14196	7.35945e-06		AGACGAAA	5486	4399	9885	3.11909e-05	4.23821	AGACGAAA	76	43	119	3.16657e-05	4.30273	AGACGAAA	111224	111614	222838	2.31465e-05	3.14514	AGACGAAA	39612	39706	79318	2.58935e-05	3.51841	AGACGAAA	132550	132313	264863	3.49067e-05	4.74311	AGACGAAA	14628	14730	29358	3.48706e-05	4.7382	AGACGAAA	793243	793481	1586724	4.51862e-05	6.13988	AGACGAAA	308681
AGACGAAC	3255	3344	6599	3.42103e-06		AGACGAAC	4342	3933	8275	2.61107e-05	7.63241	AGACGAAC	44	48	92	2.44811e-05	7.15604	AGACGAAC	105954	103579	209533	2.17645e-05	6.36195	AGACGAAC	32419	30595	63014	2.05711e-05	6.01311	AGACGAAC	106167	106248	212415	2.79945e-05	8.18304	AGACGAAC	11102	11213	22315	2.65051e-05	7.74769	AGACGAAC	379850	379746	759596	2.16315e-05	6.32309	AGACGAAC	161242
AGACGAAG	7060	7037	14097	7.30813e-06		AGACGAAG	6646	5068	11714	3.69621e-05	5.05767	AGACGAAG	90	38	128	3.40606e-05	4.66065	AGACGAAG	138840	139939	278779	2.89571e-05	3.96232	AGACGAAG	39135	40327	79462	2.59405e-05	3.54955	AGACGAAG	168451	168622	337073	4.44233e-05	6.07862	AGACGAAG	17850	17706	35556	4.22324e-05	5.77882	AGACGAAG	533577	530011	1063588	3.02885e-05	4.14449	AGACGAAG	198033
AGACGAAT	5290	5181	10471	5.42835e-06		AGACGAAT	3780	3515	7295	2.30185e-05	4.24042	AGACGAAT	47	50	97	2.58116e-05	4.75496	AGACGAAT	80035	80198	160233	1.66436e-05	3.06606	AGACGAAT	29466	29391	58857	1.9214e-05	3.53957	AGACGAAT	103831	103991	207822	2.73891e-05	5.04558	AGACGAAT	11568	11454	23022	2.73449e-05	5.03742	AGACGAAT	557522	555504	1113026	3.16964e-05	5.83905	AGACGAAT	210647
AGACGACA	5605	5491	11096	5.75236e-06		AGACGACA	4403	4065	8468	2.67197e-05	4.645	AGACGACA	67	28	95	2.52794e-05	4.39461	AGACGACA	67760	68159	135919	1.41181e-05	2.45431	AGACGACA	19955	20030	39985	1.30532e-05	2.26919	AGACGACA	135837	135457	271294	3.57542e-05	6.21558	AGACGACA	13847	13726	27573	3.27504e-05	5.69339	AGACGACA	381471	380780	762251	2.17071e-05	3.7736	AGACGACA	156647
AGACGACC	3287	3232	6519	3.37956e-06		AGACGACC	3992	4133	8125	2.56374e-05	7.58602	AGACGACC	54	65	119	3.16657e-05	9.36978	AGACGACC	105913	105562	211475	2.19662e-05	6.49971	AGACGACC	25948	25247	51195	1.67127e-05	4.94523	AGACGACC	108975	108979	217954	2.87245e-05	8.49946	AGACGACC	11013	11100	22113	2.62652e-05	7.77177	AGACGACC	234118	235015	469133	1.33598e-05	3.95312	AGACGACC	93187
AGACGACG	1285	1363	2648	1.37277e-06		AGACGACG	6243	5824	12067	3.80759e-05	27.7366	AGACGACG	91	39	130	3.45928e-05	25.1993	AGACGACG	148638	147702	296340	3.07812e-05	22.4227	AGACGACG	37084	36353	73437	2.39737e-05	17.4637	AGACGACG	148493	148339	296832	3.91199e-05	28.4971	AGACGACG	14370	14410	28780	3.4184e-05	24.9015	AGACGACG	336703	334550	671253	1.91157e-05	13.9249	AGACGACG	120750
AGACGACT	4227	4295	8522	4.41795e-06		AGACGACT	2842	2562	5404	1.70516e-05	3.85963	AGACGACT	47	47	94	2.50133e-05	5.66174	AGACGACT	46595	46781	93376	9.69909e-06	2.19538	AGACGACT	14066	14313	28379	9.26439e-06	2.09699	AGACGACT	100793	100684	201477	2.65529e-05	6.01024	AGACGACT	9960	9906	19866	2.35962e-05	5.34099	AGACGACT	318455	318197	636652	1.81304e-05	4.10379	AGACGACT	121447
AGACGAGA	7138	7150	14288	7.40714e-06		AGACGAGA	3954	3299	7253	2.28859e-05	3.08971	AGACGAGA	44	44	88	2.34167e-05	3.16136	AGACGAGA	64933	65524	130457	1.35507e-05	1.82941	AGACGAGA	18996	19316	38312	1.2507e-05	1.68851	AGACGAGA	164542	163519	328061	4.32356e-05	5.83701	AGACGAGA	17449	16983	34432	4.08973e-05	5.52133	AGACGAGA	463576	466002	929578	2.64722e-05	3.57387	AGACGAGA	155636
AGACGAGC	4054	3898	7952	4.12245e-06		AGACGAGC	3554	3303	6857	2.16364e-05	5.24843	AGACGAGC	58	62	120	3.19318e-05	7.74583	AGACGAGC	101154	101681	202835	2.10687e-05	5.11073	AGACGAGC	24667	25551	50218	1.63938e-05	3.9767	AGACGAGC	140614	140689	281303	3.70733e-05	8.99302	AGACGAGC	13557	13561	27118	3.221e-05	7.8133	AGACGAGC	270533	270030	540563	1.5394e-05	3.73418	AGACGAGC	99426
AGACGAGG	8136	8210	16346	8.47405e-06		AGACGAGG	4034	3461	7495	2.36495e-05	2.79082	AGACGAGG	92	22	114	3.03352e-05	3.57978	AGACGAGG	82715	82160	164875	1.71258e-05	2.02097	AGACGAGG	18665	17993	36658	1.19671e-05	1.4122	AGACGAGG	160172	160699	320871	4.2288e-05	4.9903	AGACGAGG	16323	16590	32913	3.90931e-05	4.61327	AGACGAGG	316283	316964	633247	1.80334e-05	2.12807	AGACGAGG	103608
AGACGAGT	4205	4235	8440	4.37544e-06		AGACGAGT	3218	2725	5943	1.87524e-05	4.28583	AGACGAGT	50	76	126	3.35284e-05	7.66287	AGACGAGT	48288	48943	97231	1.00995e-05	2.30823	AGACGAGT	14671	15739	30410	9.92741e-06	2.26889	AGACGAGT	103880	104575	208455	2.74726e-05	6.27881	AGACGAGT	10337	10288	20625	2.44978e-05	5.59893	AGACGAGT	330210	328651	658861	1.87628e-05	4.28821	AGACGAGT	129535
AGACGATA	4035	4344	8379	4.34382e-06		AGACGATA	4389	3751	8140	2.56847e-05	5.91294	AGACGATA	95	46	141	3.75199e-05	8.63754	AGACGATA	89028	90548	179576	1.86528e-05	4.2941	AGACGATA	33668	34899	68567	2.23838e-05	5.15304	AGACGATA	99883	99853	199736	2.63235e-05	6.05999	AGACGATA	11427	11426	22853	2.71441e-05	6.24891	AGACGATA	377459	376013	753472	2.14571e-05	4.93969	AGACGATA	150314
AGACGATC	3011	3033	6044	3.13331e-06		AGACGATC	5130	4211	9341	2.94744e-05	9.40677	AGACGATC	52	96	148	3.93826e-05	12.569	AGACGATC	173441	173930	347371	3.60819e-05	11.5156	AGACGATC	42067	42888	84955	2.77337e-05	8.85125	AGACGATC	122245	122352	244597	3.22358e-05	10.2881	AGACGATC	12888	12998	25886	3.07466e-05	9.81282	AGACGATC	312523	312790	625313	1.78074e-05	5.68326	AGACGATC	118052
AGACGATG	6800	6979	13779	7.14327e-06		AGACGATG	6622	5436	12058	3.80475e-05	5.32634	AGACGATG	80	47	127	3.37945e-05	4.73096	AGACGATG	173833	174198	348031	3.61504e-05	5.06077	AGACGATG	48097	49026	97123	3.1706e-05	4.43859	AGACGATG	169400	170602	340002	4.48093e-05	6.27294	AGACGATG	17971	18224	36195	4.29914e-05	6.01844	AGACGATG	432977	433174	866151	2.46659e-05	3.45303	AGACGATG	169710
AGACGATT	4648	4540	9188	4.76322e-06		AGACGATT	4642	3724	8366	2.63979e-05	5.54202	AGACGATT	56	36	92	2.44811e-05	5.13961	AGACGATT	98131	97924	196055	2.03645e-05	4.27536	AGACGATT	35436	35368	70804	2.31141e-05	4.85263	AGACGATT	97376	97432	194808	2.5674e-05	5.39006	AGACGATT	10062	10187	20249	2.40512e-05	5.04935	AGACGATT	490675	490295	980970	2.79357e-05	5.86489	AGACGATT	181476
AGACGCAA	4780	4720	9500	4.92496e-06		AGACGCAA	3584	2982	6566	2.07182e-05	4.20677	AGACGCAA	40	44	84	2.23523e-05	4.53857	AGACGCAA	70804	70836	141640	1.47123e-05	2.9873	AGACGCAA	24592	24304	48896	1.59622e-05	3.24108	AGACGCAA	102722	102353	205075	2.70271e-05	5.48778	AGACGCAA	10558	10644	21202	2.51831e-05	5.11336	AGACGCAA	311955	311046	623001	1.77416e-05	3.60238	AGACGCAA	128214
AGACGCAC	4417	4423	8840	4.58281e-06		AGACGCAC	2974	2706	5680	1.79225e-05	3.91082	AGACGCAC	54	52	106	2.82065e-05	6.15484	AGACGCAC	69803	71590	141393	1.46867e-05	3.20473	AGACGCAC	20498	22694	43192	1.41001e-05	3.07674	AGACGCAC	82104	81555	163659	2.15688e-05	4.70647	AGACGCAC	7268	7175	14443	1.7155e-05	3.74333	AGACGCAC	220975	219113	440088	1.25327e-05	2.73472	AGACGCAC	103956
AGACGCAG	8966	9047	18013	9.33825e-06		AGACGCAG	4448	3573	8021	2.53093e-05	2.71028	AGACGCAG	120	28	148	3.93826e-05	4.21734	AGACGCAG	116698	115734	232432	2.4143e-05	2.58539	AGACGCAG	35182	34178	69360	2.26427e-05	2.42473	AGACGCAG	129067	129419	258486	3.40662e-05	3.64803	AGACGCAG	13037	13456	26493	3.14676e-05	3.36975	AGACGCAG	311248	311196	622444	1.77257e-05	1.89819	AGACGCAG	116599
AGACGCAT	4429	4472	8901	4.61443e-06		AGACGCAT	2836	2635	5471	1.72631e-05	3.7411	AGACGCAT	25	45	70	1.86269e-05	4.03666	AGACGCAT	68200	66555	134755	1.39972e-05	3.03335	AGACGCAT	25071	23959	49030	1.6006e-05	3.46867	AGACGCAT	83463	83286	166749	2.19761e-05	4.76247	AGACGCAT	8961	8993	17954	2.13252e-05	4.62142	AGACGCAT	274250	274086	548336	1.56153e-05	3.38402	AGACGCAT	113901
AGACGCCA	6760	7060	13820	7.16452e-06		AGACGCCA	3714	3557	7271	2.29427e-05	3.20227	AGACGCCA	61	48	109	2.90048e-05	4.04838	AGACGCCA	89787	88524	178311	1.85214e-05	2.58515	AGACGCCA	28604	27772	56376	1.84041e-05	2.56878	AGACGCCA	116751	117604	234355	3.0886e-05	4.31096	AGACGCCA	12161	12309	24470	2.90647e-05	4.05676	AGACGCCA	222894	224118	447012	1.27299e-05	1.77679	AGACGCCA	85656
AGACGCCC	5768	5651	11419	5.91981e-06		AGACGCCC	2867	3050	5917	1.86704e-05	3.15388	AGACGCCC	73	49	122	3.2464e-05	5.48397	AGACGCCC	105090	104606	209696	2.17814e-05	3.67941	AGACGCCC	26075	25372	51447	1.6795e-05	2.83708	AGACGCCC	87525	87586	175111	2.30781e-05	3.89846	AGACGCCC	8524	8584	17108	2.03204e-05	3.43261	AGACGCCC	129529	129180	258709	7.36742e-06	1.24454	AGACGCCC	45621
AGACGCCG	2393	2681	5074	2.63045e-06		AGACGCCG	4836	4540	9376	2.95848e-05	11.2471	AGACGCCG	133	25	158	4.20436e-05	15.9834	AGACGCCG	205158	205678	410836	4.26741e-05	16.2231	AGACGCCG	48232	47886	96118	3.13779e-05	11.9287	AGACGCCG	118211	116892	235103	3.09845e-05	11.7792	AGACGCCG	11370	11107	22477	2.66975e-05	10.1494	AGACGCCG	170883	168126	339009	9.65418e-06	3.67017	AGACGCCG	57546
AGACGCCT	5534	5471	11005	5.70518e-06		AGACGCCT	2354	2423	4777	1.50732e-05	2.64202	AGACGCCT	48	33	81	2.1554e-05	3.77797	AGACGCCT	57513	58500	116013	1.20504e-05	2.11219	AGACGCCT	16571	16946	33517	1.09417e-05	1.91785	AGACGCCT	85103	84723	169826	2.23816e-05	3.92303	AGACGCCT	8720	8713	17433	2.07064e-05	3.6294	AGACGCCT	193521	193979	387500	1.10351e-05	1.93422	AGACGCCT	76164
AGACGCGA	1123	1127	2250	1.16644e-06		AGACGCGA	2552	2455	5007	1.5799e-05	13.5446	AGACGCGA	29	76	105	2.79404e-05	23.9536	AGACGCGA	63559	62887	126446	1.31341e-05	11.26	AGACGCGA	19446	18778	38224	1.24783e-05	10.6978	AGACGCGA	86775	86671	173446	2.28587e-05	19.597	AGACGCGA	8346	8292	16638	1.97621e-05	16.9423	AGACGCGA	192336	191837	384173	1.09403e-05	9.37927	AGACGCGA	68806
AGACGCGC	1606	1634	3240	1.67967e-06		AGACGCGC	3831	3989	7820	2.4675e-05	14.6904	AGACGCGC	79	75	154	4.09792e-05	24.3971	AGACGCGC	149100	149120	298220	3.09765e-05	18.442	AGACGCGC	41637	42191	83828	2.73658e-05	16.2924	AGACGCGC	87351	86513	173864	2.29138e-05	13.6418	AGACGCGC	7530	7308	14838	1.76241e-05	10.4926	AGACGCGC	156747	158314	315061	8.9722e-06	5.34164	AGACGCGC	53675
AGACGCGG	2646	2383	5029	2.60712e-06		AGACGCGG	2957	3161	6118	1.93046e-05	7.40456	AGACGCGG	75	42	117	3.11335e-05	11.9417	AGACGCGG	112856	111783	224639	2.33335e-05	8.94993	AGACGCGG	30006	29215	59221	1.93328e-05	7.4154	AGACGCGG	87263	87058	174321	2.2974e-05	8.81202	AGACGCGG	8425	8499	16924	2.01018e-05	7.71036	AGACGCGG	140035	139738	279773	7.96728e-06	3.05597	AGACGCGG	47356
AGACGCGT	1120	1094	2214	1.14778e-06		AGACGCGT	2010	1986	3996	1.26089e-05	10.9855	AGACGCGT	55	25	80	2.12879e-05	18.5471	AGACGCGT	53727	53815	107542	1.11705e-05	9.73233	AGACGCGT	19331	19496	38827	1.26752e-05	11.0432	AGACGCGT	70342	70528	140870	1.85654e-05	16.1752	AGACGCGT	6264	6253	12517	1.48673e-05	12.9532	AGACGCGT	167948	167879	335827	9.56356e-06	8.33226	AGACGCGT	67494
AGACGCTA	3815	3835	7650	3.96589e-06		AGACGCTA	2703	1959	4662	1.47104e-05	3.70922	AGACGCTA	57	34	91	2.4215e-05	6.10581	AGACGCTA	46718	47184	93902	9.75372e-06	2.4594	AGACGCTA	18881	19799	38680	1.26272e-05	3.18394	AGACGCTA	57226	57063	114289	1.50623e-05	3.79796	AGACGCTA	5847	5785	11632	1.38161e-05	3.48374	AGACGCTA	188710	189009	377719	1.07566e-05	2.71227	AGACGCTA	74209
AGACGCTC	5004	4947	9951	5.15877e-06		AGACGCTC	3988	4094	8082	2.55017e-05	4.94338	AGACGCTC	34	85	119	3.16657e-05	6.13824	AGACGCTC	137533	136872	274405	2.85028e-05	5.52512	AGACGCTC	37708	37025	74733	2.43968e-05	4.72918	AGACGCTC	112503	112363	224866	2.96354e-05	5.74466	AGACGCTC	10676	10772	21448	2.54753e-05	4.93825	AGACGCTC	195971	194490	390461	1.11194e-05	2.15544	AGACGCTC	72175
AGACGCTG	10100	10095	20195	1.04694e-05		AGACGCTG	5542	4612	10154	3.20397e-05	3.06031	AGACGCTG	102	31	133	3.53911e-05	3.38042	AGACGCTG	226972	226297	453269	4.70816e-05	4.49706	AGACGCTG	65828	65274	131102	4.27985e-05	4.08795	AGACGCTG	137999	138188	276187	3.63991e-05	3.4767	AGACGCTG	14305	14201	28506	3.38586e-05	3.23404	AGACGCTG	287846	289147	576993	1.64314e-05	1.56946	AGACGCTG	111275
AGACGCTT	5294	5385	10679	5.53618e-06		AGACGCTT	3419	3435	6854	2.16269e-05	3.90648	AGACGCTT	34	28	62	1.64981e-05	2.98006	AGACGCTT	93809	94156	187965	1.95242e-05	3.52665	AGACGCTT	32963	33559	66522	2.17163e-05	3.92261	AGACGCTT	92155	92157	184312	2.42907e-05	4.38764	AGACGCTT	9452	9542	18994	2.25605e-05	4.07511	AGACGCTT	280588	280371	560959	1.59748e-05	2.88553	AGACGCTT	113765
AGACGGAA	7954	7715	15669	8.12308e-06		AGACGGAA	4014	3325	7339	2.31573e-05	2.8508	AGACGGAA	49	42	91	2.4215e-05	2.98101	AGACGGAA	98792	99357	198149	2.0582e-05	2.53377	AGACGGAA	31531	32675	64206	2.09602e-05	2.58033	AGACGGAA	116775	116655	233430	3.07641e-05	3.78724	AGACGGAA	13403	13323	26726	3.17444e-05	3.90792	AGACGGAA	435446	435097	870543	2.4791e-05	3.05192	AGACGGAA	177446
AGACGGAC	4027	4249	8276	4.29042e-06		AGACGGAC	2922	2461	5383	1.69854e-05	3.95891	AGACGGAC	47	58	105	2.79404e-05	6.51227	AGACGGAC	68144	68647	136791	1.42087e-05	3.31172	AGACGGAC	17533	18424	35957	1.17382e-05	2.73592	AGACGGAC	104021	103321	207342	2.73259e-05	6.36905	AGACGGAC	10509	10516	21025	2.49729e-05	5.82061	AGACGGAC	239645	239754	479399	1.36522e-05	3.18201	AGACGGAC	87706
AGACGGAG	8800	9109	17909	9.28433e-06		AGACGGAG	3600	2908	6508	2.05352e-05	2.21181	AGACGGAG	90	35	125	3.32623e-05	3.58263	AGACGGAG	74770	74583	149353	1.55135e-05	1.67093	AGACGGAG	18965	19332	38297	1.25021e-05	1.34658	AGACGGAG	141014	140597	281611	3.71139e-05	3.99748	AGACGGAG	15759	15746	31505	3.74207e-05	4.03052	AGACGGAG	297774	296958	594732	1.69366e-05	1.82421	AGACGGAG	105745
AGACGGAT	4675	4643	9318	4.83061e-06		AGACGGAT	3186	2785	5971	1.88407e-05	3.90028	AGACGGAT	28	43	71	1.8893e-05	3.9111	AGACGGAT	76596	75874	152470	1.58373e-05	3.27852	AGACGGAT	24680	23420	48100	1.57023e-05	3.25059	AGACGGAT	98175	98210	196385	2.58818e-05	5.35788	AGACGGAT	11324	11164	22488	2.67106e-05	5.52944	AGACGGAT	316946	315073	632019	1.79984e-05	3.72591	AGACGGAT	133803
AGACGGCA	7243	7314	14557	7.5466e-06		AGACGGCA	4637	3468	8105	2.55743e-05	3.38885	AGACGGCA	40	58	98	2.60777e-05	3.45555	AGACGGCA	135539	135374	270913	2.81401e-05	3.72884	AGACGGCA	49518	49474	98992	3.23162e-05	4.28221	AGACGGCA	125600	125436	251036	3.30844e-05	4.38401	AGACGGCA	12563	12759	25322	3.00767e-05	3.98547	AGACGGCA	257558	257479	515037	1.4667e-05	1.94353	AGACGGCA	105250
AGACGGCC	5623	5560	11183	5.79746e-06		AGACGGCC	3797	3554	7351	2.31952e-05	4.00092	AGACGGCC	59	73	132	3.5125e-05	6.05869	AGACGGCC	143104	141967	285071	2.96107e-05	5.10753	AGACGGCC	32248	31293	63541	2.07431e-05	3.57796	AGACGGCC	115392	113933	229325	3.02231e-05	5.21316	AGACGGCC	11585	11250	22835	2.71227e-05	4.67838	AGACGGCC	170087	170278	340365	9.6928e-06	1.6719	AGACGGCC	65099
AGACGGCG	2095	2147	4242	2.19913e-06		AGACGGCG	5766	5056	10822	3.41475e-05	15.5277	AGACGGCG	92	17	109	2.90048e-05	13.1892	AGACGGCG	221750	221794	443544	4.60715e-05	20.9499	AGACGGCG	56180	56876	113056	3.69074e-05	16.7828	AGACGGCG	141862	141924	283786	3.74005e-05	17.007	AGACGGCG	14096	13937	28033	3.32968e-05	15.1409	AGACGGCG	211680	212073	423753	1.20675e-05	5.4874	AGACGGCG	67932
AGACGGCT	5766	5755	11521	5.97268e-06		AGACGGCT	2725	2309	5034	1.58842e-05	2.65947	AGACGGCT	36	28	64	1.70303e-05	2.85137	AGACGGCT	84819	84643	169462	1.76022e-05	2.94712	AGACGGCT	25345	25487	50832	1.65942e-05	2.77835	AGACGGCT	95263	94591	189854	2.50211e-05	4.18926	AGACGGCT	9824	9885	19709	2.34098e-05	3.91947	AGACGGCT	221917	222530	444447	1.26568e-05	2.11912	AGACGGCT	90852
AGACGGGA	8018	8032	16050	8.3206e-06		AGACGGGA	2306	2396	4702	1.48366e-05	1.78311	AGACGGGA	38	53	91	2.4215e-05	2.91025	AGACGGGA	62087	62720	124807	1.29639e-05	1.55805	AGACGGGA	17431	17645	35076	1.14506e-05	1.37618	AGACGGGA	105630	105560	211190	2.7833e-05	3.34508	AGACGGGA	11804	12053	23857	2.83366e-05	3.4056	AGACGGGA	247372	247098	494470	1.40813e-05	1.69235	AGACGGGA	98695
AGACGGGC	5887	5748	11635	6.03178e-06		AGACGGGC	3464	3227	6691	2.11126e-05	3.50023	AGACGGGC	58	46	104	2.76743e-05	4.58807	AGACGGGC	112020	114034	226054	2.34805e-05	3.8928	AGACGGGC	28763	30146	58909	1.9231e-05	3.18827	AGACGGGC	110495	109695	220190	2.90191e-05	4.81104	AGACGGGC	10693	10437	21130	2.50976e-05	4.16089	AGACGGGC	155848	156016	311864	8.88115e-06	1.47239	AGACGGGC	58929
AGACGGGG	9053	8791	17844	9.25064e-06		AGACGGGG	2428	2284	4712	1.48681e-05	1.60725	AGACGGGG	67	39	106	2.82065e-05	3.04914	AGACGGGG	64285	63892	128177	1.33139e-05	1.43924	AGACGGGG	14991	14708	29699	9.6953e-06	1.04807	AGACGGGG	95683	95378	191061	2.51802e-05	2.722	AGACGGGG	10847	10830	21677	2.57473e-05	2.7833	AGACGGGG	157662	157415	315077	8.97265e-06	0.96995	AGACGGGG	56685
AGACGGGT	4517	4349	8866	4.59629e-06		AGACGGGT	2399	2416	4815	1.51931e-05	3.30552	AGACGGGT	23	38	61	1.6232e-05	3.53155	AGACGGGT	58245	58862	117107	1.21641e-05	2.6465	AGACGGGT	17430	17821	35251	1.15078e-05	2.50371	AGACGGGT	76997	76252	153249	2.01969e-05	4.39418	AGACGGGT	8532	8419	16951	2.01339e-05	4.38047	AGACGGGT	192147	191930	384077	1.09376e-05	2.37966	AGACGGGT	88105
AGACGGTA	4089	4032	8121	4.21007e-06		AGACGGTA	3772	2993	6765	2.13461e-05	5.07026	AGACGGTA	45	44	89	2.36828e-05	5.62528	AGACGGTA	80907	81058	161965	1.68235e-05	3.99602	AGACGGTA	30100	31378	61478	2.00696e-05	4.76706	AGACGGTA	75524	75234	150758	1.98686e-05	4.71931	AGACGGTA	8371	8236	16607	1.97253e-05	4.68527	AGACGGTA	224801	225118	449919	1.28126e-05	3.04333	AGACGGTA	98028
AGACGGTC	3866	3795	7661	3.97159e-06		AGACGGTC	4308	3957	8265	2.60792e-05	6.56642	AGACGGTC	46	70	116	3.08674e-05	7.77205	AGACGGTC	130300	130607	260907	2.71007e-05	6.82365	AGACGGTC	32816	33380	66196	2.16098e-05	5.4411	AGACGGTC	107223	107022	214245	2.82356e-05	7.1094	AGACGGTC	11078	10976	22054	2.61951e-05	6.59561	AGACGGTC	213323	213642	426965	1.2159e-05	3.06148	AGACGGTC	84942
AGACGGTG	8026	8180	16206	8.40147e-06		AGACGGTG	5561	4599	10160	3.20586e-05	3.81583	AGACGGTG	88	39	127	3.37945e-05	4.02245	AGACGGTG	166856	166641	333497	3.46408e-05	4.12318	AGACGGTG	43678	44104	87782	2.86566e-05	3.41091	AGACGGTG	131669	131698	263367	3.47095e-05	4.13136	AGACGGTG	13637	13806	27443	3.2596e-05	3.8798	AGACGGTG	282494	281963	564457	1.60744e-05	1.91329	AGACGGTG	120650
AGACGGTT	4491	4405	8896	4.61184e-06		AGACGGTT	3692	3209	6901	2.17752e-05	4.7216	AGACGGTT	41	24	65	1.72964e-05	3.75044	AGACGGTT	91930	90533	182463	1.89527e-05	4.10957	AGACGGTT	32276	30278	62554	2.04209e-05	4.42793	AGACGGTT	79670	79750	159420	2.10102e-05	4.55571	AGACGGTT	9358	9297	18655	2.21579e-05	4.80456	AGACGGTT	292259	292960	585219	1.66657e-05	3.61367	AGACGGTT	124202
AGACGTAA	5527	5639	11166	5.78865e-06		AGACGTAA	2725	2546	5271	1.6632e-05	2.87321	AGACGTAA	40	40	80	2.12879e-05	3.67753	AGACGTAA	51281	51619	102900	1.06884e-05	1.84643	AGACGTAA	20075	20573	40648	1.32696e-05	2.29235	AGACGTAA	51935	52424	104359	1.37536e-05	2.37596	AGACGTAA	5566	5639	11205	1.3309e-05	2.29915	AGACGTAA	322816	323434	646250	1.84037e-05	3.17927	AGACGTAA	135344
AGACGTAC	2940	2965	5905	3.06125e-06		AGACGTAC	3110	2739	5849	1.84558e-05	6.02883	AGACGTAC	59	36	95	2.52794e-05	8.25785	AGACGTAC	51899	51182	103081	1.07072e-05	3.49764	AGACGTAC	15737	15457	31194	1.01833e-05	3.32653	AGACGTAC	83410	83630	167040	2.20144e-05	7.19131	AGACGTAC	7838	7915	15753	1.87109e-05	6.11219	AGACGTAC	194728	194886	389614	1.10953e-05	3.62443	AGACGTAC	83784
AGACGTAG	4732	4504	9236	4.7881e-06		AGACGTAG	2682	2765	5447	1.71873e-05	3.58959	AGACGTAG	58	35	93	2.47472e-05	5.16847	AGACGTAG	52710	52798	105508	1.09593e-05	2.28885	AGACGTAG	14216	14471	28687	9.36493e-06	1.95588	AGACGTAG	72995	72781	145776	1.9212e-05	4.01245	AGACGTAG	7342	7396	14738	1.75054e-05	3.65601	AGACGTAG	220912	218462	439374	1.25123e-05	2.61322	AGACGTAG	90834
AGACGTAT	4985	4991	9976	5.17173e-06		AGACGTAT	2965	2475	5440	1.71652e-05	3.31905	AGACGTAT	38	52	90	2.39489e-05	4.63073	AGACGTAT	47142	46315	93457	9.7075e-06	1.87703	AGACGTAT	17277	17030	34307	1.11996e-05	2.16554	AGACGTAT	67010	66814	133824	1.76368e-05	3.41024	AGACGTAT	7250	7283	14533	1.72619e-05	3.33774	AGACGTAT	249533	249767	499300	1.42189e-05	2.74935	AGACGTAT	106035
AGACGTCA	6250	6323	12573	6.51806e-06		AGACGTCA	2368	2336	4704	1.48429e-05	2.27719	AGACGTCA	37	27	64	1.70303e-05	2.61279	AGACGTCA	52922	52377	105299	1.09375e-05	1.67804	AGACGTCA	17144	16974	34118	1.11379e-05	1.70877	AGACGTCA	97328	97655	194983	2.56971e-05	3.94244	AGACGTCA	9911	9920	19831	2.35547e-05	3.61376	AGACGTCA	310071	308954	619025	1.76284e-05	2.70454	AGACGTCA	128553
AGACGTCC	4661	4628	9289	4.81558e-06		AGACGTCC	1933	2254	4187	1.32116e-05	2.7435	AGACGTCC	40	41	81	2.1554e-05	4.47589	AGACGTCC	65868	65974	131842	1.36946e-05	2.84381	AGACGTCC	16595	15939	32534	1.06208e-05	2.20551	AGACGTCC	79491	79727	159218	2.09836e-05	4.35743	AGACGTCC	7939	7845	15784	1.87478e-05	3.89315	AGACGTCC	182352	182744	365096	1.03971e-05	2.15905	AGACGTCC	71316
AGACGTCG	1185	1235	2420	1.25457e-06		AGACGTCG	3321	3296	6617	2.08791e-05	16.6425	AGACGTCG	61	34	95	2.52794e-05	20.1498	AGACGTCG	111241	109768	221009	2.29565e-05	18.2983	AGACGTCG	27516	26212	53728	1.75396e-05	13.9806	AGACGTCG	117128	117506	234634	3.09227e-05	24.6481	AGACGTCG	10714	10444	21158	2.51308e-05	20.0315	AGACGTCG	244849	245243	490092	1.39567e-05	11.1247	AGACGTCG	90870
AGACGTCT	6145	6145	12290	6.37135e-06		AGACGTCT	1767	1767	3534	1.11511e-05	1.75019	AGACGTCT	34	24	58	1.54337e-05	2.42236	AGACGTCT	35489	35489	70978	7.37258e-06	1.15715	AGACGTCT	10867	10867	21734	7.09511e-06	1.1136	AGACGTCT	86334	86334	172668	2.27561e-05	3.57164	AGACGTCT	8411	8411	16822	1.99807e-05	3.13602	AGACGTCT	278504	278504	557008	1.58623e-05	2.48963	AGACGTCT	111788
AGACGTGA	8563	8571	17134	8.88256e-06		AGACGTGA	2646	2479	5125	1.61713e-05	1.82057	AGACGTGA	31	53	84	2.23523e-05	2.51642	AGACGTGA	50414	50539	100953	1.04861e-05	1.18053	AGACGTGA	16250	16209	32459	1.05963e-05	1.19293	AGACGTGA	83164	82953	166117	2.18928e-05	2.46469	AGACGTGA	8425	8176	16601	1.97182e-05	2.21988	AGACGTGA	312140	312155	624295	1.77785e-05	2.0015	AGACGTGA	134505
AGACGTGC	5929	5912	11841	6.13858e-06		AGACGTGC	2746	3097	5843	1.84369e-05	3.00344	AGACGTGC	44	54	98	2.60777e-05	4.24816	AGACGTGC	68876	69837	138713	1.44083e-05	2.34717	AGACGTGC	19958	20497	40455	1.32066e-05	2.15141	AGACGTGC	84321	84744	169065	2.22813e-05	3.62972	AGACGTGC	7544	7404	14948	1.77548e-05	2.89233	AGACGTGC	225727	226354	452081	1.28742e-05	2.09726	AGACGTGC	87794
AGACGTGG	10257	10317	20574	1.06659e-05		AGACGTGG	3517	2912	6429	2.02859e-05	1.90194	AGACGTGG	60	27	87	2.31506e-05	2.17052	AGACGTGG	70715	70960	141675	1.4716e-05	1.37972	AGACGTGG	18694	18704	37398	1.22087e-05	1.14464	AGACGTGG	103767	104496	208263	2.74473e-05	2.57336	AGACGTGG	10037	10180	20217	2.40132e-05	2.25139	AGACGTGG	235972	237704	473676	1.34892e-05	1.2647	AGACGTGG	99794
AGACGTGT	7542	7479	15021	7.78714e-06		AGACGTGT	2455	2351	4806	1.51647e-05	1.94741	AGACGTGT	34	56	90	2.39489e-05	3.07544	AGACGTGT	35168	35248	70416	7.3142e-06	0.939266	AGACGTGT	12113	12490	24603	8.0317e-06	1.03141	AGACGTGT	68769	69118	137887	1.81723e-05	2.33363	AGACGTGT	6547	6402	12949	1.53804e-05	1.97511	AGACGTGT	249219	249955	499174	1.42153e-05	1.82548	AGACGTGT	108622
AGACGTTA	5740	5676	11416	5.91825e-06		AGACGTTA	3180	2563	5743	1.81213e-05	3.06194	AGACGTTA	44	35	79	2.10218e-05	3.55203	AGACGTTA	55445	55823	111268	1.15576e-05	1.95287	AGACGTTA	23562	23547	47109	1.53788e-05	2.59854	AGACGTTA	48368	48665	97033	1.27881e-05	2.16079	AGACGTTA	5112	5224	10336	1.22768e-05	2.0744	AGACGTTA	274994	274757	549751	1.56556e-05	2.64531	AGACGTTA	113591
AGACGTTC	5549	5498	11047	5.72695e-06		AGACGTTC	5380	4435	9815	3.097e-05	5.40776	AGACGTTC	27	52	79	2.10218e-05	3.67068	AGACGTTC	114990	115123	230113	2.39021e-05	4.17362	AGACGTTC	35945	35805	71750	2.34229e-05	4.08995	AGACGTTC	92876	93108	185984	2.45111e-05	4.27995	AGACGTTC	9191	8957	18148	2.15557e-05	3.7639	AGACGTTC	315624	313768	629392	1.79236e-05	3.12969	AGACGTTC	130338
AGACGTTG	5908	5987	11895	6.16657e-06		AGACGTTG	4544	4592	9136	2.88275e-05	4.6748	AGACGTTG	66	45	111	2.95369e-05	4.78985	AGACGTTG	112113	113578	225691	2.34428e-05	3.8016	AGACGTTG	35274	36601	71875	2.34638e-05	3.80499	AGACGTTG	128736	128582	257318	3.39123e-05	5.49937	AGACGTTG	12972	12974	25946	3.08179e-05	4.99757	AGACGTTG	335674	335863	671537	1.91238e-05	3.1012	AGACGTTG	139322
AGACGTTT	9088	9259	18347	9.5114e-06		AGACGTTT	4333	3974	8307	2.62117e-05	2.75582	AGACGTTT	54	18	72	1.91591e-05	2.01433	AGACGTTT	90067	90312	180379	1.87362e-05	1.96987	AGACGTTT	35788	36143	71931	2.3482e-05	2.46883	AGACGTTT	83625	83761	167386	2.206e-05	2.31933	AGACGTTT	8811	8804	17615	2.09226e-05	2.19974	AGACGTTT	531791	532718	1064509	3.03147e-05	3.1872	AGACGTTT	214883
AGCCGAAA	4738	4816	9554	4.95296e-06		AGCCGAAA	3483	3268	6751	2.13019e-05	4.30085	AGCCGAAA	29	24	53	1.41032e-05	2.84744	AGCCGAAA	146857	147296	294153	3.05541e-05	6.16885	AGCCGAAA	45893	46094	91987	3.00294e-05	6.06291	AGCCGAAA	102417	102953	205370	2.7066e-05	5.46461	AGCCGAAA	11648	11457	23105	2.74434e-05	5.54082	AGCCGAAA	555124	553941	1109065	3.15836e-05	6.37671	AGCCGAAA	224471
[truncated: 3,519 more rows]
[truncated: 10 more columns]

## Sheet: Fig 1
Graph A	Length (x-axis)	4 hours	8 hours	12 hours	18 hours	24 hours		Graph B	Length (x-axis)	2 CpG sites				3 CpG sites				4 CpG sites					Graph C		Core			1 repeat			2 repeats			3 repeats
[truncated: 17 more rows]

[truncated: 4 more sheets: Fig 2, Fig 3, Fig 4, Fig 5]
